# Supplementary material for: Simultaneous Analysis of 272 Pesticides in Agricultural Products by the QuEChERS Method and Gas Chromatography with Tandem Mass Spectrometry
Source: MDPI journal article supplement (doi:10.3390/molecules29092114), 2024-05-03
Supplement: s1 [file s1]

## Supplementary Material

# Simultaneous Analysis of 272 Pesticides in Agricultural Products by the QuEChERS Method and Gas Chromatography with Tandem Mass Spectrometry

Da-Young Yun <sup>1</sup>, Ji-Yeon Bae <sup>1</sup>, Yoon-Jung Kang <sup>2</sup>, Chae-Uk Lim <sup>3</sup>, Gui-Hyun Jang <sup>1</sup>, Mi-Ok Eom <sup>1</sup> and Won-Jo Choe <sup>1,\*</sup>

<sup>1</sup> Pesticides and Veterinary Drug Residues Division, National Institute of Food and Drug Safety Evaluation, Ministry of Food and Drug Safety, Cheongju 28159, Republic of Korea; dyyun96@korea.kr (D.-Y.Y.); jjiyeon0962@korea.kr (J.-Y.B.); arion@korea.kr (G.-H.J.); miokeom@korea.kr (M.-O.E.)

<sup>2</sup> Center for Food and Drug Analysis, Busan Regional Office of Food and Drug Safety, Busan 47537, Republic of Korea; chemi07@korea.kr

<sup>3</sup> Safety Analysis Division, Experiment Research Institute, National Agricultural Products Quality Management Service, Kimcheon 39660, Republic of Korea; chaiuk@korea.kr

\* Correspondence: aragaya06@korea.kr; Tel.: +82-43-719-4206

## Supplementary Information

Table S1. The optimized GC-MS/MS parameter including to each pesticide, retention time, molecular weight, exact mass, MRM transitions, and collision energies.

[illegible]

| S# | Compound name     | Type of pesticide      | RT (min.) | Molecular Weight (g/mol) | Extract Mass (g/mol) | Precursor ion (m/z) | Product ion (m/z) | CE (V) |
|----|-------------------|------------------------|-----------|--------------------------|----------------------|---------------------|-------------------|--------|
| 8  | Anilofos          | Herbicide              | 19.85     | 367.8                    | 367.0                | 226                 | 157               | 15     |
|    |                   |                        |           |                          |                      |                     | 184               | 5      |
| 9  | Aramite           | Insecticide, Acaricide | 15.77     | 334.9                    | 334.1                | 187                 | 65                | 10     |
|    |                   |                        |           |                          |                      | 185                 | 63                | 10     |
| 10 | Aspon             | Insecticide            | 11.93     | 378.4                    | 378.0                | 211                 | 115               | 10     |
|    |                   |                        |           |                          |                      |                     | 97                | 35     |
| 11 | Atrazine          | Herbicide              | 9.21      | 216.7                    | 215.0                | 215                 | 200               | 10     |
|    |                   |                        |           |                          |                      |                     | 58                | 15     |
| 12 | Azaconazole       | Fungicide              | 15.39     | 300.1                    | 299.0                | 219                 | 175               | 15     |
|    |                   |                        |           |                          |                      | 217                 | 173               | 15     |
| 13 | Benfluralin       | Herbicide              | 8.31      | 335.3                    | 335.1                | 292                 | 160               | 20     |
|    |                   |                        |           |                          |                      |                     | 264               | 10     |
| 14 | Benfuresate       | Herbicide              | 10.62     | 256.3                    | 256.0                | 256                 | 163               | 5      |
|    |                   |                        |           |                          |                      | 163                 | 121               | 5      |
| 15 | Benodanil         | Fungicide              | 16.68     | 323.1                    | 322.9                | 231                 | 203               | 20     |
|    |                   |                        |           |                          |                      |                     | 76                | 25     |
| 16 | Benzoylprop-ethyl | Herbicide              | 18.78     | 366.2                    | 365.0                | 292                 | 105               | 10     |
|    |                   |                        |           |                          |                      | 105                 | 77                | 10     |
| 17 | BHC, $\alpha$ -   | Insecticide            | 8.77      | 290.8                    | 287.8                | 181                 | 145               | 15     |
|    |                   |                        |           |                          |                      | 217                 | 181               | 5      |
|    | BHC, $\beta$ -    | Insecticide            | 9.25      | 290.8                    | 287.8                | 181                 | 145               | 15     |
|    |                   |                        |           |                          |                      | 217                 | 181               | 5      |
|    | BHC, $\delta$ -   | Insecticide            | 10.07     | 290.8                    | 287.8                | 181                 | 145               | 15     |
|    |                   |                        |           |                          |                      | 217                 | 181               | 5      |



| S# | Compound name           | Type of pesticide                 | RT (min.) | Molecular Weight (g/mol) | Extract Mass (g/mol) | Precursor ion (m/z) | Product ion (m/z) | CE (V) |
|----|-------------------------|-----------------------------------|-----------|--------------------------|----------------------|---------------------|-------------------|--------|
| 30 | Butralin                | Herbicide, Plant growth regulator | 12.56     | 295.3                    | 295.1                | 266                 | 174               | 20     |
|    |                         |                                   |           |                          |                      |                     | 220               | 15     |
| 31 | Butylate                | Herbicide                         | 6.36      | 217.4                    | 217.3                | 156                 | 57                | 5      |
|    |                         |                                   |           |                          |                      | 146                 | 57                | 10     |
| 32 | Cadusafos               | Insecticide, Nematicide           | 8.56      | 270.4                    | 270.0                | 159                 | 97                | 20     |
|    |                         |                                   |           |                          |                      | 158                 | 97                | 20     |
| 33 | Carbophenothion         | Insecticide, Acaricide            | 17.30     | 342.9                    | 341.9                | 344                 | 159               | 5      |
|    |                         |                                   |           |                          |                      | 342                 | 157               | 5      |
| 34 | Carboxin                | Fungicide                         | 15.32     | 235.3                    | 235.0                | 235                 | 143               | 10     |
|    |                         |                                   |           |                          |                      |                     | 87                | 20     |
| 35 | Carfentrazone-ethyl     | Herbicide                         | 17.24     | 412.2                    | 411.0                | 340                 | 312               | 10     |
|    |                         |                                   |           |                          |                      | 312                 | 151               | 20     |
| 36 | Chinomethionat          | Fungicide                         | 13.99     | 234.3                    | 233.9                | 234                 | 206               | 5      |
|    |                         |                                   |           |                          |                      | 206                 | 148               | 15     |
| 37 | Chlorbenside            | Insecticide                       | 13.97     | 269.2                    | 267.9                | 268                 | 125               | 10     |
|    |                         |                                   |           |                          |                      | 125                 | 89                | 15     |
| 38 | Chlorbufam              | Herbicide                         | 9.21      | 223.7                    | 223.0                | 223                 | 53                | 15     |
|    |                         |                                   |           |                          |                      |                     | 127               | 15     |
| 39 | Chlordane- <i>cis</i>   | Insecticide                       | 14.36     | 409.8                    | 405.7                | 375                 | 266               | 20     |
|    |                         |                                   |           |                          |                      | 373                 | 266               | 20     |
|    | Chlordane- <i>trans</i> | Insecticide                       | 13.97     | 409.8                    | 405.7                | 375                 | 266               | 20     |
|    |                         |                                   |           |                          |                      | 373                 | 266               | 20     |
| 40 | Chlorethoxyfos          | Insecticide                       | 7.88      | 336.0                    | 333.8                | 153                 | 97                | 15     |
|    |                         |                                   |           |                          |                      | 97                  | 47                | 35     |

| S# | Compound name        | Type of pesticide                 | RT (min.) | Molecular Weight (g/mol) | Extract Mass (g/mol) | Precursor ion (m/z) | Product ion (m/z) | CE (V) |
|----|----------------------|-----------------------------------|-----------|--------------------------|----------------------|---------------------|-------------------|--------|
| 41 | Chlorfenapyr         | Insecticide, Acaricide            | 15.60     | 407.6                    | 405.9                | 247                 | 227               | 15     |
|    |                      |                                   |           |                          |                      | 328                 | 247               | 20     |
| 42 | Chlorfenson          | Insecticide                       | 14.72     | 303.2                    | 301.9                | 175                 | 111               | 10     |
|    |                      |                                   |           |                          |                      | 111                 | 75                | 15     |
| 43 | Chlorflurenol-methyl | Herbicide, Plant growth regulator | 13.79     | 274.7                    | 274.0                | 217                 | 152               | 25     |
|    |                      |                                   |           |                          |                      | 215                 | 152               | 20     |
| 44 | Chlornitrofen        | Herbicide                         | 17.19     | 318.5                    | 316.9                | 317                 | 287               | 15     |
|    |                      |                                   |           |                          |                      | 236                 | 173               | 5      |
| 45 | Chlorobenzilate      | Insecticide                       | 16.14     | 325.2                    | 324.0                | 251                 | 139               | 10     |
|    |                      |                                   |           |                          |                      | 139                 | 111               | 10     |
| 46 | Chloropropylate      | Insecticide                       | 16.14     | 339.2                    | 338.0                | 251                 | 139               | 10     |
|    |                      |                                   |           |                          |                      | 139                 | 111               | 10     |
| 47 | Chloroneb            | Fungicide                         | 6.94      | 207.1                    | 205.9                | 193                 | 53                | 30     |
|    |                      |                                   |           |                          |                      | 191                 | 113               | 15     |
| 48 | Chlorothalonil       | Fungicide                         | 9.79      | 265.9                    | 263.8                | 266                 | 231               | 20     |
|    |                      |                                   |           |                          |                      |                     | 170               | 30     |
| 49 | Chlorpropham         | Herbicide, Plant growth regulator | 8.25      | 213.7                    | 213.0                | 171                 | 127               | 15     |
|    |                      |                                   |           |                          |                      | 153                 | 90                | 25     |
| 50 | Chlorpyrifos         | Insecticide                       | 12.05     | 350.6                    | 348.9                | 314                 | 258               | 20     |
|    |                      |                                   |           |                          |                      | 199                 | 171               | 15     |
| 51 | Chlorpyrifos-methyl  | Insecticide                       | 10.80     | 322.5                    | 320.8                | 286                 | 271               | 20     |
|    |                      |                                   |           |                          |                      |                     | 93                | 20     |
| 52 | Chlorthal-dimethyl   | Herbicide                         | 12.18     | 332.0                    | 329.9                | 299                 | 221               | 25     |
|    |                      |                                   |           |                          |                      | 301                 | 223               | 25     |

| S# | Compound name            | Type of pesticide | RT (min.) | Molecular Weight (g/mol) | Extract Mass (g/mol) | Precursor ion (m/z) | Product ion (m/z) | CE (V) |
|----|--------------------------|-------------------|-----------|--------------------------|----------------------|---------------------|-------------------|--------|
| 53 | Chlorthion               | Insecticide       | 12.47     | 297.6                    | 296.9                | 125                 | 47                | 10     |
|    |                          |                   |           |                          |                      | 297                 | 109               | 10     |
| 54 | Chlorthiophos            | Insecticide       | 16.52     | 361.2                    | 359.9                | 325                 | 269               | 10     |
|    |                          |                   |           |                          |                      | 269                 | 205               | 10     |
| 55 | Chlozolate               | Fungicide         | 13.22     | 332.1                    | 331.0                | 331                 | 259               | 5      |
|    |                          |                   |           |                          |                      | 259                 | 188               | 10     |
| 56 | Cinmethylin              | Herbicide         | 11.27     | 274.4                    | 274.1                | 154                 | 111               | 5      |
|    |                          |                   |           |                          |                      | 169                 | 107               | 10     |
| 57 | Clomazone                | Herbicide         | 9.32      | 239.7                    | 239.0                | 125                 | 89                | 15     |
|    |                          |                   |           |                          |                      | 204                 | 107               | 25     |
| 58 | Coumaphos                | Insecticide       | 22.61     | 362.8                    | 362.0                | 210                 | 182               | 5      |
|    |                          |                   |           |                          |                      | 226                 | 163               | 10     |
| 59 | Cyanophos                | Insecticide       | 9.53      | 243.2                    | 243.0                | 125                 | 79                | 5      |
|    |                          |                   |           |                          |                      | 243                 | 109               | 10     |
| 60 | Cyflufenamid             | Fungicide         | 15.67     | 412.4                    | 412.1                | 223                 | 203               | 12     |
|    |                          |                   |           |                          |                      | 188                 | 88                | 40     |
| 61 | Cyfluthrin               | Insecticide       | 23.99     | 434.3                    | 433.0                | 226                 | 206               | 10     |
|    |                          |                   |           |                          |                      | 163                 | 127               | 5      |
| 62 | Cyhalofop-butyl          | Herbicide         | 20.98     | 357.4                    | 357.1                | 256                 | 120               | 20     |
|    |                          |                   |           |                          |                      | 229                 | 109               | 15     |
| 63 | Cyhalothrin, $\gamma$ -  | Insecticide       | 20.93     | 449.9                    | 449.1                | 208                 | 181               | 5      |
|    |                          |                   |           |                          |                      | 197                 | 141               | 10     |
|    | Cyhalothrin, $\lambda$ - | Insecticide       | 21.27     | 449.9                    | 449.1                | 208                 | 181               | 5      |
|    |                          |                   |           |                          |                      | 197                 | 141               | 10     |



| S# | Compound name   | Type of pesticide       | RT (min.) | Molecular Weight (g/mol) | Extract Mass (g/mol) | Precursor ion (m/z) | Product ion (m/z) | CE (V) |
|----|-----------------|-------------------------|-----------|--------------------------|----------------------|---------------------|-------------------|--------|
| 73 | Dichlobenil     | Herbicide               | 5.80      | 172.0                    | 170.9                | 173                 | 136               | 10     |
|    |                 |                         |           |                          |                      | 171                 | 136               | 30     |
| 74 | Dichlofenthion  | Insecticide, Nematicide | 10.65     | 315.1                    | 313.9                | 279                 | 223               | 10     |
|    |                 |                         |           |                          |                      | 223                 | 205               | 15     |
| 75 | Dichlofluanid   | Fungicide               | 8.27      | 333.2                    | 331.9                | 224                 | 123               | 24     |
|    |                 |                         |           |                          |                      | 123                 | 77                | 28     |
| 76 | Dichlormid      | Herbicide safener       | 5.86      | 208.1                    | 207.0                | 172                 | 108               | 5      |
|    |                 |                         |           |                          |                      | 166                 | 56                | 10     |
| 77 | Diclobutrazol   | Fungicide               | 15.37     | 328.2                    | 327.0                | 272                 | 161               | 10     |
|    |                 |                         |           |                          |                      | 270                 | 159               | 15     |
| 78 | Diclofop-methyl | Herbicide               | 18.21     | 341.2                    | 340.0                | 340                 | 253               | 10     |
|    |                 |                         |           |                          |                      | 253                 | 162               | 40     |
| 79 | Dicloran        | Fungicide               | 9.01      | 207.0                    | 205.9                | 160                 | 124               | 10     |
|    |                 |                         |           |                          |                      | 206                 | 176               | 15     |
| 80 | Dicofol         | Acaricide               | 12.49     | 370.5                    | 367.9                | 139                 | 75                | 35     |
|    |                 |                         |           |                          |                      |                     | 111               | 15     |
| 81 | Dicrotophos     | Insecticide, Acaricide  | 8.28      | 237.2                    | 237.0                | 127                 | 95                | 15     |
|    |                 |                         |           |                          |                      | 193                 | 127               | 5      |
| 82 | Diethatyl-ethyl | Herbicide               | 14.44     | 311.8                    | 311.1                | 188                 | 160               | 10     |
|    |                 |                         |           |                          |                      |                     | 130               | 40     |
| 83 | Diethofencarb   | Fungicide               | 12.10     | 267.3                    | 267.1                | 267                 | 225               | 5      |
|    |                 |                         |           |                          |                      | 225                 | 168               | 10     |
| 84 | Difenoconazole  | Fungicide               | 26.90     | 406.3                    | 405.0                | 325                 | 267               | 15     |
|    |                 |                         |           |                          |                      | 323                 | 265               | 15     |

| S# | Compound name                | Type of pesticide | RT (min.) | Molecular Weight (g/mol) | Extract Mass (g/mol) | Precursor ion (m/z) | Product ion (m/z) | CE (V) |
|----|------------------------------|-------------------|-----------|--------------------------|----------------------|---------------------|-------------------|--------|
| 85 | Diflufenican                 | Herbicide         | 18.29     | 394.3                    | 394.0                | 266                 | 218               | 25     |
|    |                              |                   |           |                          |                      |                     | 238               | 15     |
| 86 | Dimepiperate                 | Herbicide         | 13.61     | 263.4                    | 263.1                | 145                 | 112               | 5      |
|    |                              |                   |           |                          |                      |                     | 69                | 15     |
| 87 | Dimethachlor                 | Herbicide         | 10.66     | 255.7                    | 255.1                | 134                 | 105               | 15     |
|    |                              |                   |           |                          |                      | 197                 | 148               | 10     |
| 88 | Dimethametryn                | Herbicide         | 13.19     | 255.4                    | 255.1                | 212                 | 122               | 5      |
|    |                              |                   |           |                          |                      |                     | 94                | 20     |
| 89 | Dimethenamid                 | Herbicide         | 10.67     | 275.8                    | 275.0                | 154                 | 111               | 10     |
|    |                              |                   |           |                          |                      | 230                 | 154               | 10     |
| 90 | Dimethipin                   | Herbicide         | 9.24      | 210.3                    | 210.0                | 124                 | 76                | 5      |
|    |                              |                   |           |                          |                      | 118                 | 58                | 5      |
| 91 | Dimethomorph ( <i>E</i> )    | Fungicide         | 27.99     | 387.9                    | 387.1                | 301                 | 165               | 12     |
|    |                              |                   |           |                          |                      | 387                 | 301               | 12     |
|    | Dimethomorph ( <i>Z</i> )    | Fungicide         | 28.58     | 387.9                    | 387.1                | 387                 | 301               | 12     |
|    |                              |                   |           |                          |                      | 301                 | 165               | 12     |
| 92 | Dimethylvinphos ( <i>E</i> ) | Insecticide       | 11.73     | 331.5                    | 329.9                | 295                 | 109               | 20     |
|    |                              |                   |           |                          |                      | 297                 | 109               | 20     |
|    | Dimethylvinphos ( <i>Z</i> ) | Insecticide       | 12.10     | 331.5                    | 329.9                | 295                 | 109               | 20     |
|    |                              |                   |           |                          |                      | 297                 | 109               | 20     |
| 93 | Diniconazole                 | Fungicide         | 16.25     | 326.2                    | 325.0                | 268                 | 136               | 35     |
|    |                              |                   |           |                          |                      |                     | 232               | 15     |
| 94 | Dinitramine                  | Herbicide         | 9.85      | 322.2                    | 322.0                | 261                 | 241               | 10     |
|    |                              |                   |           |                          |                      | 261                 | 195               | 20     |



| S#  | Compound name | Type of pesticide       | RT (min.) | Molecular Weight (g/mol) | Extract Mass (g/mol) | Precursor ion (m/z) | Product ion (m/z) | CE (V) |
|-----|---------------|-------------------------|-----------|--------------------------|----------------------|---------------------|-------------------|--------|
| 104 | EPTC          | Herbicide               | 5.88      | 189.3                    | 189.1                | 132                 | 90                | 5      |
|     |               |                         |           |                          |                      | 189                 | 128               | 5      |
| 105 | Etaconazole-1 | Fungicide               | 16.35     | 328.2                    | 327.0                | 173                 | 109               | 25     |
|     |               |                         |           |                          |                      | 245                 | 173               | 20     |
|     | Etaconazole-2 | Fungicide               | 16.75     | 328.2                    | 327.0                | 173                 | 109               | 25     |
|     |               |                         |           |                          |                      | 245                 | 173               | 20     |
| 106 | Ethalfluralin | Herbicide               | 8.12      | 333.3                    | 333.0                | 276                 | 202               | 15     |
|     |               |                         |           |                          |                      | 316                 | 276               | 5      |
| 107 | Ethion        | Insecticide, Acaricide  | 16.45     | 384.5                    | 383.9                | 231                 | 129               | 25     |
|     |               |                         |           |                          |                      |                     | 175               | 10     |
| 108 | Ethofumesate  | Herbicide               | 11.67     | 286.3                    | 286.0                | 161                 | 105               | 10     |
|     |               |                         |           |                          |                      | 207                 | 137               | 10     |
| 109 | Ethoprophos   | Insecticide, Nematicide | 8.06      | 242.3                    | 242.0                | 158                 | 114               | 5      |
|     |               |                         |           |                          |                      |                     | 97                | 20     |
| 110 | Ethychlozate  | Plant growth regulator  | 13.29     | 238.7                    | 238.0                | 165                 | 138               | 10     |
|     |               |                         |           |                          |                      |                     | 102               | 15     |
| 111 | Etoxazole     | Acaricide               | 19.65     | 359.4                    | 359.1                | 300                 | 270               | 25     |
|     |               |                         |           |                          |                      | 204                 | 176               | 10     |
| 112 | Etridiazole   | Fungicide               | 6.55      | 247.5                    | 245.9                | 211                 | 140               | 25     |
|     |               |                         |           |                          |                      |                     | 183               | 10     |
| 113 | Fenamidone    | Fungicide               | 19.67     | 311.4                    | 311.1                | 268                 | 180               | 20     |
|     |               |                         |           |                          |                      | 238                 | 237               | 10     |
| 114 | Fenarimol     | Fungicide               | 21.40     | 331.2                    | 330.0                | 251                 | 139               | 15     |
|     |               |                         |           |                          |                      | 219                 | 107               | 10     |

| S#  | Compound name | Type of pesticide      | RT (min.) | Molecular Weight (g/mol) | Extract Mass (g/mol) | Precursor ion (m/z) | Product ion (m/z) | CE (V) |
|-----|---------------|------------------------|-----------|--------------------------|----------------------|---------------------|-------------------|--------|
| 115 | Fenbuconazole | Fungicide              | 23.57     | 336.8                    | 336.1                | 198                 | 129               | 5      |
|     |               |                        |           |                          |                      | 129                 | 78                | 20     |
| 116 | Fenchlorphos  | Insecticide            | 11.24     | 321.5                    | 319.9                | 285                 | 270               | 20     |
|     |               |                        |           |                          |                      |                     | 240               | 30     |
| 117 | Fencloirim    | Herbicide safener      | 8.78      | 225.1                    | 223.9                | 189                 | 104               | 10     |
|     |               |                        |           |                          |                      | 224                 | 189               | 20     |
| 118 | Fenfuram      | Fungicide              | 9.99      | 201.2                    | 201.0                | 201                 | 109               | 25     |
|     |               |                        |           |                          |                      | 109                 | 53                | 20     |
| 119 | Fenitrothion  | Insecticide            | 11.61     | 277.2                    | 277.0                | 277                 | 260               | 5      |
|     |               |                        |           |                          |                      |                     | 109               | 20     |
| 120 | Fenobucarb    | Insecticide            | 7.77      | 207.3                    | 207.1                | 121                 | 103               | 15     |
|     |               |                        |           |                          |                      | 150                 | 121               | 5      |
| 121 | Fenothiocarb  | Acaricide              | 14.26     | 253.4                    | 253.1                | 72                  | 56                | 10     |
|     |               |                        |           |                          |                      | 160                 | 72                | 8      |
| 122 | Fenoxanil     | Fungicide              | 15.84     | 329.2                    | 328.0                | 189                 | 125               | 10     |
|     |               |                        |           |                          |                      |                     | 154               | 10     |
| 123 | Fenpropathrin | Insecticide, Acaricide | 19.71     | 349.4                    | 349.1                | 265                 | 210               | 10     |
|     |               |                        |           |                          |                      |                     | 89                | 40     |
| 124 | Fenpropimorph | Fungicide              | 12.28     | 303.5                    | 303.2                | 128                 | 70                | 15     |
|     |               |                        |           |                          |                      |                     | 110               | 10     |
| 125 | Fenpyrazamine | Fungicide              | 21.33     | 331.4                    | 331.1                | 230                 | 188               | 10     |
|     |               |                        |           |                          |                      |                     | 117               | 30     |
| 126 | Fenson        | Insecticide, Acaricide | 12.64     | 268.7                    | 267.9                | 141                 | 77                | 10     |
|     |               |                        |           |                          |                      | 268                 | 77                | 20     |

| S#  | Compound name      | Type of pesticide      | RT (min.) | Molecular Weight (g/mol) | Extract Mass (g/mol) | Precursor ion (m/z) | Product ion (m/z) | CE (V) |
|-----|--------------------|------------------------|-----------|--------------------------|----------------------|---------------------|-------------------|--------|
| 127 | Fenthion           | Insecticide            | 12.17     | 278.3                    | 278.0                | 278                 | 109               | 20     |
|     |                    |                        |           |                          |                      |                     | 169               | 20     |
| 128 | Fenvalerate-1      | Insecticide, Acaricide | 26.06     | 419.9                    | 419.1                | 167                 | 125               | 10     |
|     |                    |                        |           |                          |                      | 169                 | 127               | 10     |
|     | Fenvalerate-2      | Insecticide, Acaricide | 26.47     | 419.9                    | 419.1                | 167                 | 125               | 10     |
|     |                    |                        |           |                          |                      | 169                 | 127               | 10     |
| 129 | Fipronil           | Insecticide            | 13.10     | 437.1                    | 435.9                | 367                 | 213               | 30     |
|     |                    |                        |           |                          |                      |                     | 255               | 30     |
| 130 | Flamprop-isopropyl | Herbicide              | 16.19     | 363.8                    | 363.1                | 105                 | 77                | 15     |
|     |                    |                        |           |                          |                      |                     | 51                | 40     |
| 131 | Fluacrypyrim       | Acaricide              | 16.80     | 426.4                    | 426.1                | 145                 | 102               | 30     |
|     |                    |                        |           |                          |                      | 204                 | 189               | 5      |
| 132 | Fluazifop-butyl    | Herbicide              | 15.96     | 383.4                    | 383.1                | 282                 | 91                | 5      |
|     |                    |                        |           |                          |                      |                     | 238               | 25     |
| 133 | Fluchloralin       | Herbicide              | 9.66      | 355.7                    | 355.0                | 306                 | 264               | 5      |
|     |                    |                        |           |                          |                      | 326                 | 63                | 15     |
| 134 | Flucythrinate-1    | Insecticide            | 24.74     | 451.5                    | 451.1                | 157                 | 107               | 15     |
|     |                    |                        |           |                          |                      | 199                 | 107               | 25     |
|     | Flucythrinate-2    | Insecticide            | 25.13     | 451.5                    | 451.1                | 157                 | 107               | 15     |
|     |                    |                        |           |                          |                      | 199                 | 107               | 25     |
| 135 | Fluensulfone       | Nematicide             | 7.70      | 291.7                    | 290.9                | 119                 | 59                | 30     |
|     |                    |                        |           |                          |                      |                     | 92                | 10     |
| 136 | Flufenpyr-ethyl    | Herbicide              | 16.15     | 408.7                    | 408.0                | 408                 | 345               | 15     |
|     |                    |                        |           |                          |                      | 321                 | 286               | 15     |

| S#  | Compound name    | Type of pesticide      | RT (min.) | Molecular Weight (g/mol) | Extract Mass (g/mol) | Precursor ion (m/z) | Product ion (m/z) | CE (V) |
|-----|------------------|------------------------|-----------|--------------------------|----------------------|---------------------|-------------------|--------|
| 137 | Flumetralin      | Plant growth regulator | 14.20     | 421.7                    | 421.0                | 143                 | 117               | 20     |
|     |                  |                        |           |                          |                      |                     | 107               | 30     |
| 138 | Flumioxazin      | Herbicide              | 25.95     | 354.3                    | 354.1                | 354                 | 326               | 5      |
|     |                  |                        |           |                          |                      | 287                 | 259               | 5      |
| 139 | Fluopyram        | Fungicide              | 13.35     | 396.7                    | 396.0                | 173                 | 95                | 35     |
|     |                  |                        |           |                          |                      |                     | 145               | 20     |
| 140 | Fluorochloridone | Herbicide              | 12.49     | 312.1                    | 311.0                | 187                 | 109               | 20     |
|     |                  |                        |           |                          |                      | 311                 | 174               | 20     |
| 141 | Fluquinconazole  | Fungicide              | 22.84     | 376.2                    | 375.0                | 340                 | 108               | 40     |
|     |                  |                        |           |                          |                      |                     | 286               | 30     |
| 142 | Flusilazole      | Fungicide              | 15.26     | 315.4                    | 315.1                | 233                 | 165               | 20     |
|     |                  |                        |           |                          |                      |                     | 152               | 20     |
| 143 | Flutianil        | Fungicide              | 25.19     | 426.4                    | 426.0                | 231                 | 216               | 5      |
|     |                  |                        |           |                          |                      |                     | 200               | 10     |
| 144 | Fluvalinate-1    | Insecticide, Acaricide | 26.36     | 502.9                    | 502.1                | 250                 | 55                | 20     |
|     |                  |                        |           |                          |                      |                     | 200               | 20     |
|     | Fluvalinate-2    | Insecticide, Acaricide | 26.51     | 502.9                    | 502.1                | 250                 | 55                | 20     |
|     |                  |                        |           |                          |                      |                     | 200               | 20     |
| 145 | Fluxapyroxad     | Fungicide              | 19.27     | 381.3                    | 380.0                | 159                 | 43                | 30     |
|     |                  |                        |           |                          |                      |                     | 139               | 10     |
| 146 | Fonofos          | Insecticide            | 9.64      | 246.3                    | 246.0                | 246                 | 137               | 5      |
|     |                  |                        |           |                          |                      |                     | 109               | 15     |
| 147 | Formothion       | Insecticide, Acaricide | 10.40     | 257.3                    | 256.9                | 126                 | 93                | 5      |
|     |                  |                        |           |                          |                      | 170                 | 93                | 15     |

| S#  | Compound name      | Type of pesticide       | RT (min.) | Molecular Weight (g/mol) | Extract Mass (g/mol) | Precursor ion (m/z) | Product ion (m/z) | CE (V) |
|-----|--------------------|-------------------------|-----------|--------------------------|----------------------|---------------------|-------------------|--------|
| 148 | Fthalide           | Fungicide               | 12.52     | 271.9                    | 269.8                | 241                 | 213               | 15     |
|     |                    |                         |           |                          |                      | 243                 | 215               | 15     |
| 149 | Halfenprox         | Acaricide               | 24.51     | 477.3                    | 476.0                | 265                 | 117               | 10     |
|     |                    |                         |           |                          |                      | 263                 | 129               | 40     |
| 150 | Heptachlor         | Insecticide             | 11.22     | 373.3                    | 369.8                | 272                 | 237               | 20     |
|     |                    |                         |           |                          |                      | 274                 | 237               | 20     |
|     | Heptachlor epoxide | Metabolite              | 13.26     | 389.3                    | 385.8                | 353                 | 253               | 30     |
|     |                    |                         |           |                          |                      | 217                 | 182               | 20     |
| 151 | Heptenophos        | Insecticide             | 7.46      | 250.6                    | 250.0                | 124                 | 63                | 40     |
|     |                    |                         |           |                          |                      |                     | 89                | 15     |
| 152 | Hexythiazox        | Acaricide               | 13.96     | 352.9                    | 352.1                | 184                 | 149               | 5      |
|     |                    |                         |           |                          |                      | 156                 | 155               | 5      |
| 153 | Indanofan          | Herbicide               | 19.78     | 340.8                    | 340.0                | 139                 | 75                | 35     |
|     |                    |                         |           |                          |                      | 159                 | 103               | 15     |
| 154 | Indoxacarb         | Insecticide             | 27.34     | 527.8                    | 527.0                | 203                 | 106               | 25     |
|     |                    |                         |           |                          |                      |                     | 134               | 15     |
| 155 | Ipconazole         | Fungicide               | 21.28     | 333.9                    | 333.1                | 125                 | 99                | 20     |
|     |                    |                         |           |                          |                      |                     | 89                | 20     |
| 156 | Iprobenfos         | Fungicide               | 10.28     | 288.3                    | 288.0                | 204                 | 91                | 10     |
|     |                    |                         |           |                          |                      |                     | 121               | 35     |
| 157 | Iprodione          | Nematicide, Fungicide   | 19.03     | 330.2                    | 329.0                | 314                 | 56                | 20     |
|     |                    |                         |           |                          |                      |                     | 245               | 10     |
| 158 | Isazofos           | Insecticide, Nematicide | 9.93      | 313.7                    | 313.0                | 257                 | 162               | 5      |
|     |                    |                         |           |                          |                      | 208                 | 166               | 10     |









| S#  | Compound name         | Type of pesticide      | RT (min.) | Molecular Weight (g/mol) | Extract Mass (g/mol) | Precursor ion (m/z) | Product ion (m/z) | CE (V) |
|-----|-----------------------|------------------------|-----------|--------------------------|----------------------|---------------------|-------------------|--------|
| 204 | Phosmet               | Insecticide, Acaricide | 19.15     | 317.3                    | 316.9                | 160                 | 133               | 10     |
|     |                       |                        |           |                          |                      |                     | 77                | 30     |
| 205 | Picoxystrobin         | Fungicide              | 14.41     | 367.3                    | 367.1                | 145                 | 102               | 30     |
|     |                       |                        |           |                          |                      | 335                 | 173               | 10     |
| 206 | Piperonyl butoxide    | Insecticide synergist  | 18.50     | 338.4                    | 338.2                | 176                 | 131               | 25     |
|     |                       |                        |           |                          |                      |                     | 145               | 10     |
| 207 | Pirimicarb            | Insecticide            | 10.22     | 238.3                    | 238.1                | 166                 | 96                | 12     |
|     |                       |                        |           |                          |                      | 238                 | 166               | 10     |
| 208 | Pirimiphos-ethyl      | Insecticide            | 12.69     | 333.4                    | 333.1                | 304                 | 168               | 10     |
|     |                       |                        |           |                          |                      | 318                 | 166               | 10     |
| 209 | Pirimiphos-methyl     | Insecticide, Acaricide | 11.55     | 305.3                    | 305.0                | 290                 | 125               | 20     |
|     |                       |                        |           |                          |                      | 233                 | 151               | 5      |
| 210 | Pretilachlor          | Herbicide              | 14.86     | 311.9                    | 311.1                | 162                 | 132               | 20     |
|     |                       |                        |           |                          |                      | 262                 | 202               | 5      |
| 211 | Prochloraz            | Fungicide              | 22.97     | 376.7                    | 375.0                | 308                 | 70                | 15     |
|     |                       |                        |           |                          |                      | 180                 | 138               | 10     |
|     | 2,4,6-trichlorophenol | Metabolite             | 5.90      | 376.7                    | 375.0                | 132                 | 97                | 15     |
|     |                       |                        |           |                          |                      | 196                 | 97                | 40     |
| 212 | Procymidone           | Fungicide              | 13.57     | 284.1                    | 283.0                | 283                 | 96                | 5      |
|     |                       |                        |           |                          |                      | 285                 | 96                | 5      |
| 213 | Prodiamine            | Herbicide              | 11.59     | 350.3                    | 350.1                | 275                 | 255               | 10     |
|     |                       |                        |           |                          |                      | 321                 | 279               | 10     |
| 214 | Profenofos            | Insecticide, Acaricide | 14.95     | 373.6                    | 371.9                | 337                 | 267               | 10     |
|     |                       |                        |           |                          |                      | 339                 | 269               | 10     |





| S#  | Compound name    | Type of pesticide      | RT (min.) | Molecular Weight (g/mol) | Extract Mass (g/mol) | Precursor ion (m/z) | Product ion (m/z) | CE (V) |
|-----|------------------|------------------------|-----------|--------------------------|----------------------|---------------------|-------------------|--------|
| 237 | Quinalphos       | Insecticide, Acaricide | 13.49     | 298.3                    | 298.0                | 146                 | 118               | 10     |
|     |                  |                        |           |                          |                      |                     | 91                | 30     |
| 238 | Quinoxifen       | Fungicide              | 17.43     | 308.1                    | 306.9                | 237                 | 208               | 30     |
|     |                  |                        |           |                          |                      | 307                 | 237               | 20     |
| 239 | Quintozene       | Fungicide              | 9.35      | 295.3                    | 292.8                | 249                 | 214               | 10     |
|     |                  |                        |           |                          |                      | 295                 | 237               | 20     |
| 240 | Quizalofop-ethyl | Herbicide              | 24.68     | 372.8                    | 372.0                | 372                 | 299               | 10     |
|     |                  |                        |           |                          |                      | 299                 | 255               | 15     |
| 241 | Silafluofen      | Insecticide            | 25.31     | 408.6                    | 408.1                | 179                 | 91                | 10     |
|     |                  |                        |           |                          |                      | 286                 | 258               | 10     |
| 242 | Simeconazole     | Fungicide              | 10.98     | 293.4                    | 293.1                | 121                 | 101               | 15     |
|     |                  |                        |           |                          |                      |                     | 75                | 35     |
| 243 | Simetryn         | Herbicide              | 11.08     | 213.3                    | 213.1                | 213                 | 170               | 10     |
|     |                  |                        |           |                          |                      |                     | 185               | 10     |
| 244 | Spiromesifen     | Insecticide, Acaricide | 18.75     | 370.5                    | 370.2                | 272                 | 209               | 10     |
|     |                  |                        |           |                          |                      |                     | 254               | 10     |
| 245 | Spiroxamine-1    | Fungicide              | 10.98     | 297.5                    | 297.2                | 100                 | 72                | 5      |
|     | Spiroxamine-2    | Fungicide              | 11.78     |                          |                      | 198                 | 126               | 5      |
| 246 | Sulfotep         | Insecticide, Acaricide | 8.39      | 322.3                    | 322.0                | 202                 | 146               | 10     |

| S#  | Compound name     | Type of pesticide                 | RT (min.) | Molecular Weight (g/mol) | Extract Mass (g/mol) | Precursor ion (m/z) | Product ion (m/z) | CE (V) |
|-----|-------------------|-----------------------------------|-----------|--------------------------|----------------------|---------------------|-------------------|--------|
|     |                   |                                   |           |                          |                      | 322                 | 146               | 25     |
| 247 | Tebuconazole      | Fungicide                         | 18.09     | 307.8                    | 307.1                | 250                 | 125               | 30     |
|     |                   |                                   |           |                          |                      | 252                 | 127               | 30     |
| 248 | Tebufenpyrad      | Acaricide                         | 19.89     | 333.9                    | 333.1                | 276                 | 171               | 10     |
|     |                   |                                   |           |                          |                      | 333                 | 171               | 20     |
| 249 | Tebupirimfos      | Insecticide                       | 10.21     | 318.4                    | 318.1                | 276                 | 234               | 5      |
|     |                   |                                   |           |                          |                      | 261                 | 137               | 15     |
| 250 | Tecnazene         | Fungicide, Plant growth regulator | 7.70      | 260.9                    | 258.8                | 213                 | 142               | 25     |
|     |                   |                                   |           |                          |                      | 215                 | 179               | 25     |
| 251 | Tefluthrin        | Insecticide                       | 9.95      | 418.7                    | 418.0                | 177                 | 137               | 20     |
|     |                   |                                   |           |                          |                      |                     | 127               | 20     |
| 252 | Terbacil          | Herbicide                         | 9.89      | 216.7                    | 216.0                | 160                 | 76                | 15     |
|     |                   |                                   |           |                          |                      | 161                 | 88                | 20     |
| 253 | Terbumeton        | Herbicide                         | 9.32      | 225.3                    | 225.1                | 169                 | 154               | 10     |
|     |                   |                                   |           |                          |                      | 210                 | 100               | 20     |
| 254 | Terbutryn         | Herbicide                         | 11.60     | 241.4                    | 241.1                | 185                 | 170               | 5      |
|     |                   |                                   |           |                          |                      | 241                 | 185               | 0      |
| 255 | Tetrachlorvinphos | Insecticide                       | 14.10     | 366.0                    | 363.8                | 329                 | 109               | 25     |
|     |                   |                                   |           |                          |                      | 331                 | 109               | 25     |
| 256 | Tetraconazole     | Fungicide                         | 12.34     | 372.1                    | 371.0                | 336                 | 204               | 40     |
|     |                   |                                   |           |                          |                      |                     | 218               | 20     |
| 257 | Tetradifon        | Acaricide                         | 20.21     | 356.0                    | 353.8                | 229                 | 201               | 10     |
|     |                   |                                   |           |                          |                      | 159                 | 111               | 20     |
| 258 | Tetramethrin-1    | Insecticide                       | 19.18     | 331.4                    | 331.1                | 164                 | 77                | 25     |

| S#  | Compound name    | Type of pesticide                  | RT (min.) | Molecular Weight (g/mol) | Extract Mass (g/mol) | Precursor ion (m/z) | Product ion (m/z) | CE (V) |
|-----|------------------|------------------------------------|-----------|--------------------------|----------------------|---------------------|-------------------|--------|
|     | Tetramethrin-2   | Insecticide                        | 19.68     | 331.4                    | 331.1                | 164                 | 107               | 15     |
|     |                  |                                    |           |                          |                      |                     | 77                | 25     |
|     |                  |                                    |           |                          |                      |                     | 107               | 15     |
| 259 | Thiﬂuzamide      | Fungicide                          | 15.10     | 528.1                    | 525.8                | 194                 | 125               | 25     |
|     |                  |                                    |           |                          |                      |                     | 166               | 10     |
| 260 | Thiometon        | Insecticide, Acaricide             | 8.89      | 246.3                    | 245.9                | 125                 | 47                | 25     |
|     |                  |                                    |           |                          |                      | 93                  | 63                | 5      |
| 261 | Thionazin        | Insecticide, Nematicide            | 7.76      | 248.2                    | 248.0                | 192                 | 96                | 15     |
|     |                  |                                    |           |                          |                      | 248                 | 140               | 10     |
| 262 | Tolclofos-methyl | Fungicide                          | 11.00     | 301.1                    | 299.9                | 265                 | 93                | 30     |
|     |                  |                                    |           |                          |                      |                     | 250               | 15     |
| 263 | Triadimefon      | Fungicide                          | 12.36     | 293.8                    | 293.0                | 208                 | 111               | 35     |
|     |                  |                                    |           |                          |                      |                     | 181               | 10     |
| 264 | Triadimenol      | Fungicide                          | 13.59     | 295.8                    | 295.1                | 130                 | 65                | 25     |
|     |                  |                                    |           |                          |                      | 128                 | 65                | 20     |
| 265 | Tri-allate       | Herbicide                          | 10.11     | 304.7                    | 303.0                | 268                 | 184               | 10     |
|     |                  |                                    |           |                          |                      |                     | 226               | 20     |
| 266 | Triazophos       | Insecticide, Nematicide, Acaricide | 16.94     | 313.3                    | 313.0                | 161                 | 134               | 5      |
|     |                  |                                    |           |                          |                      |                     | 106               | 15     |
| 267 | Tridiphane       | Herbicide synergist                | 11.29     | 320.4                    | 317.8                | 173                 | 109               | 30     |
|     |                  |                                    |           |                          |                      | 187                 | 159               | 15     |
| 268 | Trifloxystrobin  | Fungicide                          | 17.49     | 408.4                    | 408.1                | 116                 | 89                | 15     |
|     |                  |                                    |           |                          |                      | 222                 | 130               | 10     |
| 269 | Triflumizole     | Fungicide                          | 13.66     | 345.8                    | 345.0                | 206                 | 179               | 15     |

| S#  | Compound name | Type of pesticide | RT (min.) | Molecular Weight (g/mol) | Extract Mass (g/mol) | Precursor ion (m/z) | Product ion (m/z) | CE (V) |
|-----|---------------|-------------------|-----------|--------------------------|----------------------|---------------------|-------------------|--------|
|     |               |                   |           |                          |                      | 278                 | 43                | 15     |
| 270 | Trifluralin   | Herbicide         | 8.26      | 335.3                    | 335.1                | 264                 | 206               | 5      |
|     |               |                   |           |                          |                      | 306                 | 264               | 10     |
| 271 | Vinclozolin   | Fungicide         | 10.89     | 286.1                    | 284.9                | 198                 | 145               | 15     |
|     |               |                   |           |                          |                      | 187                 | 124               | 20     |
| 272 | Zoxamide      | Fungicide         | 18.62     | 336.6                    | 335.0                | 187                 | 159               | 20     |
|     |               |                   |           |                          |                      |                     | 123               | 30     |

Table S2. Method validation parameter of 272 pesticides in brown rice.

| No. | Analyte           | LOD   | LOQ   | R <sup>2</sup> | ME.(%) | Repeatability (n=5)      |           |                          |           |                         |           | Reproducibility (n=11)   |           |                          |           |                         |           |
|-----|-------------------|-------|-------|----------------|--------|--------------------------|-----------|--------------------------|-----------|-------------------------|-----------|--------------------------|-----------|--------------------------|-----------|-------------------------|-----------|
|     |                   |       |       |                |        | 0.01 mg kg <sup>-1</sup> |           | 0.02 mg kg <sup>-1</sup> |           | 0.1 mg kg <sup>-1</sup> |           | 0.01 mg kg <sup>-1</sup> |           | 0.02 mg kg <sup>-1</sup> |           | 0.1 mg kg <sup>-1</sup> |           |
|     |                   |       |       |                |        | Rec.<br>(%)              | CV<br>(%) | Rec.<br>(%)              | CV<br>(%) | Rec.<br>(%)             | CV<br>(%) | Rec.<br>(%)              | CV<br>(%) | Rec.<br>(%)              | CV<br>(%) | Rec.<br>(%)             | CV<br>(%) |
| 1   | 2,6-DIPN          | 0.002 | 0.006 | 0.9979         | 140.7  | 119.4                    | 1.6       | 104.9                    | 1.7       | 108.3                   | 2.7       | 115.7                    | 7.7       | 145.0                    | 28.0      | 101.2                   | 15.1      |
| 2   | Acetochlor        | 0.001 | 0.002 | 0.9985         | 106.2  | 113.7                    | 1.4       | 114.4                    | 1.3       | 98.6                    | 2.3       | 96.4                     | 16.1      | 97.1                     | 12.7      | 97.2                    | 9.2       |
|     | EMA               | 0.002 | 0.007 | 0.9983         | 79.5   | 64.5                     | 3.2       | 105.3                    | 8.9       | 107.2                   | 1.0       | 94.3                     | 23.2      | 97.1                     | 18.1      | 94.0                    | 9.1       |
|     | HEMA              | 0.001 | 0.004 | 1.0000         | >500   | 90.8                     | 2.6       | 119.6                    | 2.7       | 103.2                   | 5.0       | 97.7                     | 48.7      | 89.5                     | 24.4      | 88.9                    | 9.0       |
| 3   | Acrinathrin       | 0.002 | 0.005 | 0.9980         | >500   | 111.3                    | 3.4       | 118.9                    | 0.7       | 71.1                    | 3.3       | 93.8                     | 18.9      | 96.8                     | 15.1      | 104.8                   | 20.3      |
| 4   | Alachlor          | 0.002 | 0.006 | 0.9985         | 94.7   | 112.6                    | 1.5       | 115.0                    | 2.0       | 101.1                   | 1.1       | 94.5                     | 19.1      | 96.3                     | 12.9      | 98.2                    | 7.1       |
| 5   | Aldrin            | 0.001 | 0.002 | 0.9990         | 75.6   | 90.2                     | 2.6       | 109.7                    | 9.4       | 105.2                   | 5.4       | 90.5                     | 8.1       | 84.9                     | 6.4       | 83.9                    | 4.9       |
|     | Dieldrin          | 0.001 | 0.003 | 0.9992         | 55.8   | 117.4                    | 1.4       | 118.4                    | 2.6       | 106.9                   | 3.5       | 93.2                     | 13.2      | 90.5                     | 15.8      | 89.6                    | 15.0      |
| 6   | Allidochlor       | 0.001 | 0.003 | 0.9975         | 103.8  | 67.8                     | 9.8       | 109.6                    | 12.8      | 95.2                    | 3.6       | 95.2                     | 17.2      | 97.6                     | 12.5      | 96.3                    | 6.5       |
| 7   | Ametryn           | 0.001 | 0.004 | 0.9988         | 187.4  | 116.3                    | 1.2       | 114.9                    | 1.0       | 104.1                   | 0.8       | 85.3                     | 23.2      | 94.9                     | 13.0      | 97.1                    | 8.2       |
| 8   | Anilofos          | 0.001 | 0.004 | 0.9984         | >500   | 82.1                     | 4.8       | 103.7                    | 4.8       | 100.0                   | 4.9       | 95.0                     | 17.4      | 91.1                     | 11.0      | 93.1                    | 6.7       |
| 9   | Aramite           | 0.001 | 0.002 | 0.9990         | 208.2  | 116.2                    | 2.0       | 109.9                    | 5.6       | 106.0                   | 1.9       | 101.9                    | 15.8      | 103.5                    | 11.7      | 102.0                   | 10.3      |
| 10  | Aspon             | 0.001 | 0.002 | 0.9999         | 27.0   | 119.2                    | 1.4       | 118.2                    | 1.2       | 107.2                   | 1.5       | 89.3                     | 18.2      | 93.8                     | 12.9      | 96.2                    | 6.4       |
| 11  | Atrazine          | 0.001 | 0.004 | 0.9989         | 167.8  | 113.9                    | 1.4       | 112.2                    | 1.7       | 102.4                   | 2.2       | 91.0                     | 16.7      | 93.3                     | 13.5      | 98.5                    | 7.5       |
| 12  | Azaconazole       | 0.002 | 0.007 | 0.9989         | 6.8    | 112.5                    | 1.1       | 113.1                    | 3.2       | 103.7                   | 1.3       | 98.0                     | 12.8      | 97.8                     | 7.3       | 98.7                    | 4.2       |
| 13  | Benfluralin       | 0.002 | 0.007 | 0.9964         | 127.5  | 116.6                    | 0.6       | 117.0                    | 4.3       | 102.5                   | 2.0       | 89.6                     | 22.7      | 94.1                     | 11.1      | 98.3                    | 6.5       |
| 14  | Benfuresate       | 0.001 | 0.002 | 0.9986         | 81.3   | 118.2                    | 0.7       | 113.6                    | 2.6       | 103.3                   | 2.0       | 93.4                     | 15.8      | 94.8                     | 13.2      | 98.5                    | 7.2       |
| 15  | Benodanil         | 0.002 | 0.005 | 0.9988         | 319.9  | 119.0                    | 0.6       | 115.7                    | 3.2       | 102.9                   | 1.9       | 93.2                     | 11.6      | 95.0                     | 11.7      | 101.1                   | 9.7       |
| 16  | Benzoylprop-ethyl | 0.001 | 0.002 | 0.9991         | 138.0  | 116.6                    | 1.0       | 117.3                    | 1.6       | 108.5                   | 1.1       | 96.8                     | 13.2      | 97.3                     | 10.4      | 100.1                   | 6.0       |
| 17  | BHC, $\alpha$ -   | 0.001 | 0.002 | 0.9989         | 69.6   | 108.0                    | 7.1       | 107.0                    | 12.5      | 102.3                   | 1.4       | 92.7                     | 13.8      | 93.1                     | 7.2       | 92.0                    | 1.7       |
|     | BHC, $\beta$ -    | 0.001 | 0.003 | 0.9991         | 50.5   | 101.9                    | 4.0       | 116.7                    | 2.9       | 108.8                   | 3.3       | 90.1                     | 21.3      | 91.8                     | 8.9       | 92.7                    | 1.1       |

| No. | Analyte               | LOD   | LOQ   | R <sup>2</sup> | ME.(%) | Repeatability (n=5)      |           |                          |           |                         |           | Reproducibility (n=11)   |           |                          |           |                         |           |
|-----|-----------------------|-------|-------|----------------|--------|--------------------------|-----------|--------------------------|-----------|-------------------------|-----------|--------------------------|-----------|--------------------------|-----------|-------------------------|-----------|
|     |                       |       |       |                |        | 0.01 mg kg <sup>-1</sup> |           | 0.02 mg kg <sup>-1</sup> |           | 0.1 mg kg <sup>-1</sup> |           | 0.01 mg kg <sup>-1</sup> |           | 0.02 mg kg <sup>-1</sup> |           | 0.1 mg kg <sup>-1</sup> |           |
|     |                       |       |       |                |        | Rec.<br>(%)              | CV<br>(%) | Rec.<br>(%)              | CV<br>(%) | Rec.<br>(%)             | CV<br>(%) | Rec.<br>(%)              | CV<br>(%) | Rec.<br>(%)              | CV<br>(%) | Rec.<br>(%)             | CV<br>(%) |
|     | BHC, $\delta$ -       | 0.001 | 0.002 | 0.9989         | 60.7   | 87.0                     | 5.4       | 101.1                    | 3.3       | 82.0                    | 2.0       | 97.1                     | 8.5       | 93.9                     | 7.7       | 92.2                    | 1.6       |
| 18  | BHC, $\gamma$ -       | 0.001 | 0.003 | 0.9978         | 53.7   | 89.8                     | 5.1       | 97.4                     | 13.9      | 102.9                   | 2.2       | 91.5                     | 15.1      | 82.2                     | 1.6       | 85.0                    | 7.3       |
| 19  | Bifenox               | 0.001 | 0.003 | 0.9973         | 352.8  | 119.9                    | 1.6       | 115.9                    | 1.0       | 86.6                    | 3.3       | 97.2                     | 21.8      | 100.8                    | 7.8       | 101.2                   | 2.0       |
| 20  | Bifenthrin            | 0.001 | 0.002 | 0.9990         | 218.7  | 113.1                    | 1.1       | 116.4                    | 2.7       | 108.8                   | 1.2       | 94.0                     | 14.1      | 92.4                     | 11.8      | 94.2                    | 8.3       |
| 21  | Boscalid              | 0.001 | 0.002 | 0.9987         | 489.4  | 117.1                    | 1.0       | 117.7                    | 3.8       | 106.2                   | 1.0       | 95.5                     | 14.3      | 97.7                     | 12.1      | 103.3                   | 11.4      |
| 22  | Bromobutide           | 0.001 | 0.003 | 0.9987         | 79.5   | 112.5                    | 2.2       | 113.9                    | 2.8       | 103.7                   | 0.3       | 94.4                     | 21.9      | 94.4                     | 18.0      | 98.7                    | 9.0       |
| 23  | Bromophos-methyl      | 0.001 | 0.002 | 0.9985         | 178.7  | 111.7                    | 3.1       | 118.5                    | 1.3       | 104.4                   | 2.1       | 93.0                     | 9.7       | 91.1                     | 6.1       | 90.8                    | 1.4       |
| 24  | Bromophos-ethyl       | 0.002 | 0.005 | 0.9991         | 157.9  | 111.5                    | 2.8       | 118.8                    | 0.9       | 96.5                    | 2.1       | 91.4                     | 10.9      | 91.9                     | 9.0       | 93.2                    | 2.7       |
| 25  | Bromopropylate        | 0.001 | 0.002 | 0.9989         | 399.5  | 116.6                    | 0.8       | 118.5                    | 3.3       | 109.0                   | 1.8       | 93.8                     | 14.5      | 94.9                     | 11.5      | 98.1                    | 9.0       |
| 26  | Bupirimate            | 0.002 | 0.005 | 0.9992         | 162.6  | 117.0                    | 0.9       | 114.6                    | 4.9       | 109.9                   | 0.5       | 91.4                     | 14.6      | 96.8                     | 10.5      | 99.3                    | 6.9       |
| 27  | Buprofezin            | 0.001 | 0.003 | 0.9991         | 112.0  | 115.8                    | 1.5       | 115.1                    | 5.1       | 108.9                   | 1.0       | 96.2                     | 15.0      | 97.7                     | 8.6       | 99.6                    | 5.9       |
| 28  | Butachlor             | 0.001 | 0.004 | 0.9991         | 147.8  | 113.1                    | 2.0       | 113.2                    | 2.3       | 95.4                    | 3.4       | 89.4                     | 17.8      | 90.0                     | 11.9      | 94.1                    | 9.6       |
| 29  | Butafenacil           | 0.001 | 0.002 | 0.9980         | >500   | 114.0                    | 1.0       | 119.5                    | 2.5       | 108.5                   | 2.1       | 100.0                    | 18.7      | 101.1                    | 15.3      | 104.2                   | 15.7      |
| 30  | Butralin              | 0.002 | 0.006 | 0.9976         | 189.0  | 118.4                    | 2.5       | 118.0                    | 4.0       | 97.0                    | 2.6       | 96.7                     | 13.7      | 91.4                     | 9.6       | 99.5                    | 8.1       |
| 31  | Butylate              | 0.002 | 0.006 | 0.9974         | 113.1  | 72.0                     | 7.4       | 117.1                    | 4.8       | 108.2                   | 7.4       | 97.2                     | 8.3       | 90.4                     | 3.6       | 95.9                    | 7.8       |
| 32  | Cadusafos             | 0.001 | 0.002 | 0.9986         | 219.2  | 108.5                    | 3.9       | 119.4                    | 3.0       | 106.2                   | 1.6       | 92.4                     | 20.2      | 94.6                     | 12.3      | 95.2                    | 5.6       |
| 33  | Carbophenothion       | 0.001 | 0.002 | 0.9988         | 308.0  | 117.8                    | 1.2       | 115.0                    | 2.8       | 104.5                   | 2.1       | 91.6                     | 12.6      | 93.3                     | 11.2      | 97.5                    | 10.2      |
| 34  | Carboxin              | 0.001 | 0.004 | 0.9990         | 212.6  | 109.0                    | 1.4       | 107.6                    | 5.0       | 101.2                   | 1.0       | 99.0                     | 11.8      | 96.9                     | 8.2       | 98.7                    | 7.5       |
| 35  | Carfentrazone-ethyl   | 0.001 | 0.002 | 0.9988         | 230.1  | 118.3                    | 1.6       | 114.3                    | 4.5       | 102.9                   | 1.6       | 126.0                    | 47.9      | 99.8                     | 36.6      | 85.3                    | 8.6       |
| 36  | Chinomethionat        | 0.001 | 0.002 | 0.9989         | 159.8  | 69.4                     | 9.3       | 75.9                     | 6.9       | 76.5                    | 2.2       | 57.3                     | 46.6      | 62.1                     | 49.2      | 63.7                    | 60.4      |
| 37  | Chlorbenside          | 0.001 | 0.003 | 0.9989         | 134.1  | 108.1                    | 3.8       | 116.5                    | 1.9       | 105.0                   | 1.4       | 83.9                     | 18.3      | 91.3                     | 9.3       | 93.6                    | 2.8       |
| 38  | Chlorbufam            | 0.001 | 0.002 | 0.9982         | 379.2  | 115.8                    | 2.2       | 117.7                    | 2.8       | 96.9                    | 4.0       | 92.3                     | 22.9      | 85.2                     | 5.1       | 91.4                    | 13.6      |
| 39  | Chlordane- <i>cis</i> | 0.001 | 0.003 | 0.9989         | 15.2   | 107.5                    | 1.2       | 119.3                    | 1.1       | 104.8                   | 1.8       | 93.1                     | 12.9      | 91.0                     | 9.3       | 92.3                    | 5.4       |

| No. | Analyte                 | LOD   | LOQ   | R <sup>2</sup> | ME.(%) | Repeatability (n=5)      |           |                          |           |                         |           | Reproducibility (n=11)   |           |                          |           |                         |           |
|-----|-------------------------|-------|-------|----------------|--------|--------------------------|-----------|--------------------------|-----------|-------------------------|-----------|--------------------------|-----------|--------------------------|-----------|-------------------------|-----------|
|     |                         |       |       |                |        | 0.01 mg kg <sup>-1</sup> |           | 0.02 mg kg <sup>-1</sup> |           | 0.1 mg kg <sup>-1</sup> |           | 0.01 mg kg <sup>-1</sup> |           | 0.02 mg kg <sup>-1</sup> |           | 0.1 mg kg <sup>-1</sup> |           |
|     |                         |       |       |                |        | Rec.<br>(%)              | CV<br>(%) | Rec.<br>(%)              | CV<br>(%) | Rec.<br>(%)             | CV<br>(%) | Rec.<br>(%)              | CV<br>(%) | Rec.<br>(%)              | CV<br>(%) | Rec.<br>(%)             | CV<br>(%) |
|     | Chlordane- <i>trans</i> | 0.001 | 0.003 | 0.9989         | 63.6   | 113.4                    | 1.8       | 118.8                    | 1.3       | 105.3                   | 0.7       | 91.7                     | 13.3      | 90.6                     | 9.7       | 92.0                    | 5.7       |
| 40  | Chlorethoxyfos          | 0.002 | 0.007 | 0.9982         | 61.6   | 91.7                     | 5.7       | 118.8                    | 4.3       | 108.6                   | 2.7       | 96.6                     | 20.6      | 98.4                     | 16.9      | 100.8                   | 13.1      |
| 41  | Chlorfenapyr            | 0.001 | 0.003 | 0.9988         | 172.8  | 114.0                    | 4.5       | 119.8                    | 5.2       | 107.1                   | 1.8       | 98.1                     | 14.1      | 100.5                    | 7.9       | 99.0                    | 4.6       |
| 42  | Chlorfenson             | 0.001 | 0.003 | 0.9990         | -76.8  | 111.3                    | 4.2       | 117.5                    | 2.0       | 110.9                   | 4.5       | 95.6                     | 12.2      | 98.0                     | 8.3       | 97.1                    | 5.6       |
| 43  | Chlorflurenol-methyl    | 0.001 | 0.002 | 0.9991         | 329.5  | 117.7                    | 0.5       | 117.9                    | 3.2       | 105.9                   | 4.9       | 95.5                     | 16.8      | 95.4                     | 13.0      | 97.7                    | 9.3       |
| 44  | Chlornitrofen           | 0.001 | 0.003 | 0.9986         | 221.8  | 118.6                    | 1.3       | 115.8                    | 3.6       | 101.8                   | 2.6       | 90.6                     | 13.4      | 93.8                     | 10.1      | 102.5                   | 6.7       |
| 45  | Chlorobenzilate         | 0.002 | 0.006 | 0.9993         | 167.2  | 112.5                    | 1.3       | 116.0                    | 3.2       | 109.4                   | 0.9       | 96.3                     | 12.8      | 97.4                     | 9.4       | 99.2                    | 5.4       |
| 46  | Chloropropylate         | 0.002 | 0.005 | 0.9993         | 160.4  | 81.6                     | 7.8       | 116.7                    | 4.2       | 106.8                   | 2.6       | 96.5                     | 12.9      | 101.9                    | 6.8       | 100.6                   | 5.0       |
| 47  | Chloroneb               | 0.001 | 0.002 | 0.9981         | 103.5  | 112.5                    | 1.3       | 116.0                    | 3.2       | 109.2                   | 0.6       | 91.4                     | 19.9      | 94.9                     | 14.8      | 97.3                    | 2.7       |
| 48  | Chlorothalonil          | 0.002 | 0.007 | 0.9962         | 323.0  | N.D.                     | N.D.      | N.D.                     | N.D.      | N.D.                    | N.D.      | 62.6                     | 57.6      | 33.9                     | 69.2      | 17.2                    | 66.5      |
| 49  | Chlorpropham            | 0.001 | 0.003 | 0.9983         | 222.8  | 109.9                    | 3.4       | 114.8                    | 1.2       | 106.8                   | 1.1       | 96.7                     | 20.9      | 94.4                     | 12.5      | 94.8                    | 9.0       |
| 50  | Chlorpyrifos            | 0.001 | 0.002 | 0.9987         | 132.7  | 118.4                    | 0.9       | 117.7                    | 1.3       | 100.3                   | 2.3       | 95.8                     | 12.2      | 94.3                     | 10.5      | 94.6                    | 5.0       |
| 51  | Chlorpyrifos-methyl     | 0.002 | 0.007 | 0.9983         | 134.4  | 101.7                    | 3.9       | 110.0                    | 1.4       | 95.3                    | 2.0       | 92.7                     | 15.1      | 93.6                     | 10.4      | 93.5                    | 4.3       |
| 52  | Chlorthal-dimethyl      | 0.001 | 0.002 | 0.9990         | 83.1   | 114.0                    | 1.4       | 119.0                    | 1.4       | 106.9                   | 1.3       | 93.4                     | 11.5      | 95.9                     | 9.4       | 98.2                    | 3.4       |
| 53  | Chlorthion              | 0.001 | 0.002 | 0.9979         | >500   | 98.5                     | 4.3       | 100.9                    | 3.5       | 84.5                    | 4.3       | 104.7                    | 4.3       | 99.7                     | 7.5       | 99.8                    | 10.2      |
| 54  | Chlorthiophos           | 0.001 | 0.002 | 0.9989         | 210.7  | 115.3                    | 2.8       | 118.4                    | 3.6       | 104.8                   | 1.6       | 94.2                     | 11.8      | 94.2                     | 9.6       | 96.4                    | 6.5       |
| 55  | Chlozolinate            | 0.001 | 0.002 | 0.9990         | 92.9   | 114.8                    | 1.8       | 115.0                    | 2.3       | 96.4                    | 2.0       | 83.1                     | 15.0      | 87.8                     | 11.2      | 93.7                    | 4.9       |
| 56  | Cinmethylin             | 0.002 | 0.007 | 0.9948         | 92.4   | 109.5                    | 11.4      | 119.0                    | 5.5       | 106.0                   | 5.2       | 88.8                     | 23.2      | 95.1                     | 12.2      | 95.9                    | 5.9       |
| 57  | Clomazone               | 0.002 | 0.005 | 0.9986         | 120.9  | 111.0                    | 3.7       | 118.2                    | 2.2       | 104.2                   | 2.4       | 93.3                     | 17.4      | 96.4                     | 12.8      | 97.8                    | 6.4       |
| 58  | Coumaphos               | 0.001 | 0.003 | 0.9975         | >500   | 102.3                    | 9.4       | 109.2                    | 13.1      | 88.7                    | 0.6       | 107.2                    | 10.8      | 101.1                    | 10.8      | 98.3                    | 17.1      |
| 59  | Cyanophos               | 0.001 | 0.003 | 0.9984         | 185.3  | 114.1                    | 1.3       | 120.0                    | 1.5       | 100.3                   | 2.7       | 102.4                    | 7.4       | 96.5                     | 7.7       | 96.6                    | 5.5       |
| 60  | Cyflufenamid            | 0.001 | 0.004 | 0.9991         | 255.6  | 109.3                    | 0.9       | 117.7                    | 4.2       | 111.0                   | 0.5       | 94.9                     | 19.5      | 96.3                     | 12.5      | 99.2                    | 8.3       |
| 61  | Cyfluthrin              | 0.001 | 0.002 | 0.9987         | >500   | 108.5                    | 5.2       | 70.2                     | 11.8      | 71.9                    | 2.5       | 90.9                     | 24.8      | 94.0                     | 17.8      | 100.5                   | 23.4      |

| No. | Analyte                  | LOD   | LOQ   | R <sup>2</sup> | ME.(%) | Repeatability (n=5)      |           |                          |           |                         |           | Reproducibility (n=11)   |           |                          |           |                         |           |
|-----|--------------------------|-------|-------|----------------|--------|--------------------------|-----------|--------------------------|-----------|-------------------------|-----------|--------------------------|-----------|--------------------------|-----------|-------------------------|-----------|
|     |                          |       |       |                |        | 0.01 mg kg <sup>-1</sup> |           | 0.02 mg kg <sup>-1</sup> |           | 0.1 mg kg <sup>-1</sup> |           | 0.01 mg kg <sup>-1</sup> |           | 0.02 mg kg <sup>-1</sup> |           | 0.1 mg kg <sup>-1</sup> |           |
|     |                          |       |       |                |        | Rec.<br>(%)              | CV<br>(%) | Rec.<br>(%)              | CV<br>(%) | Rec.<br>(%)             | CV<br>(%) | Rec.<br>(%)              | CV<br>(%) | Rec.<br>(%)              | CV<br>(%) | Rec.<br>(%)             | CV<br>(%) |
| 62  | Cyhalofop-butyl          | 0.001 | 0.002 | 0.9986         | 439.8  | 117.1                    | 2.4       | 118.7                    | 2.8       | 106.8                   | 2.7       | 95.9                     | 18.5      | 97.7                     | 13.8      | 100.8                   | 12.9      |
| 63  | Cyhalothrin, $\gamma$ -  | 0.001 | 0.003 | 0.9991         | >500   | 107.9                    | 6.0       | 84.7                     | 6.1       | 81.8                    | 2.5       | 89.1                     | 24.7      | 101.6                    | 18.6      | 109.5                   | 23.3      |
|     | Cyhalothrin, $\lambda$ - | 0.001 | 0.002 | 0.9983         | >500   | 111.8                    | 3.0       | 78.8                     | 6.5       | 71.6                    | 2.6       | 98.2                     | 17.2      | 97.4                     | 18.3      | 106.8                   | 25.1      |
| 64  | Cypermethrin             | 0.001 | 0.003 | 0.9985         | >500   | 105.2                    | 6.3       | 70.5                     | 5.9       | 71.0                    | 3.1       | 95.6                     | 18.0      | 95.3                     | 14.9      | 104.1                   | 18.4      |
| 65  | Cyprazine                | 0.001 | 0.004 | 0.9988         | 73.3   | 119.4                    | 0.7       | 117.5                    | 2.1       | 100.2                   | 2.4       | 86.9                     | 20.9      | 91.6                     | 16.2      | 97.0                    | 8.4       |
| 66  | Cyprodinil               | 0.001 | 0.002 | 0.9989         | 137.5  | 117.6                    | 2.4       | 116.0                    | 0.7       | 101.1                   | 2.0       | 96.6                     | 17.2      | 93.5                     | 9.8       | 95.1                    | 5.3       |
| 67  | DDD, $p,p'$ -            | 0.001 | 0.002 | 0.9990         | 110.8  | 102.5                    | 2.1       | 111.6                    | 2.5       | 108.5                   | 0.6       | 91.8                     | 15.5      | 91.2                     | 10.2      | 92.1                    | 5.8       |
|     | DDE, $p,p'$ -            | 0.001 | 0.004 | 0.9990         | 86.6   | 106.0                    | 1.9       | 108.8                    | 2.6       | 104.5                   | 2.0       | 83.8                     | 16.1      | 87.3                     | 20.8      | 84.2                    | 11.2      |
|     | DDT, $o,p'$ -            | 0.001 | 0.003 | 0.9992         | -22.2  | 115.4                    | 5.9       | 109.8                    | 2.2       | 101.1                   | 2.3       | 110.7                    | 17.7      | 99.8                     | 12.0      | 93.4                    | 5.4       |
|     | DDT, $p,p'$ -            | 0.001 | 0.004 | 0.9982         | -9.3   | 106.5                    | 1.7       | 104.6                    | 3.2       | 97.9                    | 1.6       | 123.2                    | 33.4      | 104.0                    | 18.3      | 93.4                    | 10.0      |
| 68  | Deltamethrin             | 0.001 | 0.002 | 0.9991         | >500   | 105.4                    | 7.3       | 70.2                     | 6.4       | 75.5                    | 4.0       | 83.8                     | 21.0      | 75.5                     | 25.4      | 72.7                    | 4.4       |
| 69  | Desmetryn                | 0.002 | 0.005 | 0.9988         | 133.4  | 117.6                    | 0.3       | 116.6                    | 4.6       | 102.2                   | 2.8       | 97.8                     | 15.1      | 102.1                    | 12.6      | 102.7                   | 9.6       |
| 70  | Dialifor                 | 0.001 | 0.004 | 0.9980         | 404.0  | 115.0                    | 3.0       | 105.9                    | 5.5       | 91.4                    | 1.9       | 105.7                    | 9.9       | 102.8                    | 10.1      | 104.5                   | 13.9      |
| 71  | Di-Allate                | 0.001 | 0.004 | 0.9977         | 102.3  | 107.8                    | 8.1       | 115.3                    | 5.4       | 103.7                   | 2.4       | 93.7                     | 16.7      | 97.9                     | 9.9       | 94.8                    | 3.6       |
| 72  | Diazinon                 | 0.001 | 0.002 | 0.9983         | 111.3  | 115.5                    | 2.9       | 119.7                    | 0.8       | 106.7                   | 1.0       | 96.1                     | 13.8      | 99.9                     | 9.4       | 99.1                    | 6.1       |
| 73  | Dichlobenil              | 0.002 | 0.007 | 0.9981         | 65.5   | 95.1                     | 10.6      | 115.0                    | 5.9       | 108.1                   | 0.6       | 97.8                     | 12.5      | 99.5                     | 10.1      | 96.8                    | 3.6       |
| 74  | Dichlofenthion           | 0.002 | 0.006 | 0.9980         | 116.8  | 119.5                    | 0.7       | 117.7                    | 4.2       | 107.5                   | 1.3       | 91.7                     | 16.2      | 94.4                     | 10.7      | 94.9                    | 4.9       |
| 75  | Dichlofluanid            | 0.002 | 0.005 | 0.9218         | 137.0  | 116.3                    | 7.9       | 111.2                    | 5.9       | 81.6                    | 7.3       | 58.0                     | 74.7      | 47.7                     | 98.3      | 77.7                    | 87.2      |
| 76  | Dichlormid               | 0.001 | 0.002 | 1.0000         | 100.1  | 98.3                     | 6.4       | 116.8                    | 3.8       | 103.3                   | 4.0       | 97.6                     | 19.4      | 99.8                     | 13.7      | 99.3                    | 7.8       |
| 77  | Diclobutrazol            | 0.001 | 0.003 | 0.9990         | >500   | 116.2                    | 1.3       | 111.0                    | 6.1       | 110.0                   | 0.9       | 91.7                     | 16.9      | 94.2                     | 10.4      | 100.3                   | 11.3      |
| 78  | Diclofop-methyl          | 0.001 | 0.003 | 0.9990         | 183.2  | 116.1                    | 1.4       | 113.7                    | 3.4       | 104.1                   | 1.7       | 92.7                     | 16.0      | 95.1                     | 11.6      | 96.7                    | 9.9       |
| 79  | Dicloran                 | 0.001 | 0.002 | 0.9983         | 177.9  | 115.5                    | 2.2       | 117.7                    | 1.6       | 100.0                   | 2.0       | 93.0                     | 14.8      | 96.2                     | 11.0      | 104.8                   | 2.7       |
| 80  | Dicofol                  | 0.001 | 0.002 | 0.9976         | 47.3   | 114.0                    | 1.0       | 119.3                    | 4.1       | 103.7                   | 3.1       | 89.8                     | 23.2      | 87.5                     | 19.1      | 92.9                    | 6.9       |

| No. | Analyte                | LOD   | LOQ   | R <sup>2</sup> | ME.(%) | Repeatability (n=5)      |           |                          |           |                         |           | Reproducibility (n=11)   |           |                          |           |                         |           |
|-----|------------------------|-------|-------|----------------|--------|--------------------------|-----------|--------------------------|-----------|-------------------------|-----------|--------------------------|-----------|--------------------------|-----------|-------------------------|-----------|
|     |                        |       |       |                |        | 0.01 mg kg <sup>-1</sup> |           | 0.02 mg kg <sup>-1</sup> |           | 0.1 mg kg <sup>-1</sup> |           | 0.01 mg kg <sup>-1</sup> |           | 0.02 mg kg <sup>-1</sup> |           | 0.1 mg kg <sup>-1</sup> |           |
|     |                        |       |       |                |        | Rec.<br>(%)              | CV<br>(%) | Rec.<br>(%)              | CV<br>(%) | Rec.<br>(%)             | CV<br>(%) | Rec.<br>(%)              | CV<br>(%) | Rec.<br>(%)              | CV<br>(%) | Rec.<br>(%)             | CV<br>(%) |
| 81  | Dicrotophos            | 0.002 | 0.006 | 0.9984         | >500   | 108.3                    | 2.7       | 98.6                     | 2.9       | 73.2                    | 3.2       | 105.0                    | 11.9      | 107.3                    | 3.5       | 95.0                    | 12.8      |
| 82  | Diethatyl-ethyl        | 0.001 | 0.002 | 0.9993         | -16.6  | 119.0                    | 1.9       | 112.1                    | 2.9       | 101.0                   | 4.1       | 91.3                     | 17.4      | 94.9                     | 14.3      | 97.6                    | 10.1      |
| 83  | Diethofencarb          | 0.002 | 0.007 | 0.9986         | 464.5  | 117.7                    | 0.6       | 118.4                    | 0.8       | 101.7                   | 5.0       | 91.5                     | 17.4      | 94.0                     | 15.5      | 97.9                    | 10.6      |
| 84  | Difenoconazole         | 0.002 | 0.005 | 0.9982         | >500   | 106.8                    | 10.1      | 117.2                    | 8.2       | 112.1                   | 0.8       | 99.6                     | 19.2      | 102.4                    | 14.4      | 104.8                   | 12.1      |
| 85  | Diflufenican           | 0.001 | 0.002 | 0.9989         | 371.3  | 118.9                    | 2.1       | 118.9                    | 4.0       | 107.4                   | 2.1       | 93.7                     | 16.4      | 96.2                     | 12.6      | 97.3                    | 11.2      |
| 86  | Dimepiperate           | 0.001 | 0.002 | 0.9992         | 148.1  | 117.8                    | 0.7       | 119.2                    | 3.7       | 106.5                   | 2.4       | 96.2                     | 16.5      | 93.2                     | 10.5      | 96.1                    | 6.8       |
| 87  | Dimethachlor           | 0.001 | 0.003 | 0.9986         | 88.6   | 103.2                    | 2.4       | 115.6                    | 0.4       | 94.9                    | 0.9       | 93.8                     | 15.8      | 95.6                     | 12.2      | 99.0                    | 6.0       |
| 88  | Dimethametryn          | 0.001 | 0.002 | 0.9985         | -17.9  | 119.6                    | 0.7       | 119.2                    | 1.3       | 101.5                   | 2.9       | 85.3                     | 19.7      | 92.6                     | 12.6      | 95.4                    | 7.9       |
| 89  | Dimethenamid           | 0.002 | 0.005 | 0.9986         | 89.7   | 110.6                    | 0.8       | 117.1                    | 1.1       | 100.3                   | 0.8       | 95.0                     | 15.5      | 96.6                     | 10.7      | 98.1                    | 5.9       |
| 90  | Dimethipin             | 0.001 | 0.002 | 0.9988         | 129.5  | 72.4                     | 12.1      | 72.4                     | 4.6       | 74.2                    | 2.4       | 104.3                    | 3.8       | 99.7                     | 1.8       | 96.4                    | 1.4       |
| 91  | Dimethomorph (E)       | 0.001 | 0.002 | 0.9978         | >500   | 118.9                    | 1.3       | 118.0                    | 0.4       | 110.3                   | 2.0       | 96.5                     | 19.3      | 99.5                     | 17.1      | 102.4                   | 15.0      |
|     | Dimethomorph (Z)       | 0.001 | 0.003 | 0.9982         | >500   | 112.5                    | 1.7       | 118.7                    | 2.7       | 111.8                   | 1.7       | 102.4                    | 15.5      | 104.3                    | 13.0      | 105.6                   | 12.2      |
| 92  | Dimethylvinphos (E)    | 0.002 | 0.005 | 0.9990         | 343.8  | 78.5                     | 2.0       | 100.7                    | 3.9       | 71.2                    | 3.6       | 102.3                    | 8.0       | 97.8                     | 10.9      | 95.7                    | 9.3       |
|     | Dimethylvinphos (Z)    | 0.001 | 0.003 | 0.9988         | 450.7  | 68.2                     | 4.1       | 97.1                     | 2.9       | 96.6                    | 4.3       | 96.6                     | 12.4      | 94.7                     | 13.5      | 93.9                    | 10.7      |
| 93  | Diniconazole           | 0.001 | 0.004 | 0.9990         | >500   | 119.8                    | 0.7       | 113.7                    | 4.7       | 108.4                   | 1.9       | 92.8                     | 17.1      | 95.9                     | 10.3      | 99.8                    | 10.8      |
| 94  | Dinitramine            | 0.001 | 0.002 | 0.9972         | 168.0  | 119.4                    | 1.8       | 117.3                    | 1.2       | 101.8                   | 3.9       | 97.9                     | 17.5      | 98.1                     | 9.0       | 105.1                   | 6.9       |
| 95  | Dioxathion             | 0.001 | 0.002 | 0.9984         | 95.2   | 116.6                    | 1.2       | 119.7                    | 4.5       | 101.5                   | 1.5       | 102.1                    | 12.8      | 92.9                     | 4.3       | 92.5                    | 2.2       |
| 96  | Diphenamid             | 0.002 | 0.005 | 0.9991         | 91.8   | 118.6                    | 1.8       | 118.0                    | 2.3       | 101.1                   | 0.9       | 95.1                     | 15.1      | 96.7                     | 10.7      | 97.6                    | 7.0       |
| 97  | Diphenylamine          | 0.001 | 0.004 | 0.9977         | 160.4  | 100.5                    | 6.9       | 118.3                    | 3.2       | 105.2                   | 1.1       | 90.0                     | 22.4      | 93.4                     | 16.9      | 93.4                    | 6.9       |
| 98  | Dithiopyr              | 0.001 | 0.002 | 0.9986         | 85.9   | 115.6                    | 1.1       | 119.7                    | 0.4       | 105.4                   | 1.4       | 90.0                     | 18.6      | 94.6                     | 12.6      | 96.7                    | 5.9       |
| 99  | Edifenphos             | 0.002 | 0.005 | 0.9991         | >500   | 104.1                    | 11.3      | 91.0                     | 1.0       | 82.1                    | 2.1       | 102.2                    | 20.0      | 98.7                     | 24.6      | 104.8                   | 19.6      |
| 100 | Endosulfan, $\alpha$ - | 0.001 | 0.003 | 0.9993         | -31.0  | 112.3                    | 0.5       | 119.3                    | 0.4       | 105.5                   | 2.5       | 87.5                     | 26.1      | 93.2                     | 16.5      | 96.9                    | 5.2       |
|     | Endosulfan, $\beta$ -  | 0.001 | 0.002 | 0.9991         | 46.6   | 108.4                    | 1.3       | 114.0                    | 3.3       | 104.4                   | 1.2       | 89.2                     | 16.6      | 92.2                     | 11.0      | 96.3                    | 3.0       |

| No. | Analyte              | LOD   | LOQ   | R <sup>2</sup> | ME.(%) | Repeatability (n=5)      |           |                          |           |                         |           | Reproducibility (n=11)   |           |                          |           |                         |           |
|-----|----------------------|-------|-------|----------------|--------|--------------------------|-----------|--------------------------|-----------|-------------------------|-----------|--------------------------|-----------|--------------------------|-----------|-------------------------|-----------|
|     |                      |       |       |                |        | 0.01 mg kg <sup>-1</sup> |           | 0.02 mg kg <sup>-1</sup> |           | 0.1 mg kg <sup>-1</sup> |           | 0.01 mg kg <sup>-1</sup> |           | 0.02 mg kg <sup>-1</sup> |           | 0.1 mg kg <sup>-1</sup> |           |
|     |                      |       |       |                |        | Rec.<br>(%)              | CV<br>(%) | Rec.<br>(%)              | CV<br>(%) | Rec.<br>(%)             | CV<br>(%) | Rec.<br>(%)              | CV<br>(%) | Rec.<br>(%)              | CV<br>(%) | Rec.<br>(%)             | CV<br>(%) |
|     | Endosulfan, sulfate- | 0.001 | 0.002 | 0.9991         | 113.7  | 102.9                    | 1.0       | 107.0                    | 2.9       | 90.1                    | 0.7       | 89.6                     | 18.2      | 85.5                     | 5.3       | 86.7                    | 4.7       |
| 101 | Endrin               | 0.001 | 0.003 | 0.9991         | 74.9   | 110.1                    | 2.4       | 118.5                    | 2.8       | 93.1                    | 0.2       | 81.5                     | 23.6      | 85.4                     | 18.2      | 92.3                    | 8.3       |
|     | δ-keto-Endrin        | 0.001 | 0.003 | 0.9986         | 40.1   | 112.7                    | 4.7       | 107.0                    | 3.9       | 106.2                   | 1.3       | 103.1                    | 15.4      | 91.5                     | 11.1      | 90.7                    | 5.3       |
| 102 | EPN                  | 0.001 | 0.003 | 0.9982         | 377.3  | 118.9                    | 0.4       | 116.2                    | 4.2       | 96.4                    | 2.6       | 96.3                     | 16.4      | 96.5                     | 10.1      | 106.3                   | 10.9      |
| 103 | Epoxiconazole        | 0.001 | 0.002 | 0.9989         | 194.5  | 118.3                    | 0.2       | 119.0                    | 3.3       | 105.7                   | 0.9       | 93.1                     | 18.6      | 95.9                     | 12.9      | 100.9                   | 9.0       |
| 104 | EPTC                 | 0.002 | 0.007 | 0.9979         | 71.2   | 82.6                     | 6.0       | 110.4                    | 9.4       | 104.9                   | 3.2       | 104.8                    | 4.9       | 105.1                    | 6.6       | 99.7                    | 7.4       |
| 105 | Etaconazole-1        | 0.001 | 0.002 | 0.9991         | 159.8  | 118.6                    | 6.0       | 116.6                    | 2.9       | 104.6                   | 1.7       | 99.8                     | 18.0      | 99.6                     | 9.7       | 100.4                   | 6.5       |
|     | Etaconazole-2        | 0.001 | 0.002 | 0.9992         | 105.0  | 119.6                    | 1.8       | 115.6                    | 2.4       | 106.0                   | 1.0       | 93.9                     | 16.7      | 99.6                     | 11.9      | 99.8                    | 8.0       |
| 106 | Ethalfuralin         | 0.001 | 0.002 | 0.9969         | 139.2  | 110.9                    | 2.3       | 115.8                    | 8.1       | 99.6                    | 3.5       | 101.5                    | 16.2      | 94.6                     | 11.8      | 100.4                   | 7.4       |
| 107 | Ethion               | 0.001 | 0.002 | 0.9988         | 275.6  | 118.8                    | 0.9       | 113.3                    | 4.7       | 107.1                   | 1.9       | 99.2                     | 15.7      | 97.2                     | 10.9      | 99.7                    | 9.8       |
| 108 | Ethofumesate         | 0.001 | 0.004 | 0.9990         | 108.3  | 119.7                    | 2.0       | 116.3                    | 0.9       | 103.1                   | 1.0       | 94.4                     | 17.1      | 96.3                     | 12.1      | 98.1                    | 6.1       |
| 109 | Ethoprophos          | 0.001 | 0.002 | 0.9978         | 237.8  | 104.7                    | 1.4       | 118.1                    | 6.4       | 102.1                   | 3.9       | 92.7                     | 19.5      | 95.5                     | 11.6      | 95.0                    | 7.9       |
| 110 | Ethychlozate         | 0.001 | 0.002 | 0.9992         | 469.8  | 118.7                    | 1.1       | 111.4                    | 6.5       | 100.0                   | 5.1       | 90.1                     | 13.7      | 94.1                     | 12.6      | 98.0                    | 11.6      |
| 111 | Etiozazole           | 0.001 | 0.003 | 0.9987         | 253.1  | 119.1                    | 1.0       | 119.0                    | 0.6       | 108.1                   | 1.3       | 98.1                     | 10.0      | 99.7                     | 6.9       | 99.7                    | 9.3       |
| 112 | Etridiazole          | 0.002 | 0.006 | 0.9984         | 69.1   | 100.6                    | 10.8      | 117.0                    | 5.3       | 107.5                   | 8.5       | 106.2                    | 9.0       | 98.1                     | 13.8      | 98.3                    | 6.3       |
| 113 | Fenamidone           | 0.001 | 0.002 | 0.9987         | 177.4  | 118.7                    | 0.4       | 118.7                    | 1.7       | 108.2                   | 0.8       | 93.4                     | 13.3      | 97.8                     | 10.1      | 102.0                   | 6.9       |
| 114 | Fenarimol            | 0.001 | 0.002 | 0.9988         | 309.2  | 118.4                    | 0.3       | 119.0                    | 1.0       | 103.2                   | 1.3       | 95.5                     | 11.5      | 98.8                     | 7.9       | 102.4                   | 8.6       |
| 115 | Fenbuconazole        | 0.002 | 0.005 | 0.9988         | 451.2  | 116.7                    | 0.2       | 116.6                    | 1.7       | 109.8                   | 1.3       | 95.4                     | 13.6      | 100.8                    | 9.9       | 103.7                   | 9.3       |
| 116 | Fenchlorphos         | 0.002 | 0.005 | 0.9985         | 144.4  | 107.3                    | 1.9       | 116.3                    | 2.3       | 99.2                    | 1.4       | 86.3                     | 21.1      | 92.6                     | 9.0       | 93.4                    | 4.3       |
| 117 | Fenclorim            | 0.001 | 0.002 | 0.9987         | 140.2  | 103.5                    | 0.5       | 119.8                    | 6.6       | 108.4                   | 4.0       | 94.0                     | 12.6      | 92.9                     | 11.5      | 90.7                    | 3.7       |
| 118 | Fenfuram             | 0.001 | 0.002 | 0.9985         | 144.8  | 113.8                    | 1.1       | 119.7                    | 1.8       | 100.9                   | 4.5       | 93.2                     | 16.2      | 95.1                     | 10.8      | 94.2                    | 6.7       |
| 119 | Fenitrothion         | 0.001 | 0.003 | 0.9980         | 401.1  | 119.9                    | 1.5       | 114.8                    | 5.4       | 95.6                    | 3.5       | 97.2                     | 12.5      | 94.2                     | 8.8       | 96.3                    | 5.7       |
| 120 | Fenobucarb           | 0.001 | 0.003 | 0.9983         | 233.0  | 102.2                    | 16.8      | 86.4                     | 5.3       | 70.9                    | 2.8       | 94.3                     | 14.8      | 93.0                     | 14.4      | 94.8                    | 9.0       |

| No. | Analyte            | LOD   | LOQ   | R <sup>2</sup> | ME.(%) | Repeatability (n=5)      |           |                          |           |                         |           | Reproducibility (n=11)   |           |                          |           |                         |           |
|-----|--------------------|-------|-------|----------------|--------|--------------------------|-----------|--------------------------|-----------|-------------------------|-----------|--------------------------|-----------|--------------------------|-----------|-------------------------|-----------|
|     |                    |       |       |                |        | 0.01 mg kg <sup>-1</sup> |           | 0.02 mg kg <sup>-1</sup> |           | 0.1 mg kg <sup>-1</sup> |           | 0.01 mg kg <sup>-1</sup> |           | 0.02 mg kg <sup>-1</sup> |           | 0.1 mg kg <sup>-1</sup> |           |
|     |                    |       |       |                |        | Rec.<br>(%)              | CV<br>(%) | Rec.<br>(%)              | CV<br>(%) | Rec.<br>(%)             | CV<br>(%) | Rec.<br>(%)              | CV<br>(%) | Rec.<br>(%)              | CV<br>(%) | Rec.<br>(%)             | CV<br>(%) |
| 121 | Fenothiocarb       | 0.001 | 0.002 | 0.9992         | 217.3  | 116.8                    | 1.3       | 119.6                    | 3.2       | 103.6                   | 6.0       | 88.8                     | 20.1      | 93.9                     | 15.8      | 96.5                    | 10.6      |
| 122 | Fenoxanil          | 0.002 | 0.007 | 0.9992         | >500   | 110.3                    | 4.0       | 72.6                     | 8.5       | 71.8                    | 4.2       | 84.9                     | 21.5      | 87.3                     | 20.1      | 94.7                    | 12.5      |
| 123 | Fenpropathrin      | 0.002 | 0.006 | 0.9986         | 206.4  | 116.4                    | 1.0       | 112.7                    | 4.5       | 101.7                   | 1.7       | 98.2                     | 10.7      | 98.4                     | 7.6       | 102.3                   | 7.4       |
| 124 | Fenpropimorph      | 0.001 | 0.002 | 0.9990         | 154.0  | 117.7                    | 1.2       | 118.2                    | 2.6       | 103.2                   | 3.1       | 89.2                     | 13.1      | 95.4                     | 9.4       | 97.2                    | 5.1       |
| 125 | Fenpyrazamine      | 0.001 | 0.003 | 0.9979         | >500   | 110.9                    | 4.0       | 87.0                     | 7.9       | 77.0                    | 2.2       | 96.7                     | 17.5      | 96.8                     | 14.6      | 99.5                    | 15.7      |
| 126 | Fenson             | 0.001 | 0.003 | 0.9989         | 70.0   | 117.6                    | 3.6       | 116.2                    | 1.9       | 104.5                   | 2.4       | 94.5                     | 10.7      | 96.0                     | 10.1      | 97.3                    | 5.9       |
| 127 | Fenthion           | 0.001 | 0.002 | 0.9986         | 170.5  | 119.9                    | 1.2       | 119.3                    | 1.7       | 101.9                   | 2.1       | 96.7                     | 12.5      | 95.3                     | 10.1      | 96.0                    | 5.8       |
| 128 | Fenvalerate-1      | 0.001 | 0.002 | 0.9984         | >500   | 109.2                    | 3.6       | 70.6                     | 2.4       | 107.9                   | 3.7       | 100.7                    | 18.8      | 101.8                    | 12.5      | 107.7                   | 16.3      |
|     | Fenvalerate-2      | 0.001 | 0.002 | 0.9981         | >500   | 113.2                    | 4.8       | 71.3                     | 5.6       | 107.5                   | 3.5       | 96.7                     | 19.8      | 99.2                     | 13.6      | 108.8                   | 17.5      |
| 129 | Fipronil           | 0.001 | 0.002 | 0.9984         | 434.0  | 118.4                    | 1.9       | 118.0                    | 1.7       | 99.8                    | 6.3       | 95.9                     | 21.7      | 94.7                     | 16.0      | 99.0                    | 14.0      |
| 130 | Flamprop-isopropyl | 0.001 | 0.002 | 0.9993         | 118.3  | 118.1                    | 2.3       | 118.9                    | 2.9       | 108.9                   | 0.6       | 98.9                     | 15.7      | 101.9                    | 7.6       | 100.6                   | 5.2       |
| 131 | Fluacrypyrim       | 0.001 | 0.002 | 0.9991         | 267.6  | 119.1                    | 0.4       | 118.8                    | 3.1       | 110.7                   | 1.1       | 96.0                     | 14.1      | 96.7                     | 12.6      | 100.8                   | 8.2       |
| 132 | Fluazifop-butyl    | 0.001 | 0.002 | 0.9991         | 265.3  | 119.8                    | 0.4       | 116.5                    | 4.0       | 108.6                   | 1.2       | 96.7                     | 14.1      | 99.9                     | 9.3       | 99.9                    | 7.6       |
| 133 | Fluchloralin       | 0.001 | 0.002 | 0.9967         | 125.3  | 119.8                    | 2.0       | 109.8                    | 7.7       | 93.2                    | 3.1       | 97.2                     | 19.3      | 95.5                     | 13.9      | 99.7                    | 6.2       |
| 134 | Flucythrinate-1    | 0.001 | 0.003 | 0.9985         | >500   | 111.9                    | 4.3       | 83.0                     | 8.2       | 82.8                    | 3.8       | 89.5                     | 24.6      | 101.6                    | 12.9      | 91.4                    | 17.8      |
|     | Flucythrinate-2    | 0.001 | 0.002 | 0.9982         | >500   | 103.4                    | 4.0       | 81.3                     | 8.7       | 73.2                    | 2.9       | 95.3                     | 19.4      | 100.2                    | 14.5      | 91.8                    | 18.5      |
| 135 | Fluensulfone       | 0.001 | 0.002 | 0.9980         | 189.9  | 103.9                    | 3.9       | 109.9                    | 2.0       | 103.4                   | 4.0       | 82.8                     | 28.2      | 91.4                     | 17.6      | 94.7                    | 10.3      |
| 136 | Flufenpyr-ethyl    | 0.001 | 0.002 | 0.9991         | 328.6  | 101.4                    | 5.1       | 81.5                     | 7.8       | 84.6                    | 0.6       | 97.4                     | 16.4      | 100.0                    | 8.4       | 100.5                   | 8.2       |
| 137 | Flumetralin        | 0.001 | 0.003 | 0.9985         | 165.6  | 119.4                    | 2.4       | 119.5                    | 2.5       | 96.5                    | 4.9       | 99.8                     | 21.9      | 98.3                     | 13.6      | 101.4                   | 7.7       |
| 138 | Flumioxazin        | 0.002 | 0.007 | 1.0000         | >500   | 118.3                    | 2.3       | 108.0                    | 2.9       | 100.0                   | 1.6       | 99.6                     | 14.8      | 94.7                     | 15.7      | 92.6                    | 8.4       |
| 139 | Fluopyram          | 0.001 | 0.002 | 0.9990         | 273.0  | 117.1                    | 2.6       | 119.9                    | 0.6       | 105.2                   | 5.8       | 94.0                     | 15.8      | 94.4                     | 16.1      | 98.3                    | 4.9       |
| 140 | Fluorochloridone   | 0.001 | 0.004 | 1.0000         | 138.8  | 110.3                    | 3.1       | 117.1                    | 3.6       | 104.7                   | 0.6       | 97.1                     | 15.5      | 93.1                     | 14.6      | 99.1                    | 12.4      |
| 141 | Fluquinconazole    | 0.002 | 0.006 | 1.0000         | 226.8  | 118.0                    | 3.4       | 117.7                    | 2.4       | 93.0                    | 2.4       | 98.5                     | 10.8      | 96.8                     | 8.8       | 100.2                   | 5.7       |

| No. | Analyte            | LOD   | LOQ   | R <sup>2</sup> | ME.(%) | Repeatability (n=5)      |           |                          |           |                         |           | Reproducibility (n=11)   |           |                          |           |                         |           |
|-----|--------------------|-------|-------|----------------|--------|--------------------------|-----------|--------------------------|-----------|-------------------------|-----------|--------------------------|-----------|--------------------------|-----------|-------------------------|-----------|
|     |                    |       |       |                |        | 0.01 mg kg <sup>-1</sup> |           | 0.02 mg kg <sup>-1</sup> |           | 0.1 mg kg <sup>-1</sup> |           | 0.01 mg kg <sup>-1</sup> |           | 0.02 mg kg <sup>-1</sup> |           | 0.1 mg kg <sup>-1</sup> |           |
|     |                    |       |       |                |        | Rec.<br>(%)              | CV<br>(%) | Rec.<br>(%)              | CV<br>(%) | Rec.<br>(%)             | CV<br>(%) | Rec.<br>(%)              | CV<br>(%) | Rec.<br>(%)              | CV<br>(%) | Rec.<br>(%)             | CV<br>(%) |
| 142 | Flusilazole        | 0.001 | 0.003 | 0.9992         | 154.8  | 118.4                    | 1.2       | 115.1                    | 4.8       | 109.2                   | 0.9       | 94.8                     | 14.0      | 97.5                     | 9.4       | 99.0                    | 6.1       |
| 143 | Flutianil          | 0.001 | 0.002 | 0.9983         | 369.0  | 118.9                    | 2.1       | 118.8                    | 3.4       | 108.5                   | 2.2       | 98.8                     | 14.3      | 100.4                    | 11.6      | 103.5                   | 11.9      |
| 144 | Fluvalinate-1      | 0.001 | 0.003 | 1.0000         | >500   | 95.7                     | 11.7      | 113.1                    | 5.7       | 74.9                    | 0.9       | 97.4                     | 27.0      | 93.7                     | 14.8      | 100.6                   | 17.6      |
|     | Fluvalinate-2      | 0.001 | 0.003 | 0.9979         | >500   | 91.5                     | 7.2       | 115.2                    | 2.9       | 75.3                    | 3.3       | 93.3                     | 27.3      | 91.5                     | 11.3      | 99.8                    | 16.6      |
| 145 | Fluxapyroxad       | 0.002 | 0.007 | 0.9989         | >500   | 119.8                    | 2.3       | 116.1                    | 2.9       | 109.3                   | 1.2       | 94.3                     | 10.4      | 95.8                     | 10.5      | 99.7                    | 8.8       |
| 146 | Fonofos            | 0.001 | 0.002 | 0.9976         | 108.6  | 116.2                    | 0.1       | 118.9                    | 1.6       | 105.4                   | 3.0       | 98.0                     | 14.4      | 96.9                     | 11.2      | 97.0                    | 4.4       |
| 147 | Formothion         | 0.002 | 0.005 | 0.9983         | >500   | 71.2                     | 7.4       | 91.3                     | 3.3       | 87.7                    | 4.5       | 85.5                     | 13.5      | 78.4                     | 9.1       | 81.6                    | 7.0       |
| 148 | Fthalide           | 0.001 | 0.002 | 0.9994         | 95.3   | 95.3                     | 1.0       | 117.8                    | 3.2       | 93.3                    | 4.1       | 93.8                     | 10.4      | 95.1                     | 8.5       | 96.8                    | 4.9       |
| 149 | Halfenprox         | 0.001 | 0.002 | 0.9980         | 337.3  | 119.4                    | 2.0       | 117.7                    | 0.9       | 101.7                   | 1.6       | 94.7                     | 15.5      | 93.7                     | 13.3      | 106.7                   | 24.7      |
| 150 | Heptachlor         | 0.002 | 0.007 | 0.9992         | 63.9   | 106.3                    | 3.3       | 117.3                    | 3.4       | 103.9                   | 4.2       | 86.9                     | 22.2      | 87.5                     | 14.2      | 92.0                    | 4.9       |
|     | Heptachlor epoxide | 0.001 | 0.002 | 0.9991         | 49.4   | 111.9                    | 6.5       | 119.2                    | 3.0       | 106.2                   | 2.9       | 97.3                     | 14.6      | 96.2                     | 6.4       | 95.0                    | 3.5       |
| 151 | Heptenophos        | 0.002 | 0.005 | 0.9981         | 247.0  | 73.0                     | 9.9       | 114.2                    | 1.7       | 83.8                    | 2.6       | 96.1                     | 14.0      | 93.7                     | 15.0      | 94.3                    | 8.9       |
| 152 | Hexythiazox        | 0.001 | 0.003 | 0.9977         | 404.5  | 117.8                    | 3.9       | 118.5                    | 5.5       | 111.7                   | 6.5       | 82.7                     | 18.8      | 88.8                     | 14.4      | 93.5                    | 6.8       |
| 153 | Indanofan          | 0.001 | 0.002 | 0.9989         | 330.3  | 117.8                    | 1.8       | 118.6                    | 0.9       | 108.3                   | 1.1       | 95.3                     | 10.2      | 94.5                     | 4.1       | 100.2                   | 7.7       |
| 154 | Indoxacarb         | 0.002 | 0.005 | 0.9993         | 351.0  | 83.8                     | 6.9       | 116.3                    | 3.8       | 71.6                    | 2.6       | 78.6                     | 15.0      | 78.2                     | 20.2      | 86.6                    | 17.0      |
| 155 | Ipconazole         | 0.002 | 0.005 | 0.9981         | >500   | 119.5                    | 2.6       | 117.4                    | 0.7       | 108.7                   | 1.6       | 99.1                     | 18.3      | 101.0                    | 11.9      | 104.7                   | 12.0      |
| 156 | Iprobenfos         | 0.001 | 0.004 | 0.9983         | 438.4  | 119.9                    | 2.2       | 118.6                    | 0.7       | 107.7                   | 3.7       | 98.8                     | 17.1      | 97.5                     | 13.4      | 99.5                    | 8.4       |
| 157 | Iprodione          | 0.001 | 0.002 | 0.9994         | >500   | 100.5                    | 14.2      | 89.0                     | 7.3       | 91.8                    | 3.0       | 100.1                    | 11.5      | 98.0                     | 12.9      | 97.7                    | 21.6      |
| 158 | Isazofos           | 0.001 | 0.004 | 0.9976         | 100.5  | 116.7                    | 1.7       | 120.0                    | 2.9       | 104.9                   | 2.6       | 97.2                     | 13.1      | 99.1                     | 10.5      | 99.1                    | 5.1       |
| 159 | Isofenphos         | 0.002 | 0.005 | 0.9991         | 139.1  | 117.0                    | 1.6       | 116.0                    | 2.2       | 104.6                   | 2.7       | 92.9                     | 16.7      | 95.1                     | 12.6      | 97.6                    | 7.9       |
| 160 | Isofenphos-methyl  | 0.002 | 0.006 | 0.9989         | 143.2  | 119.1                    | 2.4       | 117.8                    | 3.0       | 104.2                   | 2.6       | 94.0                     | 15.0      | 95.6                     | 11.8      | 98.1                    | 6.5       |
| 161 | Isoproc carb       | 0.001 | 0.002 | 0.9985         | 258.3  | 74.0                     | 3.4       | 89.4                     | 5.3       | 71.1                    | 0.9       | 96.7                     | 23.2      | 95.5                     | 18.4      | 93.3                    | 13.3      |
| 162 | Isopropalin        | 0.002 | 0.006 | 0.9975         | 167.8  | 114.8                    | 5.5       | 118.5                    | 3.5       | 99.0                    | 2.4       | 91.1                     | 14.5      | 91.2                     | 10.5      | 96.8                    | 7.1       |

| No. | Analyte                 | LOD   | LOQ   | R <sup>2</sup> | ME.(%) | Repeatability (n=5)      |           |                          |           |                         |           | Reproducibility (n=11)   |           |                          |           |                         |           |
|-----|-------------------------|-------|-------|----------------|--------|--------------------------|-----------|--------------------------|-----------|-------------------------|-----------|--------------------------|-----------|--------------------------|-----------|-------------------------|-----------|
|     |                         |       |       |                |        | 0.01 mg kg <sup>-1</sup> |           | 0.02 mg kg <sup>-1</sup> |           | 0.1 mg kg <sup>-1</sup> |           | 0.01 mg kg <sup>-1</sup> |           | 0.02 mg kg <sup>-1</sup> |           | 0.1 mg kg <sup>-1</sup> |           |
|     |                         |       |       |                |        | Rec.<br>(%)              | CV<br>(%) | Rec.<br>(%)              | CV<br>(%) | Rec.<br>(%)             | CV<br>(%) | Rec.<br>(%)              | CV<br>(%) | Rec.<br>(%)              | CV<br>(%) | Rec.<br>(%)             | CV<br>(%) |
| 163 | Isoprothiolane          | 0.001 | 0.003 | 0.9942         | -59.4  | 114.0                    | 6.5       | 108.1                    | 5.6       | 107.6                   | 1.5       | 89.6                     | 17.1      | 90.8                     | 17.5      | 93.0                    | 13.5      |
| 164 | Isopyrazam              | 0.001 | 0.003 | 0.9985         | >500   | 108.7                    | 3.3       | 118.3                    | 2.8       | 106.9                   | 2.6       | 93.7                     | 14.1      | 98.9                     | 11.3      | 102.4                   | 11.9      |
| 165 | Isotianil               | 0.001 | 0.002 | 0.9979         | >500   | 95.8                     | 2.7       | 102.0                    | 6.5       | 101.0                   | 0.9       | 104.6                    | 7.2       | 98.4                     | 4.4       | 99.7                    | 11.5      |
| 166 | Isoxadifen-ethyl        | 0.001 | 0.002 | 0.9989         | 196.3  | 119.2                    | 0.5       | 111.9                    | 3.7       | 103.6                   | 1.1       | 98.3                     | 12.4      | 97.2                     | 10.5      | 101.7                   | 12.0      |
| 167 | Kresoxim-methyl         | 0.001 | 0.003 | 0.9993         | 101.3  | 116.3                    | 1.9       | 116.9                    | 4.2       | 109.1                   | 1.3       | 95.2                     | 11.7      | 99.2                     | 8.2       | 101.0                   | 5.3       |
| 168 | Leptophos               | 0.001 | 0.002 | 0.9988         | 257.8  | 98.6                     | 2.4       | 97.9                     | 5.0       | 91.3                    | 1.0       | 88.1                     | 5.3       | 82.1                     | 9.0       | 89.3                    | 4.1       |
| 169 | Mefenpyr-diethyl        | 0.001 | 0.002 | 0.9989         | 255.0  | 114.1                    | 0.6       | 119.2                    | 3.2       | 108.6                   | 1.4       | 98.6                     | 11.8      | 98.8                     | 10.5      | 101.0                   | 8.7       |
| 170 | Mepanipyrin             | 0.001 | 0.003 | 0.9984         | -11.6  | 116.0                    | 1.8       | 115.7                    | 3.0       | 104.3                   | 6.3       | 92.7                     | 22.3      | 91.4                     | 14.5      | 93.9                    | 8.6       |
| 171 | Mepronil                | 0.001 | 0.002 | 0.9990         | >500   | 119.8                    | 0.7       | 117.9                    | 4.5       | 106.4                   | 1.7       | 95.7                     | 12.1      | 98.9                     | 8.3       | 99.9                    | 7.8       |
| 172 | Metalaxyl               | 0.001 | 0.002 | 0.9988         | 92.0   | 117.8                    | 2.8       | 119.6                    | 1.1       | 100.7                   | 1.7       | 90.9                     | 18.5      | 92.6                     | 14.8      | 97.5                    | 7.2       |
| 173 | Methidathion            | 0.001 | 0.002 | 1.0000         | 415.7  | 105.3                    | 2.2       | 109.6                    | 3.3       | 86.2                    | 3.1       | 102.1                    | 8.1       | 100.3                    | 9.5       | 93.6                    | 10.7      |
| 174 | Methoprotryn            | 0.002 | 0.006 | 0.9989         | 237.4  | 118.3                    | 0.1       | 113.1                    | 5.2       | 105.8                   | 0.9       | 97.0                     | 16.3      | 97.6                     | 9.4       | 97.0                    | 9.1       |
| 175 | Methoxychlor            | 0.001 | 0.004 | 0.9974         | 64.3   | 118.1                    | 1.5       | 117.2                    | 3.3       | 104.5                   | 1.5       | 112.0                    | 5.7       | 104.5                    | 3.9       | 92.2                    | 7.3       |
| 176 | Methyl trithion         | 0.001 | 0.003 | 0.9985         | 338.4  | 110.1                    | 2.0       | 108.8                    | 2.9       | 96.4                    | 2.7       | 92.6                     | 14.5      | 93.0                     | 7.2       | 91.5                    | 6.5       |
| 177 | Metolachlor             | 0.001 | 0.003 | 0.9989         | 132.4  | 117.9                    | 0.6       | 117.9                    | 4.2       | 102.2                   | 1.6       | 95.1                     | 16.3      | 94.7                     | 13.2      | 96.5                    | 7.6       |
| 178 | Metribuzin              | 0.002 | 0.005 | 0.9988         | 123.1  | 115.3                    | 2.2       | 117.0                    | 3.5       | 98.8                    | 1.0       | 99.9                     | 15.0      | 100.4                    | 11.9      | 100.8                   | 8.6       |
| 179 | MGK-264                 | 0.001 | 0.002 | 0.9988         | 116.8  | 116.9                    | 0.9       | 116.5                    | 2.6       | 102.9                   | 1.8       | 93.9                     | 15.8      | 93.4                     | 8.1       | 98.8                    | 9.5       |
| 180 | Molinate                | 0.001 | 0.004 | 0.9984         | 94.1   | 103.1                    | 7.8       | 115.8                    | 4.8       | 104.7                   | 6.1       | 220.9                    | 105.3     | 152.0                    | 72.1      | 97.5                    | 6.3       |
| 181 | Monolinuron             | 0.002 | 0.006 | 0.9953         | 137.7  | 94.0                     | 5.0       | 115.1                    | 3.6       | 98.2                    | 3.9       | 91.9                     | 21.0      | 102.3                    | 9.1       | 103.2                   | 5.8       |
| 182 | Myclobutanil            | 0.002 | 0.006 | 0.9992         | 159.0  | 119.1                    | 0.5       | 114.2                    | 4.7       | 107.4                   | 0.8       | 97.0                     | 13.3      | 97.1                     | 8.5       | 98.9                    | 4.9       |
| 183 | Nitrothal-isopropyl     | 0.001 | 0.002 | 0.9973         | 233.4  | 117.7                    | 4.5       | 116.7                    | 4.0       | 94.7                    | 3.2       | 97.1                     | 18.1      | 95.0                     | 9.9       | 104.9                   | 9.2       |
| 184 | Nonachlor- <i>cis</i>   | 0.001 | 0.004 | 0.9991         | 56.2   | 108.0                    | 4.1       | 114.4                    | 2.5       | 101.8                   | 0.4       | 88.3                     | 15.5      | 85.6                     | 13.8      | 93.1                    | 2.3       |
|     | Nonachlor- <i>trans</i> | 0.001 | 0.003 | 0.9988         | -28.7  | 109.3                    | 3.6       | 114.8                    | 2.1       | 103.8                   | 2.5       | 93.3                     | 18.6      | 92.9                     | 8.2       | 93.4                    | 3.3       |

| No. | Analyte                 | LOD   | LOQ   | R <sup>2</sup> | ME.(%) | Repeatability (n=5)      |           |                          |           |                         |           | Reproducibility (n=11)   |           |                          |           |                         |           |
|-----|-------------------------|-------|-------|----------------|--------|--------------------------|-----------|--------------------------|-----------|-------------------------|-----------|--------------------------|-----------|--------------------------|-----------|-------------------------|-----------|
|     |                         |       |       |                |        | 0.01 mg kg <sup>-1</sup> |           | 0.02 mg kg <sup>-1</sup> |           | 0.1 mg kg <sup>-1</sup> |           | 0.01 mg kg <sup>-1</sup> |           | 0.02 mg kg <sup>-1</sup> |           | 0.1 mg kg <sup>-1</sup> |           |
|     |                         |       |       |                |        | Rec.<br>(%)              | CV<br>(%) | Rec.<br>(%)              | CV<br>(%) | Rec.<br>(%)             | CV<br>(%) | Rec.<br>(%)              | CV<br>(%) | Rec.<br>(%)              | CV<br>(%) | Rec.<br>(%)             | CV<br>(%) |
| 185 | Nuarimol                | 0.001 | 0.002 | 0.9992         | 252.5  | 117.7                    | 1.4       | 117.0                    | 2.6       | 103.7                   | 0.8       | 93.6                     | 17.7      | 92.7                     | 13.4      | 96.5                    | 8.8       |
| 186 | Ortho-phenyl phenol     | 0.001 | 0.004 | 0.9980         | 369.6  | 104.5                    | 7.3       | 115.8                    | 1.5       | 103.5                   | 2.9       | 96.0                     | 35.1      | 95.7                     | 21.5      | 97.3                    | 6.9       |
| 187 | Oxadiazon               | 0.001 | 0.003 | 0.9989         | 133.3  | 117.3                    | 2.5       | 117.2                    | 4.6       | 108.9                   | 1.0       | 94.6                     | 14.1      | 97.0                     | 9.0       | 96.7                    | 6.6       |
| 188 | Oxadixyl                | 0.002 | 0.006 | 0.9990         | 110.9  | 99.0                     | 2.0       | 103.2                    | 5.0       | 87.6                    | 1.6       | 97.6                     | 12.6      | 97.7                     | 8.1       | 100.6                   | 6.4       |
| 189 | Oxyfluorfen             | 0.001 | 0.002 | 0.9982         | 333.9  | 117.2                    | 3.7       | 115.9                    | 5.7       | 107.0                   | 3.5       | 97.1                     | 19.9      | 93.7                     | 13.2      | 98.9                    | 2.1       |
| 190 | Paclobutrazol           | 0.001 | 0.003 | 0.9992         | >500   | 118.1                    | 1.7       | 119.0                    | 1.3       | 102.7                   | 8.2       | 91.1                     | 21.5      | 94.1                     | 18.1      | 96.2                    | 14.1      |
| 191 | Parathion               | 0.001 | 0.002 | 0.9979         | 278.8  | 113.1                    | 4.5       | 118.6                    | 1.9       | 98.4                    | 4.4       | 95.3                     | 15.5      | 100.2                    | 9.8       | 104.3                   | 9.3       |
| 192 | Parathion-methyl        | 0.001 | 0.002 | 0.9978         | 269.0  | 119.0                    | 2.4       | 119.6                    | 1.7       | 93.1                    | 3.3       | 101.6                    | 8.7       | 96.4                     | 5.4       | 97.9                    | 6.6       |
| 193 | Penconazole             | 0.001 | 0.002 | 0.9991         | 120.9  | 116.9                    | 1.0       | 118.9                    | 0.4       | 102.7                   | 3.0       | 92.4                     | 15.9      | 93.6                     | 11.9      | 97.9                    | 6.8       |
| 194 | Pendimethalin           | 0.001 | 0.002 | 0.9971         | 240.6  | 117.2                    | 4.3       | 114.9                    | 3.4       | 98.3                    | 3.3       | 95.2                     | 13.8      | 91.8                     | 9.6       | 99.3                    | 8.6       |
| 195 | Penflufen               | 0.001 | 0.002 | 0.9992         | 320.6  | 117.5                    | 0.8       | 115.9                    | 3.0       | 106.3                   | 1.4       | 95.7                     | 15.7      | 98.0                     | 9.9       | 99.5                    | 7.8       |
| 196 | Pentachlorobenzonitrile | 0.001 | 0.002 | 0.9989         | 111.7  | 97.9                     | 5.7       | 112.8                    | 3.8       | 106.4                   | 3.8       | 93.2                     | 13.3      | 94.0                     | 10.3      | 93.7                    | 3.6       |
| 197 | Penthiopyrad            | 0.001 | 0.002 | 0.9989         | 450.0  | 119.5                    | 0.5       | 115.7                    | 4.2       | 107.3                   | 1.2       | 95.8                     | 14.4      | 96.9                     | 10.7      | 99.9                    | 8.1       |
| 198 | Pentoxazone             | 0.001 | 0.002 | 0.9989         | 218.4  | 118.1                    | 1.4       | 118.8                    | 3.2       | 106.7                   | 1.3       | 94.2                     | 12.2      | 96.6                     | 9.7       | 100.1                   | 7.0       |
| 199 | Permethrin-cis          | 0.002 | 0.007 | 0.9987         | 410.2  | 84.9                     | 13.0      | 114.6                    | 1.6       | 98.7                    | 1.8       | 94.6                     | 21.3      | 96.1                     | 14.7      | 99.2                    | 13.9      |
|     | Permethrin-trans        | 0.001 | 0.002 | 0.9984         | 358.0  | 115.0                    | 4.5       | 109.8                    | 3.8       | 106.0                   | 1.8       | 99.8                     | 18.0      | 97.5                     | 13.0      | 98.8                    | 14.2      |
| 200 | Perthane                | 0.001 | 0.002 | 0.9989         | 123.2  | 116.5                    | 1.0       | 115.5                    | 3.4       | 107.5                   | 0.8       | 92.7                     | 15.0      | 94.4                     | 11.7      | 95.6                    | 7.9       |
| 201 | Phenthoate              | 0.001 | 0.002 | 0.9988         | 193.4  | 118.7                    | 2.0       | 119.4                    | 1.8       | 102.0                   | 3.4       | 99.3                     | 14.2      | 97.3                     | 13.3      | 100.3                   | 11.7      |
| 202 | Phosphamidon (E)        | 0.002 | 0.005 | 0.9987         | >500   | 82.1                     | 9.7       | 91.7                     | 8.6       | 109.7                   | 7.4       | 92.9                     | 26.5      | 102.5                    | 15.2      | 89.4                    | 21.5      |
|     | Phosphamidon (Z)        | 0.002 | 0.005 | 0.9983         | >500   | 107.5                    | 11.0      | 96.1                     | 2.1       | 96.5                    | 6.5       | 87.1                     | 29.9      | 102.7                    | 14.7      | 91.9                    | 21.1      |
| 203 | Phosalone               | 0.001 | 0.003 | 0.9980         | >500   | 106.8                    | 2.8       | 95.1                     | 5.8       | 83.6                    | 1.5       | 105.9                    | 5.7       | 96.2                     | 7.9       | 95.8                    | 9.6       |
| 204 | Phosmet                 | 0.001 | 0.004 | 0.9977         | >500   | 83.3                     | 5.7       | 87.6                     | 5.1       | 102.4                   | 6.4       | 84.3                     | 13.3      | 88.7                     | 23.8      | 93.7                    | 24.7      |
| 205 | Picoxystrobin           | 0.001 | 0.003 | 0.9987         | 29.0   | 118.6                    | 3.5       | 119.4                    | 3.3       | 108.5                   | 5.7       | 92.8                     | 16.3      | 95.6                     | 12.6      | 97.5                    | 8.0       |

| No. | Analyte               | LOD   | LOQ   | R <sup>2</sup> | ME.(%) | Repeatability (n=5)      |           |                          |           |                         |           | Reproducibility (n=11)   |           |                          |           |                         |           |
|-----|-----------------------|-------|-------|----------------|--------|--------------------------|-----------|--------------------------|-----------|-------------------------|-----------|--------------------------|-----------|--------------------------|-----------|-------------------------|-----------|
|     |                       |       |       |                |        | 0.01 mg kg <sup>-1</sup> |           | 0.02 mg kg <sup>-1</sup> |           | 0.1 mg kg <sup>-1</sup> |           | 0.01 mg kg <sup>-1</sup> |           | 0.02 mg kg <sup>-1</sup> |           | 0.1 mg kg <sup>-1</sup> |           |
|     |                       |       |       |                |        | Rec.<br>(%)              | CV<br>(%) | Rec.<br>(%)              | CV<br>(%) | Rec.<br>(%)             | CV<br>(%) | Rec.<br>(%)              | CV<br>(%) | Rec.<br>(%)              | CV<br>(%) | Rec.<br>(%)             | CV<br>(%) |
| 206 | Piperonyl butoxide    | 0.001 | 0.002 | 0.9989         | 447.4  | 119.4                    | 1.4       | 117.7                    | 4.0       | 107.8                   | 2.0       | 99.1                     | 9.6       | 99.3                     | 10.8      | 101.0                   | 9.0       |
| 207 | Pirimicarb            | 0.001 | 0.004 | 0.9985         | 144.5  | 111.4                    | 2.3       | 116.7                    | 4.6       | 100.5                   | 2.0       | 92.3                     | 18.7      | 95.3                     | 13.1      | 96.9                    | 7.8       |
| 208 | Pirimiphos-ethyl      | 0.001 | 0.002 | 0.9987         | 154.3  | 115.9                    | 2.2       | 119.1                    | 2.9       | 103.8                   | 2.6       | 94.4                     | 14.5      | 96.2                     | 11.8      | 98.3                    | 7.6       |
| 209 | Pirimiphos-methyl     | 0.001 | 0.002 | 0.9985         | 191.4  | 118.2                    | 1.1       | 116.6                    | 4.7       | 101.0                   | 3.9       | 92.8                     | 16.2      | 91.3                     | 15.3      | 96.0                    | 6.5       |
| 210 | Pretilachlor          | 0.001 | 0.002 | 0.9932         | -62.6  | 99.7                     | 6.1       | 99.1                     | 6.1       | 92.9                    | 0.9       | 90.7                     | 18.7      | 92.3                     | 16.2      | 93.1                    | 11.8      |
| 211 | Prochloraz            | 0.001 | 0.004 | 0.9980         | >500   | 118.1                    | 11.7      | 117.9                    | 6.9       | 103.8                   | 1.6       | 92.7                     | 11.8      | 101.2                    | 10.6      | 102.6                   | 16.4      |
|     | 2,4,6-trichlorophenol | 0.002 | 0.006 | 0.9954         | 222.2  | 85.3                     | 4.1       | 111.3                    | 5.6       | 98.5                    | 4.1       | 71.2                     | 15.5      | 67.9                     | 15.3      | 69.2                    | 22.6      |
| 212 | Procymidone           | 0.001 | 0.002 | 0.9991         | 88.7   | 118.1                    | 0.7       | 118.6                    | 1.2       | 105.6                   | 1.6       | 93.5                     | 12.7      | 95.0                     | 11.6      | 97.4                    | 5.8       |
| 213 | Prodiamine            | 0.001 | 0.002 | 0.9981         | 208.6  | 119.4                    | 1.9       | 118.4                    | 2.4       | 100.8                   | 4.1       | 91.3                     | 15.9      | 95.7                     | 8.1       | 101.4                   | 6.8       |
| 214 | Profenofos            | 0.001 | 0.002 | 0.9991         | >500   | 65.9                     | 6.1       | 70.7                     | 7.1       | 108.8                   | 7.5       | 89.6                     | 23.3      | 89.8                     | 20.4      | 88.8                    | 17.2      |
| 215 | Profluralin           | 0.001 | 0.002 | 0.9976         | 128.3  | 117.5                    | 1.3       | 115.9                    | 6.3       | 101.7                   | 3.6       | 101.5                    | 15.1      | 103.8                    | 12.4      | 103.1                   | 6.4       |
| 216 | Prohydrojasmon        | 0.001 | 0.004 | 0.9975         | 162.1  | 119.6                    | 2.4       | 118.5                    | 2.4       | 101.9                   | 4.7       | 84.9                     | 28.4      | 88.4                     | 16.7      | 100.2                   | 9.0       |
| 217 | Prometon              | 0.001 | 0.003 | 0.9989         | 170.7  | 115.7                    | 2.6       | 118.5                    | 4.2       | 104.5                   | 2.5       | 91.7                     | 16.3      | 97.5                     | 11.4      | 102.6                   | 10.5      |
| 218 | Prometryn             | 0.002 | 0.006 | 0.9990         | 121.4  | 116.2                    | 0.3       | 118.1                    | 0.8       | 102.3                   | 3.2       | 87.3                     | 18.6      | 93.4                     | 12.5      | 97.3                    | 7.4       |
| 219 | Propachlor            | 0.002 | 0.005 | 0.9984         | 127.4  | 86.7                     | 6.1       | 113.7                    | 3.1       | 89.6                    | 0.7       | 90.8                     | 21.0      | 95.8                     | 14.5      | 95.3                    | 9.1       |
| 220 | Propanil              | 0.001 | 0.002 | 0.9984         | 192.5  | 112.9                    | 3.4       | 99.3                     | 1.9       | 100.1                   | 4.8       | 84.6                     | 27.6      | 93.4                     | 16.4      | 98.2                    | 6.4       |
| 221 | Propazine             | 0.002 | 0.006 | 0.9989         | 121.6  | 113.5                    | 0.1       | 118.2                    | 0.6       | 105.4                   | 1.1       | 91.4                     | 14.3      | 92.9                     | 13.6      | 97.3                    | 4.3       |
| 222 | Propetamphos          | 0.001 | 0.002 | 0.9980         | 178.0  | 113.8                    | 3.1       | 116.8                    | 1.9       | 105.0                   | 3.0       | 96.3                     | 16.3      | 96.4                     | 12.2      | 98.5                    | 7.4       |
| 223 | Propham               | 0.001 | 0.004 | 0.9978         | 206.9  | 98.4                     | 9.6       | 119.7                    | 2.5       | 105.2                   | 1.6       | 95.0                     | 18.0      | 96.0                     | 13.7      | 96.5                    | 6.3       |
| 224 | Propiconazole-1       | 0.001 | 0.003 | 0.9990         | 223.4  | 117.4                    | 0.7       | 118.6                    | 3.3       | 107.3                   | 0.6       | 93.3                     | 16.1      | 98.7                     | 10.3      | 100.9                   | 8.5       |
|     | Propiconazole-2       | 0.001 | 0.003 | 0.9993         | 219.9  | 117.3                    | 1.1       | 118.5                    | 1.1       | 104.5                   | 1.1       | 95.4                     | 7.7       | 99.0                     | 6.9       | 100.5                   | 5.3       |
| 225 | Propisochlor          | 0.001 | 0.002 | 0.9990         | 95.8   | 117.5                    | 1.8       | 114.7                    | 4.5       | 100.8                   | 1.1       | 94.3                     | 18.1      | 97.8                     | 10.7      | 99.4                    | 7.8       |
| 226 | Propyzamide           | 0.002 | 0.006 | 0.9984         | 150.2  | 114.8                    | 3.2       | 119.7                    | 0.6       | 103.1                   | 2.4       | 101.3                    | 16.5      | 96.6                     | 11.5      | 97.1                    | 6.4       |

| No. | Analyte                | LOD   | LOQ   | R <sup>2</sup> | ME.(%) | Repeatability (n=5)      |           |                          |           |                         |           | Reproducibility (n=11)   |           |                          |           |                         |           |
|-----|------------------------|-------|-------|----------------|--------|--------------------------|-----------|--------------------------|-----------|-------------------------|-----------|--------------------------|-----------|--------------------------|-----------|-------------------------|-----------|
|     |                        |       |       |                |        | 0.01 mg kg <sup>-1</sup> |           | 0.02 mg kg <sup>-1</sup> |           | 0.1 mg kg <sup>-1</sup> |           | 0.01 mg kg <sup>-1</sup> |           | 0.02 mg kg <sup>-1</sup> |           | 0.1 mg kg <sup>-1</sup> |           |
|     |                        |       |       |                |        | Rec.<br>(%)              | CV<br>(%) | Rec.<br>(%)              | CV<br>(%) | Rec.<br>(%)             | CV<br>(%) | Rec.<br>(%)              | CV<br>(%) | Rec.<br>(%)              | CV<br>(%) | Rec.<br>(%)             | CV<br>(%) |
| 227 | Prothiofos             | 0.001 | 0.002 | 0.9989         | -63.2  | 101.6                    | 7.4       | 104.3                    | 4.5       | 104.2                   | 2.6       | 84.9                     | 19.5      | 87.2                     | 15.5      | 86.5                    | 13.2      |
| 228 | Pyracarbolid           | 0.001 | 0.003 | 0.9969         | 274.7  | 91.9                     | 6.6       | 119.5                    | 1.8       | 96.9                    | 5.2       | 85.6                     | 16.5      | 93.7                     | 12.6      | 96.5                    | 10.6      |
| 229 | Pyraclofos             | 0.002 | 0.006 | 0.9979         | >500   | 71.1                     | 9.1       | 82.1                     | 7.9       | 104.1                   | 6.0       | 107.1                    | 13.8      | 104.3                    | 16.7      | 96.6                    | 6.9       |
| 230 | Pyraflufen-ethyl       | 0.001 | 0.003 | 0.9989         | 297.3  | 118.9                    | 0.9       | 114.6                    | 3.5       | 104.2                   | 2.0       | 86.3                     | 21.9      | 91.8                     | 17.8      | 96.9                    | 12.4      |
| 231 | Pyrazophos             | 0.001 | 0.002 | 0.9978         | >500   | 117.3                    | 2.1       | 113.0                    | 4.7       | 95.9                    | 2.7       | 105.6                    | 13.0      | 100.9                    | 14.2      | 102.1                   | 15.8      |
| 232 | Pyridalyl              | 0.001 | 0.002 | 0.9982         | >500   | 118.3                    | 1.4       | 116.4                    | 3.1       | 102.8                   | 2.7       | 91.3                     | 18.1      | 92.7                     | 14.8      | 97.1                    | 15.5      |
| 233 | Pyrifenox              | 0.002 | 0.005 | 0.9992         | 154.3  | 117.4                    | 0.3       | 116.9                    | 3.7       | 104.3                   | 3.9       | 90.8                     | 17.6      | 94.8                     | 13.5      | 96.5                    | 9.2       |
| 234 | Pyriftalid             | 0.002 | 0.005 | 0.9985         | 397.2  | 106.1                    | 0.6       | 117.4                    | 2.4       | 103.2                   | 1.7       | 100.0                    | 10.8      | 102.7                    | 9.7       | 108.1                   | 10.3      |
| 235 | Pyrimethanil           | 0.002 | 0.006 | 0.9985         | 148.8  | 117.4                    | 1.8       | 119.7                    | 0.2       | 102.7                   | 4.7       | 91.6                     | 17.1      | 93.3                     | 11.5      | 96.7                    | 4.9       |
| 236 | Pyriminobac-methyl (E) | 0.001 | 0.002 | 0.9991         | 262.9  | 110.3                    | 0.8       | 117.4                    | 3.6       | 108.0                   | 1.3       | 98.0                     | 17.9      | 98.6                     | 13.2      | 100.5                   | 11.7      |
|     | Pyriminobac-methyl (Z) | 0.001 | 0.004 | 0.9990         | 150.4  | 115.3                    | 1.9       | 115.8                    | 3.9       | 108.6                   | 0.7       | 97.3                     | 12.1      | 99.7                     | 9.0       | 101.5                   | 7.3       |
| 237 | Quinalphos             | 0.002 | 0.006 | 0.9989         | 163.8  | 117.2                    | 1.8       | 76.6                     | 0.2       | 105.2                   | 3.2       | 91.9                     | 9.7       | 98.8                     | 11.8      | 98.2                    | 9.0       |
| 238 | Quinoxifen             | 0.001 | 0.003 | 0.9992         | 119.3  | 110.9                    | 1.9       | 114.8                    | 3.4       | 104.9                   | 1.3       | 90.1                     | 14.1      | 92.2                     | 10.2      | 94.0                    | 6.3       |
| 239 | Quintozene             | 0.001 | 0.002 | 0.9980         | 135.8  | 104.4                    | 8.3       | 117.0                    | 4.8       | 97.1                    | 5.3       | 87.2                     | 7.1       | 87.0                     | 4.0       | 85.8                    | 15.4      |
| 240 | Quizalofop-ethyl       | 0.001 | 0.002 | 0.9983         | >500   | 110.0                    | 0.7       | 118.1                    | 0.9       | 106.4                   | 2.0       | 88.4                     | 19.5      | 90.8                     | 9.7       | 94.0                    | 8.3       |
| 241 | Silafluofen            | 0.001 | 0.002 | 0.9981         | 306.5  | 117.3                    | 0.8       | 119.2                    | 2.5       | 102.8                   | 1.7       | 91.2                     | 13.8      | 89.5                     | 11.5      | 92.6                    | 7.4       |
| 242 | Simeconazole           | 0.001 | 0.003 | 0.9988         | 198.5  | 118.4                    | 3.1       | 119.0                    | 3.2       | 105.1                   | 3.8       | 94.4                     | 18.8      | 93.1                     | 16.2      | 98.3                    | 8.8       |
| 243 | Simetryn               | 0.001 | 0.003 | 0.9990         | 140.0  | 114.1                    | 1.0       | 114.9                    | 1.9       | 100.2                   | 1.8       | 88.0                     | 20.1      | 91.9                     | 15.1      | 95.1                    | 9.5       |
| 244 | Spiromesifen           | 0.001 | 0.003 | 0.9992         | 261.1  | 93.8                     | 3.7       | 86.9                     | 6.7       | 83.5                    | 1.6       | 92.2                     | 14.3      | 92.9                     | 11.9      | 97.6                    | 8.2       |
| 245 | Spiroxamine-1          | 0.001 | 0.002 | 0.9989         | 194.0  | 105.9                    | 1.6       | 119.4                    | 8.4       | 99.5                    | 5.1       | 76.3                     | 26.6      | 92.7                     | 16.7      | 91.2                    | 3.9       |
|     | Spiroxamine-2          | 0.001 | 0.003 | 0.9986         | 183.4  | 106.4                    | 2.2       | 112.0                    | 1.8       | 95.7                    | 4.7       | 82.8                     | 32.8      | 96.6                     | 12.5      | 93.2                    | 2.6       |
| 246 | Sulfotep               | 0.001 | 0.003 | 0.9981         | 110.3  | 113.5                    | 4.3       | 117.9                    | 1.0       | 104.7                   | 1.2       | 97.1                     | 16.0      | 97.2                     | 12.4      | 97.1                    | 7.2       |
| 247 | Tebuconazole           | 0.002 | 0.007 | 0.9990         | 458.4  | 118.3                    | 0.9       | 115.1                    | 3.8       | 105.0                   | 1.0       | 93.8                     | 18.1      | 93.0                     | 13.4      | 96.8                    | 10.9      |

| No. | Analyte           | LOD   | LOQ   | R <sup>2</sup> | ME.(%) | Repeatability (n=5)      |           |                          |           |                         |           | Reproducibility (n=11)   |           |                          |           |                         |           |
|-----|-------------------|-------|-------|----------------|--------|--------------------------|-----------|--------------------------|-----------|-------------------------|-----------|--------------------------|-----------|--------------------------|-----------|-------------------------|-----------|
|     |                   |       |       |                |        | 0.01 mg kg <sup>-1</sup> |           | 0.02 mg kg <sup>-1</sup> |           | 0.1 mg kg <sup>-1</sup> |           | 0.01 mg kg <sup>-1</sup> |           | 0.02 mg kg <sup>-1</sup> |           | 0.1 mg kg <sup>-1</sup> |           |
|     |                   |       |       |                |        | Rec.<br>(%)              | CV<br>(%) | Rec.<br>(%)              | CV<br>(%) | Rec.<br>(%)             | CV<br>(%) | Rec.<br>(%)              | CV<br>(%) | Rec.<br>(%)              | CV<br>(%) | Rec.<br>(%)             | CV<br>(%) |
| 248 | Tebufenpyrad      | 0.002 | 0.006 | 0.9987         | 260.7  | 117.8                    | 1.1       | 117.2                    | 3.2       | 107.7                   | 1.8       | 94.8                     | 13.0      | 97.0                     | 9.2       | 98.9                    | 8.1       |
| 249 | Tebupirimfos      | 0.001 | 0.002 | 0.9983         | 126.3  | 112.0                    | 3.1       | 118.6                    | 2.4       | 104.5                   | 2.5       | 89.8                     | 18.9      | 95.2                     | 11.7      | 96.5                    | 7.5       |
| 250 | Tecnazene         | 0.002 | 0.005 | 0.9979         | 120.5  | 105.9                    | 6.3       | 113.8                    | 1.7       | 104.6                   | 6.8       | 95.2                     | 12.4      | 96.2                     | 9.0       | 94.1                    | 3.4       |
| 251 | Tefluthrin        | 0.001 | 0.002 | 0.9981         | 86.1   | 112.8                    | 2.0       | 119.1                    | 1.3       | 109.2                   | 1.3       | 93.2                     | 14.9      | 94.6                     | 11.2      | 94.5                    | 4.1       |
| 252 | Terbacil          | 0.001 | 0.002 | 0.9983         | 372.1  | 119.6                    | 0.7       | 119.7                    | 0.4       | 95.0                    | 8.3       | 96.1                     | 10.3      | 93.0                     | 16.1      | 93.7                    | 11.9      |
| 253 | Terbumeton        | 0.001 | 0.003 | 0.9990         | 150.4  | 117.6                    | 2.2       | 119.8                    | 0.2       | 106.0                   | 2.6       | 89.6                     | 19.9      | 92.6                     | 15.3      | 98.0                    | 4.9       |
| 254 | Terbutryn         | 0.001 | 0.003 | 0.9991         | 144.8  | 113.1                    | 2.5       | 116.4                    | 3.7       | 103.4                   | 2.2       | 92.5                     | 15.1      | 92.5                     | 13.4      | 96.3                    | 5.3       |
| 255 | Tetrachlorvinphos | 0.002 | 0.006 | 0.9992         | 450.8  | 119.9                    | 0.1       | 78.2                     | 2.6       | 101.4                   | 0.7       | 88.3                     | 23.5      | 98.9                     | 15.9      | 98.0                    | 8.1       |
| 256 | Tetraconazole     | 0.002 | 0.005 | 0.9991         | 135.4  | 118.2                    | 0.8       | 118.3                    | 2.6       | 105.6                   | 3.2       | 93.5                     | 12.8      | 95.6                     | 10.5      | 98.7                    | 6.1       |
| 257 | Tetradifon        | 0.001 | 0.003 | 0.9989         | 103.2  | 118.0                    | 1.1       | 119.2                    | 2.5       | 104.1                   | 1.3       | 97.6                     | 7.6       | 96.1                     | 7.6       | 98.7                    | 5.1       |
| 258 | Tetramethrin-1    | 0.001 | 0.003 | 0.9983         | >500   | 75.2                     | 4.2       | 110.0                    | 13.7      | 96.3                    | 1.6       | 97.6                     | 20.9      | 99.3                     | 12.1      | 99.2                    | 12.3      |
|     | Tetramethrin-2    | 0.001 | 0.003 | 0.9988         | 494.1  | 88.5                     | 13.1      | 114.3                    | 2.1       | 107.6                   | 1.5       | 132.8                    | 14.4      | 103.6                    | 5.1       | 91.2                    | 10.1      |
| 259 | Thifluzamide      | 0.001 | 0.002 | 0.9991         | >500   | 115.6                    | 2.3       | 108.8                    | 7.5       | 109.0                   | 1.7       | 92.1                     | 16.4      | 97.1                     | 10.2      | 98.2                    | 9.0       |
| 260 | Thiometon         | 0.001 | 0.003 | 0.9984         | 157.8  | 110.9                    | 6.0       | 115.6                    | 4.5       | 100.7                   | 9.3       | 91.3                     | 19.4      | 98.2                     | 16.5      | 98.3                    | 15.6      |
| 261 | Thionazin         | 0.001 | 0.003 | 0.9980         | 128.8  | 104.8                    | 6.2       | 117.4                    | 7.4       | 104.4                   | 1.9       | 96.2                     | 16.9      | 95.6                     | 13.6      | 95.1                    | 7.9       |
| 262 | Tolclofos-methyl  | 0.001 | 0.003 | 0.9988         | 106.1  | 114.4                    | 1.3       | 119.4                    | 1.5       | 105.2                   | 0.5       | 94.0                     | 15.5      | 93.9                     | 11.8      | 95.9                    | 3.6       |
| 263 | Triadimefon       | 0.001 | 0.003 | 0.9989         | 126.9  | 118.8                    | 1.0       | 119.6                    | 0.7       | 104.4                   | 2.2       | 98.4                     | 12.6      | 102.4                    | 10.4      | 99.9                    | 4.9       |
| 264 | Triadimenol       | 0.002 | 0.005 | 0.9991         | 293.2  | 117.8                    | 2.5       | 117.3                    | 2.4       | 107.0                   | 5.1       | 87.6                     | 9.5       | 85.5                     | 16.3      | 95.0                    | 11.5      |
| 265 | Tri-allate        | 0.002 | 0.006 | 0.9988         | 96.8   | 109.3                    | 3.7       | 115.9                    | 2.4       | 109.1                   | 2.1       | 93.9                     | 11.1      | 94.4                     | 10.6      | 93.5                    | 3.7       |
| 266 | Triazophos        | 0.001 | 0.002 | 0.9990         | 457.6  | 110.2                    | 2.8       | 100.4                    | 6.9       | 92.9                    | 2.1       | 101.8                    | 6.2       | 90.7                     | 19.5      | 101.3                   | 11.1      |
| 267 | Tridiphane        | 0.001 | 0.004 | 0.9984         | 41.7   | 113.5                    | 3.1       | 118.5                    | 1.3       | 103.7                   | 2.1       | 105.5                    | 5.5       | 99.5                     | 6.5       | 97.3                    | 8.1       |
| 268 | Trifloxystrobin   | 0.001 | 0.002 | 0.9993         | 204.5  | 118.8                    | 0.5       | 117.2                    | 3.2       | 109.6                   | 1.3       | 93.8                     | 15.2      | 101.2                    | 10.5      | 102.5                   | 8.9       |
| 269 | Triflumizole      | 0.002 | 0.007 | 0.9990         | 159.6  | 116.7                    | 2.6       | 71.4                     | 0.3       | 102.9                   | 3.5       | 90.5                     | 20.9      | 96.0                     | 13.0      | 96.8                    | 7.3       |

| No. | Analyte     | LOD   | LOQ   | R <sup>2</sup> | ME.(%) | Repeatability (n=5)      |           |                          |           |                         |           | Reproducibility (n=11)   |           |                          |           |                         |           |
|-----|-------------|-------|-------|----------------|--------|--------------------------|-----------|--------------------------|-----------|-------------------------|-----------|--------------------------|-----------|--------------------------|-----------|-------------------------|-----------|
|     |             |       |       |                |        | 0.01 mg kg <sup>-1</sup> |           | 0.02 mg kg <sup>-1</sup> |           | 0.1 mg kg <sup>-1</sup> |           | 0.01 mg kg <sup>-1</sup> |           | 0.02 mg kg <sup>-1</sup> |           | 0.1 mg kg <sup>-1</sup> |           |
|     |             |       |       |                |        | Rec.<br>(%)              | CV<br>(%) | Rec.<br>(%)              | CV<br>(%) | Rec.<br>(%)             | CV<br>(%) | Rec.<br>(%)              | CV<br>(%) | Rec.<br>(%)              | CV<br>(%) | Rec.<br>(%)             | CV<br>(%) |
| 270 | Trifluralin | 0.001 | 0.002 | 0.9964         | 131.8  | 110.9                    | 0.9       | 115.3                    | 5.0       | 104.1                   | 1.8       | 97.3                     | 18.6      | 98.8                     | 13.5      | 100.4                   | 9.6       |
| 271 | Vinclozolin | 0.001 | 0.002 | 0.9982         | 83.6   | 117.4                    | 2.2       | 117.5                    | 1.4       | 104.6                   | 1.7       | 92.3                     | 15.2      | 94.5                     | 11.4      | 96.4                    | 7.5       |
| 272 | Zoxamide    | 0.001 | 0.004 | 0.9989         | >500   | 93.8                     | 16.7      | 79.9                     | 6.2       | 77.2                    | 3.3       | 104.6                    | 18.1      | 94.2                     | 18.9      | 92.0                    | 13.8      |

Table S3. Method validation parameter of 272 pesticides in soybean.

| No. | Analyte           | LOD   | LOQ   | R <sup>2</sup> | ME.(%) | Repeatability (n=5)      |           |                          |           |                         |           | Reproducibility (n=11)   |           |                          |           |                         |           |
|-----|-------------------|-------|-------|----------------|--------|--------------------------|-----------|--------------------------|-----------|-------------------------|-----------|--------------------------|-----------|--------------------------|-----------|-------------------------|-----------|
|     |                   |       |       |                |        | 0.01 mg kg <sup>-1</sup> |           | 0.02 mg kg <sup>-1</sup> |           | 0.1 mg kg <sup>-1</sup> |           | 0.01 mg kg <sup>-1</sup> |           | 0.02 mg kg <sup>-1</sup> |           | 0.1 mg kg <sup>-1</sup> |           |
|     |                   |       |       |                |        | Rec.<br>(%)              | CV<br>(%) | Rec.<br>(%)              | CV<br>(%) | Rec.<br>(%)             | CV<br>(%) | Rec.<br>(%)              | CV<br>(%) | Rec.<br>(%)              | CV<br>(%) | Rec.<br>(%)             | CV<br>(%) |
| 1   | 2,6-DIPN          | 0.003 | 0.008 | 0.9967         | 72.2   | 76.9                     | 7.7       | 71.3                     | 9.4       | 61.0                    | 9.5       | 74.8                     | 24.1      | 84.6                     | 9.0       | 61.0                    | 9.1       |
| 2   | Acetochlor        | 0.001 | 0.003 | 0.9996         | 43.8   | 68.8                     | 10.5      | 80.6                     | 5.3       | 88.0                    | 11.9      | 97.8                     | 19.3      | 98.8                     | 8.2       | 95.4                    | 8.5       |
|     | EMA               | 0.001 | 0.003 | 0.9985         | 60.7   | 41.5                     | 22.9      | 64.7                     | 16.9      | 80.3                    | 18.7      | 81.4                     | 26.1      | 86.2                     | 16.3      | 89.1                    | 9.2       |
|     | HEMA              | 0.002 | 0.005 | 0.9996         | >500   | 46.1                     | 12.2      | 62.2                     | 9.6       | 85.6                    | 16.0      | 97.2                     | 65.8      | 50.5                     | 59.6      | 62.7                    | 37.2      |
| 3   | Acrinathrin       | 0.001 | 0.004 | 0.9994         | 50.3   | 75.6                     | 8.7       | 92.7                     | 6.2       | 96.7                    | 2.2       | 85.4                     | 57.8      | 87.5                     | 45.0      | 102.7                   | 39.4      |
| 4   | Alachlor          | 0.001 | 0.004 | 0.9994         | 38.0   | 70.6                     | 8.7       | 83.9                     | 4.8       | 82.8                    | 1.9       | 86.2                     | 23.9      | 91.3                     | 12.9      | 93.0                    | 11.1      |
| 5   | Aldrin            | 0.001 | 0.002 | 0.9994         | 35.4   | 42.8                     | 9.6       | 55.2                     | 5.2       | 55.6                    | 2.2       | 35.8                     | 28.0      | 43.6                     | 37.6      | 46.3                    | 28.3      |
|     | Dieldrin          | 0.001 | 0.003 | 0.9970         | 23.3   | 63.3                     | 8.6       | 76.5                     | 4.3       | 74.2                    | 2.6       | 56.0                     | 18.4      | 62.9                     | 30.5      | 67.0                    | 15.1      |
| 6   | Allidochlor       | 0.001 | 0.004 | 0.9994         | 75.8   | 76.8                     | 11.0      | 95.8                     | 5.5       | 91.9                    | 6.5       | 96.8                     | 11.0      | 100.6                    | 5.9       | 97.8                    | 3.5       |
| 7   | Ametryn           | 0.001 | 0.002 | 0.9999         | 90.2   | 88.3                     | 12.3      | 72.1                     | 7.4       | 86.7                    | 7.1       | 80.6                     | 29.9      | 86.7                     | 14.5      | 88.7                    | 12.7      |
| 8   | Anilofos          | 0.001 | 0.004 | 0.9989         | 157.2  | 98.8                     | 8.3       | 118.2                    | 4.3       | 118.4                   | 3.3       | 52.0                     | 38.1      | 61.5                     | 38.7      | 62.8                    | 25.2      |
| 9   | Aramite           | 0.001 | 0.004 | 0.9999         | 83.5   | 68.0                     | 9.7       | 84.3                     | 4.1       | 89.9                    | 8.8       | 86.4                     | 31.8      | 96.4                     | 9.0       | 93.4                    | 21.8      |
| 10  | Aspon             | 0.001 | 0.003 | 0.9962         | 70.0   | 61.5                     | 8.5       | 74.4                     | 3.3       | 84.3                    | 16.1      | 82.8                     | 18.3      | 83.1                     | 15.0      | 84.6                    | 12.2      |
| 11  | Atrazine          | 0.002 | 0.005 | 0.9997         | 95.9   | 67.3                     | 10.2      | 80.2                     | 5.0       | 88.4                    | 11.2      | 87.1                     | 20.7      | 90.1                     | 12.9      | 91.9                    | 7.4       |
| 12  | Azaconazole       | 0.002 | 0.005 | 0.9999         | 51.7   | 67.6                     | 9.0       | 83.3                     | 4.5       | 89.4                    | 9.9       | 90.9                     | 19.7      | 92.1                     | 13.2      | 95.0                    | 9.9       |
| 13  | Benfluralin       | 0.001 | 0.002 | 0.9985         | 90.5   | 77.2                     | 7.3       | 84.2                     | 3.0       | 86.7                    | 14.5      | 95.3                     | 17.6      | 88.8                     | 14.4      | 88.9                    | 15.5      |
| 14  | Benfuresate       | 0.001 | 0.004 | 0.9991         | 32.0   | 68.8                     | 8.1       | 81.8                     | 5.3       | 88.7                    | 11.3      | 95.6                     | 17.9      | 93.0                     | 9.8       | 92.2                    | 9.6       |
| 15  | Benodanil         | 0.001 | 0.004 | 0.9995         | 127.8  | 81.9                     | 7.3       | 94.8                     | 4.8       | 94.9                    | 5.2       | 99.4                     | 18.0      | 101.8                    | 9.7       | 106.6                   | 9.6       |
| 16  | Benzoylprop-ethyl | 0.001 | 0.004 | 0.9998         | 64.9   | 65.4                     | 10.5      | 80.8                     | 4.1       | 87.9                    | 11.6      | 88.6                     | 25.5      | 91.3                     | 18.7      | 93.7                    | 16.0      |
| 17  | BHC, $\alpha$ -   | 0.001 | 0.002 | 0.9968         | 7.8    | 69.3                     | 11.5      | 83.4                     | 4.4       | 85.7                    | 14.6      | 82.8                     | 31.7      | 92.0                     | 10.9      | 85.0                    | 16.2      |
|     | BHC, $\beta$ -    | 0.001 | 0.003 | 1.0000         | 35.8   | 78.2                     | 6.2       | 90.2                     | 3.3       | 91.7                    | 9.0       | 89.2                     | 23.7      | 95.5                     | 9.8       | 89.4                    | 13.4      |

| No. | Analyte               | LOD   | LOQ   | R <sup>2</sup> | ME.(%) | Repeatability (n=5)      |           |                          |           |                         |           | Reproducibility (n=11)   |           |                          |           |                         |           |
|-----|-----------------------|-------|-------|----------------|--------|--------------------------|-----------|--------------------------|-----------|-------------------------|-----------|--------------------------|-----------|--------------------------|-----------|-------------------------|-----------|
|     |                       |       |       |                |        | 0.01 mg kg <sup>-1</sup> |           | 0.02 mg kg <sup>-1</sup> |           | 0.1 mg kg <sup>-1</sup> |           | 0.01 mg kg <sup>-1</sup> |           | 0.02 mg kg <sup>-1</sup> |           | 0.1 mg kg <sup>-1</sup> |           |
|     |                       |       |       |                |        | Rec.<br>(%)              | CV<br>(%) | Rec.<br>(%)              | CV<br>(%) | Rec.<br>(%)             | CV<br>(%) | Rec.<br>(%)              | CV<br>(%) | Rec.<br>(%)              | CV<br>(%) | Rec.<br>(%)             | CV<br>(%) |
|     | BHC, $\delta$ -       | 0.002 | 0.005 | 0.9986         | -59.4  | 80.7                     | 8.6       | 87.9                     | 8.5       | 86.6                    | 19.2      | 91.7                     | 20.5      | 89.8                     | 19.2      | 84.4                    | 15.0      |
| 18  | BHC, $\gamma$ -       | 0.001 | 0.003 | 0.9991         | 6.3    | 85.4                     | 9.2       | 99.5                     | 4.9       | 90.9                    | 4.0       | 59.0                     | 5.6       | 64.3                     | 24.9      | 64.3                    | 29.5      |
| 19  | Bifenox               | 0.001 | 0.003 | 0.9989         | 130.4  | 117.4                    | 16.9      | 75.5                     | 10.3      | 90.3                    | 8.2       | 123.9                    | 33.4      | 127.7                    | 50.3      | 133.0                   | 51.7      |
| 20  | Bifenthrin            | 0.001 | 0.004 | 0.9999         | 120.1  | 102.3                    | 8.9       | 113.0                    | 9.3       | 116.2                   | 3.8       | 91.2                     | 29.6      | 77.3                     | 28.1      | 77.9                    | 28.0      |
| 21  | Boscalid              | 0.001 | 0.004 | 0.9999         | 281.5  | 70.8                     | 9.0       | 86.8                     | 4.9       | 92.3                    | 7.2       | 91.4                     | 21.1      | 95.0                     | 19.7      | 97.5                    | 13.8      |
| 22  | Bromobutide           | 0.001 | 0.003 | 0.9951         | 32.6   | 77.4                     | 8.8       | 87.3                     | 5.4       | 91.1                    | 8.8       | 91.5                     | 17.5      | 90.1                     | 20.0      | 93.3                    | 13.8      |
| 23  | Bromophos-methyl      | 0.001 | 0.004 | 0.9982         | 55.9   | 66.0                     | 8.5       | 77.5                     | 3.2       | 84.1                    | 16.7      | 79.0                     | 24.2      | 84.8                     | 11.1      | 88.4                    | 6.6       |
| 24  | Bromophos-ethyl       | 0.001 | 0.003 | 0.9982         | 59.9   | 88.1                     | 15.9      | 96.1                     | 4.0       | 108.0                   | 5.3       | 79.9                     | 22.6      | 83.3                     | 14.2      | 82.6                    | 14.3      |
| 25  | Bromopropylate        | 0.001 | 0.003 | 0.9993         | 189.9  | 63.3                     | 8.9       | 75.8                     | 3.5       | 83.9                    | 17.0      | 84.0                     | 36.2      | 88.9                     | 21.2      | 88.8                    | 26.0      |
| 26  | Bupirimate            | 0.001 | 0.003 | 1.0000         | 79.7   | 66.7                     | 9.7       | 83.2                     | 3.2       | 88.3                    | 11.2      | 96.4                     | 20.8      | 89.5                     | 19.2      | 93.8                    | 12.8      |
| 27  | Buprofezin            | 0.001 | 0.002 | 0.9998         | 50.2   | 60.6                     | 9.7       | 74.2                     | 4.6       | 83.4                    | 17.5      | 80.8                     | 27.4      | 89.0                     | 11.6      | 84.4                    | 19.0      |
| 28  | Butachlor             | 0.001 | 0.003 | 0.9999         | 72.8   | 67.7                     | 11.7      | 79.7                     | 5.5       | 87.5                    | 13.0      | 85.2                     | 25.0      | 91.9                     | 9.7       | 92.2                    | 16.2      |
| 29  | Butafenacil           | 0.001 | 0.003 | 0.9987         | 249.4  | 76.3                     | 8.6       | 90.2                     | 5.0       | 91.5                    | 8.2       | 96.6                     | 18.4      | 96.7                     | 21.9      | 97.7                    | 20.1      |
| 30  | Butralin              | 0.001 | 0.003 | 0.9993         | 74.6   | 75.7                     | 5.8       | 77.5                     | 3.3       | 85.0                    | 17.4      | 88.8                     | 10.6      | 86.2                     | 17.1      | 88.8                    | 24.2      |
| 31  | Butylate              | 0.001 | 0.003 | 0.9999         | 70.5   | 52.9                     | 19.6      | 79.7                     | 5.8       | 79.2                    | 5.2       | 59.7                     | 19.8      | 66.0                     | 21.5      | 68.4                    | 15.6      |
| 32  | Cadusafos             | 0.001 | 0.004 | 0.9994         | 140.1  | 64.5                     | 11.5      | 79.5                     | 4.3       | 85.5                    | 14.1      | 83.6                     | 25.7      | 96.7                     | 7.5       | 88.6                    | 13.0      |
| 33  | Carbophenothion       | 0.001 | 0.004 | 0.9999         | 117.8  | 66.5                     | 7.0       | 76.9                     | 2.9       | 84.8                    | 15.6      | 85.6                     | 29.9      | 87.4                     | 15.9      | 89.9                    | 19.4      |
| 34  | Carboxin              | 0.001 | 0.004 | 0.9999         | 100.5  | 61.2                     | 10.6      | 77.0                     | 5.5       | 87.8                    | 12.0      | 91.1                     | 26.3      | 92.6                     | 16.0      | 96.5                    | 16.6      |
| 35  | Carfentrazone-ethyl   | 0.001 | 0.003 | 0.9993         | 87.8   | 83.7                     | 6.7       | 98.4                     | 4.5       | 97.5                    | 2.6       | 86.2                     | 21.1      | 94.2                     | 39.3      | 97.8                    | 31.9      |
| 36  | Chinomethionat        | 0.001 | 0.004 | 0.9997         | -23.1  | 71.9                     | 7.0       | 83.7                     | 7.9       | 88.8                    | 12.4      | 60.4                     | 27.9      | 62.0                     | 44.6      | 58.5                    | 57.5      |
| 37  | Chlorbenside          | 0.001 | 0.003 | 0.9999         | 58.8   | 49.6                     | 8.3       | 62.6                     | 4.2       | 64.3                    | 1.9       | 42.5                     | 23.8      | 53.5                     | 24.1      | 59.2                    | 12.4      |
| 38  | Chlorbufam            | 0.002 | 0.005 | 0.9980         | 126.3  | 77.9                     | 10.4      | 95.1                     | 7.1       | 95.8                    | 3.1       | 86.7                     | 4.5       | 87.4                     | 18.3      | 90.2                    | 16.4      |
| 39  | Chlordane- <i>cis</i> | 0.001 | 0.003 | 0.9962         | 37.4   | 112.2                    | 9.8       | 96.9                     | 2.1       | 107.7                   | 6.4       | 75.1                     | 25.8      | 74.2                     | 24.0      | 81.5                    | 15.5      |

| No. | Analyte                 | LOD   | LOQ   | R <sup>2</sup> | ME.(%) | Repeatability (n=5)      |           |                          |           |                         |           | Reproducibility (n=11)   |           |                          |           |                         |           |
|-----|-------------------------|-------|-------|----------------|--------|--------------------------|-----------|--------------------------|-----------|-------------------------|-----------|--------------------------|-----------|--------------------------|-----------|-------------------------|-----------|
|     |                         |       |       |                |        | 0.01 mg kg <sup>-1</sup> |           | 0.02 mg kg <sup>-1</sup> |           | 0.1 mg kg <sup>-1</sup> |           | 0.01 mg kg <sup>-1</sup> |           | 0.02 mg kg <sup>-1</sup> |           | 0.1 mg kg <sup>-1</sup> |           |
|     |                         |       |       |                |        | Rec.<br>(%)              | CV<br>(%) | Rec.<br>(%)              | CV<br>(%) | Rec.<br>(%)             | CV<br>(%) | Rec.<br>(%)              | CV<br>(%) | Rec.<br>(%)              | CV<br>(%) | Rec.<br>(%)             | CV<br>(%) |
|     | Chlordane- <i>trans</i> | 0.001 | 0.002 | 0.9968         | 25.9   | 109.9                    | 7.4       | 95.2                     | 3.0       | 107.6                   | 5.2       | 74.2                     | 26.8      | 73.5                     | 24.9      | 80.6                    | 15.8      |
| 40  | Chlorethoxyfos          | 0.001 | 0.002 | 0.9982         | 55.7   | 62.3                     | 11.6      | 84.5                     | 2.7       | 87.3                    | 9.6       | 84.2                     | 24.2      | 88.6                     | 14.4      | 89.6                    | 16.0      |
| 41  | Chlorfenapyr            | 0.001 | 0.004 | 0.9997         | 66.4   | 70.1                     | 10.7      | 85.8                     | 4.3       | 89.5                    | 9.6       | 88.9                     | 16.3      | 90.7                     | 11.5      | 90.4                    | 16.7      |
| 42  | Chlorfenson             | 0.001 | 0.003 | 0.9989         | 55.7   | 63.5                     | 9.6       | 81.9                     | 4.3       | 88.3                    | 11.2      | 93.0                     | 16.5      | 89.7                     | 14.6      | 89.6                    | 13.4      |
| 43  | Chlorflurenol-methyl    | 0.001 | 0.004 | 0.9999         | 141.5  | 68.7                     | 8.5       | 84.1                     | 4.7       | 90.1                    | 9.7       | 94.6                     | 21.2      | 93.4                     | 15.4      | 96.6                    | 14.5      |
| 44  | Chlornitrofen           | 0.001 | 0.004 | 0.9995         | 93.7   | 101.3                    | 5.9       | 107.0                    | 3.6       | 99.3                    | 2.9       | 98.3                     | 24.9      | 98.0                     | 23.3      | 88.2                    | 22.5      |
| 45  | Chlorobenzilate         | 0.001 | 0.004 | 0.9998         | 83.4   | 65.9                     | 10.0      | 80.7                     | 3.9       | 86.0                    | 14.0      | 87.0                     | 28.0      | 94.0                     | 11.4      | 88.1                    | 21.0      |
| 46  | Chloropropylate         | 0.001 | 0.003 | 0.9998         | 79.9   | 65.9                     | 10.0      | 80.7                     | 3.9       | 86.0                    | 14.0      | 84.8                     | 31.3      | 94.1                     | 11.3      | 92.3                    | 14.4      |
| 47  | Chloroneb               | 0.001 | 0.003 | 0.9993         | 72.6   | 64.6                     | 13.6      | 80.8                     | 5.1       | 85.0                    | 14.0      | 77.5                     | 25.5      | 87.0                     | 15.5      | 88.0                    | 5.6       |
| 48  | Chlorothalonil          | 0.002 | 0.007 | 0.9934         | -63.1  | 74.7                     | 14.3      | 69.3                     | 10.1      | 71.8                    | 44.0      | 49.8                     | 84.7      | 61.4                     | 26.1      | 95.4                    | 94.0      |
| 49  | Chlorpropham            | 0.001 | 0.003 | 0.9995         | 160.1  | 62.6                     | 11.3      | 79.6                     | 4.3       | 86.3                    | 13.1      | 86.2                     | 22.6      | 88.3                     | 12.3      | 91.8                    | 9.7       |
| 50  | Chlorpyrifos            | 0.001 | 0.003 | 0.9988         | 44.0   | 60.1                     | 8.7       | 72.7                     | 3.5       | 83.1                    | 17.8      | 78.8                     | 26.6      | 86.2                     | 12.6      | 84.4                    | 15.6      |
| 51  | Chlorpyrifos-methyl     | 0.001 | 0.004 | 0.9994         | 62.9   | 71.8                     | 7.8       | 84.1                     | 4.5       | 88.3                    | 11.9      | 87.8                     | 17.5      | 89.3                     | 12.1      | 87.4                    | 12.2      |
| 52  | Chlorthal-dimethyl      | 0.001 | 0.003 | 0.9959         | 32.7   | 62.2                     | 10.3      | 76.5                     | 3.5       | 85.1                    | 15.1      | 80.1                     | 26.4      | 90.7                     | 9.1       | 85.3                    | 16.2      |
| 53  | Chlorthion              | 0.001 | 0.003 | 0.9973         | 172.4  | 93.3                     | 5.7       | 102.3                    | 3.6       | 97.9                    | 4.1       | 101.2                    | 19.8      | 94.5                     | 21.4      | 97.9                    | 19.6      |
| 54  | Chlorthiophos           | 0.001 | 0.003 | 0.9999         | 73.0   | 63.6                     | 9.4       | 76.9                     | 3.6       | 84.7                    | 15.4      | 80.6                     | 28.5      | 86.8                     | 14.4      | 87.7                    | 16.0      |
| 55  | Chlozolate              | 0.001 | 0.004 | 0.9994         | 25.5   | 64.9                     | 11.3      | 82.0                     | 5.5       | 89.6                    | 9.6       | 83.6                     | 28.9      | 89.9                     | 17.0      | 92.4                    | 15.4      |
| 56  | Cinmethylin             | 0.002 | 0.005 | 0.9968         | 76.2   | 103.6                    | 13.8      | 119.7                    | 13.7      | 119.0                   | 3.8       | 90.5                     | 28.6      | 86.7                     | 21.2      | 82.5                    | 15.0      |
| 57  | Clomazone               | 0.001 | 0.003 | 0.9997         | 81.3   | 68.2                     | 10.1      | 87.7                     | 4.6       | 90.7                    | 7.6       | 88.6                     | 14.1      | 96.0                     | 4.0       | 96.8                    | 2.1       |
| 58  | Coumaphos               | 0.001 | 0.003 | 0.9989         | 244.8  | 116.5                    | 24.0      | 106.3                    | 14.1      | 107.7                   | 7.3       | 104.0                    | 7.7       | 83.4                     | 20.0      | 105.3                   | 21.0      |
| 59  | Cyanophos               | 0.001 | 0.004 | 0.9997         | 81.3   | 80.6                     | 8.5       | 94.2                     | 4.2       | 94.6                    | 4.5       | 92.5                     | 4.5       | 94.0                     | 11.9      | 95.9                    | 8.8       |
| 60  | Cyflufenamid            | 0.001 | 0.003 | 0.9999         | 113.2  | 73.8                     | 9.3       | 87.2                     | 3.1       | 89.5                    | 10.2      | 90.0                     | 16.1      | 97.8                     | 4.3       | 96.0                    | 17.7      |
| 61  | Cyfluthrin              | 0.001 | 0.003 | 0.9997         | 188.7  | 81.5                     | 8.0       | 98.1                     | 4.7       | 97.9                    | 1.6       | 90.4                     | 32.1      | 95.2                     | 30.7      | 104.1                   | 35.3      |

| No. | Analyte                  | LOD   | LOQ   | R <sup>2</sup> | ME.(%) | Repeatability (n=5)      |           |                          |           |                         |           | Reproducibility (n=11)   |           |                          |           |                         |           |
|-----|--------------------------|-------|-------|----------------|--------|--------------------------|-----------|--------------------------|-----------|-------------------------|-----------|--------------------------|-----------|--------------------------|-----------|-------------------------|-----------|
|     |                          |       |       |                |        | 0.01 mg kg <sup>-1</sup> |           | 0.02 mg kg <sup>-1</sup> |           | 0.1 mg kg <sup>-1</sup> |           | 0.01 mg kg <sup>-1</sup> |           | 0.02 mg kg <sup>-1</sup> |           | 0.1 mg kg <sup>-1</sup> |           |
|     |                          |       |       |                |        | Rec.<br>(%)              | CV<br>(%) | Rec.<br>(%)              | CV<br>(%) | Rec.<br>(%)             | CV<br>(%) | Rec.<br>(%)              | CV<br>(%) | Rec.<br>(%)              | CV<br>(%) | Rec.<br>(%)             | CV<br>(%) |
| 62  | Cyhalofop-butyl          | 0.001 | 0.003 | 0.9995         | 200.1  | 71.4                     | 7.1       | 84.2                     | 3.5       | 88.8                    | 11.1      | 89.5                     | 23.0      | 91.2                     | 22.0      | 91.9                    | 16.7      |
| 63  | Cyhalothrin, $\gamma$ -  | 0.001 | 0.004 | 1.0000         | 113.4  | 69.7                     | 7.9       | 86.9                     | 3.9       | 92.2                    | 6.9       | 74.0                     | 32.1      | 78.8                     | 32.7      | 83.7                    | 34.4      |
|     | Cyhalothrin, $\lambda$ - | 0.001 | 0.004 | 0.9995         | 220.1  | 78.1                     | 8.5       | 92.5                     | 4.1       | 94.8                    | 4.4       | 74.9                     | 38.5      | 79.4                     | 38.6      | 84.5                    | 39.2      |
| 64  | Cypermethrin             | 0.001 | 0.003 | 0.9998         | 160.4  | 82.9                     | 7.7       | 98.0                     | 4.6       | 97.3                    | 2.6       | 88.6                     | 35.0      | 92.9                     | 33.2      | 104.3                   | 38.1      |
| 65  | Cyprazine                | 0.001 | 0.004 | 0.9985         | 49.6   | 62.9                     | 9.7       | 77.2                     | 5.3       | 87.5                    | 12.0      | 82.8                     | 21.5      | 89.2                     | 10.9      | 90.9                    | 13.2      |
| 66  | Cyprodinil               | 0.001 | 0.003 | 0.9990         | 59.4   | 103.5                    | 11.5      | 71.2                     | 6.6       | 83.8                    | 6.8       | 76.7                     | 27.0      | 80.4                     | 18.2      | 82.2                    | 18.3      |
| 67  | DDD, $p,p'$ -            | 0.001 | 0.003 | 0.9999         | 13.0   | 61.3                     | 7.2       | 73.0                     | 4.2       | 82.2                    | 19.1      | 71.9                     | 44.5      | 76.6                     | 35.3      | 78.2                    | 33.3      |
|     | DDE, $p,p'$ -            | 0.001 | 0.002 | 0.9985         | 52.5   | 91.2                     | 8.2       | 108.4                    | 4.5       | 106.7                   | 1.2       | 54.0                     | 49.0      | 60.4                     | 41.1      | 62.8                    | 34.1      |
|     | DDT, $o,p'$ -            | 0.001 | 0.003 | 0.9986         | 3.1    | 72.8                     | 16.1      | 67.6                     | 14.0      | 80.2                    | 32.8      | 71.8                     | 34.8      | 71.3                     | 30.6      | 67.4                    | 21.9      |
|     | DDT, $p,p'$ -            | 0.001 | 0.004 | 0.9991         | -0.9   | 71.3                     | 21.3      | 74.2                     | 19.0      | 85.1                    | 32.9      | 74.6                     | 36.5      | 75.1                     | 34.5      | 73.4                    | 39.0      |
| 68  | Deltamethrin             | 0.002 | 0.005 | 0.9999         | 446.9  | 106.8                    | 1.7       | 96.3                     | 7.1       | 105.2                   | 4.5       | 84.8                     | 31.7      | 99.4                     | 21.9      | 94.2                    | 24.6      |
| 69  | Desmetryn                | 0.001 | 0.003 | 0.9985         | 62.9   | 63.2                     | 10.1      | 75.7                     | 4.5       | 86.1                    | 14.4      | 89.8                     | 19.1      | 91.9                     | 7.3       | 93.4                    | 8.4       |
| 70  | Dialifor                 | 0.001 | 0.003 | 0.9988         | 52.2   | 90.8                     | 8.5       | 101.6                    | 5.3       | 98.1                    | 1.5       | 84.6                     | 28.6      | 86.9                     | 17.6      | 97.6                    | 24.1      |
| 71  | Di-Allate                | 0.001 | 0.002 | 0.9998         | 74.0   | 113.6                    | 10.8      | 74.2                     | 11.2      | 86.0                    | 9.4       | 73.7                     | 27.0      | 86.6                     | 8.0       | 85.6                    | 11.4      |
| 72  | Diazinon                 | 0.001 | 0.003 | 0.9995         | 63.1   | 68.0                     | 9.4       | 79.7                     | 4.0       | 86.0                    | 14.3      | 83.9                     | 15.4      | 86.1                     | 14.4      | 87.6                    | 16.5      |
| 73  | Dichlobenil              | 0.001 | 0.002 | 0.9994         | 48.7   | 63.0                     | 13.4      | 81.2                     | 5.3       | 86.0                    | 13.1      | 84.4                     | 15.9      | 88.5                     | 9.9       | 88.6                    | 7.4       |
| 74  | Dichlofenthion           | 0.001 | 0.003 | 0.9988         | 43.1   | 69.2                     | 9.3       | 81.0                     | 3.0       | 79.5                    | 1.8       | 57.8                     | 50.1      | 62.9                     | 46.3      | 64.7                    | 36.0      |
| 75  | Dichlofluanid            | 0.001 | 0.004 | 0.9482         | 28.1   | 101.5                    | 8.7       | 92.3                     | 7.6       | 86.7                    | 18.0      | 82.6                     | 87.6      | 80.4                     | 89.5      | 92.1                    | 106.6     |
| 76  | Dichlormid               | 0.001 | 0.003 | 0.9992         | 73.7   | 80.8                     | 8.8       | 99.3                     | 5.1       | 93.4                    | 5.1       | 99.2                     | 8.5       | 102.6                    | 6.5       | 101.9                   | 2.7       |
| 77  | Diclobutrazol            | 0.002 | 0.005 | 0.9999         | 309.4  | 65.3                     | 10.9      | 81.6                     | 5.3       | 88.3                    | 11.1      | 92.2                     | 20.7      | 92.8                     | 15.4      | 89.5                    | 7.7       |
| 78  | Diclofop-methyl          | 0.001 | 0.003 | 0.9998         | 106.8  | 67.9                     | 8.3       | 79.9                     | 3.6       | 86.5                    | 13.6      | 85.3                     | 20.8      | 93.1                     | 10.1      | 95.0                    | 12.8      |
| 79  | Dicloran                 | 0.001 | 0.003 | 0.9991         | 91.6   | 121.1                    | 2.3       | 133.9                    | 4.0       | 130.2                   | 2.7       | 57.3                     | 24.6      | 63.8                     | 34.3      | 96.7                    | 14.1      |
| 80  | Dicofol                  | 0.001 | 0.003 | 0.9995         | 40.4   | 79.7                     | 11.8      | 75.2                     | 5.2       | 76.7                    | 5.1       | 76.6                     | 21.0      | 77.0                     | 14.7      | 82.9                    | 13.8      |

| No. | Analyte                | LOD   | LOQ   | R <sup>2</sup> | ME.(%) | Repeatability (n=5)      |           |                          |           |                         |           | Reproducibility (n=11)   |           |                          |           |                         |           |
|-----|------------------------|-------|-------|----------------|--------|--------------------------|-----------|--------------------------|-----------|-------------------------|-----------|--------------------------|-----------|--------------------------|-----------|-------------------------|-----------|
|     |                        |       |       |                |        | 0.01 mg kg <sup>-1</sup> |           | 0.02 mg kg <sup>-1</sup> |           | 0.1 mg kg <sup>-1</sup> |           | 0.01 mg kg <sup>-1</sup> |           | 0.02 mg kg <sup>-1</sup> |           | 0.1 mg kg <sup>-1</sup> |           |
|     |                        |       |       |                |        | Rec.<br>(%)              | CV<br>(%) | Rec.<br>(%)              | CV<br>(%) | Rec.<br>(%)             | CV<br>(%) | Rec.<br>(%)              | CV<br>(%) | Rec.<br>(%)              | CV<br>(%) | Rec.<br>(%)             | CV<br>(%) |
| 81  | Diclotophos            | 0.002 | 0.006 | 0.9966         | 421.9  | 86.7                     | 11.6      | 106.8                    | 9.0       | 101.2                   | 5.3       | 106.3                    | 8.6       | 104.1                    | 12.5      | 103.4                   | 12.3      |
| 82  | Diethatyl-ethyl        | 0.001 | 0.004 | 0.9985         | 86.6   | 78.2                     | 8.9       | 93.6                     | 3.9       | 92.0                    | 7.0       | 98.5                     | 10.5      | 101.5                    | 2.8       | 100.3                   | 10.8      |
| 83  | Diethofencarb          | 0.001 | 0.004 | 0.9994         | 196.6  | 119.0                    | 8.6       | 74.0                     | 9.9       | 88.9                    | 7.5       | 89.0                     | 24.8      | 88.5                     | 18.9      | 94.6                    | 17.2      |
| 84  | Difenoconazole         | 0.002 | 0.006 | 0.9992         | 315.5  | 77.3                     | 7.9       | 90.5                     | 3.8       | 91.6                    | 8.3       | 96.5                     | 20.2      | 97.8                     | 22.3      | 98.3                    | 19.7      |
| 85  | Diflufenican           | 0.001 | 0.004 | 0.9999         | 187.0  | 67.7                     | 8.5       | 79.5                     | 3.6       | 86.6                    | 13.7      | 87.7                     | 24.5      | 88.9                     | 21.2      | 93.5                    | 22.2      |
| 86  | Dimepiperate           | 0.001 | 0.004 | 0.9989         | 67.3   | 118.2                    | 10.3      | 72.1                     | 15.4      | 81.8                    | 6.6       | 80.5                     | 22.9      | 89.0                     | 10.4      | 85.9                    | 20.4      |
| 87  | Dimethachlor           | 0.001 | 0.003 | 0.9951         | 38.5   | 75.3                     | 8.7       | 89.9                     | 5.2       | 93.0                    | 6.4       | 92.9                     | 10.9      | 95.4                     | 9.2       | 96.1                    | 10.1      |
| 88  | Dimethametryn          | 0.001 | 0.004 | 0.9998         | 60.2   | 106.6                    | 11.6      | 72.0                     | 9.2       | 86.0                    | 6.9       | 96.0                     | 15.6      | 83.2                     | 19.3      | 86.3                    | 19.2      |
| 89  | Dimethenamid           | 0.001 | 0.003 | 0.9996         | 56.3   | 70.5                     | 8.8       | 84.0                     | 4.8       | 90.0                    | 9.6       | 90.9                     | 13.6      | 90.5                     | 11.9      | 93.6                    | 11.7      |
| 90  | Dimethipin             | 0.003 | 0.008 | 0.9997         | -29.2  | 86.4                     | 15.0      | 99.8                     | 14.0      | 102.5                   | 9.6       | 105.5                    | 13.4      | 105.0                    | 14.8      | 106.2                   | 11.3      |
| 91  | Dimethomorph (E)       | 0.002 | 0.005 | 0.9998         | 454.6  | 80.3                     | 7.0       | 92.8                     | 5.3       | 94.9                    | 4.9       | 101.5                    | 20.3      | 99.4                     | 21.5      | 106.6                   | 24.9      |
|     | Dimethomorph (Z)       | 0.001 | 0.004 | 0.9999         | 441.5  | 81.1                     | 6.4       | 93.5                     | 5.0       | 94.8                    | 5.0       | 103.6                    | 18.4      | 101.2                    | 18.7      | 108.0                   | 23.1      |
| 92  | Dimethylvinphos (E)    | 0.002 | 0.005 | 0.9991         | 152.9  | 88.1                     | 7.4       | 102.5                    | 5.2       | 99.0                    | 2.6       | 97.2                     | 11.8      | 97.4                     | 20.9      | 100.5                   | 16.4      |
|     | Dimethylvinphos (Z)    | 0.001 | 0.004 | 0.9992         | 233.8  | 83.0                     | 8.6       | 98.0                     | 5.3       | 98.5                    | 3.7       | 96.6                     | 10.6      | 97.8                     | 15.1      | 99.9                    | 16.4      |
| 93  | Diniconazole           | 0.001 | 0.004 | 0.9989         | 281.4  | 64.4                     | 9.2       | 79.0                     | 3.8       | 87.0                    | 12.6      | 90.4                     | 24.7      | 90.2                     | 20.9      | 87.8                    | 9.7       |
| 94  | Dinitramine            | 0.001 | 0.003 | 0.9996         | 74.7   | 79.5                     | 8.5       | 85.5                     | 3.0       | 89.4                    | 11.1      | 87.3                     | 19.3      | 94.4                     | 1.0       | 93.7                    | 20.1      |
| 95  | Dioxathion             | 0.001 | 0.003 | 0.9999         | 56.4   | 74.4                     | 8.9       | 85.6                     | 5.8       | 88.9                    | 9.8       | 86.6                     | 5.9       | 92.4                     | 2.8       | 90.6                    | 14.1      |
| 96  | Diphenamid             | 0.001 | 0.003 | 0.9996         | 39.7   | 91.7                     | 2.9       | 83.1                     | 8.7       | 94.0                    | 6.9       | 87.9                     | 22.8      | 89.5                     | 11.9      | 93.6                    | 10.6      |
| 97  | Diphenylamine          | 0.001 | 0.002 | 0.9993         | 95.9   | 95.3                     | 15.7      | 70.7                     | 2.7       | 82.1                    | 17.2      | 72.5                     | 29.9      | 82.4                     | 12.1      | 82.0                    | 14.5      |
| 98  | Dithiopyr              | 0.001 | 0.003 | 0.9996         | 51.1   | 68.4                     | 8.4       | 80.0                     | 2.5       | 86.3                    | 14.0      | 88.0                     | 15.4      | 87.3                     | 17.0      | 88.6                    | 17.2      |
| 99  | Edifenphos             | 0.002 | 0.006 | 0.9990         | 252.6  | 87.0                     | 8.7       | 105.4                    | 5.8       | 102.0                   | 4.5       | 105.3                    | 12.1      | 101.2                    | 23.9      | 77.0                    | 23.9      |
| 100 | Endosulfan, $\alpha$ - | 0.001 | 0.002 | 0.9998         | 46.3   | 60.5                     | 8.9       | 71.3                     | 3.1       | 116.5                   | 6.5       | 88.8                     | 21.3      | 86.5                     | 9.8       | 90.6                    | 10.8      |
|     | Endosulfan, $\beta$ -  | 0.001 | 0.004 | 0.9995         | 16.0   | 69.3                     | 7.0       | 81.3                     | 3.5       | 85.8                    | 14.0      | 86.6                     | 17.5      | 88.2                     | 13.5      | 86.5                    | 30.2      |

| No. | Analyte              | LOD   | LOQ   | R <sup>2</sup> | ME.(%) | Repeatability (n=5)      |           |                          |           |                         |           | Reproducibility (n=11)   |           |                          |           |                         |           |
|-----|----------------------|-------|-------|----------------|--------|--------------------------|-----------|--------------------------|-----------|-------------------------|-----------|--------------------------|-----------|--------------------------|-----------|-------------------------|-----------|
|     |                      |       |       |                |        | 0.01 mg kg <sup>-1</sup> |           | 0.02 mg kg <sup>-1</sup> |           | 0.1 mg kg <sup>-1</sup> |           | 0.01 mg kg <sup>-1</sup> |           | 0.02 mg kg <sup>-1</sup> |           | 0.1 mg kg <sup>-1</sup> |           |
|     |                      |       |       |                |        | Rec.<br>(%)              | CV<br>(%) | Rec.<br>(%)              | CV<br>(%) | Rec.<br>(%)             | CV<br>(%) | Rec.<br>(%)              | CV<br>(%) | Rec.<br>(%)              | CV<br>(%) | Rec.<br>(%)             | CV<br>(%) |
|     | Endosulfan, sulfate- | 0.001 | 0.003 | 0.9999         | 27.3   | 104.1                    | 10.6      | 99.8                     | 2.8       | 112.4                   | 5.2       | 85.3                     | 33.7      | 85.5                     | 23.2      | 86.6                    | 30.0      |
| 101 | Endrin               | 0.001 | 0.003 | 0.9989         | 40.4   | 80.9                     | 12.8      | 72.5                     | 1.4       | 78.1                    | 5.5       | 84.3                     | 24.3      | 83.6                     | 12.0      | 86.5                    | 15.0      |
|     | δ-keto-Endrin        | 0.001 | 0.004 | 0.9996         | 24.3   | 77.8                     | 6.6       | 75.3                     | 8.3       | 78.5                    | 5.5       | 90.4                     | 9.9       | 87.3                     | 5.5       | 92.3                    | 7.2       |
| 102 | EPN                  | 0.001 | 0.002 | 0.9993         | 146.4  | 100.4                    | 6.3       | 107.9                    | 4.4       | 101.2                   | 1.6       | 104.0                    | 11.7      | 100.5                    | 22.1      | 96.9                    | 21.0      |
| 103 | Epoxiconazole        | 0.001 | 0.004 | 0.9997         | 105.1  | 74.1                     | 7.6       | 87.4                     | 3.7       | 92.2                    | 7.1       | 96.6                     | 14.1      | 95.9                     | 10.7      | 96.3                    | 7.9       |
| 104 | EPTC                 | 0.001 | 0.003 | 0.9996         | 43.9   | 62.3                     | 15.5      | 79.0                     | 5.7       | 83.3                    | 16.2      | 88.1                     | 18.5      | 91.0                     | 3.9       | 90.4                    | 9.3       |
| 105 | Etaconazole-1        | 0.001 | 0.004 | 0.9993         | 74.2   | 64.3                     | 11.7      | 82.1                     | 3.0       | 88.4                    | 10.3      | 94.3                     | 21.1      | 99.3                     | 7.8       | 97.3                    | 7.6       |
|     | Etaconazole-2        | 0.002 | 0.005 | 0.9993         | 48.4   | 62.8                     | 11.3      | 81.2                     | 5.6       | 89.5                    | 9.9       | 88.0                     | 29.4      | 95.2                     | 7.4       | 98.9                    | 9.5       |
| 106 | Ethalfuralin         | 0.001 | 0.003 | 0.9991         | 89.7   | 76.9                     | 8.0       | 85.1                     | 3.3       | 87.1                    | 12.9      | 87.4                     | 32.5      | 89.8                     | 9.2       | 93.9                    | 11.9      |
| 107 | Ethion               | 0.001 | 0.003 | 0.9996         | 88.3   | 72.3                     | 7.7       | 85.8                     | 3.3       | 89.1                    | 10.1      | 81.7                     | 23.4      | 92.7                     | 6.2       | 93.5                    | 23.8      |
| 108 | Ethofumesate         | 0.001 | 0.003 | 0.9996         | 43.9   | 64.4                     | 10.4      | 78.0                     | 5.2       | 87.5                    | 12.5      | 88.4                     | 19.4      | 90.5                     | 11.8      | 91.9                    | 12.8      |
| 109 | Ethoprophos          | 0.001 | 0.004 | 0.9992         | 151.1  | 67.0                     | 11.1      | 83.0                     | 4.6       | 88.3                    | 10.5      | 92.4                     | 16.9      | 90.6                     | 13.1      | 92.6                    | 9.0       |
| 110 | Ethychlozate         | 0.002 | 0.006 | 0.9997         | 161.2  | 61.3                     | 5.8       | 74.6                     | 5.6       | 88.3                    | 12.0      | 89.0                     | 24.4      | 91.4                     | 15.4      | 99.3                    | 17.5      |
| 111 | Etoxazole            | 0.001 | 0.004 | 0.9994         | 115.8  | 65.9                     | 7.6       | 76.4                     | 3.2       | 84.8                    | 15.7      | 80.2                     | 29.7      | 93.3                     | 10.3      | 89.3                    | 23.6      |
| 112 | Etridiazole          | 0.001 | 0.002 | 0.9971         | 77.8   | 98.7                     | 16.0      | 97.0                     | 14.5      | 87.2                    | 16.7      | 80.5                     | 18.8      | 88.9                     | 11.6      | 88.6                    | 14.3      |
| 113 | Fenamidone           | 0.001 | 0.004 | 0.9992         | 91.2   | 67.1                     | 12.0      | 79.8                     | 5.8       | 88.3                    | 11.8      | 86.8                     | 23.7      | 96.4                     | 9.0       | 97.7                    | 16.7      |
| 114 | Fenarimol            | 0.001 | 0.004 | 0.9986         | 143.4  | 68.3                     | 8.4       | 80.8                     | 4.1       | 87.9                    | 12.5      | 89.9                     | 22.5      | 93.2                     | 17.4      | 96.5                    | 21.5      |
| 115 | Fenbuconazole        | 0.002 | 0.005 | 0.9993         | 209.8  | 74.1                     | 9.4       | 89.0                     | 4.5       | 91.1                    | 8.4       | 95.8                     | 15.4      | 97.6                     | 15.4      | 97.8                    | 19.8      |
| 116 | Fenchlorphos         | 0.001 | 0.003 | 0.9954         | 53.0   | 66.2                     | 8.4       | 77.2                     | 3.7       | 84.1                    | 16.9      | 89.5                     | 15.9      | 86.4                     | 5.8       | 86.5                    | 8.9       |
| 117 | Fencloirim           | 0.001 | 0.002 | 0.9998         | 79.0   | 53.5                     | 13.4      | 70.2                     | 5.4       | 70.8                    | 3.0       | 51.8                     | 4.8       | 62.4                     | 17.6      | 65.5                    | 11.5      |
| 118 | Fenfuram             | 0.001 | 0.004 | 0.9989         | 66.8   | 65.7                     | 10.0      | 79.9                     | 4.7       | 88.6                    | 11.2      | 91.0                     | 17.8      | 92.7                     | 7.8       | 95.3                    | 7.7       |
| 119 | Fenitrothion         | 0.001 | 0.004 | 0.9988         | 133.7  | 85.0                     | 5.8       | 96.3                     | 3.4       | 95.1                    | 5.4       | 92.8                     | 9.5       | 93.1                     | 16.4      | 101.4                   | 14.8      |
| 120 | Fenobucarb           | 0.002 | 0.005 | 0.9997         | 114.3  | 68.9                     | 9.4       | 93.7                     | 5.6       | 94.3                    | 4.7       | 92.0                     | 16.4      | 98.5                     | 9.8       | 97.6                    | 11.4      |

| No. | Analyte            | LOD   | LOQ   | R <sup>2</sup> | ME.(%) | Repeatability (n=5)      |           |                          |           |                         |           | Reproducibility (n=11)   |           |                          |           |                         |           |
|-----|--------------------|-------|-------|----------------|--------|--------------------------|-----------|--------------------------|-----------|-------------------------|-----------|--------------------------|-----------|--------------------------|-----------|-------------------------|-----------|
|     |                    |       |       |                |        | 0.01 mg kg <sup>-1</sup> |           | 0.02 mg kg <sup>-1</sup> |           | 0.1 mg kg <sup>-1</sup> |           | 0.01 mg kg <sup>-1</sup> |           | 0.02 mg kg <sup>-1</sup> |           | 0.1 mg kg <sup>-1</sup> |           |
|     |                    |       |       |                |        | Rec.<br>(%)              | CV<br>(%) | Rec.<br>(%)              | CV<br>(%) | Rec.<br>(%)             | CV<br>(%) | Rec.<br>(%)              | CV<br>(%) | Rec.<br>(%)              | CV<br>(%) | Rec.<br>(%)             | CV<br>(%) |
| 121 | Fenothiocarb       | 0.001 | 0.003 | 0.9986         | 148.6  | 62.0                     | 10.0      | 76.5                     | 5.2       | 85.4                    | 15.0      | 84.8                     | 23.4      | 90.2                     | 12.6      | 92.1                    | 13.7      |
| 122 | Fenoxanil          | 0.001 | 0.004 | 0.9999         | 360.6  | 93.6                     | 6.8       | 119.2                    | 5.6       | 119.9                   | 6.1       | 49.8                     | 31.5      | 58.0                     | 29.2      | 57.2                    | 20.9      |
| 123 | Fenpropathrin      | 0.001 | 0.003 | 0.9989         | 94.4   | 73.6                     | 6.6       | 84.5                     | 3.2       | 89.0                    | 10.6      | 79.9                     | 32.2      | 83.5                     | 28.0      | 91.6                    | 25.3      |
| 124 | Fenpropimorph      | 0.001 | 0.003 | 0.9998         | 56.9   | 86.2                     | 9.4       | 70.8                     | 10.7      | 77.5                    | 7.1       | 93.0                     | 10.3      | 81.4                     | 17.9      | 85.4                    | 17.1      |
| 125 | Fenpyrazamine      | 0.002 | 0.006 | 0.9991         | 65.2   | 74.9                     | 8.4       | 91.9                     | 9.7       | 97.4                    | 3.1       | 88.7                     | 10.5      | 89.6                     | 15.7      | 105.2                   | 28.4      |
| 126 | Fenson             | 0.001 | 0.003 | 0.9990         | 26.1   | 86.3                     | 7.0       | 84.0                     | 9.9       | 97.3                    | 6.2       | 84.7                     | 21.7      | 86.8                     | 16.1      | 91.2                    | 11.4      |
| 127 | Fenthion           | 0.001 | 0.003 | 0.9984         | 58.6   | 64.8                     | 9.6       | 77.5                     | 4.4       | 86.3                    | 14.0      | 85.2                     | 17.1      | 87.3                     | 11.4      | 87.5                    | 16.7      |
| 128 | Fenvalerate-1      | 0.001 | 0.003 | 0.9998         | 217.6  | 89.4                     | 6.6       | 102.5                    | 4.6       | 98.9                    | 2.0       | 699.3                    | 146.6     | 328.9                    | 115.2     | 130.1                   | 13.4      |
|     | Fenvalerate-2      | 0.001 | 0.003 | 0.9999         | 308.9  | 89.0                     | 6.9       | 103.6                    | 4.6       | 100.3                   | 1.0       | 101.2                    | 13.0      | 101.7                    | 16.2      | 110.2                   | 23.9      |
| 129 | Fipronil           | 0.001 | 0.004 | 0.9994         | 124.0  | 61.3                     | 9.3       | 75.7                     | 5.2       | 86.7                    | 13.6      | 88.7                     | 29.3      | 90.7                     | 21.8      | 95.7                    | 19.4      |
| 130 | Flamprop-isopropyl | 0.001 | 0.003 | 1.0000         | 53.8   | 68.4                     | 10.4      | 84.2                     | 3.5       | 88.6                    | 10.6      | 94.7                     | 18.0      | 97.3                     | 7.8       | 96.1                    | 11.9      |
| 131 | Fluacrypyrim       | 0.001 | 0.003 | 0.9996         | 117.4  | 69.3                     | 9.2       | 85.0                     | 4.1       | 89.1                    | 9.9       | 94.2                     | 18.0      | 93.3                     | 14.4      | 96.4                    | 17.5      |
| 132 | Fluazifop-butyl    | 0.001 | 0.003 | 0.9998         | 109.7  | 68.4                     | 9.7       | 84.1                     | 3.4       | 88.7                    | 10.6      | 86.2                     | 21.1      | 95.8                     | 6.3       | 91.5                    | 20.0      |
| 133 | Fluchloralin       | 0.001 | 0.003 | 0.9996         | 52.9   | 95.0                     | 5.7       | 100.8                    | 3.5       | 96.9                    | 4.7       | 91.5                     | 20.7      | 95.4                     | 17.0      | 96.3                    | 19.6      |
| 134 | Flucythrinate-1    | 0.001 | 0.003 | 0.9997         | 186.2  | 100.9                    | 7.3       | 117.4                    | 4.1       | 115.2                   | 4.3       | 52.0                     | 38.1      | 61.5                     | 38.7      | 62.8                    | 25.2      |
|     | Flucythrinate-2    | 0.001 | 0.004 | 0.9999         | 232.3  | 100.8                    | 7.7       | 117.1                    | 0.5       | 116.2                   | 3.9       | 48.2                     | 41.6      | 61.5                     | 39.5      | 71.3                    | 13.1      |
| 135 | Fluensulfone       | 0.001 | 0.004 | 0.9996         | 127.8  | 67.4                     | 9.9       | 85.8                     | 7.4       | 90.7                    | 7.3       | 89.4                     | 14.5      | 90.1                     | 12.0      | 96.5                    | 5.4       |
| 136 | Flufenpyr-ethyl    | 0.001 | 0.003 | 0.9992         | 92.7   | 78.9                     | 7.5       | 95.4                     | 5.4       | 95.0                    | 3.9       | 106.6                    | 15.4      | 108.1                    | 1.7       | 108.0                   | 9.8       |
| 137 | Flumetralin        | 0.001 | 0.002 | 0.9997         | 73.2   | 85.3                     | 5.7       | 92.3                     | 3.3       | 93.2                    | 7.2       | 90.9                     | 16.8      | 93.0                     | 15.3      | 96.6                    | 22.4      |
| 138 | Flumioxazin        | 0.002 | 0.005 | 0.9998         | 247.2  | 82.8                     | 7.9       | 94.8                     | 5.6       | 96.3                    | 4.0       | 89.5                     | 27.9      | 94.2                     | 22.0      | 106.9                   | 25.5      |
| 139 | Fluopyram          | 0.001 | 0.004 | 0.9996         | 123.4  | 63.2                     | 10.4      | 78.3                     | 5.5       | 87.1                    | 12.9      | 92.9                     | 22.4      | 92.4                     | 13.0      | 96.8                    | 16.8      |
| 140 | Fluorochloridone   | 0.002 | 0.005 | 0.9999         | 42.0   | 92.3                     | 6.9       | 103.8                    | 5.8       | 101.0                   | 1.4       | 98.3                     | 15.5      | 100.0                    | 18.6      | 100.6                   | 14.5      |
| 141 | Fluquinconazole    | 0.001 | 0.003 | 0.9997         | 29.5   | 71.3                     | 9.3       | 85.6                     | 5.2       | 91.0                    | 8.6       | 94.6                     | 21.8      | 95.5                     | 19.2      | 98.8                    | 20.0      |

| No. | Analyte            | LOD   | LOQ   | R <sup>2</sup> | ME.(%) | Repeatability (n=5)      |           |                          |           |                         |           | Reproducibility (n=11)   |           |                          |           |                         |           |
|-----|--------------------|-------|-------|----------------|--------|--------------------------|-----------|--------------------------|-----------|-------------------------|-----------|--------------------------|-----------|--------------------------|-----------|-------------------------|-----------|
|     |                    |       |       |                |        | 0.01 mg kg <sup>-1</sup> |           | 0.02 mg kg <sup>-1</sup> |           | 0.1 mg kg <sup>-1</sup> |           | 0.01 mg kg <sup>-1</sup> |           | 0.02 mg kg <sup>-1</sup> |           | 0.1 mg kg <sup>-1</sup> |           |
|     |                    |       |       |                |        | Rec.<br>(%)              | CV<br>(%) | Rec.<br>(%)              | CV<br>(%) | Rec.<br>(%)             | CV<br>(%) | Rec.<br>(%)              | CV<br>(%) | Rec.<br>(%)              | CV<br>(%) | Rec.<br>(%)             | CV<br>(%) |
| 142 | Flusilazole        | 0.002 | 0.005 | 1.0000         | 76.5   | 69.8                     | 10.4      | 83.2                     | 4.3       | 88.8                    | 10.8      | 92.2                     | 16.7      | 92.9                     | 11.5      | 96.0                    | 13.7      |
| 143 | Flutianil          | 0.001 | 0.003 | 0.9995         | 182.0  | 79.1                     | 6.9       | 89.7                     | 2.9       | 90.7                    | 9.5       | 97.0                     | 19.1      | 95.2                     | 23.0      | 94.2                    | 17.7      |
| 144 | Fluvalinate-1      | 0.001 | 0.003 | 0.9998         | 96.1   | 97.0                     | 7.9       | 113.0                    | 6.2       | 106.8                   | 6.3       | 91.2                     | 60.1      | 92.8                     | 57.1      | 107.2                   | 60.5      |
|     | Fluvalinate-2      | 0.001 | 0.003 | 0.9999         | 79.7   | 95.0                     | 5.4       | 109.6                    | 6.2       | 106.2                   | 6.5       | 90.7                     | 59.7      | 92.1                     | 55.8      | 107.3                   | 59.9      |
| 145 | Fluxapyroxad       | 0.001 | 0.004 | 0.9996         | 338.9  | 71.0                     | 9.1       | 83.2                     | 4.5       | 89.6                    | 10.5      | 94.6                     | 20.1      | 92.5                     | 18.6      | 93.0                    | 8.7       |
| 146 | Fonofos            | 0.001 | 0.003 | 0.9996         | 65.7   | 63.9                     | 11.9      | 77.2                     | 4.4       | 84.5                    | 15.5      | 82.3                     | 17.5      | 84.3                     | 15.0      | 84.5                    | 16.2      |
| 147 | Formothion         | 0.003 | 0.008 | 0.9996         | 41.7   | 91.2                     | 6.7       | 100.4                    | 9.6       | 97.6                    | 7.6       | 93.2                     | 9.2       | 87.6                     | 24.0      | 93.3                    | 14.3      |
| 148 | Fthalide           | 0.001 | 0.003 | 0.9997         | 31.8   | 68.2                     | 8.4       | 82.7                     | 5.3       | 90.1                    | 10.3      | 87.7                     | 17.3      | 89.6                     | 14.0      | 92.1                    | 11.1      |
| 149 | Halfenprox         | 0.001 | 0.002 | 0.9990         | 164.5  | 70.4                     | 6.7       | 75.2                     | 4.5       | 84.3                    | 17.5      | 71.7                     | 44.2      | 73.9                     | 38.0      | 87.7                    | 49.1      |
| 150 | Heptachlor         | 0.001 | 0.002 | 0.9998         | 56.4   | 79.7                     | 14.5      | 72.2                     | 9.3       | 72.9                    | 3.3       | 84.8                     | 19.6      | 82.2                     | 7.8       | 83.6                    | 12.3      |
|     | Heptachlor epoxide | 0.001 | 0.002 | 0.9998         | 31.9   | 89.1                     | 10.6      | 80.8                     | 9.8       | 81.9                    | 19.8      | 78.9                     | 20.8      | 82.3                     | 10.9      | 84.9                    | 13.0      |
| 151 | Heptenophos        | 0.001 | 0.004 | 0.9993         | 162.6  | 77.9                     | 9.2       | 98.0                     | 7.0       | 95.3                    | 3.6       | 91.2                     | 10.8      | 94.3                     | 19.7      | 95.6                    | 15.1      |
| 152 | Hexythiazox        | 0.001 | 0.004 | 0.9994         | 174.8  | 60.5                     | 9.7       | 70.5                     | 3.7       | 100.5                   | 2.6       | 85.2                     | 19.6      | 87.7                     | 12.3      | 88.3                    | 19.3      |
| 153 | Indanofan          | 0.001 | 0.004 | 0.9996         | 162.3  | 67.5                     | 12.4      | 85.3                     | 4.7       | 91.5                    | 6.5       | 97.4                     | 20.0      | 92.7                     | 11.3      | 96.3                    | 14.1      |
| 154 | Indoxacarb         | 0.001 | 0.003 | 0.9997         | 231.8  | 83.6                     | 9.9       | 105.5                    | 5.8       | 112.0                   | 7.5       | 36.3                     | 19.3      | 48.4                     | 18.6      | 55.3                    | 4.8       |
| 155 | Ipconazole         | 0.001 | 0.004 | 0.9979         | 220.2  | 66.5                     | 9.6       | 79.6                     | 4.9       | 87.7                    | 12.6      | 92.1                     | 25.4      | 93.8                     | 25.1      | 87.9                    | 11.0      |
| 156 | Iprobenfos         | 0.001 | 0.004 | 0.9998         | 181.5  | 75.9                     | 7.0       | 87.5                     | 4.3       | 90.7                    | 9.0       | 94.5                     | 13.8      | 94.6                     | 13.3      | 97.6                    | 16.0      |
| 157 | Iprodione          | 0.002 | 0.007 | 0.9997         | 178.8  | 84.8                     | 7.9       | 102.4                    | 9.9       | 101.0                   | 1.9       | 112.9                    | 23.0      | 107.4                    | 27.7      | 113.3                   | 27.8      |
| 158 | Isazofos           | 0.001 | 0.003 | 0.9986         | 35.4   | 70.5                     | 9.1       | 83.4                     | 4.7       | 88.7                    | 10.7      | 88.5                     | 14.8      | 91.7                     | 9.1       | 92.0                    | 13.4      |
| 159 | Isofenphos         | 0.001 | 0.003 | 0.9993         | 52.1   | 90.8                     | 11.4      | 72.4                     | 12.2      | 88.9                    | 7.3       | 84.6                     | 24.6      | 84.6                     | 18.5      | 89.9                    | 19.4      |
| 160 | Isofenphos-methyl  | 0.001 | 0.004 | 0.9992         | 53.1   | 91.8                     | 5.0       | 79.1                     | 8.6       | 90.4                    | 6.8       | 85.3                     | 23.2      | 85.8                     | 17.9      | 90.9                    | 17.7      |
| 161 | Isoproc carb       | 0.002 | 0.005 | 0.9993         | 135.7  | 82.2                     | 7.9       | 98.8                     | 7.4       | 95.9                    | 3.6       | 95.5                     | 10.7      | 100.6                    | 11.7      | 99.4                    | 12.8      |
| 162 | Isopropalin        | 0.001 | 0.003 | 0.9995         | 58.3   | 61.3                     | 6.6       | 107.5                    | 2.8       | 101.4                   | 6.2       | 87.1                     | 18.9      | 81.7                     | 10.1      | 92.5                    | 18.4      |

| No. | Analyte                 | LOD   | LOQ   | R <sup>2</sup> | ME.(%) | Repeatability (n=5)      |           |                          |           |                         |           | Reproducibility (n=11)   |           |                          |           |                         |           |
|-----|-------------------------|-------|-------|----------------|--------|--------------------------|-----------|--------------------------|-----------|-------------------------|-----------|--------------------------|-----------|--------------------------|-----------|-------------------------|-----------|
|     |                         |       |       |                |        | 0.01 mg kg <sup>-1</sup> |           | 0.02 mg kg <sup>-1</sup> |           | 0.1 mg kg <sup>-1</sup> |           | 0.01 mg kg <sup>-1</sup> |           | 0.02 mg kg <sup>-1</sup> |           | 0.1 mg kg <sup>-1</sup> |           |
|     |                         |       |       |                |        | Rec.<br>(%)              | CV<br>(%) | Rec.<br>(%)              | CV<br>(%) | Rec.<br>(%)             | CV<br>(%) | Rec.<br>(%)              | CV<br>(%) | Rec.<br>(%)              | CV<br>(%) | Rec.<br>(%)             | CV<br>(%) |
| 163 | Isoprothiolane          | 0.001 | 0.003 | 0.9996         | 73.4   | 67.9                     | 10.3      | 82.2                     | 4.3       | 88.4                    | 11.4      | 91.9                     | 16.9      | 89.8                     | 15.3      | 93.0                    | 14.8      |
| 164 | Isopyrazam              | 0.001 | 0.003 | 0.9963         | 250.7  | 77.4                     | 8.5       | 85.4                     | 4.0       | 89.3                    | 11.3      | 96.5                     | 18.9      | 105.0                    | 12.6      | 93.7                    | 12.7      |
| 165 | Isotianil               | 0.001 | 0.004 | 0.9997         | 344.1  | 88.2                     | 5.8       | 101.6                    | 5.2       | 98.3                    | 2.7       | 102.7                    | 13.2      | 105.9                    | 10.0      | 105.5                   | 15.3      |
| 166 | Isoxadifen-ethyl        | 0.001 | 0.003 | 0.9999         | 78.2   | 75.8                     | 7.8       | 89.1                     | 4.1       | 91.2                    | 8.0       | 87.3                     | 16.5      | 88.9                     | 16.6      | 93.8                    | 12.9      |
| 167 | Kresoxim-methyl         | 0.001 | 0.003 | 0.9997         | 47.0   | 68.6                     | 11.1      | 85.9                     | 4.3       | 89.4                    | 9.6       | 88.9                     | 18.1      | 90.8                     | 18.4      | 94.9                    | 15.8      |
| 168 | Leptophos               | 0.001 | 0.003 | 0.9994         | 61.0   | 107.1                    | 9.7       | 90.0                     | 2.1       | 93.7                    | 4.7       | 82.2                     | 23.1      | 82.4                     | 12.6      | 85.2                    | 15.6      |
| 169 | Mefenpyr-diethyl        | 0.001 | 0.004 | 0.9995         | 110.8  | 72.3                     | 9.3       | 84.1                     | 4.7       | 88.8                    | 11.1      | 91.2                     | 19.8      | 91.3                     | 20.0      | 96.5                    | 21.3      |
| 170 | Mepanipyrin             | 0.001 | 0.004 | 0.9992         | 131.7  | 61.8                     | 11.0      | 78.3                     | 4.7       | 85.3                    | 15.1      | 87.1                     | 21.5      | 88.2                     | 14.1      | 89.9                    | 16.5      |
| 171 | Mepronil                | 0.001 | 0.004 | 0.9996         | 207.7  | 65.5                     | 10.3      | 81.3                     | 5.5       | 88.2                    | 11.1      | 90.2                     | 23.5      | 90.8                     | 19.5      | 97.4                    | 16.8      |
| 172 | Metalaxyl               | 0.002 | 0.005 | 0.9970         | 43.8   | 64.5                     | 8.5       | 77.7                     | 5.4       | 88.6                    | 11.2      | 87.0                     | 19.5      | 89.3                     | 11.7      | 94.0                    | 8.4       |
| 173 | Methidathion            | 0.002 | 0.005 | 0.9996         | 115.0  | 93.7                     | 6.5       | 104.1                    | 6.0       | 100.5                   | 1.8       | 105.4                    | 7.9       | 100.6                    | 13.0      | 101.2                   | 13.8      |
| 174 | Methoprotryn            | 0.001 | 0.004 | 0.9999         | 102.4  | 61.1                     | 11.7      | 78.6                     | 5.4       | 87.7                    | 11.6      | 92.0                     | 23.0      | 97.1                     | 8.8       | 98.7                    | 10.8      |
| 175 | Methoxychlor            | 0.001 | 0.002 | 0.9989         | 64.7   | 78.6                     | 18.5      | 94.0                     | 10.6      | 100.3                   | 8.2       | 83.6                     | 9.3       | 84.6                     | 21.0      | 85.8                    | 19.1      |
| 176 | Methyl trithion         | 0.001 | 0.003 | 0.9997         | 96.4   | 80.1                     | 8.5       | 93.8                     | 4.3       | 93.6                    | 5.6       | 87.0                     | 9.5       | 94.2                     | 9.5       | 93.2                    | 20.0      |
| 177 | Metolachlor             | 0.001 | 0.003 | 0.9950         | 55.1   | 62.9                     | 10.2      | 78.4                     | 5.0       | 86.6                    | 13.0      | 86.6                     | 19.6      | 86.9                     | 16.3      | 90.5                    | 13.1      |
| 178 | Metribuzin              | 0.001 | 0.004 | 0.9996         | 71.0   | 70.3                     | 7.3       | 82.4                     | 4.3       | 90.3                    | 9.9       | 96.1                     | 16.3      | 94.9                     | 4.4       | 98.1                    | 9.7       |
| 179 | MGK-264                 | 0.001 | 0.003 | 0.9983         | 43.9   | 61.1                     | 9.6       | 73.2                     | 4.5       | 83.4                    | 18.0      | 84.2                     | 18.4      | 87.0                     | 12.0      | 88.1                    | 14.7      |
| 180 | Molinate                | 0.001 | 0.002 | 0.9996         | 52.2   | 60.6                     | 13.9      | 75.6                     | 5.0       | 83.0                    | 17.2      | 92.9                     | 37.0      | 84.5                     | 14.7      | 85.4                    | 11.6      |
| 181 | Monolinuron             | 0.003 | 0.008 | 0.9997         | 146.8  | 83.5                     | 9.3       | 96.9                     | 5.9       | 95.4                    | 5.5       | 100.6                    | 6.7       | 99.7                     | 9.7       | 99.8                    | 8.8       |
| 182 | Myclobutanil            | 0.001 | 0.004 | 0.9999         | 76.7   | 68.9                     | 9.4       | 84.1                     | 4.3       | 89.5                    | 9.9       | 90.6                     | 18.5      | 93.9                     | 12.1      | 97.1                    | 12.5      |
| 183 | Nitrothal-isopropyl     | 0.001 | 0.002 | 0.9997         | 94.8   | 91.1                     | 4.9       | 96.6                     | 3.4       | 95.9                    | 5.5       | 93.4                     | 16.1      | 95.8                     | 12.3      | 92.4                    | 17.6      |
| 184 | Nonachlor- <i>cis</i>   | 0.001 | 0.003 | 0.9998         | 10.1   | 107.7                    | 9.1       | 127.6                    | 3.8       | 156.0                   | 24.9      | 73.8                     | 24.3      | 70.4                     | 32.9      | 73.1                    | 31.7      |
|     | Nonachlor- <i>trans</i> | 0.001 | 0.002 | 0.9980         | 31.2   | 105.5                    | 6.5       | 125.9                    | 3.5       | 151.9                   | 28.7      | 63.9                     | 42.0      | 69.1                     | 32.8      | 69.9                    | 33.7      |

| No. | Analyte                 | LOD   | LOQ   | R <sup>2</sup> | ME.(%) | Repeatability (n=5)      |           |                          |           |                         |           | Reproducibility (n=11)   |           |                          |           |                         |           |
|-----|-------------------------|-------|-------|----------------|--------|--------------------------|-----------|--------------------------|-----------|-------------------------|-----------|--------------------------|-----------|--------------------------|-----------|-------------------------|-----------|
|     |                         |       |       |                |        | 0.01 mg kg <sup>-1</sup> |           | 0.02 mg kg <sup>-1</sup> |           | 0.1 mg kg <sup>-1</sup> |           | 0.01 mg kg <sup>-1</sup> |           | 0.02 mg kg <sup>-1</sup> |           | 0.1 mg kg <sup>-1</sup> |           |
|     |                         |       |       |                |        | Rec.<br>(%)              | CV<br>(%) | Rec.<br>(%)              | CV<br>(%) | Rec.<br>(%)             | CV<br>(%) | Rec.<br>(%)              | CV<br>(%) | Rec.<br>(%)              | CV<br>(%) | Rec.<br>(%)             | CV<br>(%) |
| 185 | Nuarimol                | 0.001 | 0.004 | 0.9999         | 158.6  | 64.7                     | 8.8       | 80.0                     | 4.6       | 87.1                    | 12.7      | 91.4                     | 21.1      | 93.8                     | 9.9       | 95.2                    | 16.7      |
| 186 | Ortho-phenyl phenol     | 0.001 | 0.004 | 0.9989         | 237.8  | 64.6                     | 22.3      | 74.7                     | 6.5       | 86.6                    | 12.8      | 90.5                     | 32.7      | 89.0                     | 16.0      | 88.8                    | 10.6      |
| 187 | Oxadiazon               | 0.001 | 0.003 | 0.9989         | 57.6   | 67.2                     | 10.4      | 82.1                     | 2.8       | 86.9                    | 13.3      | 83.8                     | 21.0      | 93.7                     | 7.1       | 87.9                    | 18.3      |
| 188 | Oxadixyl                | 0.001 | 0.004 | 0.9998         | 54.6   | 74.4                     | 7.4       | 93.0                     | 4.8       | 96.6                    | 2.8       | 96.4                     | 13.5      | 99.0                     | 9.4       | 103.0                   | 10.6      |
| 189 | Oxyfluorfen             | 0.001 | 0.003 | 0.9997         | 142.1  | 92.0                     | 7.8       | 99.6                     | 1.9       | 95.7                    | 4.2       | 92.4                     | 19.8      | 93.9                     | 20.4      | 94.4                    | 19.4      |
| 190 | Paclobutrazol           | 0.002 | 0.005 | 0.9989         | 218.8  | 60.5                     | 9.0       | 76.6                     | 5.4       | 86.9                    | 12.6      | 88.8                     | 24.3      | 91.2                     | 15.6      | 95.9                    | 20.1      |
| 191 | Parathion               | 0.001 | 0.003 | 0.9996         | 105.1  | 84.8                     | 6.8       | 92.8                     | 3.9       | 93.0                    | 7.5       | 94.5                     | 7.0       | 92.7                     | 13.6      | 92.7                    | 12.7      |
| 192 | Parathion-methyl        | 0.001 | 0.002 | 0.9999         | 77.7   | 90.3                     | 8.7       | 102.4                    | 3.4       | 98.6                    | 2.3       | 99.6                     | 0.9       | 96.7                     | 16.2      | 103.6                   | 13.7      |
| 193 | Penconazole             | 0.002 | 0.005 | 0.9998         | 53.5   | 61.7                     | 16.3      | 73.3                     | 5.0       | 84.7                    | 15.9      | 84.2                     | 22.9      | 85.5                     | 17.5      | 90.0                    | 16.0      |
| 194 | Pendimethalin           | 0.001 | 0.003 | 0.9995         | 86.5   | 72.5                     | 7.0       | 75.8                     | 3.3       | 84.2                    | 18.4      | 81.9                     | 18.7      | 84.7                     | 7.1       | 96.2                    | 17.2      |
| 195 | Penflufen               | 0.001 | 0.004 | 0.9996         | 147.3  | 65.0                     | 10.6      | 81.6                     | 4.9       | 88.6                    | 10.9      | 90.6                     | 22.7      | 91.4                     | 17.6      | 95.4                    | 17.1      |
| 196 | Pentachlorobenzonitrile | 0.001 | 0.002 | 0.9998         | 66.4   | 63.0                     | 9.8       | 75.6                     | 4.6       | 82.8                    | 18.4      | 74.1                     | 22.3      | 84.6                     | 5.5       | 84.3                    | 7.0       |
| 197 | Penthiopyrad            | 0.001 | 0.003 | 0.9985         | 187.2  | 69.1                     | 8.9       | 83.8                     | 4.6       | 88.8                    | 10.4      | 92.5                     | 20.3      | 93.4                     | 15.2      | 98.1                    | 18.2      |
| 198 | Pentoxazone             | 0.001 | 0.003 | 0.9996         | 96.4   | 71.7                     | 8.4       | 85.6                     | 3.4       | 89.1                    | 10.6      | 87.2                     | 25.9      | 99.9                     | 7.8       | 92.0                    | 22.6      |
| 199 | Permethrin-cis          | 0.002 | 0.005 | 0.9995         | 170.6  | 81.9                     | 16.5      | 76.1                     | 8.4       | 93.7                    | 10.9      | 71.3                     | 43.7      | 80.2                     | 36.6      | 79.3                    | 42.9      |
|     | Permethrin-trans        | 0.001 | 0.003 | 0.9992         | 160.6  | 61.5                     | 4.1       | 70.2                     | 6.3       | 90.6                    | 16.8      | 80.4                     | 28.9      | 80.6                     | 31.5      | 83.5                    | 37.7      |
| 200 | Perthane                | 0.001 | 0.003 | 0.9999         | 47.6   | 60.5                     | 8.5       | 73.7                     | 2.9       | 83.4                    | 17.1      | 87.8                     | 20.3      | 87.6                     | 9.1       | 91.0                    | 11.9      |
| 201 | Phenthoate              | 0.001 | 0.003 | 0.9996         | 61.1   | 78.3                     | 8.2       | 88.3                     | 3.2       | 90.4                    | 9.8       | 88.2                     | 13.8      | 90.3                     | 14.3      | 96.9                    | 20.6      |
| 202 | Phosphamidon (E)        | 0.001 | 0.004 | 0.9954         | >500   | 100.9                    | 9.5       | 118.3                    | 12.3      | 101.5                   | 2.7       | 98.5                     | 23.3      | 94.2                     | 21.7      | 110.9                   | 6.6       |
|     | Phosphamidon (Z)        | 0.002 | 0.006 | 0.9998         | 219.6  | 94.1                     | 7.1       | 108.2                    | 6.3       | 102.8                   | 2.5       | 94.4                     | 25.1      | 98.2                     | 25.6      | 112.7                   | 7.4       |
| 203 | Phosalone               | 0.002 | 0.007 | 0.9990         | 132.4  | 94.3                     | 9.3       | 110.4                    | 5.4       | 104.0                   | 5.2       | 94.7                     | 17.1      | 96.1                     | 23.4      | 104.3                   | 21.9      |
| 204 | Phosmet                 | 0.002 | 0.007 | 0.9993         | 41.1   | 87.8                     | 5.6       | 112.0                    | 7.1       | 108.7                   | 6.7       | 100.6                    | 4.7       | 100.4                    | 17.2      | 91.6                    | 20.7      |
| 205 | Picoxystrobin           | 0.001 | 0.004 | 0.9981         | 119.4  | 68.7                     | 9.2       | 85.7                     | 3.3       | 88.0                    | 11.3      | 89.1                     | 19.0      | 90.4                     | 18.3      | 93.4                    | 14.8      |

| No. | Analyte               | LOD   | LOQ   | R <sup>2</sup> | ME.(%) | Repeatability (n=5)      |           |                          |           |                         |           | Reproducibility (n=11)   |           |                          |           |                         |           |
|-----|-----------------------|-------|-------|----------------|--------|--------------------------|-----------|--------------------------|-----------|-------------------------|-----------|--------------------------|-----------|--------------------------|-----------|-------------------------|-----------|
|     |                       |       |       |                |        | 0.01 mg kg <sup>-1</sup> |           | 0.02 mg kg <sup>-1</sup> |           | 0.1 mg kg <sup>-1</sup> |           | 0.01 mg kg <sup>-1</sup> |           | 0.02 mg kg <sup>-1</sup> |           | 0.1 mg kg <sup>-1</sup> |           |
|     |                       |       |       |                |        | Rec.<br>(%)              | CV<br>(%) | Rec.<br>(%)              | CV<br>(%) | Rec.<br>(%)             | CV<br>(%) | Rec.<br>(%)              | CV<br>(%) | Rec.<br>(%)              | CV<br>(%) | Rec.<br>(%)             | CV<br>(%) |
| 206 | Piperonyl butoxide    | 0.001 | 0.004 | 0.9992         | 194.7  | 71.2                     | 10.0      | 81.9                     | 4.4       | 87.8                    | 12.5      | 89.8                     | 21.0      | 89.8                     | 20.0      | 94.2                    | 22.0      |
| 207 | Pirimicarb            | 0.001 | 0.003 | 0.9958         | 59.4   | 64.2                     | 8.8       | 78.6                     | 4.3       | 88.0                    | 11.5      | 87.2                     | 17.5      | 89.8                     | 9.7       | 92.3                    | 9.3       |
| 208 | Pirimiphos-ethyl      | 0.001 | 0.003 | 0.9983         | 52.1   | 110.3                    | 8.8       | 70.5                     | 9.6       | 81.3                    | 7.3       | 76.9                     | 26.0      | 86.9                     | 12.0      | 91.1                    | 13.9      |
| 209 | Pirimiphos-methyl     | 0.001 | 0.003 | 0.9957         | 58.4   | 68.4                     | 9.0       | 76.9                     | 3.7       | 85.0                    | 16.0      | 87.2                     | 14.4      | 89.8                     | 8.2       | 85.8                    | 18.0      |
| 210 | Pretilachlor          | 0.001 | 0.004 | 0.9990         | 91.7   | 76.5                     | 8.9       | 90.8                     | 4.1       | 91.0                    | 8.0       | 98.0                     | 11.6      | 99.2                     | 4.9       | 97.9                    | 7.6       |
| 211 | Prochloraz            | 0.001 | 0.004 | 0.9985         | 387.8  | 65.4                     | 14.4      | 84.2                     | 3.5       | 93.3                    | 5.8       | 90.1                     | 17.0      | 96.9                     | 11.0      | 112.3                   | 25.1      |
|     | 2,4,6-trichlorophenol | 0.002 | 0.007 | 0.9952         | 127.6  | 60.7                     | 9.9       | 73.3                     | 4.5       | 81.5                    | 20.3      | 61.3                     | 9.2       | 69.0                     | 20.6      | 64.0                    | 31.2      |
| 212 | Procymidone           | 0.001 | 0.003 | 0.9993         | 35.9   | 62.4                     | 11.0      | 76.8                     | 4.7       | 86.1                    | 14.7      | 82.4                     | 22.6      | 87.7                     | 14.2      | 90.4                    | 13.4      |
| 213 | Prodiamine            | 0.001 | 0.002 | 0.9997         | 77.7   | 76.4                     | 6.8       | 82.9                     | 3.4       | 87.4                    | 13.6      | 94.5                     | 8.8       | 92.2                     | 4.6       | 100.5                   | 14.1      |
| 214 | Profenofos            | 0.002 | 0.005 | 0.9997         | 267.5  | 75.0                     | 8.5       | 96.2                     | 5.4       | 97.1                    | 2.1       | 91.3                     | 17.0      | 94.6                     | 20.4      | 98.4                    | 21.3      |
| 215 | Profluralin           | 0.001 | 0.002 | 0.9948         | 54.5   | 81.6                     | 6.8       | 85.6                     | 3.7       | 87.6                    | 13.7      | 90.9                     | 7.0       | 87.5                     | 14.4      | 89.4                    | 19.6      |
| 216 | Prohydrojasmon        | 0.001 | 0.002 | 0.9949         | 70.6   | 64.6                     | 12.5      | 76.1                     | 4.4       | 85.5                    | 16.1      | 90.0                     | 17.5      | 88.8                     | 9.8       | 88.3                    | 12.9      |
| 217 | Prometon              | 0.001 | 0.004 | 0.9997         | 110.0  | 61.4                     | 9.8       | 76.6                     | 4.6       | 86.4                    | 13.5      | 87.6                     | 19.8      | 93.1                     | 7.5       | 93.9                    | 6.8       |
| 218 | Prometryn             | 0.001 | 0.003 | 0.9995         | 51.4   | 113.5                    | 10.4      | 75.7                     | 9.0       | 86.8                    | 10.1      | 80.6                     | 24.6      | 82.0                     | 17.4      | 86.2                    | 15.6      |
| 219 | Propachlor            | 0.001 | 0.004 | 0.9994         | 95.9   | 75.8                     | 8.3       | 93.2                     | 5.7       | 92.7                    | 5.7       | 94.7                     | 9.7       | 95.9                     | 10.1      | 95.0                    | 10.1      |
| 220 | Propanil              | 0.001 | 0.004 | 0.9998         | 95.6   | 68.4                     | 7.3       | 78.2                     | 4.8       | 87.0                    | 14.0      | 94.6                     | 17.3      | 96.2                     | 8.7       | 96.5                    | 9.7       |
| 221 | Propazine             | 0.001 | 0.003 | 0.9997         | 81.6   | 63.3                     | 10.5      | 78.7                     | 5.0       | 86.7                    | 13.2      | 84.5                     | 17.9      | 85.9                     | 13.8      | 89.7                    | 9.3       |
| 222 | Propetamphos          | 0.001 | 0.003 | 0.9994         | 97.8   | 71.2                     | 10.1      | 83.3                     | 3.8       | 88.4                    | 11.4      | 88.1                     | 15.0      | 89.4                     | 15.5      | 92.6                    | 12.9      |
| 223 | Propham               | 0.001 | 0.003 | 0.9992         | 142.5  | 64.0                     | 12.1      | 82.9                     | 5.0       | 87.2                    | 11.4      | 88.5                     | 17.5      | 92.8                     | 7.7       | 91.5                    | 5.8       |
| 224 | Propiconazole-1       | 0.002 | 0.005 | 0.9999         | 95.6   | 64.3                     | 9.1       | 79.4                     | 5.4       | 87.2                    | 12.9      | 81.5                     | 23.0      | 88.8                     | 18.9      | 94.5                    | 16.5      |
|     | Propiconazole-2       | 0.002 | 0.006 | 1.0000         | 104.4  | 66.8                     | 9.7       | 81.2                     | 4.1       | 87.5                    | 12.1      | 88.0                     | 16.5      | 91.1                     | 15.7      | 94.2                    | 17.1      |
| 225 | Propisochlor          | 0.001 | 0.003 | 0.9952         | 42.0   | 72.1                     | 9.6       | 83.1                     | 4.9       | 88.3                    | 11.7      | 88.0                     | 15.7      | 87.6                     | 16.9      | 90.8                    | 14.5      |
| 226 | Propyzamide           | 0.001 | 0.003 | 0.9998         | 89.4   | 66.1                     | 9.4       | 79.3                     | 5.2       | 86.7                    | 13.1      | 92.5                     | 18.0      | 90.7                     | 7.7       | 91.5                    | 12.7      |

| No. | Analyte                | LOD   | LOQ   | R <sup>2</sup> | ME.(%) | Repeatability (n=5)      |           |                          |           |                         |           | Reproducibility (n=11)   |           |                          |           |                         |           |
|-----|------------------------|-------|-------|----------------|--------|--------------------------|-----------|--------------------------|-----------|-------------------------|-----------|--------------------------|-----------|--------------------------|-----------|-------------------------|-----------|
|     |                        |       |       |                |        | 0.01 mg kg <sup>-1</sup> |           | 0.02 mg kg <sup>-1</sup> |           | 0.1 mg kg <sup>-1</sup> |           | 0.01 mg kg <sup>-1</sup> |           | 0.02 mg kg <sup>-1</sup> |           | 0.1 mg kg <sup>-1</sup> |           |
|     |                        |       |       |                |        | Rec.<br>(%)              | CV<br>(%) | Rec.<br>(%)              | CV<br>(%) | Rec.<br>(%)             | CV<br>(%) | Rec.<br>(%)              | CV<br>(%) | Rec.<br>(%)              | CV<br>(%) | Rec.<br>(%)             | CV<br>(%) |
| 227 | Prothiofos             | 0.001 | 0.003 | 0.9981         | 93.0   | 105.8                    | 8.6       | 98.6                     | 3.9       | 101.3                   | 4.7       | 84.3                     | 24.7      | 82.3                     | 13.0      | 85.2                    | 15.3      |
| 228 | Pyracarbolid           | 0.002 | 0.005 | 0.9997         | 113.2  | 113.3                    | 10.0      | 76.4                     | 7.6       | 89.5                    | 7.8       | 87.5                     | 26.8      | 92.4                     | 13.0      | 97.5                    | 12.3      |
| 229 | Pyraclofos             | 0.001 | 0.003 | 0.9989         | 496.7  | 96.5                     | 9.8       | 124.4                    | 0.7       | 131.5                   | 4.3       | 56.6                     | 9.8       | 62.5                     | 18.4      | 64.6                    | 11.3      |
| 230 | Pyraflufen-ethyl       | 0.001 | 0.004 | 1.0000         | 126.2  | 71.6                     | 7.8       | 86.0                     | 3.9       | 90.2                    | 9.3       | 92.8                     | 18.5      | 91.2                     | 19.8      | 97.5                    | 17.0      |
| 231 | Pyrazophos             | 0.001 | 0.004 | 0.9980         | 112.0  | 82.9                     | 8.6       | 97.2                     | 4.8       | 96.3                    | 3.0       | 96.0                     | 11.6      | 96.2                     | 17.2      | 101.2                   | 17.2      |
| 232 | Pyridalyl              | 0.001 | 0.003 | 0.9997         | 226.1  | 105.8                    | 7.7       | 119.6                    | 5.8       | 113.3                   | 15.7      | 65.0                     | 54.9      | 69.3                     | 44.9      | 75.8                    | 52.0      |
| 233 | Pyrifenox              | 0.001 | 0.004 | 0.9999         | 68.9   | 60.8                     | 11.9      | 74.1                     | 5.5       | 84.7                    | 15.7      | 83.2                     | 28.8      | 91.0                     | 12.8      | 94.9                    | 15.6      |
| 234 | Pyriftalid             | 0.001 | 0.004 | 0.9992         | 164.2  | 77.2                     | 8.2       | 89.3                     | 5.2       | 92.6                    | 7.9       | 96.8                     | 16.2      | 98.3                     | 13.5      | 98.5                    | 13.4      |
| 235 | Pyrimethanil           | 0.001 | 0.003 | 0.9956         | 65.0   | 119.6                    | 10.8      | 79.0                     | 9.4       | 90.1                    | 8.4       | 81.0                     | 20.6      | 83.3                     | 15.3      | 85.5                    | 12.1      |
| 236 | Pyriminobac-methyl (E) | 0.001 | 0.003 | 0.9995         | 109.4  | 68.5                     | 9.1       | 83.9                     | 5.4       | 89.8                    | 9.7       | 91.3                     | 17.9      | 91.9                     | 14.1      | 90.6                    | 5.9       |
|     | Pyriminobac-methyl (Z) | 0.001 | 0.004 | 0.9998         | 65.5   | 68.4                     | 9.1       | 84.7                     | 5.2       | 90.2                    | 9.2       | 91.7                     | 17.7      | 91.9                     | 13.8      | 97.7                    | 16.0      |
| 237 | Quinalphos             | 0.001 | 0.004 | 0.9998         | 58.4   | 65.2                     | 7.7       | 78.5                     | 5.2       | 86.9                    | 13.3      | 82.7                     | 20.6      | 87.7                     | 14.8      | 90.3                    | 17.3      |
| 238 | Quinoxifen             | 0.001 | 0.003 | 1.0000         | 47.8   | 101.5                    | 11.3      | 94.1                     | 2.9       | 108.1                   | 4.7       | 86.2                     | 25.8      | 85.2                     | 15.9      | 87.2                    | 17.5      |
| 239 | Quintozene             | 0.001 | 0.003 | 0.9991         | 75.5   | 95.6                     | 8.2       | 102.0                    | 4.7       | 93.9                    | 6.6       | 91.6                     | 14.7      | 87.6                     | 25.7      | 82.4                    | 20.2      |
| 240 | Quizalofop-ethyl       | 0.001 | 0.003 | 0.9985         | 216.6  | 77.9                     | 7.9       | 87.2                     | 3.1       | 89.8                    | 11.0      | 77.6                     | 3.0       | 81.8                     | 20.4      | 84.0                    | 12.0      |
| 241 | Silafluofen            | 0.001 | 0.003 | 0.9986         | 144.6  | 111.2                    | 7.6       | 94.7                     | 8.8       | 91.9                    | 4.1       | 88.6                     | 26.2      | 88.0                     | 18.9      | 90.1                    | 19.6      |
| 242 | Simeconazole           | 0.001 | 0.004 | 0.9990         | 104.3  | 66.8                     | 7.8       | 78.9                     | 4.6       | 87.6                    | 12.6      | 91.3                     | 19.1      | 91.6                     | 13.8      | 94.5                    | 15.2      |
| 243 | Simetryn               | 0.001 | 0.004 | 1.0000         | 66.5   | 61.9                     | 8.3       | 74.6                     | 5.0       | 85.7                    | 14.9      | 86.0                     | 20.5      | 89.1                     | 9.8       | 91.3                    | 10.3      |
| 244 | Spiromesifen           | 0.001 | 0.003 | 0.9991         | 93.5   | 70.6                     | 11.8      | 86.0                     | 5.2       | 90.2                    | 7.4       | 87.6                     | 22.6      | 97.2                     | 7.5       | 101.4                   | 7.7       |
| 245 | Spiroxamine-1          | 0.002 | 0.005 | 0.9997         | 95.0   | 88.1                     | 18.8      | 70.4                     | 15.0      | 83.1                    | 7.8       | 103.7                    | 9.4       | 93.0                     | 16.8      | 93.2                    | 12.1      |
|     | Spiroxamine-2          | 0.001 | 0.004 | 0.9990         | 70.6   | 97.9                     | 15.6      | 71.8                     | 15.8      | 76.5                    | 11.0      | 97.2                     | 30.8      | 97.2                     | 16.5      | 95.9                    | 13.8      |
| 246 | Sulfotep               | 0.001 | 0.003 | 0.9993         | 80.7   | 69.1                     | 10.5      | 83.4                     | 4.1       | 87.3                    | 12.5      | 85.4                     | 15.6      | 92.0                     | 7.4       | 90.1                    | 12.2      |
| 247 | Tebuconazole           | 0.002 | 0.005 | 0.9998         | 249.2  | 65.7                     | 9.9       | 79.7                     | 4.7       | 87.4                    | 12.3      | 94.6                     | 21.3      | 95.8                     | 12.1      | 91.8                    | 9.9       |

| No. | Analyte           | LOD   | LOQ   | R <sup>2</sup> | ME.(%) | Repeatability (n=5)      |           |                          |           |                         |           | Reproducibility (n=11)   |           |                          |           |                         |           |
|-----|-------------------|-------|-------|----------------|--------|--------------------------|-----------|--------------------------|-----------|-------------------------|-----------|--------------------------|-----------|--------------------------|-----------|-------------------------|-----------|
|     |                   |       |       |                |        | 0.01 mg kg <sup>-1</sup> |           | 0.02 mg kg <sup>-1</sup> |           | 0.1 mg kg <sup>-1</sup> |           | 0.01 mg kg <sup>-1</sup> |           | 0.02 mg kg <sup>-1</sup> |           | 0.1 mg kg <sup>-1</sup> |           |
|     |                   |       |       |                |        | Rec.<br>(%)              | CV<br>(%) | Rec.<br>(%)              | CV<br>(%) | Rec.<br>(%)             | CV<br>(%) | Rec.<br>(%)              | CV<br>(%) | Rec.<br>(%)              | CV<br>(%) | Rec.<br>(%)             | CV<br>(%) |
| 248 | Tebufenpyrad      | 0.001 | 0.003 | 0.9992         | 108.9  | 64.9                     | 8.6       | 76.9                     | 3.9       | 85.0                    | 15.7      | 92.1                     | 20.5      | 94.8                     | 10.4      | 97.7                    | 14.1      |
| 249 | Tebupirimfos      | 0.001 | 0.003 | 0.9997         | 68.2   | 62.9                     | 9.6       | 74.0                     | 3.5       | 82.9                    | 18.0      | 81.8                     | 17.4      | 87.4                     | 9.7       | 83.9                    | 18.3      |
| 250 | Tecnazene         | 0.001 | 0.003 | 0.9999         | 71.4   | 80.6                     | 9.1       | 92.1                     | 3.8       | 88.3                    | 10.4      | 87.2                     | 8.0       | 91.1                     | 11.9      | 90.1                    | 7.8       |
| 251 | Tefluthrin        | 0.001 | 0.002 | 0.9993         | 50.4   | 63.5                     | 9.5       | 75.6                     | 2.8       | 84.3                    | 15.8      | 88.4                     | 17.5      | 87.0                     | 9.0       | 87.8                    | 9.8       |
| 252 | Terbacil          | 0.002 | 0.005 | 0.9998         | 194.0  | 78.8                     | 6.0       | 93.7                     | 4.3       | 96.8                    | 3.6       | 101.4                    | 11.9      | 101.4                    | 4.3       | 104.3                   | 3.9       |
| 253 | Terbumeton        | 0.001 | 0.003 | 0.9996         | 92.7   | 62.4                     | 9.5       | 76.5                     | 4.8       | 86.1                    | 14.1      | 93.5                     | 22.4      | 86.9                     | 16.5      | 91.1                    | 7.2       |
| 254 | Terbutryn         | 0.001 | 0.003 | 0.9997         | 70.5   | 118.2                    | 11.2      | 77.2                     | 8.7       | 89.4                    | 7.6       | 82.1                     | 24.6      | 84.3                     | 17.8      | 86.4                    | 15.8      |
| 255 | Tetrachlorvinphos | 0.002 | 0.005 | 0.9989         | 208.0  | 85.4                     | 10.0      | 100.1                    | 7.0       | 99.0                    | 4.8       | 98.7                     | 10.6      | 97.7                     | 18.4      | 99.6                    | 19.3      |
| 256 | Tetraconazole     | 0.001 | 0.004 | 0.9995         | 63.6   | 61.4                     | 9.2       | 75.6                     | 4.1       | 87.1                    | 13.0      | 87.3                     | 24.0      | 88.0                     | 16.8      | 93.4                    | 15.7      |
| 257 | Tetradifon        | 0.001 | 0.003 | 1.0000         | 47.7   | 65.6                     | 7.6       | 76.8                     | 3.7       | 84.7                    | 16.3      | 79.6                     | 27.2      | 92.1                     | 9.4       | 94.5                    | 11.8      |
| 258 | Tetramethrin-1    | 0.002 | 0.005 | 0.9999         | 372.2  | 85.7                     | 5.9       | 96.1                     | 2.6       | 93.6                    | 5.8       | 85.8                     | 39.0      | 86.6                     | 41.3      | 97.6                    | 25.2      |
|     | Tetramethrin-2    | 0.002 | 0.006 | 0.9993         | 194.6  | 79.8                     | 15.7      | 77.6                     | 9.2       | 90.8                    | 7.7       | 81.0                     | 11.1      | 87.4                     | 27.6      | 88.3                    | 25.3      |
| 259 | Thifluzamide      | 0.001 | 0.004 | 0.9999         | 238.9  | 69.7                     | 10.3      | 86.8                     | 4.9       | 89.8                    | 9.5       | 93.4                     | 18.4      | 93.8                     | 16.0      | 99.1                    | 19.0      |
| 260 | Thiometon         | 0.001 | 0.003 | 0.9995         | 103.7  | 61.7                     | 10.7      | 74.1                     | 3.4       | 85.2                    | 14.2      | 84.3                     | 20.1      | 86.4                     | 10.9      | 89.7                    | 11.9      |
| 261 | Thionazin         | 0.001 | 0.003 | 0.9995         | 88.0   | 65.7                     | 11.6      | 82.7                     | 5.0       | 87.7                    | 10.3      | 96.2                     | 22.1      | 89.9                     | 10.8      | 91.1                    | 9.7       |
| 262 | Tolclofos-methyl  | 0.001 | 0.003 | 0.9998         | 61.3   | 68.6                     | 7.5       | 80.5                     | 4.0       | 86.1                    | 14.2      | 83.3                     | 15.7      | 90.8                     | 6.7       | 86.0                    | 15.7      |
| 263 | Triadimefon       | 0.001 | 0.004 | 0.9990         | 58.4   | 63.5                     | 8.6       | 76.5                     | 5.4       | 86.6                    | 14.3      | 95.5                     | 22.6      | 92.7                     | 9.8       | 94.0                    | 11.8      |
| 264 | Triadimenol       | 0.002 | 0.005 | 0.9999         | 128.3  | 64.8                     | 9.0       | 78.7                     | 5.2       | 88.2                    | 12.5      | 93.8                     | 21.1      | 101.0                    | 12.0      | 91.3                    | 11.0      |
| 265 | Tri-allate        | 0.001 | 0.003 | 0.9997         | 58.8   | 93.3                     | 14.4      | 78.1                     | 9.9       | 76.2                    | 9.8       | 85.3                     | 21.6      | 82.9                     | 11.4      | 83.2                    | 14.5      |
| 266 | Triazophos        | 0.001 | 0.004 | 0.9995         | 160.1  | 81.1                     | 10.1      | 98.3                     | 5.9       | 96.8                    | 2.0       | 104.2                    | 13.4      | 98.2                     | 12.9      | 103.0                   | 19.9      |
| 267 | Tridiphane        | 0.001 | 0.003 | 0.9990         | 59.5   | 78.2                     | 9.7       | 89.7                     | 6.2       | 83.5                    | 6.0       | 56.7                     | 18.3      | 64.6                     | 22.4      | 66.7                    | 11.6      |
| 268 | Trifloxystrobin   | 0.001 | 0.003 | 0.9997         | 88.1   | 72.7                     | 8.0       | 87.7                     | 3.4       | 89.7                    | 9.4       | 88.6                     | 19.4      | 100.2                    | 3.3       | 95.6                    | 21.3      |
| 269 | Triflumizole      | 0.001 | 0.004 | 0.9999         | 74.9   | 65.1                     | 12.2      | 76.5                     | 3.3       | 85.5                    | 14.9      | 85.3                     | 19.6      | 86.1                     | 19.0      | 91.2                    | 17.8      |

| No. | Analyte     | LOD   | LOQ   | R <sup>2</sup> | ME.(%) | Repeatability (n=5)      |           |                          |           |                         |           | Reproducibility (n=11)   |           |                          |           |                         |           |
|-----|-------------|-------|-------|----------------|--------|--------------------------|-----------|--------------------------|-----------|-------------------------|-----------|--------------------------|-----------|--------------------------|-----------|-------------------------|-----------|
|     |             |       |       |                |        | 0.01 mg kg <sup>-1</sup> |           | 0.02 mg kg <sup>-1</sup> |           | 0.1 mg kg <sup>-1</sup> |           | 0.01 mg kg <sup>-1</sup> |           | 0.02 mg kg <sup>-1</sup> |           | 0.1 mg kg <sup>-1</sup> |           |
|     |             |       |       |                |        | Rec.<br>(%)              | CV<br>(%) | Rec.<br>(%)              | CV<br>(%) | Rec.<br>(%)             | CV<br>(%) | Rec.<br>(%)              | CV<br>(%) | Rec.<br>(%)              | CV<br>(%) | Rec.<br>(%)             | CV<br>(%) |
| 270 | Trifluralin | 0.001 | 0.002 | 0.9993         | 104.7  | 76.5                     | 8.1       | 84.8                     | 2.7       | 86.8                    | 13.5      | 82.9                     | 19.2      | 89.2                     | 9.3       | 94.4                    | 12.6      |
| 271 | Vinclozolin | 0.001 | 0.002 | 0.9996         | 50.8   | 67.6                     | 8.7       | 79.3                     | 5.4       | 87.1                    | 13.7      | 88.2                     | 14.9      | 90.8                     | 6.5       | 88.8                    | 12.6      |
| 272 | Zoxamide    | 0.002 | 0.006 | 0.9995         | 138.9  | 89.1                     | 15.8      | 108.4                    | 7.3       | 104.3                   | 4.1       | 89.1                     | 15.5      | 103.2                    | 14.4      | 99.5                    | 22.4      |

Table S4. Method validation parameter of 272 pesticides in potato.

| No. | Analyte           | LOD   | LOQ   | R <sup>2</sup> | ME.(%) | Repeatability (n=5)      |           |                          |           |                         |           | Reproducibility (n=11)   |           |                          |           |                         |           |
|-----|-------------------|-------|-------|----------------|--------|--------------------------|-----------|--------------------------|-----------|-------------------------|-----------|--------------------------|-----------|--------------------------|-----------|-------------------------|-----------|
|     |                   |       |       |                |        | 0.01 mg kg <sup>-1</sup> |           | 0.02 mg kg <sup>-1</sup> |           | 0.1 mg kg <sup>-1</sup> |           | 0.01 mg kg <sup>-1</sup> |           | 0.02 mg kg <sup>-1</sup> |           | 0.1 mg kg <sup>-1</sup> |           |
|     |                   |       |       |                |        | Rec.<br>(%)              | CV<br>(%) | Rec.<br>(%)              | CV<br>(%) | Rec.<br>(%)             | CV<br>(%) | Rec.<br>(%)              | CV<br>(%) | Rec.<br>(%)              | CV<br>(%) | Rec.<br>(%)             | CV<br>(%) |
| 1   | 2,6-DIPN          | 0.002 | 0.006 | 0.9997         | 47.5   | 129.8                    | 11.8      | 103.1                    | 6.0       | 81.5                    | 4.8       | 138.2                    | 5.0       | 118.0                    | 8.4       | 90.7                    | 0.2       |
| 2   | Acetochlor        | 0.002 | 0.007 | 0.9998         | 31.2   | 78.5                     | 4.6       | 78.8                     | 4.5       | 75.7                    | 1.5       | 98.0                     | 13.2      | 92.6                     | 6.3       | 94.5                    | 10.9      |
|     | EMA               | 0.003 | 0.008 | 0.9931         | 10.6   | 72.3                     | 13.2      | 77.6                     | 21.0      | 88.6                    | 7.5       | 88.1                     | 17.0      | 88.9                     | 4.2       | 92.7                    | 8.4       |
|     | HEMA              | 0.002 | 0.007 | 0.9989         | 373.7  | 68.8                     | 6.5       | 66.0                     | 7.4       | 65.9                    | 2.1       | 116.3                    | 42.2      | 62.5                     | 57.6      | 66.2                    | 39.6      |
| 3   | Acrinathrin       | 0.003 | 0.008 | 0.9999         | 55.7   | 52.4                     | 11.7      | 72.1                     | 28.0      | 51.0                    | 4.3       | 101.2                    | 37.6      | 90.7                     | 28.1      | 99.4                    | 41.2      |
| 4   | Alachlor          | 0.002 | 0.007 | 1.0000         | 27.6   | 79.1                     | 4.8       | 80.2                     | 4.5       | 78.2                    | 1.3       | 95.6                     | 12.7      | 89.4                     | 1.6       | 90.5                    | 13.3      |
| 5   | Aldrin            | 0.002 | 0.007 | 0.9991         | 16.3   | 86.3                     | 1.7       | 88.4                     | 3.8       | 82.8                    | 1.4       | 88.4                     | 8.1       | 87.5                     | 10.8      | 86.8                    | 5.2       |
|     | Dieldrin          | 0.002 | 0.007 | 0.9998         | 11.5   | 89.0                     | 2.2       | 91.3                     | 2.0       | 85.3                    | 0.4       | 95.6                     | 3.3       | 93.3                     | 8.0       | 94.4                    | 1.8       |
| 6   | Allidochlor       | 0.003 | 0.008 | 0.9970         | 28.3   | 75.8                     | 7.3       | 86.0                     | 5.9       | 79.9                    | 5.6       | 95.4                     | 11.7      | 91.0                     | 5.4       | 90.8                    | 5.5       |
| 7   | Ametryn           | 0.002 | 0.007 | 1.0000         | 54.9   | 77.0                     | 3.4       | 78.5                     | 2.6       | 75.8                    | 0.7       | 94.6                     | 12.4      | 87.9                     | 2.4       | 88.7                    | 12.6      |
| 8   | Anilofos          | 0.003 | 0.008 | 0.9999         | 43.2   | 70.3                     | 14.4      | 73.9                     | 15.1      | 72.5                    | 7.4       | 100.0                    | 21.0      | 96.2                     | 13.3      | 102.1                   | 18.6      |
| 9   | Aramite           | 0.002 | 0.007 | 1.0000         | 46.1   | 77.6                     | 7.6       | 78.5                     | 6.9       | 72.2                    | 3.1       | 97.8                     | 17.7      | 90.7                     | 7.7       | 91.9                    | 20.0      |
| 10  | Aspon             | 0.001 | 0.003 | 0.9993         | 55.5   | 80.3                     | 3.9       | 80.8                     | 3.5       | 76.3                    | 1.4       | 96.0                     | 9.8       | 91.1                     | 1.7       | 93.2                    | 9.3       |
| 11  | Atrazine          | 0.002 | 0.006 | 0.9996         | 54.0   | 78.6                     | 6.6       | 81.1                     | 5.7       | 76.3                    | 1.2       | 98.3                     | 10.5      | 91.5                     | 3.3       | 92.2                    | 7.8       |
| 12  | Azaconazole       | 0.001 | 0.004 | 1.0000         | 26.6   | 82.8                     | 4.4       | 85.2                     | 2.8       | 81.7                    | 0.9       | 104.1                    | 10.1      | 98.9                     | 5.7       | 98.9                    | 7.6       |
| 13  | Benfluralin       | 0.002 | 0.007 | 0.9999         | 46.9   | 81.7                     | 3.0       | 82.4                     | 3.3       | 77.3                    | 3.1       | 97.6                     | 15.2      | 88.2                     | 3.3       | 92.3                    | 10.6      |
| 14  | Benfuresate       | 0.003 | 0.008 | 0.9997         | 23.9   | 80.5                     | 2.8       | 82.4                     | 2.5       | 78.9                    | 1.2       | 98.4                     | 10.5      | 92.6                     | 2.2       | 92.5                    | 8.5       |
| 15  | Benodanil         | 0.002 | 0.007 | 0.9999         | 69.4   | 70.4                     | 3.1       | 72.3                     | 4.7       | 70.5                    | 2.3       | 93.3                     | 24.8      | 89.5                     | 12.9      | 89.1                    | 28.6      |
| 16  | Benzoylprop-ethyl | 0.003 | 0.008 | 0.9998         | 34.8   | 78.1                     | 4.2       | 78.1                     | 3.2       | 76.9                    | 0.7       | 101.1                    | 13.7      | 96.1                     | 8.9       | 95.8                    | 13.5      |
| 17  | BHC, $\alpha$ -   | 0.002 | 0.007 | 0.9990         | 12.9   | 86.2                     | 4.5       | 95.8                     | 5.9       | 90.0                    | 3.4       | 99.2                     | 11.1      | 94.9                     | 10.5      | 93.3                    | 10.1      |
|     | BHC, $\beta$ -    | 0.002 | 0.007 | 1.0000         | 15.5   | 100.7                    | 5.6       | 110.1                    | 4.1       | 116.1                   | 5.2       | 105.3                    | 10.4      | 100.7                    | 16.2      | 94.8                    | 5.7       |

| No. | Analyte               | LOD   | LOQ   | R <sup>2</sup> | ME.(%) | Repeatability (n=5)      |           |                          |           |                         |           | Reproducibility (n=11)   |           |                          |           |                         |           |
|-----|-----------------------|-------|-------|----------------|--------|--------------------------|-----------|--------------------------|-----------|-------------------------|-----------|--------------------------|-----------|--------------------------|-----------|-------------------------|-----------|
|     |                       |       |       |                |        | 0.01 mg kg <sup>-1</sup> |           | 0.02 mg kg <sup>-1</sup> |           | 0.1 mg kg <sup>-1</sup> |           | 0.01 mg kg <sup>-1</sup> |           | 0.02 mg kg <sup>-1</sup> |           | 0.1 mg kg <sup>-1</sup> |           |
|     |                       |       |       |                |        | Rec.<br>(%)              | CV<br>(%) | Rec.<br>(%)              | CV<br>(%) | Rec.<br>(%)             | CV<br>(%) | Rec.<br>(%)              | CV<br>(%) | Rec.<br>(%)              | CV<br>(%) | Rec.<br>(%)             | CV<br>(%) |
|     | BHC, $\delta$ -       | 0.002 | 0.007 | 0.9987         | -28.2  | 66.0                     | 7.6       | 77.7                     | 10.5      | 78.5                    | 4.5       | 90.2                     | 21.7      | 88.8                     | 2.5       | 90.0                    | 7.3       |
| 18  | BHC, $\gamma$ -       | 0.002 | 0.007 | 0.9989         | 8.4    | 96.4                     | 8.9       | 106.3                    | 5.9       | 108.0                   | 2.2       | 98.6                     | 7.6       | 104.6                    | 11.4      | 102.2                   | 15.6      |
| 19  | Bifentox              | 0.002 | 0.007 | 0.9992         | 43.0   | 91.6                     | 0.8       | 84.1                     | 6.6       | 77.1                    | 3.1       | 106.3                    | 14.1      | 101.7                    | 8.6       | 104.2                   | 15.5      |
| 20  | Bifenthrin            | 0.003 | 0.008 | 0.9998         | 59.5   | 80.0                     | 4.8       | 78.9                     | 3.6       | 75.1                    | 1.5       | 96.8                     | 9.4       | 92.9                     | 5.5       | 90.8                    | 10.1      |
| 21  | Boscalid              | 0.002 | 0.007 | 1.0000         | 94.7   | 92.6                     | 4.7       | 91.8                     | 1.6       | 83.9                    | 6.8       | 84.9                     | 26.4      | 99.5                     | 24.8      | 90.6                    | 24.9      |
| 22  | Bromobutide           | 0.003 | 0.008 | 0.9998         | 23.0   | 90.3                     | 4.8       | 90.2                     | 2.5       | 87.9                    | 1.5       | 99.5                     | 10.8      | 94.3                     | 6.2       | 97.1                    | 9.3       |
| 23  | Bromophos-methyl      | 0.002 | 0.006 | 0.9999         | 31.9   | 81.2                     | 5.8       | 83.2                     | 4.3       | 80.0                    | 0.8       | 93.0                     | 10.8      | 89.0                     | 10.1      | 88.1                    | 8.7       |
| 24  | Bromophos-ethyl       | 0.002 | 0.007 | 1.0000         | 37.9   | 73.4                     | 7.4       | 74.0                     | 7.1       | 71.5                    | 2.1       | 97.2                     | 6.6       | 92.3                     | 2.7       | 92.1                    | 4.9       |
| 25  | Bromopropylate        | 0.003 | 0.008 | 0.9994         | 98.8   | 72.3                     | 5.5       | 71.4                     | 3.4       | 70.0                    | 1.7       | 101.1                    | 19.2      | 95.5                     | 14.7      | 95.0                    | 19.5      |
| 26  | Bupirimate            | 0.002 | 0.006 | 1.0000         | 47.4   | 80.2                     | 5.3       | 78.9                     | 2.9       | 78.2                    | 0.9       | 101.6                    | 11.8      | 94.7                     | 6.5       | 94.5                    | 11.6      |
| 27  | Buprofezin            | 0.002 | 0.007 | 1.0000         | 28.9   | 81.6                     | 4.1       | 81.5                     | 3.5       | 79.4                    | 0.7       | 95.7                     | 9.7       | 90.5                     | 3.9       | 92.5                    | 8.8       |
| 28  | Butachlor             | 0.002 | 0.007 | 1.0000         | 42.5   | 78.7                     | 4.4       | 76.8                     | 4.6       | 72.6                    | 1.4       | 99.7                     | 11.3      | 91.5                     | 5.9       | 92.3                    | 15.7      |
| 29  | Butafenacil           | 0.003 | 0.009 | 0.9993         | 115.7  | 61.9                     | 6.4       | 96.9                     | 2.7       | 70.5                    | 1.2       | 100.6                    | 31.5      | 96.1                     | 24.3      | 96.8                    | 22.9      |
| 30  | Butralin              | 0.002 | 0.006 | 0.9993         | 47.1   | 83.6                     | 5.4       | 78.2                     | 2.8       | 74.7                    | 2.0       | 90.5                     | 10.2      | 88.6                     | 3.5       | 95.7                    | 15.9      |
| 31  | Butylate              | 0.003 | 0.008 | 0.9950         | 31.3   | 77.7                     | 2.0       | 87.4                     | 4.7       | 79.3                    | 7.2       | 89.3                     | 10.7      | 89.0                     | 11.6      | 89.6                    | 3.9       |
| 32  | Cadusafos             | 0.003 | 0.008 | 0.9995         | 81.5   | 71.2                     | 4.8       | 75.6                     | 3.6       | 73.1                    | 3.0       | 94.7                     | 15.5      | 88.2                     | 4.7       | 89.8                    | 11.3      |
| 33  | Carbophenothion       | 0.002 | 0.007 | 1.0000         | 59.3   | 70.5                     | 8.0       | 83.8                     | 2.3       | 72.2                    | 8.5       | 99.2                     | 19.0      | 88.0                     | 11.5      | 91.6                    | 20.0      |
| 34  | Carboxin              | 0.001 | 0.004 | 1.0000         | 59.1   | 75.5                     | 4.2       | 75.5                     | 3.3       | 75.0                    | 1.3       | 105.9                    | 18.1      | 98.1                     | 13.2      | 105.4                   | 18.1      |
| 35  | Carfentrazone-ethyl   | 0.002 | 0.007 | 0.9999         | 46.5   | 97.2                     | 5.6       | 94.6                     | 7.5       | 94.4                    | 4.0       | 91.1                     | 20.1      | 92.9                     | 30.2      | 92.7                    | 33.0      |
| 36  | Chinomethionat        | 0.002 | 0.007 | 1.0000         | 5.0    | 70.4                     | 11.9      | 76.3                     | 4.8       | 75.6                    | 6.9       | 77.4                     | 34.9      | 74.9                     | 38.3      | 70.0                    | 63.1      |
| 37  | Chlorbenside          | 0.002 | 0.006 | 0.9995         | 28.7   | 80.6                     | 3.5       | 82.7                     | 2.9       | 78.4                    | 1.1       | 91.9                     | 5.6       | 86.5                     | 6.7       | 86.1                    | 8.8       |
| 38  | Chlorbufam            | 0.002 | 0.007 | 0.9997         | 86.3   | 71.2                     | 10.3      | 72.0                     | 5.9       | 77.2                    | 10.5      | 80.4                     | 2.8       | 80.0                     | 11.3      | 86.1                    | 21.2      |
| 39  | Chlordane- <i>cis</i> | 0.002 | 0.005 | 0.9991         | 19.2   | 85.8                     | 0.7       | 92.0                     | 2.3       | 87.7                    | 0.8       | 95.9                     | 0.5       | 95.5                     | 7.7       | 93.4                    | 4.3       |

| No. | Analyte                 | LOD   | LOQ   | R <sup>2</sup> | ME.(%) | Repeatability (n=5)      |           |                          |           |                         |           | Reproducibility (n=11)   |           |                          |           |                         |           |
|-----|-------------------------|-------|-------|----------------|--------|--------------------------|-----------|--------------------------|-----------|-------------------------|-----------|--------------------------|-----------|--------------------------|-----------|-------------------------|-----------|
|     |                         |       |       |                |        | 0.01 mg kg <sup>-1</sup> |           | 0.02 mg kg <sup>-1</sup> |           | 0.1 mg kg <sup>-1</sup> |           | 0.01 mg kg <sup>-1</sup> |           | 0.02 mg kg <sup>-1</sup> |           | 0.1 mg kg <sup>-1</sup> |           |
|     |                         |       |       |                |        | Rec.<br>(%)              | CV<br>(%) | Rec.<br>(%)              | CV<br>(%) | Rec.<br>(%)             | CV<br>(%) | Rec.<br>(%)              | CV<br>(%) | Rec.<br>(%)              | CV<br>(%) | Rec.<br>(%)             | CV<br>(%) |
|     | Chlordane- <i>trans</i> | 0.002 | 0.007 | 0.9997         | 12.9   | 89.3                     | 1.9       | 93.5                     | 3.5       | 89.7                    | 1.0       | 97.8                     | 1.5       | 95.8                     | 8.5       | 92.8                    | 7.7       |
| 40  | Chlorethoxyfos          | 0.003 | 0.008 | 0.9988         | 22.7   | 83.2                     | 8.4       | 97.8                     | 7.5       | 100.2                   | 5.1       | 98.6                     | 7.9       | 98.3                     | 12.4      | 102.6                   | 8.1       |
| 41  | Chlorfenapyr            | 0.003 | 0.009 | 0.9999         | 33.9   | 80.5                     | 4.7       | 80.4                     | 6.4       | 76.4                    | 1.8       | 95.0                     | 9.4       | 93.1                     | 4.6       | 94.7                    | 10.4      |
| 42  | Chlorfenson             | 0.002 | 0.006 | 0.9993         | 26.2   | 81.6                     | 4.4       | 83.1                     | 4.2       | 77.4                    | 1.2       | 96.8                     | 9.0       | 91.2                     | 4.8       | 90.4                    | 11.5      |
| 43  | Chlorflurenol-methyl    | 0.002 | 0.006 | 1.0000         | 89.3   | 66.8                     | 6.0       | 95.0                     | 3.0       | 77.0                    | 7.0       | 97.6                     | 21.9      | 91.8                     | 13.4      | 94.2                    | 18.5      |
| 44  | Chlornitrofen           | 0.002 | 0.007 | 0.9997         | 44.5   | 81.4                     | 4.9       | 80.3                     | 3.9       | 72.5                    | 0.9       | 99.0                     | 11.7      | 93.4                     | 3.9       | 96.0                    | 15.8      |
| 45  | Chlorobenzilate         | 0.002 | 0.007 | 0.9997         | 51.4   | 75.5                     | 4.3       | 78.2                     | 3.0       | 76.8                    | 1.3       | 99.3                     | 15.7      | 94.3                     | 7.0       | 94.5                    | 12.3      |
| 46  | Chloropropylate         | 0.003 | 0.008 | 0.9998         | 49.1   | 75.5                     | 4.3       | 78.2                     | 3.0       | 76.8                    | 1.3       | 99.4                     | 15.7      | 92.1                     | 6.9       | 93.5                    | 13.1      |
| 47  | Chloroneb               | 0.002 | 0.007 | 0.9969         | 30.0   | 84.6                     | 2.5       | 93.2                     | 3.2       | 85.2                    | 4.7       | 89.1                     | 5.1       | 92.8                     | 10.5      | 97.6                    | 6.3       |
| 48  | Chlorothalonil          | 0.001 | 0.004 | 0.9455         | -21.1  | 73.9                     | 10.2      | 70.1                     | 22.6      | 54.0                    | 11.7      | 58.1                     | 83.4      | 80.2                     | 11.9      | 115.3                   | 62.7      |
| 49  | Chlorpropham            | 0.003 | 0.008 | 0.9987         | 81.8   | 82.7                     | 5.1       | 81.5                     | 4.1       | 74.4                    | 2.1       | 102.2                    | 8.7       | 92.3                     | 8.1       | 93.3                    | 10.5      |
| 50  | Chlorpyrifos            | 0.002 | 0.007 | 0.9994         | 32.4   | 79.8                     | 4.3       | 81.1                     | 4.4       | 76.3                    | 2.1       | 94.9                     | 7.7       | 92.3                     | 4.6       | 91.0                    | 7.9       |
| 51  | Chlorpyrifos-methyl     | 0.002 | 0.007 | 0.9999         | 24.3   | 73.8                     | 6.3       | 75.5                     | 7.4       | 71.9                    | 2.3       | 96.5                     | 13.2      | 89.9                     | 8.6       | 89.1                    | 9.3       |
| 52  | Chlorthal-dimethyl      | 0.002 | 0.007 | 0.9996         | 22.5   | 82.9                     | 3.8       | 85.7                     | 3.3       | 80.4                    | 1.1       | 98.1                     | 6.3       | 94.1                     | 3.3       | 93.4                    | 5.8       |
| 53  | Chlorthion              | 0.002 | 0.007 | 0.9997         | 105.8  | 63.6                     | 13.7      | 87.6                     | 2.8       | 72.3                    | 9.4       | 95.9                     | 25.7      | 84.5                     | 12.9      | 93.0                    | 16.9      |
| 54  | Chlorthiophos           | 0.002 | 0.007 | 1.0000         | 38.0   | 74.3                     | 6.7       | 75.5                     | 5.4       | 73.0                    | 1.3       | 96.3                     | 13.0      | 91.5                     | 7.3       | 91.8                    | 12.1      |
| 55  | Chlozolinate            | 0.002 | 0.007 | 1.0000         | 19.8   | 63.7                     | 9.0       | 70.2                     | 2.8       | 70.3                    | 4.0       | 77.7                     | 39.6      | 79.6                     | 16.8      | 83.2                    | 23.5      |
| 56  | Cinmethylin             | 0.003 | 0.008 | 0.9998         | 24.5   | 74.9                     | 3.8       | 79.8                     | 2.7       | 77.7                    | 1.5       | 95.7                     | 21.9      | 93.7                     | 4.9       | 90.6                    | 6.1       |
| 57  | Clomazone               | 0.002 | 0.007 | 0.9996         | 44.6   | 96.8                     | 4.3       | 101.5                    | 4.8       | 99.8                    | 1.7       | 98.9                     | 9.9       | 94.3                     | 17.2      | 97.2                    | 15.3      |
| 58  | Coumaphos               | 0.003 | 0.008 | 0.9999         | 51.0   | 68.5                     | 17.2      | 96.9                     | 7.4       | 84.6                    | 8.5       | 95.9                     | 18.2      | 95.4                     | 19.8      | 92.9                    | 23.6      |
| 59  | Cyanophos               | 0.003 | 0.008 | 0.9993         | 35.7   | 75.1                     | 10.5      | 73.9                     | 7.6       | 90.2                    | 9.4       | 95.0                     | 11.2      | 90.8                     | 14.6      | 90.7                    | 13.8      |
| 60  | Cyflufenamid            | 0.002 | 0.007 | 0.9999         | 67.8   | 83.0                     | 4.6       | 85.8                     | 3.8       | 83.3                    | 1.1       | 98.2                     | 7.7       | 96.5                     | 1.6       | 99.6                    | 12.9      |
| 61  | Cyfluthrin              | 0.003 | 0.009 | 0.9989         | 102.2  | 53.0                     | 10.4      | 62.3                     | 5.8       | 60.5                    | 5.1       | 87.1                     | 33.3      | 88.0                     | 25.3      | 96.8                    | 36.8      |

| No. | Analyte                  | LOD   | LOQ   | R <sup>2</sup> | ME.(%) | Repeatability (n=5)      |           |                          |           |                         |           | Reproducibility (n=11)   |           |                          |           |                         |           |
|-----|--------------------------|-------|-------|----------------|--------|--------------------------|-----------|--------------------------|-----------|-------------------------|-----------|--------------------------|-----------|--------------------------|-----------|-------------------------|-----------|
|     |                          |       |       |                |        | 0.01 mg kg <sup>-1</sup> |           | 0.02 mg kg <sup>-1</sup> |           | 0.1 mg kg <sup>-1</sup> |           | 0.01 mg kg <sup>-1</sup> |           | 0.02 mg kg <sup>-1</sup> |           | 0.1 mg kg <sup>-1</sup> |           |
|     |                          |       |       |                |        | Rec.<br>(%)              | CV<br>(%) | Rec.<br>(%)              | CV<br>(%) | Rec.<br>(%)             | CV<br>(%) | Rec.<br>(%)              | CV<br>(%) | Rec.<br>(%)              | CV<br>(%) | Rec.<br>(%)             | CV<br>(%) |
| 62  | Cyhalofop-butyl          | 0.003 | 0.008 | 0.9999         | 108.5  | 54.9                     | 7.0       | 57.0                     | 5.0       | 60.7                    | 2.0       | 53.4                     | 49.4      | 67.2                     | 53.1      | 77.0                    | 50.9      |
| 63  | Cyhalothrin, $\gamma$ -  | 0.003 | 0.008 | 0.9996         | 78.3   | 79.5                     | 6.6       | 72.4                     | 4.5       | 62.3                    | 4.3       | 96.0                     | 6.6       | 91.2                     | 10.7      | 89.2                    | 18.7      |
|     | Cyhalothrin, $\lambda$ - | 0.003 | 0.009 | 1.0000         | 118.7  | 56.2                     | 8.0       | 58.5                     | 6.1       | 59.4                    | 2.6       | 82.9                     | 21.6      | 87.0                     | 7.1       | 85.3                    | 21.6      |
| 64  | Cypermethrin             | 0.002 | 0.007 | 0.9999         | 54.5   | 56.0                     | 8.8       | 61.8                     | 6.2       | 62.1                    | 3.5       | 87.1                     | 32.4      | 87.7                     | 24.3      | 98.2                    | 38.7      |
| 65  | Cyprazine                | 0.002 | 0.005 | 1.0000         | 29.7   | 80.1                     | 4.0       | 78.7                     | 3.8       | 74.4                    | 1.3       | 94.0                     | 8.3       | 90.7                     | 4.5       | 95.2                    | 11.7      |
| 66  | Cyprodinil               | 0.002 | 0.007 | 0.9999         | 41.6   | 81.1                     | 3.4       | 83.3                     | 2.9       | 79.1                    | 0.7       | 98.4                     | 7.6       | 94.4                     | 7.0       | 94.0                    | 6.2       |
| 67  | DDD, $p,p'$ -            | 0.002 | 0.007 | 1.0000         | 2.4    | 91.7                     | 3.1       | 93.6                     | 2.4       | 90.4                    | 1.1       | 101.0                    | 5.0       | 98.5                     | 4.8       | 98.8                    | 6.4       |
|     | DDE, $p,p'$ -            | 0.001 | 0.004 | 0.9998         | 22.9   | 81.4                     | 3.2       | 85.9                     | 1.9       | 79.7                    | 0.8       | 89.3                     | 7.5       | 89.8                     | 8.3       | 87.6                    | 1.6       |
|     | DDT, $o,p'$ -            | 0.002 | 0.006 | 0.9994         | -1.6   | 90.0                     | 9.9       | 112.2                    | 25.8      | 126.6                   | 20.2      | 95.6                     | 4.7       | 95.8                     | 8.4       | 82.2                    | 12.1      |
|     | DDT, $p,p'$ -            | 0.003 | 0.008 | 0.9990         | -4.4   | 98.3                     | 9.3       | 107.3                    | 32.5      | 101.7                   | 28.5      | 103.1                    | 5.1       | 99.6                     | 9.4       | 107.8                   | 9.1       |
| 68  | Deltamethrin             | 0.003 | 0.008 | 0.9988         | 119.5  | 77.0                     | 10.5      | 81.7                     | 3.3       | 75.2                    | 5.2       | 77.9                     | 17.4      | 75.0                     | 23.2      | 79.0                    | 5.0       |
| 69  | Desmetryn                | 0.002 | 0.007 | 1.0000         | 46.4   | 82.0                     | 3.8       | 82.2                     | 3.3       | 78.2                    | 2.0       | 97.0                     | 5.6       | 92.7                     | 7.8       | 94.3                    | 7.8       |
| 70  | Dialifor                 | 0.003 | 0.008 | 1.0000         | 20.1   | 71.8                     | 10.6      | 71.3                     | 6.8       | 70.2                    | 2.5       | 98.8                     | 17.4      | 92.7                     | 12.7      | 97.6                    | 21.7      |
| 71  | Di-Allate                | 0.003 | 0.008 | 0.9991         | 39.9   | 77.8                     | 1.6       | 84.4                     | 3.9       | 78.7                    | 2.9       | 90.9                     | 5.7       | 86.6                     | 7.2       | 87.9                    | 9.7       |
| 72  | Diazinon                 | 0.003 | 0.008 | 0.9998         | 33.2   | 83.0                     | 3.9       | 84.8                     | 2.9       | 80.6                    | 2.1       | 95.2                     | 3.4       | 93.7                     | 8.1       | 96.5                    | 6.8       |
| 73  | Dichlobenil              | 0.002 | 0.006 | 0.9956         | 11.7   | 78.9                     | 4.8       | 91.3                     | 4.2       | 86.3                    | 4.3       | 94.7                     | 6.7       | 94.0                     | 10.5      | 93.0                    | 4.7       |
| 74  | Dichlofenthion           | 0.002 | 0.007 | 0.9998         | 35.1   | 79.3                     | 3.0       | 82.5                     | 3.8       | 79.2                    | 1.7       | 94.4                     | 5.8       | 90.3                     | 4.9       | 90.8                    | 6.3       |
| 75  | Dichlofluanid            | 0.001 | 0.003 | 0.9319         | 65.1   | 75.5                     | 4.9       | 77.6                     | 2.3       | 71.8                    | 5.6       | 97.7                     | 33.4      | 87.9                     | 19.6      | 111.4                   | 66.0      |
| 76  | Dichlormid               | 0.003 | 0.008 | 0.9974         | 33.8   | 85.3                     | 9.8       | 100.3                    | 6.1       | 98.1                    | 5.4       | 97.5                     | 4.0       | 98.5                     | 13.4      | 104.1                   | 4.1       |
| 77  | Diclobutrazol            | 0.001 | 0.004 | 1.0000         | 195.1  | 64.1                     | 7.3       | 87.1                     | 2.1       | 70.4                    | 2.1       | 94.2                     | 21.7      | 91.1                     | 16.6      | 82.9                    | 9.1       |
| 78  | Diclofop-methyl          | 0.002 | 0.007 | 0.9998         | 66.3   | 67.9                     | 2.3       | 98.6                     | 12.9      | 88.2                    | 14.8      | 77.1                     | 32.4      | 87.4                     | 14.2      | 97.7                    | 13.2      |
| 79  | Dicloran                 | 0.003 | 0.008 | 0.9999         | 64.6   | 72.7                     | 10.6      | 73.1                     | 11.2      | 94.8                    | 5.6       | 91.7                     | 11.5      | 92.0                     | 15.8      | 91.8                    | 17.5      |
| 80  | Dicofol                  | 0.002 | 0.006 | 1.0000         | 28.7   | 65.7                     | 4.4       | 85.4                     | 3.0       | 97.3                    | 3.9       | 88.7                     | 15.5      | 92.5                     | 6.2       | 98.8                    | 8.6       |

| No. | Analyte                | LOD   | LOQ   | R <sup>2</sup> | ME.(%) | Repeatability (n=5)      |           |                          |           |                         |           | Reproducibility (n=11)   |           |                          |           |                         |           |
|-----|------------------------|-------|-------|----------------|--------|--------------------------|-----------|--------------------------|-----------|-------------------------|-----------|--------------------------|-----------|--------------------------|-----------|-------------------------|-----------|
|     |                        |       |       |                |        | 0.01 mg kg <sup>-1</sup> |           | 0.02 mg kg <sup>-1</sup> |           | 0.1 mg kg <sup>-1</sup> |           | 0.01 mg kg <sup>-1</sup> |           | 0.02 mg kg <sup>-1</sup> |           | 0.1 mg kg <sup>-1</sup> |           |
|     |                        |       |       |                |        | Rec.<br>(%)              | CV<br>(%) | Rec.<br>(%)              | CV<br>(%) | Rec.<br>(%)             | CV<br>(%) | Rec.<br>(%)              | CV<br>(%) | Rec.<br>(%)              | CV<br>(%) | Rec.<br>(%)             | CV<br>(%) |
| 81  | Dicrotophos            | 0.002 | 0.007 | 0.9988         | 187.2  | 64.6                     | 13.9      | 71.2                     | 19.8      | 88.6                    | 11.7      | 93.7                     | 20.7      | 84.6                     | 5.6       | 93.3                    | 13.7      |
| 82  | Diethatyl-ethyl        | 0.002 | 0.007 | 0.9995         | 50.3   | 87.4                     | 5.1       | 86.8                     | 5.0       | 82.2                    | 1.1       | 101.0                    | 5.1       | 98.2                     | 4.8       | 101.3                   | 10.5      |
| 83  | Diethofencarb          | 0.002 | 0.007 | 0.9999         | 155.7  | 69.5                     | 6.8       | 89.5                     | 2.2       | 73.8                    | 8.9       | 97.6                     | 18.2      | 91.8                     | 14.2      | 94.8                    | 19.9      |
| 84  | Difenoconazole         | 0.003 | 0.008 | 1.0000         | 305.5  | 65.4                     | 1.5       | 92.2                     | 7.1       | 73.9                    | 7.7       | 118.0                    | 0.8       | 101.3                    | 19.6      | 91.5                    | 21.3      |
| 85  | Diflufenican           | 0.002 | 0.007 | 1.0000         | 122.0  | 62.4                     | 7.1       | 75.1                     | 2.4       | 93.7                    | 7.9       | 97.2                     | 24.8      | 92.9                     | 20.7      | 93.8                    | 24.7      |
| 86  | Dimepiperate           | 0.002 | 0.007 | 1.0000         | 47.5   | 72.6                     | 3.6       | 73.5                     | 3.8       | 72.4                    | 0.8       | 92.3                     | 11.4      | 87.6                     | 5.9       | 91.9                    | 13.9      |
| 87  | Dimethachlor           | 0.002 | 0.007 | 0.9999         | 23.3   | 86.4                     | 3.6       | 85.9                     | 4.4       | 80.2                    | 0.8       | 101.6                    | 4.8       | 95.3                     | 5.6       | 94.7                    | 8.3       |
| 88  | Dimethametryn          | 0.001 | 0.003 | 1.0000         | 42.4   | 77.1                     | 3.4       | 77.9                     | 3.0       | 76.4                    | 0.9       | 95.8                     | 10.3      | 91.2                     | 4.5       | 92.7                    | 12.0      |
| 89  | Dimethenamid           | 0.002 | 0.007 | 0.9999         | 25.3   | 82.1                     | 3.5       | 83.6                     | 3.5       | 80.5                    | 1.2       | 98.3                     | 6.4       | 93.8                     | 5.8       | 94.5                    | 9.2       |
| 90  | Dimethipin             | 0.003 | 0.009 | 0.9954         | -31.9  | 82.2                     | 11.0      | 74.2                     | 11.3      | 90.3                    | 13.6      | 106.5                    | 14.3      | 92.6                     | 10.6      | 94.6                    | 28.7      |
| 91  | Dimethomorph (E)       | 0.003 | 0.008 | 1.0000         | 136.2  | 30.7                     | 20.7      | 94.2                     | 6.1       | 76.4                    | 8.9       | 71.1                     | 55.2      | 91.5                     | 40.4      | 98.0                    | 37.9      |
|     | Dimethomorph (Z)       | 0.003 | 0.009 | 0.9992         | 137.3  | 23.7                     | 28.7      | 93.2                     | 8.1       | 82.3                    | 9.0       | 85.9                     | 61.1      | 93.7                     | 45.5      | 101.9                   | 38.0      |
| 92  | Dimethylvinphos (E)    | 0.002 | 0.007 | 0.9996         | 52.2   | 73.7                     | 12.7      | 74.8                     | 15.8      | 70.8                    | 6.0       | 99.4                     | 15.2      | 92.7                     | 10.2      | 96.7                    | 16.6      |
|     | Dimethylvinphos (Z)    | 0.002 | 0.007 | 0.9996         | 89.8   | 81.4                     | 11.8      | 77.4                     | 14.7      | 76.5                    | 11.8      | 102.9                    | 10.6      | 95.7                     | 11.8      | 96.3                    | 17.4      |
| 93  | Diniconazole           | 0.002 | 0.006 | 0.9996         | 166.9  | 95.3                     | 9.2       | 93.2                     | 2.7       | 74.3                    | 6.9       | 94.7                     | 30.9      | 91.5                     | 23.1      | 82.8                    | 14.6      |
| 94  | Dinitramine            | 0.002 | 0.007 | 0.9999         | 55.9   | 82.8                     | 5.0       | 80.8                     | 2.8       | 76.6                    | 1.2       | 94.9                     | 8.1       | 85.1                     | 5.0       | 95.8                    | 16.1      |
| 95  | Dioxathion             | 0.002 | 0.007 | 1.0000         | 37.5   | 87.5                     | 1.6       | 87.0                     | 3.6       | 78.6                    | 2.1       | 95.4                     | 2.8       | 91.0                     | 10.8      | 95.6                    | 8.1       |
| 96  | Diphenamid             | 0.002 | 0.007 | 1.0000         | 24.8   | 84.5                     | 2.9       | 83.6                     | 2.5       | 79.8                    | 1.0       | 98.6                     | 6.3       | 93.0                     | 0.9       | 93.9                    | 10.1      |
| 97  | Diphenylamine          | 0.003 | 0.008 | 0.9985         | 48.7   | 79.7                     | 3.1       | 80.7                     | 4.5       | 76.2                    | 3.6       | 92.9                     | 4.1       | 90.5                     | 10.3      | 90.1                    | 5.4       |
| 98  | Dithiopyr              | 0.002 | 0.007 | 0.9999         | 23.2   | 79.0                     | 4.4       | 82.5                     | 3.0       | 79.6                    | 0.7       | 95.3                     | 7.9       | 93.8                     | 5.0       | 93.3                    | 10.7      |
| 99  | Edifenphos             | 0.001 | 0.004 | 0.9986         | 54.6   | 67.4                     | 12.7      | 88.8                     | 4.5       | 83.1                    | 9.1       | 98.1                     | 23.0      | 100.0                    | 6.9       | 105.6                   | 26.8      |
| 100 | Endosulfan, $\alpha$ - | 0.003 | 0.008 | 0.9992         | 15.3   | 85.6                     | 3.5       | 90.4                     | 3.2       | 83.4                    | 1.3       | 95.6                     | 1.0       | 92.0                     | 8.1       | 94.8                    | 5.2       |
|     | Endosulfan, $\beta$ -  | 0.002 | 0.007 | 0.9998         | 3.7    | 92.9                     | 2.9       | 93.6                     | 6.0       | 88.1                    | 3.7       | 97.3                     | 11.3      | 98.1                     | 5.5       | 97.3                    | 5.1       |

| No. | Analyte              | LOD   | LOQ   | R <sup>2</sup> | ME.(%) | Repeatability (n=5)      |           |                          |           |                         |           | Reproducibility (n=11)   |           |                          |           |                         |           |
|-----|----------------------|-------|-------|----------------|--------|--------------------------|-----------|--------------------------|-----------|-------------------------|-----------|--------------------------|-----------|--------------------------|-----------|-------------------------|-----------|
|     |                      |       |       |                |        | 0.01 mg kg <sup>-1</sup> |           | 0.02 mg kg <sup>-1</sup> |           | 0.1 mg kg <sup>-1</sup> |           | 0.01 mg kg <sup>-1</sup> |           | 0.02 mg kg <sup>-1</sup> |           | 0.1 mg kg <sup>-1</sup> |           |
|     |                      |       |       |                |        | Rec.<br>(%)              | CV<br>(%) | Rec.<br>(%)              | CV<br>(%) | Rec.<br>(%)             | CV<br>(%) | Rec.<br>(%)              | CV<br>(%) | Rec.<br>(%)              | CV<br>(%) | Rec.<br>(%)             | CV<br>(%) |
|     | Endosulfan, sulfate- | 0.002 | 0.006 | 1.0000         | 11.5   | 78.9                     | 2.7       | 80.9                     | 2.8       | 76.4                    | 0.6       | 95.0                     | 20.6      | 93.0                     | 7.9       | 100.2                   | 15.9      |
| 101 | Endrin               | 0.002 | 0.006 | 0.9999         | 18.1   | 100.3                    | 1.8       | 107.0                    | 5.2       | 105.2                   | 2.3       | 100.3                    | 9.6       | 101.2                    | 15.5      | 100.8                   | 15.4      |
|     | δ-keto-Endrin        | 0.002 | 0.007 | 0.9999         | 18.9   | 79.4                     | 4.3       | 79.8                     | 4.1       | 75.6                    | 4.7       | 89.0                     | 9.9       | 88.0                     | 12.8      | 89.3                    | 9.4       |
| 102 | EPN                  | 0.003 | 0.008 | 0.9992         | 46.2   | 76.1                     | 6.7       | 72.2                     | 5.1       | 79.5                    | 12.4      | 95.3                     | 14.3      | 91.7                     | 11.9      | 84.7                    | 13.7      |
| 103 | Epoxiconazole        | 0.002 | 0.007 | 0.9999         | 56.4   | 85.0                     | 4.5       | 86.0                     | 2.9       | 86.6                    | 1.8       | 103.5                    | 7.7       | 102.0                    | 6.7       | 96.3                    | 12.0      |
| 104 | EPTC                 | 0.003 | 0.009 | 0.9972         | 10.6   | 76.1                     | 2.0       | 87.4                     | 5.9       | 81.2                    | 6.3       | 88.7                     | 8.7       | 89.5                     | 8.6       | 92.6                    | 7.0       |
| 105 | Etaconazole-1        | 0.002 | 0.005 | 1.0000         | 45.6   | 68.8                     | 16.7      | 77.3                     | 2.3       | 77.0                    | 1.4       | 91.6                     | 16.3      | 92.9                     | 6.5       | 95.8                    | 10.4      |
|     | Etaconazole-2        | 0.003 | 0.008 | 0.9999         | 28.6   | 85.2                     | 4.6       | 81.3                     | 6.1       | 79.5                    | 1.1       | 100.4                    | 8.2       | 93.3                     | 4.5       | 96.9                    | 12.6      |
| 106 | Ethalfuralin         | 0.003 | 0.008 | 0.9997         | 43.8   | 80.2                     | 4.0       | 81.3                     | 4.5       | 77.0                    | 3.5       | 92.6                     | 5.2       | 87.6                     | 4.7       | 93.1                    | 12.7      |
| 107 | Ethion               | 0.002 | 0.007 | 0.9997         | 47.3   | 68.3                     | 7.7       | 93.0                     | 2.1       | 76.1                    | 7.7       | 92.4                     | 15.6      | 89.0                     | 11.8      | 95.4                    | 21.0      |
| 108 | Ethofumesate         | 0.002 | 0.007 | 1.0000         | 31.3   | 81.1                     | 3.4       | 82.1                     | 3.0       | 78.9                    | 0.8       | 97.4                     | 8.1       | 93.7                     | 4.1       | 93.9                    | 10.2      |
| 109 | Ethoprophos          | 0.002 | 0.007 | 0.9989         | 87.2   | 70.2                     | 6.4       | 75.6                     | 5.0       | 73.2                    | 3.5       | 88.4                     | 14.1      | 86.2                     | 2.2       | 87.4                    | 13.7      |
| 110 | Ethychlozate         | 0.002 | 0.007 | 0.9998         | 127.5  | 74.3                     | 5.4       | 93.4                     | 3.2       | 75.0                    | 5.6       | 96.3                     | 15.0      | 87.8                     | 10.2      | 93.5                    | 24.5      |
| 111 | Etoxazole            | 0.002 | 0.007 | 0.9996         | 63.6   | 76.4                     | 4.5       | 73.0                     | 3.9       | 74.3                    | 1.3       | 98.1                     | 11.8      | 92.9                     | 11.2      | 94.9                    | 16.7      |
| 112 | Etridiazole          | 0.003 | 0.009 | 0.9966         | 33.4   | 80.9                     | 7.1       | 93.8                     | 7.3       | 87.8                    | 12.6      | 92.9                     | 2.8       | 93.2                     | 11.3      | 98.3                    | 2.2       |
| 113 | Fenamidone           | 0.002 | 0.007 | 0.9992         | 47.2   | 80.0                     | 3.9       | 76.9                     | 2.6       | 77.6                    | 0.9       | 103.5                    | 12.2      | 96.3                     | 9.8       | 98.4                    | 16.3      |
| 114 | Fenarimol            | 0.002 | 0.007 | 0.9996         | 78.8   | 68.7                     | 5.0       | 96.4                     | 3.4       | 71.1                    | 1.6       | 93.9                     | 19.6      | 90.0                     | 17.7      | 92.4                    | 25.7      |
| 115 | Fenbuconazole        | 0.002 | 0.007 | 0.9983         | 95.7   | 103.4                    | 5.9       | 93.4                     | 5.4       | 76.8                    | 6.1       | 91.0                     | 25.3      | 89.4                     | 23.0      | 91.1                    | 27.0      |
| 116 | Fenchlorphos         | 0.002 | 0.007 | 0.9999         | 34.3   | 71.3                     | 5.9       | 74.7                     | 5.7       | 72.4                    | 2.3       | 88.0                     | 8.9       | 86.2                     | 6.4       | 88.2                    | 8.5       |
| 117 | Fenclorim            | 0.003 | 0.008 | 0.9986         | 38.9   | 83.3                     | 2.6       | 87.2                     | 3.6       | 77.7                    | 3.7       | 94.8                     | 6.4       | 90.8                     | 12.0      | 88.4                    | 2.1       |
| 118 | Fenfuram             | 0.002 | 0.007 | 1.0000         | 48.6   | 77.7                     | 3.0       | 79.8                     | 1.6       | 77.1                    | 1.7       | 96.6                     | 9.5       | 88.3                     | 1.5       | 91.9                    | 11.2      |
| 119 | Fenitrothion         | 0.003 | 0.008 | 0.9997         | 83.5   | 72.4                     | 7.8       | 89.5                     | 2.5       | 78.2                    | 9.3       | 93.1                     | 11.9      | 84.1                     | 8.3       | 91.9                    | 23.9      |
| 120 | Fenobucarb           | 0.003 | 0.008 | 0.9979         | 57.5   | 77.2                     | 9.3       | 76.8                     | 10.1      | 92.3                    | 17.5      | 94.2                     | 11.8      | 86.7                     | 3.5       | 85.9                    | 16.1      |

| No. | Analyte            | LOD   | LOQ   | R <sup>2</sup> | ME.(%) | Repeatability (n=5)      |           |                          |           |                         |           | Reproducibility (n=11)   |           |                          |           |                         |           |
|-----|--------------------|-------|-------|----------------|--------|--------------------------|-----------|--------------------------|-----------|-------------------------|-----------|--------------------------|-----------|--------------------------|-----------|-------------------------|-----------|
|     |                    |       |       |                |        | 0.01 mg kg <sup>-1</sup> |           | 0.02 mg kg <sup>-1</sup> |           | 0.1 mg kg <sup>-1</sup> |           | 0.01 mg kg <sup>-1</sup> |           | 0.02 mg kg <sup>-1</sup> |           | 0.1 mg kg <sup>-1</sup> |           |
|     |                    |       |       |                |        | Rec.<br>(%)              | CV<br>(%) | Rec.<br>(%)              | CV<br>(%) | Rec.<br>(%)             | CV<br>(%) | Rec.<br>(%)              | CV<br>(%) | Rec.<br>(%)              | CV<br>(%) | Rec.<br>(%)             | CV<br>(%) |
| 121 | Fenothiocarb       | 0.002 | 0.006 | 0.9994         | 93.7   | 74.3                     | 3.1       | 75.3                     | 3.4       | 74.8                    | 0.8       | 91.3                     | 15.0      | 83.5                     | 13.8      | 87.1                    | 20.5      |
| 122 | Fenoxanil          | 0.002 | 0.007 | 0.9996         | 176.2  | 81.0                     | 6.8       | 80.6                     | 5.1       | 70.2                    | 2.9       | 100.5                    | 13.3      | 92.9                     | 8.3       | 92.0                    | 20.4      |
| 123 | Fenpropathrin      | 0.002 | 0.007 | 0.9989         | 46.3   | 81.5                     | 4.5       | 75.1                     | 3.5       | 74.7                    | 0.9       | 98.3                     | 7.3       | 91.6                     | 7.9       | 96.3                    | 17.1      |
| 124 | Fenpropimorph      | 0.002 | 0.007 | 1.0000         | 40.0   | 81.3                     | 2.4       | 82.3                     | 2.4       | 78.6                    | 1.4       | 93.5                     | 4.0       | 87.6                     | 5.2       | 89.6                    | 12.2      |
| 125 | Fenpyrazamine      | 0.002 | 0.007 | 0.9999         | 99.2   | 90.8                     | 4.6       | 90.7                     | 5.5       | 78.9                    | 5.7       | 80.4                     | 26.9      | 95.2                     | 25.1      | 82.5                    | 19.0      |
| 126 | Fenson             | 0.002 | 0.007 | 0.9999         | 12.8   | 85.9                     | 3.9       | 86.7                     | 3.9       | 79.5                    | 1.0       | 101.6                    | 5.6       | 98.6                     | 8.5       | 96.8                    | 7.6       |
| 127 | Fenthion           | 0.003 | 0.008 | 0.9998         | 37.5   | 75.0                     | 6.5       | 74.3                     | 5.6       | 70.9                    | 1.9       | 93.8                     | 9.8       | 88.8                     | 7.2       | 92.0                    | 13.1      |
| 128 | Fenvalerate-1      | 0.003 | 0.008 | 0.9998         | 51.7   | 59.7                     | 7.2       | 62.6                     | 6.7       | 65.8                    | 3.3       | 92.9                     | 26.6      | 90.0                     | 20.4      | 99.0                    | 32.2      |
|     | Fenvalerate-2      | 0.003 | 0.008 | 0.9997         | 128.5  | 58.4                     | 6.8       | 61.3                     | 5.2       | 61.4                    | 4.0       | 93.3                     | 27.7      | 90.9                     | 21.6      | 99.2                    | 33.0      |
| 129 | Fipronil           | 0.002 | 0.007 | 0.9998         | 116.9  | 75.8                     | 5.8       | 77.2                     | 4.0       | 76.4                    | 1.5       | 99.4                     | 17.2      | 97.2                     | 10.2      | 87.9                    | 7.7       |
| 130 | Flamprop-isopropyl | 0.003 | 0.008 | 1.0000         | 29.8   | 78.7                     | 4.2       | 81.8                     | 3.0       | 79.3                    | 0.8       | 97.0                     | 11.7      | 96.2                     | 4.8       | 97.8                    | 10.8      |
| 131 | Fluacrypyrim       | 0.003 | 0.008 | 0.9998         | 72.3   | 75.0                     | 5.5       | 74.3                     | 3.5       | 73.2                    | 0.9       | 97.3                     | 14.1      | 93.0                     | 9.9       | 95.1                    | 18.5      |
| 132 | Fluazifop-butyl    | 0.002 | 0.007 | 0.9998         | 69.3   | 77.7                     | 5.1       | 78.4                     | 4.1       | 76.5                    | 0.8       | 90.7                     | 16.3      | 86.9                     | 10.3      | 94.2                    | 14.5      |
| 133 | Fluchloralin       | 0.002 | 0.006 | 0.9999         | 28.0   | 83.6                     | 5.5       | 80.0                     | 5.8       | 74.4                    | 2.1       | 95.1                     | 3.6       | 86.1                     | 3.7       | 92.1                    | 16.2      |
| 134 | Flucythrinate-1    | 0.003 | 0.008 | 1.0000         | 91.5   | 60.6                     | 9.5       | 90.7                     | 5.4       | 94.5                    | 10.5      | 94.1                     | 25.9      | 92.0                     | 21.3      | 80.0                    | 14.2      |
|     | Flucythrinate-2    | 0.003 | 0.009 | 1.0000         | 99.7   | 63.4                     | 6.5       | 92.7                     | 5.5       | 75.9                    | 10.0      | 97.0                     | 24.2      | 91.5                     | 20.7      | 79.4                    | 13.3      |
| 135 | Fluensulfone       | 0.003 | 0.008 | 0.9994         | 75.8   | 83.1                     | 3.6       | 85.4                     | 5.5       | 79.7                    | 2.5       | 99.6                     | 7.2       | 95.3                     | 11.6      | 97.3                    | 7.8       |
| 136 | Flufenpyr-ethyl    | 0.003 | 0.008 | 0.9994         | 54.8   | 61.3                     | 7.2       | 70.6                     | 2.5       | 70.5                    | 3.0       | 94.5                     | 26.1      | 90.4                     | 17.3      | 98.4                    | 21.9      |
| 137 | Flumetralin        | 0.002 | 0.006 | 0.9995         | 36.6   | 82.3                     | 4.8       | 77.3                     | 3.8       | 71.0                    | 0.9       | 95.2                     | 7.9       | 91.9                     | 6.2       | 97.9                    | 19.6      |
| 138 | Flumioxazin        | 0.003 | 0.009 | 1.0000         | 80.5   | 98.6                     | 5.6       | 93.6                     | 6.7       | 77.6                    | 10.0      | 93.9                     | 22.5      | 100.1                    | 8.3       | 89.4                    | 27.3      |
| 139 | Fluopyram          | 0.002 | 0.007 | 0.9994         | 86.9   | 81.2                     | 5.0       | 78.4                     | 3.5       | 76.8                    | 1.3       | 102.1                    | 10.5      | 95.2                     | 7.9       | 97.7                    | 16.2      |
| 140 | Fluorochloridone   | 0.002 | 0.007 | 0.9999         | 25.1   | 109.9                    | 4.6       | 102.8                    | 9.1       | 96.9                    | 3.0       | 112.9                    | 4.6       | 105.6                    | 9.4       | 95.4                    | 12.9      |
| 141 | Fluquinconazole    | 0.002 | 0.007 | 1.0000         | 31.3   | 70.6                     | 4.2       | 71.6                     | 4.2       | 72.2                    | 1.3       | 99.9                     | 20.1      | 97.9                     | 16.6      | 87.0                    | 9.6       |

| No. | Analyte            | LOD   | LOQ   | R <sup>2</sup> | ME.(%) | Repeatability (n=5)      |           |                          |           |                         |           | Reproducibility (n=11)   |           |                          |           |                         |           |
|-----|--------------------|-------|-------|----------------|--------|--------------------------|-----------|--------------------------|-----------|-------------------------|-----------|--------------------------|-----------|--------------------------|-----------|-------------------------|-----------|
|     |                    |       |       |                |        | 0.01 mg kg <sup>-1</sup> |           | 0.02 mg kg <sup>-1</sup> |           | 0.1 mg kg <sup>-1</sup> |           | 0.01 mg kg <sup>-1</sup> |           | 0.02 mg kg <sup>-1</sup> |           | 0.1 mg kg <sup>-1</sup> |           |
|     |                    |       |       |                |        | Rec.<br>(%)              | CV<br>(%) | Rec.<br>(%)              | CV<br>(%) | Rec.<br>(%)             | CV<br>(%) | Rec.<br>(%)              | CV<br>(%) | Rec.<br>(%)              | CV<br>(%) | Rec.<br>(%)             | CV<br>(%) |
| 142 | Flusilazole        | 0.001 | 0.004 | 1.0000         | 44.3   | 79.1                     | 3.8       | 78.6                     | 3.2       | 76.7                    | 0.6       | 98.4                     | 10.4      | 94.9                     | 7.2       | 97.0                    | 13.3      |
| 143 | Flutianil          | 0.003 | 0.008 | 0.9997         | 81.1   | 70.2                     | 4.6       | 71.0                     | 2.3       | 71.7                    | 1.5       | 101.8                    | 20.7      | 99.6                     | 18.6      | 89.1                    | 11.6      |
| 144 | Fluvalinate-1      | 0.003 | 0.009 | 0.9977         | 51.3   | 25.9                     | 29.7      | 44.6                     | 8.9       | 53.4                    | 6.9       | 112.6                    | 18.6      | 97.2                     | 31.3      | 107.4                   | 48.0      |
|     | Fluvalinate-2      | 0.003 | 0.009 | 0.9989         | 43.0   | 35.0                     | 19.1      | 46.7                     | 14.0      | 55.8                    | 7.4       | 113.9                    | 17.0      | 96.1                     | 28.8      | 106.6                   | 47.7      |
| 145 | Fluxapyroxad       | 0.003 | 0.008 | 0.9995         | 145.5  | 69.8                     | 6.0       | 97.0                     | 3.4       | 74.3                    | 5.7       | 100.5                    | 20.1      | 94.7                     | 16.7      | 85.8                    | 12.0      |
| 146 | Fonofos            | 0.002 | 0.007 | 0.9996         | 33.0   | 81.4                     | 3.7       | 84.8                     | 2.4       | 80.6                    | 2.4       | 96.5                     | 5.6       | 91.6                     | 5.9       | 91.6                    | 6.7       |
| 147 | Formothion         | 0.003 | 0.008 | 0.9993         | 47.8   | 62.7                     | 14.7      | 80.9                     | 5.9       | 74.5                    | 11.8      | 79.9                     | 11.1      | 78.7                     | 16.2      | 96.7                    | 16.1      |
| 148 | Fthalide           | 0.002 | 0.007 | 1.0000         | 20.3   | 81.9                     | 3.9       | 80.2                     | 3.3       | 74.9                    | 0.7       | 98.3                     | 7.0       | 96.1                     | 10.6      | 93.3                    | 10.0      |
| 149 | Halfenprox         | 0.002 | 0.007 | 0.9994         | 65.4   | 81.6                     | 5.1       | 82.0                     | 3.6       | 79.1                    | 2.0       | 92.0                     | 7.7       | 93.3                     | 5.7       | 103.3                   | 25.4      |
| 150 | Heptachlor         | 0.002 | 0.006 | 0.9999         | 31.5   | 96.3                     | 1.2       | 105.1                    | 7.9       | 96.6                    | 4.9       | 98.6                     | 8.2       | 98.9                     | 17.5      | 97.2                    | 9.3       |
|     | Heptachlor epoxide | 0.002 | 0.007 | 0.9998         | 11.5   | 92.1                     | 1.5       | 96.1                     | 3.5       | 89.1                    | 1.2       | 102.9                    | 7.9       | 97.8                     | 11.1      | 94.2                    | 7.6       |
| 151 | Heptenophos        | 0.003 | 0.008 | 0.9981         | 71.7   | 65.6                     | 9.0       | 73.9                     | 10.2      | 71.4                    | 4.9       | 84.8                     | 18.4      | 81.1                     | 8.3       | 86.5                    | 13.3      |
| 152 | Hexythiazox        | 0.002 | 0.006 | 0.9996         | 107.1  | 67.0                     | 6.6       | 106.2                    | 9.0       | 79.2                    | 6.2       | 90.9                     | 15.8      | 85.5                     | 10.7      | 91.1                    | 17.3      |
| 153 | Indanofan          | 0.002 | 0.007 | 1.0000         | 73.2   | 72.7                     | 6.4       | 76.1                     | 6.3       | 75.3                    | 4.9       | 98.9                     | 15.9      | 96.9                     | 11.7      | 102.6                   | 16.2      |
| 154 | Indoxacarb         | 0.002 | 0.007 | 0.9974         | 31.8   | 75.0                     | 6.9       | 74.9                     | 3.9       | 71.2                    | 3.9       | 100.1                    | 18.5      | 97.3                     | 19.1      | 87.7                    | 8.5       |
| 155 | Ipconazole         | 0.002 | 0.007 | 0.9996         | 123.1  | 68.5                     | 7.3       | 94.7                     | 5.0       | 74.6                    | 4.6       | 98.0                     | 21.6      | 93.7                     | 23.4      | 80.0                    | 11.3      |
| 156 | Iprobenfos         | 0.003 | 0.008 | 0.9998         | 136.9  | 68.1                     | 6.5       | 96.2                     | 3.3       | 82.0                    | 9.8       | 94.8                     | 18.2      | 89.6                     | 12.4      | 94.9                    | 19.5      |
| 157 | Iprodione          | 0.003 | 0.009 | 0.9974         | 44.8   | 58.1                     | 15.1      | 65.5                     | 8.1       | 66.7                    | 7.5       | 101.5                    | 38.6      | 94.7                     | 27.4      | 99.8                    | 37.0      |
| 158 | Isazofos           | 0.002 | 0.007 | 0.9999         | 28.7   | 84.0                     | 3.4       | 83.0                     | 4.4       | 79.6                    | 1.4       | 97.3                     | 5.4       | 90.4                     | 2.3       | 92.7                    | 11.2      |
| 159 | Isofenphos         | 0.002 | 0.007 | 1.0000         | 36.1   | 76.2                     | 3.3       | 77.3                     | 3.4       | 75.8                    | 0.9       | 96.5                     | 11.4      | 92.1                     | 6.5       | 95.0                    | 13.8      |
| 160 | Isofenphos-methyl  | 0.003 | 0.008 | 1.0000         | 36.9   | 78.9                     | 3.6       | 77.9                     | 3.3       | 75.8                    | 0.9       | 98.7                     | 9.9       | 93.0                     | 7.0       | 94.5                    | 13.6      |
| 161 | Isoproc carb       | 0.003 | 0.008 | 0.9958         | 58.6   | 65.9                     | 9.8       | 71.5                     | 10.7      | 99.7                    | 19.5      | 91.6                     | 18.7      | 85.6                     | 6.5       | 86.3                    | 17.9      |
| 162 | Isopropalin        | 0.002 | 0.007 | 0.9998         | 39.5   | 82.8                     | 3.0       | 79.0                     | 2.8       | 75.3                    | 1.5       | 95.2                     | 2.9       | 87.6                     | 3.5       | 95.1                    | 14.2      |

| No. | Analyte                 | LOD   | LOQ   | R <sup>2</sup> | ME.(%) | Repeatability (n=5)      |           |                          |           |                         |           | Reproducibility (n=11)   |           |                          |           |                         |           |
|-----|-------------------------|-------|-------|----------------|--------|--------------------------|-----------|--------------------------|-----------|-------------------------|-----------|--------------------------|-----------|--------------------------|-----------|-------------------------|-----------|
|     |                         |       |       |                |        | 0.01 mg kg <sup>-1</sup> |           | 0.02 mg kg <sup>-1</sup> |           | 0.1 mg kg <sup>-1</sup> |           | 0.01 mg kg <sup>-1</sup> |           | 0.02 mg kg <sup>-1</sup> |           | 0.1 mg kg <sup>-1</sup> |           |
|     |                         |       |       |                |        | Rec.<br>(%)              | CV<br>(%) | Rec.<br>(%)              | CV<br>(%) | Rec.<br>(%)             | CV<br>(%) | Rec.<br>(%)              | CV<br>(%) | Rec.<br>(%)              | CV<br>(%) | Rec.<br>(%)             | CV<br>(%) |
| 163 | Isoprothiolane          | 0.002 | 0.006 | 0.9999         | 43.7   | 79.4                     | 4.1       | 81.4                     | 3.5       | 78.2                    | 0.8       | 99.8                     | 10.1      | 95.6                     | 5.7       | 96.1                    | 11.3      |
| 164 | Isopyrazam              | 0.003 | 0.008 | 0.9988         | 143.7  | 69.1                     | 5.0       | 100.3                    | 3.2       | 77.4                    | 7.7       | 99.2                     | 20.9      | 94.9                     | 22.8      | 83.9                    | 12.4      |
| 165 | Isotianil               | 0.003 | 0.008 | 0.9993         | 272.5  | 68.8                     | 5.4       | 102.4                    | 3.0       | 73.3                    | 6.6       | 98.9                     | 21.2      | 90.9                     | 16.2      | 93.8                    | 25.4      |
| 166 | Isoxadifen-ethyl        | 0.002 | 0.007 | 1.0000         | 41.9   | 73.8                     | 4.6       | 73.2                     | 6.1       | 72.7                    | 1.9       | 86.3                     | 17.3      | 85.1                     | 7.1       | 85.5                    | 4.8       |
| 167 | Kresoxim-methyl         | 0.002 | 0.007 | 1.0000         | 25.6   | 83.6                     | 3.5       | 84.2                     | 3.4       | 80.3                    | 0.5       | 98.3                     | 7.7       | 96.1                     | 2.3       | 98.0                    | 11.6      |
| 168 | Leptophos               | 0.002 | 0.007 | 0.9998         | 34.4   | 73.6                     | 6.6       | 70.9                     | 6.8       | 76.6                    | 8.8       | 95.3                     | 12.9      | 96.4                     | 20.0      | 97.3                    | 20.2      |
| 169 | Mefenpyr-diethyl        | 0.002 | 0.007 | 0.9998         | 61.7   | 74.8                     | 4.4       | 72.8                     | 4.1       | 71.6                    | 1.6       | 88.3                     | 24.5      | 86.2                     | 17.4      | 93.3                    | 24.0      |
| 170 | Mepanipyrin             | 0.001 | 0.003 | 0.9995         | 84.5   | 79.4                     | 4.6       | 80.4                     | 3.4       | 76.4                    | 0.6       | 101.8                    | 11.7      | 96.0                     | 8.7       | 96.9                    | 11.4      |
| 171 | Mepronil                | 0.002 | 0.007 | 0.9998         | 129.6  | 68.6                     | 5.5       | 95.0                     | 3.7       | 73.7                    | 6.7       | 101.6                    | 21.6      | 95.6                     | 17.7      | 101.3                   | 20.6      |
| 172 | Metalaxyl               | 0.002 | 0.007 | 1.0000         | 31.8   | 77.0                     | 3.4       | 78.9                     | 3.5       | 76.6                    | 1.1       | 95.1                     | 10.4      | 89.9                     | 2.3       | 91.0                    | 11.5      |
| 173 | Methidathion            | 0.003 | 0.008 | 0.9999         | 53.0   | 75.1                     | 12.7      | 75.0                     | 14.6      | 77.7                    | 10.5      | 92.3                     | 8.4       | 85.0                     | 2.2       | 88.7                    | 17.0      |
| 174 | Methoprotryn            | 0.002 | 0.007 | 0.9999         | 63.0   | 77.9                     | 4.5       | 78.3                     | 3.9       | 76.9                    | 0.9       | 97.2                     | 10.8      | 96.0                     | 9.3       | 99.8                    | 12.9      |
| 175 | Methoxychlor            | 0.002 | 0.005 | 0.9989         | 50.6   | 84.0                     | 10.7      | 96.2                     | 3.3       | 88.5                    | 8.5       | 95.1                     | 1.9       | 98.0                     | 11.5      | 106.3                   | 15.8      |
| 176 | Methyl trithion         | 0.002 | 0.007 | 0.9999         | 37.8   | 65.3                     | 11.8      | 82.5                     | 3.7       | 74.7                    | 7.8       | 87.9                     | 15.4      | 82.3                     | 10.6      | 87.6                    | 20.8      |
| 177 | Metolachlor             | 0.002 | 0.007 | 0.9993         | 42.2   | 82.1                     | 3.1       | 84.1                     | 2.9       | 79.2                    | 0.8       | 98.1                     | 6.5       | 93.3                     | 2.3       | 93.5                    | 9.2       |
| 178 | Metribuzin              | 0.002 | 0.006 | 0.9998         | 45.8   | 79.4                     | 2.7       | 78.9                     | 3.4       | 75.7                    | 1.8       | 96.1                     | 7.9       | 88.9                     | 1.4       | 93.1                    | 15.0      |
| 179 | MGK-264                 | 0.002 | 0.007 | 0.9999         | 30.3   | 77.8                     | 3.3       | 80.3                     | 3.2       | 77.1                    | 1.5       | 91.2                     | 7.3       | 92.0                     | 4.2       | 93.3                    | 9.5       |
| 180 | Molinate                | 0.002 | 0.007 | 0.9970         | 17.3   | 81.3                     | 2.6       | 89.6                     | 4.1       | 81.1                    | 4.7       | 107.3                    | 20.3      | 92.5                     | 7.8       | 91.9                    | 4.4       |
| 181 | Monolinuron             | 0.002 | 0.007 | 0.9997         | 89.3   | 75.4                     | 11.8      | 82.3                     | 6.9       | 75.8                    | 5.7       | 92.7                     | 11.3      | 89.2                     | 2.8       | 91.3                    | 14.2      |
| 182 | Myclobutanil            | 0.002 | 0.005 | 1.0000         | 45.3   | 79.3                     | 3.1       | 79.7                     | 2.0       | 77.6                    | 0.5       | 101.0                    | 11.2      | 95.9                     | 6.8       | 96.8                    | 13.1      |
| 183 | Nitrothal-isopropyl     | 0.002 | 0.007 | 0.9995         | 59.7   | 85.8                     | 5.3       | 78.1                     | 3.5       | 82.7                    | 6.9       | 96.7                     | 5.7       | 86.5                     | 1.6       | 83.6                    | 6.4       |
| 184 | Nonachlor- <i>cis</i>   | 0.002 | 0.007 | 1.0000         | 7.1    | 93.5                     | 2.2       | 95.3                     | 2.4       | 90.2                    | 1.0       | 98.5                     | 4.9       | 97.6                     | 8.7       | 98.9                    | 1.3       |
|     | Nonachlor- <i>trans</i> | 0.002 | 0.006 | 0.9992         | 14.6   | 92.9                     | 4.4       | 98.1                     | 2.0       | 92.2                    | 0.9       | 93.4                     | 9.8       | 94.6                     | 13.3      | 94.6                    | 8.6       |

| No. | Analyte                 | LOD   | LOQ   | R <sup>2</sup> | ME.(%) | Repeatability (n=5)      |           |                          |           |                         |           | Reproducibility (n=11)   |           |                          |           |                         |           |
|-----|-------------------------|-------|-------|----------------|--------|--------------------------|-----------|--------------------------|-----------|-------------------------|-----------|--------------------------|-----------|--------------------------|-----------|-------------------------|-----------|
|     |                         |       |       |                |        | 0.01 mg kg <sup>-1</sup> |           | 0.02 mg kg <sup>-1</sup> |           | 0.1 mg kg <sup>-1</sup> |           | 0.01 mg kg <sup>-1</sup> |           | 0.02 mg kg <sup>-1</sup> |           | 0.1 mg kg <sup>-1</sup> |           |
|     |                         |       |       |                |        | Rec.<br>(%)              | CV<br>(%) | Rec.<br>(%)              | CV<br>(%) | Rec.<br>(%)             | CV<br>(%) | Rec.<br>(%)              | CV<br>(%) | Rec.<br>(%)              | CV<br>(%) | Rec.<br>(%)             | CV<br>(%) |
| 185 | Nuarimol                | 0.002 | 0.007 | 0.9999         | 109.5  | 64.0                     | 8.1       | 72.1                     | 5.0       | 72.4                    | 6.6       | 93.6                     | 21.6      | 89.2                     | 17.1      | 90.9                    | 22.9      |
| 186 | Ortho-phenyl phenol     | 0.003 | 0.008 | 0.9989         | 132.6  | 76.8                     | 2.1       | 81.4                     | 5.1       | 77.6                    | 2.4       | 101.5                    | 18.5      | 93.2                     | 4.6       | 91.2                    | 7.0       |
| 187 | Oxadiazon               | 0.002 | 0.007 | 0.9998         | 35.1   | 80.5                     | 3.8       | 82.8                     | 2.7       | 78.6                    | 0.7       | 96.9                     | 7.6       | 94.0                     | 2.0       | 93.9                    | 9.7       |
| 188 | Oxadixyl                | 0.002 | 0.007 | 0.9999         | 16.7   | 83.1                     | 3.9       | 81.9                     | 3.2       | 77.4                    | 1.1       | 100.6                    | 8.1       | 96.6                     | 5.1       | 97.9                    | 13.0      |
| 189 | Oxyfluorfen             | 0.002 | 0.005 | 0.9999         | 79.0   | 77.8                     | 8.9       | 77.9                     | 4.9       | 73.0                    | 1.3       | 95.0                     | 9.1       | 89.6                     | 3.3       | 86.9                    | 9.9       |
| 190 | Paclobutrazol           | 0.002 | 0.006 | 0.9990         | 150.8  | 102.5                    | 5.1       | 93.3                     | 2.8       | 73.6                    | 4.2       | 91.1                     | 28.7      | 88.5                     | 18.1      | 93.6                    | 25.2      |
| 191 | Parathion               | 0.002 | 0.007 | 0.9999         | 67.8   | 80.2                     | 7.4       | 75.9                     | 6.3       | 70.1                    | 1.1       | 98.0                     | 7.9       | 88.8                     | 5.4       | 85.2                    | 8.4       |
| 192 | Parathion-methyl        | 0.003 | 0.008 | 1.0000         | 38.4   | 68.4                     | 10.4      | 90.0                     | 4.1       | 85.2                    | 9.4       | 95.5                     | 18.7      | 88.7                     | 18.4      | 97.2                    | 24.3      |
| 193 | Penconazole             | 0.002 | 0.007 | 1.0000         | 35.3   | 78.4                     | 2.7       | 79.4                     | 3.0       | 76.2                    | 0.7       | 98.0                     | 9.7       | 94.1                     | 6.8       | 93.8                    | 12.1      |
| 194 | Pendimethalin           | 0.002 | 0.006 | 0.9996         | 58.3   | 81.6                     | 2.8       | 77.6                     | 2.8       | 73.9                    | 2.0       | 93.4                     | 4.2       | 86.4                     | 2.5       | 96.1                    | 17.0      |
| 195 | Penflufen               | 0.002 | 0.007 | 0.9998         | 90.6   | 69.3                     | 5.9       | 71.1                     | 3.8       | 72.0                    | 1.2       | 95.9                     | 18.8      | 92.3                     | 12.7      | 94.3                    | 18.2      |
| 196 | Pentachlorobenzonitrile | 0.002 | 0.007 | 0.9993         | 32.0   | 81.0                     | 3.6       | 85.5                     | 3.1       | 79.0                    | 2.5       | 95.2                     | 7.5       | 91.4                     | 11.2      | 89.6                    | 1.8       |
| 197 | Penthiopyrad            | 0.002 | 0.007 | 0.9991         | 117.1  | 68.1                     | 6.2       | 98.7                     | 2.8       | 72.9                    | 2.3       | 96.8                     | 19.8      | 91.7                     | 13.4      | 96.2                    | 20.4      |
| 198 | Pentoxazone             | 0.003 | 0.008 | 0.9998         | 50.9   | 80.2                     | 3.6       | 78.1                     | 3.8       | 76.9                    | 1.3       | 100.7                    | 11.6      | 96.3                     | 9.4       | 96.2                    | 15.2      |
| 199 | Permethrin-cis          | 0.002 | 0.007 | 0.9997         | 78.9   | 73.2                     | 19.9      | 74.1                     | 13.0      | 74.8                    | 7.6       | 95.2                     | 13.7      | 96.1                     | 12.6      | 95.3                    | 22.3      |
|     | Permethrin-trans        | 0.003 | 0.008 | 0.9992         | 77.6   | 70.6                     | 8.1       | 71.4                     | 1.5       | 78.8                    | 10.8      | 82.5                     | 27.6      | 92.4                     | 16.3      | 91.7                    | 25.2      |
| 200 | Perthane                | 0.002 | 0.006 | 1.0000         | 25.4   | 82.8                     | 2.7       | 85.0                     | 2.7       | 81.0                    | 0.5       | 95.1                     | 3.1       | 93.0                     | 1.8       | 93.1                    | 8.9       |
| 201 | Phenthoate              | 0.002 | 0.007 | 1.0000         | 35.3   | 77.3                     | 8.0       | 75.8                     | 6.3       | 72.2                    | 2.0       | 96.1                     | 9.2       | 90.4                     | 7.2       | 96.0                    | 20.4      |
| 202 | Phosphamidon (E)        | 0.002 | 0.007 | 0.9988         | 133.6  | 78.0                     | 28.4      | 95.5                     | 17.9      | 87.6                    | 14.9      | 98.9                     | 11.3      | 93.2                     | 19.8      | 98.8                    | 18.8      |
|     | Phosphamidon (Z)        | 0.002 | 0.007 | 0.9993         | 54.2   | 90.7                     | 14.0      | 92.5                     | 8.9       | 86.8                    | 13.3      | 103.1                    | 14.4      | 99.3                     | 13.9      | 85.1                    | 19.0      |
| 203 | Phosalone               | 0.003 | 0.008 | 1.0000         | 46.4   | 67.9                     | 8.2       | 95.7                     | 5.3       | 81.3                    | 13.6      | 90.9                     | 15.6      | 92.2                     | 15.0      | 89.3                    | 17.9      |
| 204 | Phosmet                 | 0.003 | 0.009 | 0.9999         | -19.0  | 78.4                     | 14.9      | 95.0                     | 6.3       | 85.5                    | 13.4      | 99.2                     | 12.7      | 96.5                     | 17.5      | 101.5                   | 22.9      |
| 205 | Picoxystrobin           | 0.002 | 0.007 | 0.9990         | 79.2   | 80.1                     | 4.6       | 81.8                     | 3.2       | 77.6                    | 0.8       | 100.1                    | 10.0      | 95.3                     | 4.3       | 94.7                    | 13.0      |

| No. | Analyte               | LOD   | LOQ   | R <sup>2</sup> | ME.(%) | Repeatability (n=5)      |           |                          |           |                         |           | Reproducibility (n=11)   |           |                          |           |                         |           |
|-----|-----------------------|-------|-------|----------------|--------|--------------------------|-----------|--------------------------|-----------|-------------------------|-----------|--------------------------|-----------|--------------------------|-----------|-------------------------|-----------|
|     |                       |       |       |                |        | 0.01 mg kg <sup>-1</sup> |           | 0.02 mg kg <sup>-1</sup> |           | 0.1 mg kg <sup>-1</sup> |           | 0.01 mg kg <sup>-1</sup> |           | 0.02 mg kg <sup>-1</sup> |           | 0.1 mg kg <sup>-1</sup> |           |
|     |                       |       |       |                |        | Rec.<br>(%)              | CV<br>(%) | Rec.<br>(%)              | CV<br>(%) | Rec.<br>(%)             | CV<br>(%) | Rec.<br>(%)              | CV<br>(%) | Rec.<br>(%)              | CV<br>(%) | Rec.<br>(%)             | CV<br>(%) |
| 206 | Piperonyl butoxide    | 0.002 | 0.007 | 0.9998         | 127.0  | 87.4                     | 4.8       | 81.7                     | 3.6       | 80.3                    | 1.9       | 104.8                    | 6.9       | 99.0                     | 7.3       | 101.1                   | 14.2      |
| 207 | Pirimicarb            | 0.002 | 0.007 | 0.9999         | 45.3   | 76.2                     | 3.6       | 78.8                     | 2.6       | 75.0                    | 2.1       | 94.7                     | 9.4       | 91.5                     | 6.5       | 92.2                    | 10.0      |
| 208 | Pirimiphos-ethyl      | 0.003 | 0.008 | 1.0000         | 38.2   | 80.5                     | 3.0       | 79.6                     | 3.4       | 76.8                    | 1.2       | 97.2                     | 7.1       | 90.3                     | 3.1       | 94.9                    | 10.0      |
| 209 | Pirimiphos-methyl     | 0.002 | 0.007 | 0.9999         | 40.8   | 75.5                     | 4.6       | 76.6                     | 4.3       | 74.2                    | 1.4       | 91.0                     | 9.6       | 90.5                     | 7.2       | 90.9                    | 11.2      |
| 210 | Pretilachlor          | 0.001 | 0.003 | 0.9997         | 49.0   | 85.6                     | 5.1       | 85.3                     | 5.4       | 78.7                    | 1.4       | 103.4                    | 7.1       | 94.9                     | 0.3       | 98.7                    | 10.1      |
| 211 | Prochloraz            | 0.002 | 0.007 | 0.9994         | 135.6  | 53.1                     | 11.0      | 51.1                     | 9.1       | 55.4                    | 2.5       | 82.3                     | 24.4      | 84.6                     | 29.0      | 102.3                   | 40.5      |
|     | 2,4,6-trichlorophenol | 0.002 | 0.007 | 0.9997         | 61.4   | 66.6                     | 3.3       | 73.3                     | 1.3       | 71.2                    | 2.6       | 75.4                     | 26.1      | 73.4                     | 28.2      | 67.0                    | 33.5      |
| 212 | Procymidone           | 0.002 | 0.007 | 1.0000         | 20.2   | 81.8                     | 3.7       | 83.4                     | 2.7       | 79.3                    | 0.4       | 98.6                     | 6.9       | 95.7                     | 5.1       | 94.5                    | 9.1       |
| 213 | Prodiamine            | 0.002 | 0.006 | 0.9996         | 49.3   | 82.0                     | 2.3       | 79.9                     | 3.5       | 76.8                    | 1.1       | 94.8                     | 5.1       | 89.9                     | 3.6       | 97.3                    | 16.8      |
| 214 | Profenofos            | 0.001 | 0.002 | 0.9987         | 97.4   | 68.2                     | 13.2      | 80.9                     | 3.5       | 75.4                    | 11.0      | 96.8                     | 18.9      | 90.2                     | 15.5      | 94.6                    | 22.4      |
| 215 | Profluralin           | 0.002 | 0.007 | 1.0000         | 35.1   | 88.6                     | 3.3       | 85.1                     | 3.0       | 79.3                    | 3.2       | 94.5                     | 6.3       | 91.4                     | 6.6       | 96.6                    | 10.4      |
| 216 | Prohydrojasmon        | 0.002 | 0.007 | 0.9999         | 58.0   | 73.2                     | 4.5       | 76.7                     | 1.9       | 76.5                    | 2.4       | 80.5                     | 25.0      | 83.1                     | 6.7       | 89.0                    | 12.0      |
| 217 | Prometon              | 0.003 | 0.008 | 0.9999         | 69.2   | 80.9                     | 2.7       | 85.1                     | 2.0       | 78.6                    | 1.1       | 93.9                     | 7.3       | 92.9                     | 6.6       | 93.0                    | 6.3       |
| 218 | Prometryn             | 0.002 | 0.007 | 0.9999         | 38.5   | 76.0                     | 3.0       | 78.6                     | 2.3       | 77.1                    | 0.9       | 95.9                     | 10.3      | 90.2                     | 5.0       | 90.8                    | 10.4      |
| 219 | Propachlor            | 0.003 | 0.008 | 0.9987         | 37.5   | 78.2                     | 6.6       | 83.9                     | 6.0       | 78.4                    | 3.0       | 96.3                     | 8.4       | 92.5                     | 6.2       | 92.5                    | 7.3       |
| 220 | Propanil              | 0.002 | 0.007 | 0.9997         | 76.5   | 80.6                     | 5.4       | 78.0                     | 3.4       | 75.8                    | 2.1       | 98.4                     | 8.7       | 90.2                     | 3.4       | 92.4                    | 12.3      |
| 221 | Propazine             | 0.002 | 0.006 | 0.9996         | 45.7   | 84.6                     | 3.4       | 86.2                     | 3.4       | 79.6                    | 1.7       | 98.2                     | 3.7       | 92.5                     | 6.9       | 92.6                    | 6.0       |
| 222 | Propetamphos          | 0.002 | 0.007 | 0.9999         | 59.3   | 81.4                     | 3.1       | 81.1                     | 2.7       | 76.7                    | 1.8       | 96.8                     | 6.6       | 90.4                     | 2.0       | 92.5                    | 12.1      |
| 223 | Propham               | 0.003 | 0.009 | 0.9978         | 84.0   | 76.5                     | 3.3       | 84.4                     | 3.2       | 79.3                    | 3.8       | 96.1                     | 10.0      | 93.4                     | 7.1       | 92.3                    | 5.0       |
| 224 | Propiconazole-1       | 0.002 | 0.007 | 1.0000         | 53.0   | 69.8                     | 5.5       | 72.7                     | 4.6       | 71.8                    | 1.8       | 91.9                     | 14.2      | 87.8                     | 13.1      | 90.9                    | 20.4      |
|     | Propiconazole-2       | 0.002 | 0.007 | 1.0000         | 67.4   | 78.6                     | 3.7       | 77.6                     | 4.3       | 74.8                    | 2.5       | 95.2                     | 8.4       | 90.1                     | 10.7      | 91.7                    | 19.5      |
| 225 | Propisochlor          | 0.003 | 0.009 | 0.9999         | 28.5   | 85.5                     | 4.2       | 85.3                     | 5.2       | 80.4                    | 1.4       | 100.0                    | 4.6       | 92.3                     | 3.1       | 93.3                    | 10.1      |
| 226 | Propyzamide           | 0.002 | 0.007 | 0.9999         | 53.6   | 80.5                     | 6.6       | 80.5                     | 5.9       | 76.8                    | 1.3       | 96.6                     | 6.4       | 90.9                     | 5.3       | 94.5                    | 10.3      |

| No. | Analyte                | LOD   | LOQ   | R <sup>2</sup> | ME.(%) | Repeatability (n=5)      |           |                          |           |                         |           | Reproducibility (n=11)   |           |                          |           |                         |           |
|-----|------------------------|-------|-------|----------------|--------|--------------------------|-----------|--------------------------|-----------|-------------------------|-----------|--------------------------|-----------|--------------------------|-----------|-------------------------|-----------|
|     |                        |       |       |                |        | 0.01 mg kg <sup>-1</sup> |           | 0.02 mg kg <sup>-1</sup> |           | 0.1 mg kg <sup>-1</sup> |           | 0.01 mg kg <sup>-1</sup> |           | 0.02 mg kg <sup>-1</sup> |           | 0.1 mg kg <sup>-1</sup> |           |
|     |                        |       |       |                |        | Rec.<br>(%)              | CV<br>(%) | Rec.<br>(%)              | CV<br>(%) | Rec.<br>(%)             | CV<br>(%) | Rec.<br>(%)              | CV<br>(%) | Rec.<br>(%)              | CV<br>(%) | Rec.<br>(%)             | CV<br>(%) |
| 227 | Prothiofos             | 0.001 | 0.002 | 0.9996         | 59.4   | 77.3                     | 4.2       | 78.5                     | 3.5       | 75.6                    | 1.1       | 94.9                     | 8.9       | 92.4                     | 8.3       | 90.7                    | 7.5       |
| 228 | Pyracarbolid           | 0.002 | 0.006 | 0.9999         | 79.7   | 79.3                     | 3.7       | 75.1                     | 2.3       | 73.0                    | 1.4       | 98.3                     | 11.0      | 88.2                     | 6.8       | 92.4                    | 17.2      |
| 229 | Pyraclufos             | 0.003 | 0.008 | 0.9985         | 86.8   | 80.1                     | 8.4       | 94.5                     | 9.8       | 85.7                    | 17.1      | 91.7                     | 29.7      | 89.9                     | 15.6      | 79.3                    | 5.2       |
| 230 | Pyraflufen-ethyl       | 0.003 | 0.008 | 1.0000         | 74.6   | 63.2                     | 2.0       | 70.8                     | 12.0      | 72.7                    | 3.8       | 85.1                     | 28.8      | 81.8                     | 20.3      | 92.1                    | 23.4      |
| 231 | Pyrazophos             | 0.003 | 0.008 | 0.9994         | 35.8   | 66.0                     | 11.4      | 98.2                     | 4.5       | 77.1                    | 9.8       | 94.3                     | 19.7      | 93.3                     | 19.7      | 88.0                    | 17.1      |
| 232 | Pyridalyl              | 0.003 | 0.008 | 0.9998         | 100.1  | 69.8                     | 4.9       | 98.3                     | 3.8       | 82.1                    | 7.0       | 94.5                     | 15.6      | 94.9                     | 16.7      | 97.4                    | 22.5      |
| 233 | Pyrifenox              | 0.002 | 0.007 | 0.9999         | 45.2   | 76.5                     | 5.0       | 77.9                     | 3.9       | 77.7                    | 0.4       | 95.8                     | 14.0      | 90.0                     | 4.8       | 93.6                    | 16.9      |
| 234 | Pyriftalid             | 0.003 | 0.008 | 0.9992         | 96.5   | 78.3                     | 5.8       | 72.7                     | 9.2       | 71.8                    | 3.3       | 100.8                    | 13.8      | 93.3                     | 14.7      | 83.5                    | 3.9       |
| 235 | Pyrimethanil           | 0.002 | 0.006 | 0.9994         | 47.7   | 80.5                     | 3.2       | 83.0                     | 5.0       | 79.5                    | 2.0       | 98.2                     | 8.5       | 94.8                     | 10.8      | 96.5                    | 7.9       |
| 236 | Pyriminobac-methyl (E) | 0.003 | 0.008 | 0.9998         | 64.1   | 79.6                     | 5.8       | 80.0                     | 4.2       | 79.4                    | 0.7       | 100.2                    | 10.5      | 95.4                     | 5.9       | 89.5                    | 3.9       |
|     | Pyriminobac-methyl (Z) | 0.002 | 0.007 | 0.9999         | 36.8   | 80.3                     | 4.1       | 82.0                     | 3.7       | 79.6                    | 0.5       | 100.9                    | 10.2      | 97.8                     | 7.0       | 91.1                    | 5.4       |
| 237 | Quinalphos             | 0.002 | 0.007 | 1.0000         | 33.1   | 75.5                     | 6.7       | 74.8                     | 6.2       | 71.6                    | 1.3       | 94.7                     | 10.1      | 88.2                     | 5.3       | 90.6                    | 15.9      |
| 238 | Quinoxifen             | 0.002 | 0.007 | 1.0000         | 22.3   | 77.5                     | 2.8       | 79.7                     | 2.2       | 76.3                    | 0.9       | 97.7                     | 11.2      | 93.5                     | 5.6       | 93.1                    | 8.0       |
| 239 | Quintozene             | 0.002 | 0.007 | 0.9996         | 34.1   | 88.1                     | 3.2       | 87.2                     | 5.5       | 74.5                    | 4.6       | 87.4                     | 10.8      | 85.0                     | 14.4      | 80.5                    | 4.9       |
| 240 | Quizalofop-ethyl       | 0.003 | 0.008 | 0.9993         | 96.9   | 59.6                     | 7.4       | 59.3                     | 5.8       | 60.0                    | 3.7       | 44.2                     | 58.2      | 39.0                     | 88.2      | 54.3                    | 34.2      |
| 241 | Silafluofen            | 0.003 | 0.008 | 0.9993         | 73.6   | 76.9                     | 4.7       | 73.2                     | 2.7       | 70.6                    | 2.2       | 95.1                     | 9.1       | 93.7                     | 12.5      | 90.3                    | 13.7      |
| 242 | Simeconazole           | 0.002 | 0.007 | 0.9998         | 70.2   | 71.8                     | 3.4       | 72.9                     | 2.9       | 73.3                    | 1.2       | 94.8                     | 15.4      | 87.9                     | 7.4       | 93.8                    | 16.2      |
| 243 | Simetryn               | 0.002 | 0.007 | 1.0000         | 48.0   | 81.2                     | 2.7       | 80.3                     | 2.9       | 77.8                    | 1.6       | 96.4                     | 7.2       | 87.6                     | 2.6       | 90.2                    | 11.7      |
| 244 | Spiromesifen           | 0.002 | 0.005 | 1.0000         | 35.0   | 76.5                     | 12.0      | 71.4                     | 10.7      | 74.1                    | 7.3       | 96.8                     | 13.2      | 93.6                     | 13.2      | 91.4                    | 20.6      |
| 245 | Spiroxamine-1          | 0.003 | 0.009 | 0.9999         | 74.9   | 67.6                     | 4.2       | 72.9                     | 1.8       | 71.9                    | 3.0       | 93.2                     | 21.6      | 85.6                     | 11.3      | 87.8                    | 13.1      |
|     | Spiroxamine-2          | 0.003 | 0.008 | 0.9998         | 56.8   | 76.8                     | 2.5       | 78.9                     | 2.3       | 76.0                    | 2.2       | 98.3                     | 15.4      | 87.5                     | 10.6      | 89.0                    | 11.6      |
| 246 | Sulfotep               | 0.003 | 0.008 | 0.9992         | 40.4   | 77.0                     | 3.1       | 81.9                     | 3.8       | 77.8                    | 2.5       | 95.2                     | 8.8       | 92.4                     | 7.6       | 92.6                    | 8.4       |
| 247 | Tebuconazole           | 0.002 | 0.007 | 1.0000         | 166.5  | 86.7                     | 6.9       | 74.6                     | 2.4       | 77.3                    | 6.4       | 95.1                     | 29.3      | 94.0                     | 22.2      | 85.2                    | 18.0      |

| No. | Analyte           | LOD   | LOQ   | R <sup>2</sup> | ME.(%) | Repeatability (n=5)      |           |                          |           |                         |           | Reproducibility (n=11)   |           |                          |           |                         |           |
|-----|-------------------|-------|-------|----------------|--------|--------------------------|-----------|--------------------------|-----------|-------------------------|-----------|--------------------------|-----------|--------------------------|-----------|-------------------------|-----------|
|     |                   |       |       |                |        | 0.01 mg kg <sup>-1</sup> |           | 0.02 mg kg <sup>-1</sup> |           | 0.1 mg kg <sup>-1</sup> |           | 0.01 mg kg <sup>-1</sup> |           | 0.02 mg kg <sup>-1</sup> |           | 0.1 mg kg <sup>-1</sup> |           |
|     |                   |       |       |                |        | Rec.<br>(%)              | CV<br>(%) | Rec.<br>(%)              | CV<br>(%) | Rec.<br>(%)             | CV<br>(%) | Rec.<br>(%)              | CV<br>(%) | Rec.<br>(%)              | CV<br>(%) | Rec.<br>(%)             | CV<br>(%) |
| 248 | Tebufenpyrad      | 0.003 | 0.008 | 0.9995         | 65.3   | 77.5                     | 5.0       | 73.7                     | 3.2       | 73.9                    | 0.9       | 97.2                     | 12.1      | 94.6                     | 11.7      | 94.6                    | 15.9      |
| 249 | Tebupirimfos      | 0.003 | 0.008 | 0.9998         | 33.5   | 72.6                     | 2.0       | 79.1                     | 3.4       | 77.6                    | 2.5       | 91.8                     | 10.6      | 89.7                     | 4.8       | 91.4                    | 8.8       |
| 250 | Tecnazene         | 0.003 | 0.008 | 0.9990         | 33.7   | 82.6                     | 2.8       | 85.0                     | 4.2       | 78.2                    | 4.4       | 91.1                     | 2.1       | 88.1                     | 8.7       | 89.7                    | 5.3       |
| 251 | Tefluthrin        | 0.002 | 0.007 | 0.9998         | 22.7   | 80.4                     | 2.0       | 85.3                     | 2.4       | 81.4                    | 2.1       | 94.1                     | 4.4       | 90.8                     | 5.2       | 91.7                    | 6.0       |
| 252 | Terbacil          | 0.003 | 0.008 | 0.9999         | 115.4  | 70.0                     | 8.1       | 73.9                     | 4.5       | 71.1                    | 1.1       | 99.5                     | 19.2      | 91.4                     | 10.1      | 97.3                    | 16.4      |
| 253 | Terbumeton        | 0.002 | 0.007 | 0.9995         | 53.1   | 83.0                     | 3.1       | 85.7                     | 3.0       | 80.0                    | 0.8       | 93.1                     | 14.5      | 88.6                     | 8.1       | 92.7                    | 5.5       |
| 254 | Terbutryn         | 0.002 | 0.006 | 1.0000         | 42.3   | 80.7                     | 3.0       | 81.2                     | 2.7       | 79.0                    | 0.9       | 96.5                     | 7.8       | 90.6                     | 0.4       | 92.5                    | 9.1       |
| 255 | Tetrachlorvinphos | 0.002 | 0.007 | 0.9999         | 51.2   | 74.5                     | 13.2      | 88.0                     | 5.7       | 82.8                    | 13.2      | 98.7                     | 14.5      | 95.9                     | 7.2       | 94.1                    | 22.5      |
| 256 | Tetraconazole     | 0.002 | 0.007 | 1.0000         | 44.6   | 82.2                     | 4.0       | 80.6                     | 3.0       | 78.1                    | 0.5       | 101.4                    | 9.2       | 94.3                     | 5.0       | 95.5                    | 13.2      |
| 257 | Tetradifon        | 0.002 | 0.007 | 1.0000         | 20.0   | 83.6                     | 3.0       | 83.1                     | 1.7       | 78.2                    | 0.7       | 98.8                     | 5.6       | 97.2                     | 4.3       | 95.6                    | 9.5       |
| 258 | Tetramethrin-1    | 0.003 | 0.008 | 0.9998         | 116.1  | 63.7                     | 17.4      | 87.2                     | 2.2       | 73.3                    | 7.9       | 108.3                    | 34.8      | 87.1                     | 17.0      | 92.2                    | 27.4      |
|     | Tetramethrin-2    | 0.003 | 0.009 | 0.9998         | 82.9   | 66.3                     | 17.2      | 78.0                     | 6.3       | 62.0                    | 1.2       | 95.2                     | 2.7       | 103.1                    | 9.6       | 116.0                   | 0.0       |
| 259 | Thifluzamide      | 0.002 | 0.007 | 1.0000         | 157.2  | 70.2                     | 5.8       | 73.8                     | 3.3       | 72.9                    | 1.3       | 96.4                     | 17.6      | 93.4                     | 10.6      | 97.7                    | 20.6      |
| 260 | Thiometon         | 0.003 | 0.008 | 0.9988         | 56.1   | 75.8                     | 5.0       | 77.7                     | 5.3       | 73.3                    | 2.9       | 89.9                     | 11.9      | 84.1                     | 4.8       | 86.5                    | 15.5      |
| 261 | Thionazin         | 0.003 | 0.008 | 0.9991         | 44.6   | 79.2                     | 3.1       | 82.8                     | 4.3       | 76.6                    | 2.6       | 96.5                     | 7.7       | 91.3                     | 5.6       | 90.7                    | 8.5       |
| 262 | Tolclofos-methyl  | 0.002 | 0.007 | 0.9997         | 28.7   | 76.7                     | 4.7       | 80.2                     | 3.8       | 76.7                    | 1.2       | 94.2                     | 8.3       | 91.2                     | 5.6       | 90.5                    | 8.5       |
| 263 | Triadimefon       | 0.002 | 0.007 | 1.0000         | 41.6   | 83.6                     | 2.9       | 81.8                     | 2.3       | 78.9                    | 0.8       | 99.1                     | 7.1       | 90.3                     | 3.5       | 92.0                    | 14.2      |
| 264 | Triadimenol       | 0.002 | 0.006 | 0.9999         | 86.6   | 69.7                     | 5.8       | 74.9                     | 4.1       | 71.4                    | 1.7       | 93.0                     | 17.9      | 89.7                     | 11.7      | 81.5                    | 14.1      |
| 265 | Tri-allate        | 0.002 | 0.007 | 0.9994         | 26.8   | 79.7                     | 3.8       | 85.6                     | 1.8       | 81.1                    | 3.5       | 93.0                     | 4.1       | 90.2                     | 6.8       | 89.7                    | 7.4       |
| 266 | Triazophos        | 0.003 | 0.008 | 1.0000         | 61.9   | 73.6                     | 14.9      | 73.6                     | 11.3      | 70.2                    | 3.2       | 97.8                     | 14.2      | 85.5                     | 10.4      | 98.0                    | 21.2      |
| 267 | Tridiphane        | 0.002 | 0.005 | 0.9999         | 29.3   | 76.0                     | 10.0      | 96.2                     | 14.5      | 107.6                   | 6.7       | 92.1                     | 7.7       | 93.0                     | 14.0      | 106.4                   | 12.0      |
| 268 | Trifloxystrobin   | 0.002 | 0.006 | 0.9998         | 49.7   | 82.5                     | 4.6       | 81.1                     | 3.6       | 79.0                    | 1.0       | 100.8                    | 8.4       | 93.7                     | 4.9       | 97.1                    | 17.8      |
| 269 | Triflumizole      | 0.002 | 0.006 | 1.0000         | 50.4   | 76.0                     | 4.5       | 77.8                     | 4.1       | 73.3                    | 2.5       | 99.1                     | 13.0      | 94.0                     | 8.0       | 95.4                    | 14.8      |

| No. | Analyte     | LOD   | LOQ   | R <sup>2</sup> | ME.(%) | Repeatability (n=5)      |           |                          |           |                         |           | Reproducibility (n=11)   |           |                          |           |                         |           |
|-----|-------------|-------|-------|----------------|--------|--------------------------|-----------|--------------------------|-----------|-------------------------|-----------|--------------------------|-----------|--------------------------|-----------|-------------------------|-----------|
|     |             |       |       |                |        | 0.01 mg kg <sup>-1</sup> |           | 0.02 mg kg <sup>-1</sup> |           | 0.1 mg kg <sup>-1</sup> |           | 0.01 mg kg <sup>-1</sup> |           | 0.02 mg kg <sup>-1</sup> |           | 0.1 mg kg <sup>-1</sup> |           |
|     |             |       |       |                |        | Rec.<br>(%)              | CV<br>(%) | Rec.<br>(%)              | CV<br>(%) | Rec.<br>(%)             | CV<br>(%) | Rec.<br>(%)              | CV<br>(%) | Rec.<br>(%)              | CV<br>(%) | Rec.<br>(%)             | CV<br>(%) |
| 270 | Trifluralin | 0.002 | 0.007 | 0.9998         | 51.9   | 82.2                     | 2.3       | 84.0                     | 3.5       | 78.9                    | 3.0       | 93.2                     | 4.2       | 89.1                     | 6.9       | 93.7                    | 13.4      |
| 271 | Vinclozolin | 0.002 | 0.007 | 0.9996         | 22.3   | 77.8                     | 3.8       | 81.4                     | 3.7       | 75.9                    | 3.1       | 90.4                     | 10.7      | 91.2                     | 5.1       | 92.4                    | 8.9       |
| 272 | Zoxamide    | 0.003 | 0.008 | 0.9983         | 78.6   | 70.3                     | 11.4      | 87.5                     | 6.0       | 83.4                    | 16.4      | 92.4                     | 14.2      | 91.9                     | 21.6      | 96.1                    | 23.3      |

Table S5. Method validation parameter of 272 pesticides in mandarin.

| No. | Analyte           | LOD   | LOQ   | R <sup>2</sup> | ME.(%) | Repeatability (n=5)      |           |                          |           |                         |           | Reproducibility (n=11)   |           |                          |           |                         |           |
|-----|-------------------|-------|-------|----------------|--------|--------------------------|-----------|--------------------------|-----------|-------------------------|-----------|--------------------------|-----------|--------------------------|-----------|-------------------------|-----------|
|     |                   |       |       |                |        | 0.01 mg kg <sup>-1</sup> |           | 0.02 mg kg <sup>-1</sup> |           | 0.1 mg kg <sup>-1</sup> |           | 0.01 mg kg <sup>-1</sup> |           | 0.02 mg kg <sup>-1</sup> |           | 0.1 mg kg <sup>-1</sup> |           |
|     |                   |       |       |                |        | Rec.<br>(%)              | CV<br>(%) | Rec.<br>(%)              | CV<br>(%) | Rec.<br>(%)             | CV<br>(%) | Rec.<br>(%)              | CV<br>(%) | Rec.<br>(%)              | CV<br>(%) | Rec.<br>(%)             | CV<br>(%) |
| 1   | 2,6-DIPN          | 0.002 | 0.006 | 0.9954         | 119.0  | 113.5                    | 11.7      | 102.8                    | 6.0       | 103.7                   | 8.9       | 130.8                    | 15.3      | 120.2                    | 0.2       | 95.6                    | 6.3       |
| 2   | Acetochlor        | 0.001 | 0.003 | 0.9983         | 97.0   | 106.5                    | 5.1       | 107.4                    | 0.6       | 104.8                   | 5.4       | 96.6                     | 11.5      | 88.5                     | 18.2      | 89.4                    | 15.8      |
|     | EMA               | 0.001 | 0.003 | 0.9988         | 52.8   | 100.9                    | 8.4       | 79.5                     | 13.3      | 117.9                   | 8.4       | 89.9                     | 3.5       | 98.5                     | 8.7       | 98.1                    | 11.3      |
|     | HEMA              | 0.001 | 0.003 | 0.9985         | >500   | 30.4                     | 10.2      | 41.0                     | 12.9      | 41.7                    | 7.7       | 49.8                     | 73.7      | 57.6                     | 71.9      | 45.7                    | 25.7      |
| 3   | Acrinathrin       | 0.002 | 0.005 | 0.9990         | >500   | 91.6                     | 5.0       | 90.2                     | 3.9       | 72.9                    | 4.9       | 110.7                    | 13.8      | 101.5                    | 20.5      | 123.9                   | 22.0      |
| 4   | Alachlor          | 0.001 | 0.004 | 0.9988         | 92.9   | 107.4                    | 5.1       | 116.6                    | 2.4       | 110.1                   | 3.7       | 92.7                     | 11.0      | 91.1                     | 18.6      | 87.8                    | 14.2      |
| 5   | Aldrin            | 0.001 | 0.003 | 0.9984         | 72.3   | 105.5                    | 3.1       | 97.4                     | 3.1       | 95.9                    | 4.8       | 95.5                     | 8.3       | 87.3                     | 9.6       | 88.4                    | 5.1       |
|     | Dieldrin          | 0.001 | 0.002 | 0.9996         | 48.1   | 114.6                    | 1.9       | 112.4                    | 1.8       | 117.0                   | 2.9       | 95.5                     | 8.3       | 92.3                     | 11.3      | 89.6                    | 8.3       |
| 6   | Allidochlor       | 0.001 | 0.003 | 0.9990         | 95.1   | 99.3                     | 6.8       | 99.0                     | 3.2       | 115.7                   | 7.7       | 95.7                     | 13.4      | 94.3                     | 7.4       | 96.3                    | 5.7       |
| 7   | Ametryn           | 0.001 | 0.002 | 0.9991         | 147.6  | 110.2                    | 2.2       | 105.0                    | 2.1       | 96.2                    | 4.0       | 92.8                     | 1.1       | 89.5                     | 8.4       | 86.8                    | 12.5      |
| 8   | Anilofos          | 0.001 | 0.004 | 0.9991         | 334.9  | 106.4                    | 5.6       | 92.2                     | 5.2       | 80.2                    | 2.0       | 96.7                     | 8.5       | 91.9                     | 11.8      | 91.9                    | 7.0       |
| 9   | Aramite           | 0.001 | 0.002 | 0.9998         | 176.7  | 111.8                    | 2.7       | 106.0                    | 3.4       | 77.9                    | 3.7       | 95.8                     | 14.3      | 91.7                     | 20.7      | 90.3                    | 10.3      |
| 10  | Aspon             | 0.001 | 0.002 | 0.9990         | 138.3  | 107.5                    | 4.9       | 108.1                    | 2.8       | 98.8                    | 4.7       | 92.1                     | 13.2      | 94.4                     | 12.5      | 92.3                    | 6.1       |
| 11  | Atrazine          | 0.001 | 0.002 | 0.9988         | 134.9  | 108.5                    | 5.9       | 101.3                    | 2.5       | 95.3                    | 4.6       | 92.0                     | 19.0      | 91.0                     | 13.2      | 91.0                    | 3.4       |
| 12  | Azaconazole       | 0.001 | 0.002 | 0.9999         | 94.9   | 117.6                    | 3.0       | 107.5                    | 2.5       | 97.5                    | 3.1       | 94.1                     | 2.5       | 93.3                     | 9.5       | 91.0                    | 6.6       |
| 13  | Benfluralin       | 0.001 | 0.004 | 0.9976         | 150.6  | 106.2                    | 4.5       | 108.9                    | 1.8       | 111.7                   | 5.2       | 97.2                     | 8.5       | 91.7                     | 9.6       | 92.2                    | 7.1       |
| 14  | Benfuresate       | 0.001 | 0.002 | 0.9985         | 72.5   | 108.3                    | 1.8       | 103.5                    | 3.1       | 99.4                    | 4.9       | 91.0                     | 8.7       | 88.5                     | 17.0      | 92.6                    | 3.6       |
| 15  | Benodanil         | 0.001 | 0.003 | 0.9999         | 247.8  | 61.7                     | 0.5       | 101.6                    | 2.6       | 73.6                    | 2.2       | 101.9                    | 2.3       | 96.0                     | 11.4      | 93.3                    | 5.9       |
| 16  | Benzoylprop-ethyl | 0.001 | 0.002 | 0.9999         | 111.1  | 102.9                    | 2.2       | 100.1                    | 2.8       | 85.6                    | 2.1       | 99.6                     | 1.5       | 97.6                     | 6.0       | 93.0                    | 4.3       |
| 17  | BHC, $\alpha$ -   | 0.001 | 0.003 | 0.9999         | 58.0   | 103.6                    | 7.8       | 100.2                    | 3.3       | 100.3                   | 5.1       | 94.5                     | 18.2      | 96.3                     | 13.4      | 97.8                    | 8.1       |
|     | BHC, $\beta$ -    | 0.001 | 0.003 | 0.9982         | 47.6   | 113.6                    | 2.0       | 97.6                     | 3.7       | 98.5                    | 1.8       | 83.9                     | 14.6      | 90.3                     | 7.9       | 102.4                   | 13.8      |

| No. | Analyte               | LOD   | LOQ   | R <sup>2</sup> | ME.(%) | Repeatability (n=5)      |           |                          |           |                         |           | Reproducibility (n=11)   |           |                          |           |                         |           |
|-----|-----------------------|-------|-------|----------------|--------|--------------------------|-----------|--------------------------|-----------|-------------------------|-----------|--------------------------|-----------|--------------------------|-----------|-------------------------|-----------|
|     |                       |       |       |                |        | 0.01 mg kg <sup>-1</sup> |           | 0.02 mg kg <sup>-1</sup> |           | 0.1 mg kg <sup>-1</sup> |           | 0.01 mg kg <sup>-1</sup> |           | 0.02 mg kg <sup>-1</sup> |           | 0.1 mg kg <sup>-1</sup> |           |
|     |                       |       |       |                |        | Rec.<br>(%)              | CV<br>(%) | Rec.<br>(%)              | CV<br>(%) | Rec.<br>(%)             | CV<br>(%) | Rec.<br>(%)              | CV<br>(%) | Rec.<br>(%)              | CV<br>(%) | Rec.<br>(%)             | CV<br>(%) |
|     | BHC, $\delta$ -       | 0.001 | 0.003 | 0.9993         | 56.4   | 83.6                     | 6.8       | 78.8                     | 7.8       | 74.5                    | 6.8       | 77.5                     | 13.3      | 100.4                    | 17.7      | 100.6                   | 13.4      |
| 18  | BHC, $\gamma$ -       | 0.001 | 0.002 | 0.9973         | 54.9   | 109.5                    | 3.6       | 89.4                     | 1.5       | 100.6                   | 4.5       | 95.4                     | 14.0      | 90.0                     | 20.0      | 86.9                    | 14.9      |
| 19  | Bifenox               | 0.001 | 0.004 | 0.9987         | 338.8  | 120.9                    | 2.4       | 102.3                    | 5.1       | 93.0                    | 2.9       | 117.0                    | 19.2      | 111.8                    | 18.7      | 107.4                   | 17.6      |
| 20  | Bifenthrin            | 0.001 | 0.003 | 0.9999         | 210.9  | 113.5                    | 2.8       | 99.9                     | 3.4       | 88.3                    | 2.2       | 96.8                     | 5.3       | 95.2                     | 11.7      | 92.7                    | 5.3       |
| 21  | Boscalid              | 0.001 | 0.003 | 0.9998         | 478.4  | 118.4                    | 3.7       | 101.2                    | 1.1       | 85.0                    | 1.9       | 101.2                    | 6.4       | 93.7                     | 16.4      | 94.4                    | 4.7       |
| 22  | Bromobutide           | 0.001 | 0.003 | 0.9967         | 71.7   | 104.3                    | 11.7      | 99.0                     | 2.4       | 101.7                   | 5.6       | 100.4                    | 7.6       | 90.3                     | 9.7       | 93.3                    | 6.2       |
| 23  | Bromophos-methyl      | 0.001 | 0.003 | 0.9988         | 137.8  | 110.5                    | 4.5       | 101.2                    | 1.5       | 90.6                    | 3.3       | 96.3                     | 13.2      | 94.0                     | 14.8      | 87.0                    | 13.4      |
| 24  | Bromophos-ethyl       | 0.001 | 0.003 | 0.9993         | 116.7  | 109.8                    | 5.8       | 105.8                    | 4.7       | 92.8                    | 3.5       | 92.0                     | 7.0       | 92.7                     | 15.8      | 88.0                    | 8.0       |
| 25  | Bromopropylate        | 0.001 | 0.003 | 0.9998         | 362.5  | 119.6                    | 2.7       | 101.7                    | 2.5       | 83.3                    | 2.9       | 98.8                     | 2.7       | 97.1                     | 8.2       | 93.1                    | 3.5       |
| 26  | Bupirimate            | 0.001 | 0.002 | 0.9995         | 139.9  | 87.2                     | 4.5       | 100.6                    | 7.8       | 91.4                    | 3.5       | 96.1                     | 6.9       | 91.8                     | 13.5      | 90.4                    | 7.2       |
| 27  | Buprofezin            | 0.001 | 0.004 | 0.9993         | 93.6   | 107.5                    | 0.8       | 99.2                     | 5.1       | 92.3                    | 2.3       | 95.9                     | 5.2       | 95.3                     | 12.3      | 89.7                    | 6.5       |
| 28  | Butachlor             | 0.002 | 0.006 | 0.9988         | 130.0  | 112.9                    | 3.3       | 108.8                    | 2.9       | 97.5                    | 3.5       | 100.6                    | 8.5       | 96.6                     | 14.6      | 92.6                    | 6.9       |
| 29  | Butafenacil           | 0.001 | 0.004 | 0.9994         | >500   | 117.0                    | 4.1       | 94.0                     | 1.5       | 79.4                    | 3.0       | 101.2                    | 1.7       | 96.3                     | 10.3      | 100.3                   | 6.7       |
| 30  | Butralin              | 0.001 | 0.003 | 0.9959         | 162.4  | 112.7                    | 6.2       | 118.5                    | 1.4       | 99.5                    | 4.9       | 101.6                    | 6.6       | 94.7                     | 12.3      | 98.9                    | 2.8       |
| 31  | Butylate              | 0.001 | 0.003 | 0.9974         | 101.3  | 110.6                    | 7.9       | 93.9                     | 6.5       | 115.8                   | 9.6       | 93.8                     | 4.1       | 95.8                     | 3.4       | 94.7                    | 3.7       |
| 32  | Cadusafos             | 0.001 | 0.003 | 0.9985         | 202.0  | 106.4                    | 6.0       | 109.7                    | 0.5       | 109.7                   | 5.1       | 92.4                     | 5.0       | 89.3                     | 15.5      | 94.7                    | 1.7       |
| 33  | Carbophenothion       | 0.001 | 0.003 | 0.9995         | 218.1  | 114.5                    | 4.1       | 99.1                     | 2.0       | 76.2                    | 2.9       | 97.1                     | 10.8      | 94.4                     | 17.4      | 91.7                    | 6.8       |
| 34  | Carboxin              | 0.001 | 0.003 | 0.9998         | 185.8  | 119.1                    | 4.2       | 100.6                    | 6.0       | 89.3                    | 3.4       | 97.1                     | 3.4       | 93.8                     | 14.0      | 89.3                    | 11.6      |
| 35  | Carfentrazone-ethyl   | 0.001 | 0.004 | 0.9991         | 178.4  | 116.6                    | 4.0       | 102.0                    | 2.8       | 79.2                    | 3.2       | 123.6                    | 33.5      | 125.6                    | 37.1      | 114.0                   | 33.9      |
| 36  | Chinomethionat        | 0.001 | 0.003 | 0.9996         | 91.7   | 76.0                     | 7.4       | 64.8                     | 2.0       | 70.3                    | 2.7       | 109.1                    | 13.8      | 106.7                    | 17.0      | 102.3                   | 11.7      |
| 37  | Chlorbenside          | 0.001 | 0.002 | 0.9995         | 99.4   | 108.2                    | 2.1       | 102.4                    | 4.2       | 92.3                    | 2.3       | 94.8                     | 4.7       | 91.5                     | 10.9      | 86.9                    | 7.6       |
| 38  | Chlorbufam            | 0.001 | 0.004 | 0.9989         | 308.8  | 104.5                    | 1.7       | 115.2                    | 3.6       | 106.1                   | 4.1       | 103.9                    | 15.1      | 99.8                     | 12.3      | 94.0                    | 12.2      |
| 39  | Chlordane- <i>cis</i> | 0.001 | 0.002 | 0.9992         | 63.1   | 113.9                    | 4.3       | 99.0                     | 5.4       | 93.8                    | 3.0       | 93.7                     | 8.5       | 93.7                     | 13.6      | 89.7                    | 7.4       |

| No. | Analyte                 | LOD   | LOQ   | R <sup>2</sup> | ME.(%) | Repeatability (n=5)      |           |                          |           |                         |           | Reproducibility (n=11)   |           |                          |           |                         |           |
|-----|-------------------------|-------|-------|----------------|--------|--------------------------|-----------|--------------------------|-----------|-------------------------|-----------|--------------------------|-----------|--------------------------|-----------|-------------------------|-----------|
|     |                         |       |       |                |        | 0.01 mg kg <sup>-1</sup> |           | 0.02 mg kg <sup>-1</sup> |           | 0.1 mg kg <sup>-1</sup> |           | 0.01 mg kg <sup>-1</sup> |           | 0.02 mg kg <sup>-1</sup> |           | 0.1 mg kg <sup>-1</sup> |           |
|     |                         |       |       |                |        | Rec.<br>(%)              | CV<br>(%) | Rec.<br>(%)              | CV<br>(%) | Rec.<br>(%)             | CV<br>(%) | Rec.<br>(%)              | CV<br>(%) | Rec.<br>(%)              | CV<br>(%) | Rec.<br>(%)             | CV<br>(%) |
|     | Chlordane- <i>trans</i> | 0.001 | 0.002 | 0.9991         | 53.0   | 111.6                    | 4.2       | 102.4                    | 2.8       | 95.4                    | 3.1       | 96.7                     | 8.8       | 93.2                     | 13.8      | 90.2                    | 7.9       |
| 40  | Chlorethoxyfos          | 0.002 | 0.005 | 0.9987         | 68.9   | 106.1                    | 7.4       | 104.2                    | 4.6       | 108.0                   | 6.6       | 88.9                     | 10.6      | 98.2                     | 23.4      | 97.3                    | 23.8      |
| 41  | Chlorfenapyr            | 0.001 | 0.002 | 0.9997         | 135.8  | 115.8                    | 0.5       | 103.5                    | 4.4       | 91.6                    | 3.3       | 102.1                    | 13.8      | 98.4                     | 14.2      | 93.8                    | 12.7      |
| 42  | Chlorfenson             | 0.001 | 0.002 | 0.9999         | 98.5   | 89.0                     | 6.4       | 105.1                    | 3.7       | 108.4                   | 0.5       | 100.2                    | 16.0      | 95.1                     | 18.2      | 89.4                    | 14.1      |
| 43  | Chlorflurenol-methyl    | 0.001 | 0.002 | 0.9999         | 268.7  | 113.3                    | 4.7       | 103.1                    | 4.9       | 87.4                    | 4.9       | 96.6                     | 5.0       | 93.8                     | 13.3      | 91.5                    | 8.6       |
| 44  | Chlornitrofen           | 0.001 | 0.003 | 0.9989         | 178.0  | 116.4                    | 2.6       | 101.6                    | 6.3       | 81.7                    | 2.7       | 105.2                    | 8.5       | 100.9                    | 12.8      | 98.9                    | 3.1       |
| 45  | Chlorobenzilate         | 0.001 | 0.002 | 0.9997         | 148.9  | 117.5                    | 1.7       | 108.8                    | 3.4       | 96.6                    | 3.2       | 97.5                     | 1.9       | 94.9                     | 9.6       | 91.8                    | 4.7       |
| 46  | Chloropropylate         | 0.001 | 0.002 | 0.9994         | 145.2  | 103.4                    | 6.9       | 84.9                     | 2.9       | 105.1                   | 6.0       | 96.8                     | 2.6       | 94.8                     | 9.7       | 92.4                    | 4.6       |
| 47  | Chloroneb               | 0.001 | 0.002 | 0.9986         | 84.6   | 117.5                    | 1.7       | 108.8                    | 3.4       | 96.6                    | 3.2       | 91.7                     | 7.1       | 88.2                     | 14.5      | 97.0                    | 1.6       |
| 48  | Chlorothalonil          | 0.001 | 0.003 | 0.9989         | 89.9   | 84.8                     | 2.4       | N.D.                     | N.D.      | N.D.                    | N.D.      | 81.1                     | 25.2      | 43.7                     | 87.0      | 80.1                    | 23.8      |
| 49  | Chlorpropham            | 0.001 | 0.003 | 0.9987         | 217.6  | 113.8                    | 1.0       | 104.3                    | 5.4       | 107.4                   | 5.0       | 91.5                     | 16.8      | 92.2                     | 15.3      | 92.4                    | 1.9       |
| 50  | Chlorpyrifos            | 0.001 | 0.002 | 0.9987         | 104.5  | 97.3                     | 1.2       | 107.1                    | 1.2       | 100.4                   | 2.8       | 94.9                     | 12.1      | 89.8                     | 19.6      | 87.3                    | 12.5      |
| 51  | Chlorpyrifos-methyl     | 0.001 | 0.003 | 0.9985         | 114.2  | 106.4                    | 7.6       | 98.6                     | 3.5       | 95.6                    | 4.8       | 91.0                     | 15.1      | 93.8                     | 11.8      | 95.8                    | 6.6       |
| 52  | Chlorthal-dimethyl      | 0.001 | 0.002 | 0.9992         | 69.8   | 115.0                    | 4.5       | 105.3                    | 2.4       | 96.8                    | 4.2       | 93.5                     | 8.6       | 90.1                     | 16.5      | 87.4                    | 11.7      |
| 53  | Chlorthion              | 0.001 | 0.004 | 0.9980         | 453.7  | 107.7                    | 8.2       | 106.7                    | 4.1       | 77.3                    | 4.6       | 102.9                    | 15.7      | 94.8                     | 24.3      | 92.9                    | 10.3      |
| 54  | Chlorthiophos           | 0.001 | 0.002 | 0.9996         | 151.0  | 114.6                    | 2.0       | 102.7                    | 3.5       | 83.2                    | 3.0       | 93.0                     | 9.7       | 91.8                     | 16.8      | 90.2                    | 7.9       |
| 55  | Chlozolate              | 0.001 | 0.002 | 0.9992         | 72.3   | 110.9                    | 3.1       | 102.9                    | 3.3       | 87.8                    | 3.5       | 92.4                     | 14.6      | 93.8                     | 12.4      | 91.4                    | 5.9       |
| 56  | Cinmethylin             | 0.002 | 0.006 | 0.9985         | 85.8   | 97.4                     | 14.6      | 95.5                     | 5.4       | 99.6                    | 1.0       | 89.2                     | 7.9       | 89.6                     | 15.8      | 94.3                    | 3.3       |
| 57  | Clomazone               | 0.001 | 0.003 | 0.9983         | 107.8  | 109.7                    | 4.3       | 101.2                    | 2.9       | 99.0                    | 3.9       | 92.3                     | 17.4      | 94.0                     | 14.5      | 93.9                    | 8.7       |
| 58  | Coumaphos               | 0.001 | 0.004 | 0.9993         | >500   | 116.4                    | 4.6       | 80.1                     | 3.4       | 70.9                    | 2.7       | 102.0                    | 9.5       | 96.5                     | 21.4      | 97.3                    | 10.6      |
| 59  | Cyanophos               | 0.001 | 0.002 | 0.9990         | 156.0  | 109.2                    | 5.2       | 94.4                     | 3.6       | 83.6                    | 6.3       | 87.9                     | 22.0      | 88.7                     | 18.8      | 91.6                    | 5.9       |
| 60  | Cyflufenamid            | 0.001 | 0.002 | 0.9997         | 210.0  | 95.9                     | 3.1       | 104.8                    | 5.2       | 86.6                    | 3.6       | 100.6                    | 6.0       | 95.8                     | 11.9      | 94.0                    | 4.5       |
| 61  | Cyfluthrin              | 0.002 | 0.006 | 0.9907         | >500   | 113.6                    | 3.1       | 114.8                    | 1.7       | 101.3                   | 2.3       | 107.3                    | 11.8      | 104.7                    | 13.6      | 108.0                   | 10.8      |

| No. | Analyte                  | LOD   | LOQ   | R <sup>2</sup> | ME.(%) | Repeatability (n=5)      |           |                          |           |                         |           | Reproducibility (n=11)   |           |                          |           |                         |           |
|-----|--------------------------|-------|-------|----------------|--------|--------------------------|-----------|--------------------------|-----------|-------------------------|-----------|--------------------------|-----------|--------------------------|-----------|-------------------------|-----------|
|     |                          |       |       |                |        | 0.01 mg kg <sup>-1</sup> |           | 0.02 mg kg <sup>-1</sup> |           | 0.1 mg kg <sup>-1</sup> |           | 0.01 mg kg <sup>-1</sup> |           | 0.02 mg kg <sup>-1</sup> |           | 0.1 mg kg <sup>-1</sup> |           |
|     |                          |       |       |                |        | Rec.<br>(%)              | CV<br>(%) | Rec.<br>(%)              | CV<br>(%) | Rec.<br>(%)             | CV<br>(%) | Rec.<br>(%)              | CV<br>(%) | Rec.<br>(%)              | CV<br>(%) | Rec.<br>(%)             | CV<br>(%) |
| 62  | Cyhalofop-butyl          | 0.001 | 0.002 | 0.9996         | 392.0  | 107.7                    | 2.3       | 99.1                     | 1.6       | 82.8                    | 2.4       | 94.5                     | 7.7       | 91.7                     | 14.6      | 89.4                    | 5.7       |
| 63  | Cyhalothrin, $\gamma$ -  | 0.002 | 0.005 | 0.9998         | 461.1  | 107.5                    | 3.3       | 95.6                     | 1.6       | 88.5                    | 3.4       | 102.2                    | 6.7       | 102.4                    | 9.3       | 111.5                   | 12.5      |
|     | Cyhalothrin, $\lambda$ - | 0.001 | 0.004 | 0.9996         | >500   | 93.3                     | 4.1       | 21.4                     | 3.6       | 72.8                    | 4.9       | 107.7                    | 13.4      | 105.6                    | 12.6      | 111.7                   | 11.2      |
| 64  | Cypermethrin             | 0.002 | 0.007 | 0.9996         | >500   | 114.4                    | 4.2       | 103.0                    | 2.9       | 111.2                   | 2.6       | 109.8                    | 13.4      | 107.2                    | 13.5      | 108.2                   | 10.4      |
| 65  | Cyprazine                | 0.001 | 0.002 | 0.9991         | 83.9   | 111.3                    | 3.9       | 99.7                     | 2.9       | 89.1                    | 3.5       | 85.8                     | 9.2       | 88.0                     | 11.2      | 90.7                    | 3.6       |
| 66  | Cyprodinil               | 0.001 | 0.002 | 0.9996         | 113.2  | 110.3                    | 5.6       | 108.5                    | 2.3       | 94.4                    | 3.7       | 92.6                     | 3.6       | 91.9                     | 10.9      | 88.1                    | 7.8       |
| 67  | DDD, $p,p'$ -            | 0.001 | 0.002 | 0.9998         | 81.0   | 113.1                    | 2.5       | 104.2                    | 5.5       | 98.4                    | 2.8       | 100.2                    | 13.3      | 96.8                     | 18.7      | 92.5                    | 11.1      |
|     | DDE, $p,p'$ -            | 0.001 | 0.002 | 0.9998         | 66.7   | 107.4                    | 2.7       | 116.7                    | 1.8       | 112.2                   | 2.2       | 92.4                     | 0.7       | 91.5                     | 7.0       | 87.6                    | 6.2       |
|     | DDT, $o,p'$ -            | 0.001 | 0.004 | 0.9986         | 10.3   | 113.3                    | 3.3       | 95.0                     | 5.0       | 72.3                    | 4.5       | 101.4                    | 30.8      | 101.5                    | 33.4      | 111.3                   | 29.5      |
|     | DDT, $p,p'$ -            | 0.001 | 0.004 | 0.9984         | 18.4   | 115.5                    | 3.0       | 76.8                     | 9.6       | 83.9                    | 2.4       | 114.8                    | 23.1      | 109.9                    | 29.6      | 110.2                   | 21.9      |
| 68  | Deltamethrin             | 0.003 | 0.009 | 0.9997         | >500   | 101.2                    | 2.5       | 87.2                     | 2.5       | 83.9                    | 0.7       | 97.1                     | 0.8       | 86.2                     | 12.7      | 89.3                    | 9.3       |
| 69  | Desmetryn                | 0.001 | 0.003 | 0.9991         | 120.2  | 111.0                    | 3.0       | 107.6                    | 1.7       | 97.7                    | 4.5       | 90.1                     | 13.1      | 93.6                     | 11.9      | 97.1                    | 2.5       |
| 70  | Dialifor                 | 0.002 | 0.005 | 0.9991         | 379.6  | 112.9                    | 6.6       | 96.0                     | 4.7       | 82.3                    | 1.2       | 95.3                     | 21.0      | 94.5                     | 21.5      | 95.2                    | 9.1       |
| 71  | Di-Allate                | 0.001 | 0.003 | 0.9993         | 79.7   | 104.8                    | 6.2       | 100.1                    | 2.1       | 102.4                   | 5.1       | 93.2                     | 4.4       | 90.6                     | 12.4      | 86.3                    | 15.0      |
| 72  | Diazinon                 | 0.001 | 0.004 | 0.9986         | 90.2   | 106.4                    | 8.9       | 104.4                    | 3.0       | 101.0                   | 4.4       | 94.2                     | 10.3      | 87.7                     | 16.2      | 92.8                    | 4.0       |
| 73  | Dichlobenil              | 0.002 | 0.006 | 0.9993         | 53.2   | 105.0                    | 7.2       | 98.6                     | 2.7       | 113.7                   | 6.1       | 93.9                     | 1.7       | 90.6                     | 12.7      | 92.8                    | 3.0       |
| 74  | Dichlofenthion           | 0.001 | 0.002 | 0.9978         | 92.3   | 107.8                    | 4.9       | 105.4                    | 3.1       | 98.7                    | 4.2       | 92.6                     | 7.6       | 89.5                     | 15.8      | 92.8                    | 1.9       |
| 75  | Dichlofluanid            | 0.001 | 0.003 | 0.9690         | 219.5  | 100.0                    | 11.8      | 116.0                    | 4.0       | 70.5                    | 4.4       | 83.0                     | 28.2      | 69.0                     | 36.6      | 81.0                    | 11.1      |
| 76  | Dichlormid               | 0.001 | 0.004 | 0.9993         | 99.5   | 103.0                    | 9.3       | 103.8                    | 2.8       | 113.9                   | 7.2       | 101.4                    | 15.9      | 101.1                    | 12.4      | 101.2                   | 9.0       |
| 77  | Diclobutrazol            | 0.001 | 0.002 | 0.9998         | >500   | 116.1                    | 3.6       | 109.3                    | 2.1       | 84.5                    | 4.9       | 97.5                     | 5.5       | 96.6                     | 8.1       | 95.0                    | 4.4       |
| 78  | Diclofop-methyl          | 0.001 | 0.002 | 0.9998         | 159.5  | 117.4                    | 3.7       | 99.3                     | 2.9       | 82.8                    | 2.2       | 93.7                     | 2.6       | 93.3                     | 11.4      | 88.2                    | 6.4       |
| 79  | Dicloran                 | 0.001 | 0.004 | 0.9991         | 176.6  | 108.1                    | 6.2       | 112.6                    | 4.9       | 103.3                   | 5.0       | 98.5                     | 13.1      | 94.0                     | 22.4      | 95.3                    | 10.4      |
| 80  | Dicofol                  | 0.001 | 0.002 | 0.9999         | 54.4   | 109.7                    | 6.6       | 105.9                    | 1.2       | 96.2                    | 2.6       | 92.7                     | 5.9       | 85.2                     | 9.5       | 90.2                    | 10.0      |

| No. | Analyte                | LOD   | LOQ   | R <sup>2</sup> | ME.(%) | Repeatability (n=5)      |           |                          |           |                         |           | Reproducibility (n=11)   |           |                          |           |                         |           |
|-----|------------------------|-------|-------|----------------|--------|--------------------------|-----------|--------------------------|-----------|-------------------------|-----------|--------------------------|-----------|--------------------------|-----------|-------------------------|-----------|
|     |                        |       |       |                |        | 0.01 mg kg <sup>-1</sup> |           | 0.02 mg kg <sup>-1</sup> |           | 0.1 mg kg <sup>-1</sup> |           | 0.01 mg kg <sup>-1</sup> |           | 0.02 mg kg <sup>-1</sup> |           | 0.1 mg kg <sup>-1</sup> |           |
|     |                        |       |       |                |        | Rec.<br>(%)              | CV<br>(%) | Rec.<br>(%)              | CV<br>(%) | Rec.<br>(%)             | CV<br>(%) | Rec.<br>(%)              | CV<br>(%) | Rec.<br>(%)              | CV<br>(%) | Rec.<br>(%)             | CV<br>(%) |
| 81  | Diclotophos            | 0.002 | 0.005 | 0.9997         | >500   | 108.6                    | 2.6       | 86.4                     | 5.6       | 81.7                    | 2.8       | 89.2                     | 28.8      | 87.6                     | 27.3      | 84.1                    | 24.2      |
| 82  | Diethatyl-ethyl        | 0.002 | 0.005 | 0.9998         | 84.3   | 114.6                    | 2.0       | 111.8                    | 2.0       | 99.8                    | 2.9       | 101.4                    | 11.3      | 99.4                     | 16.6      | 97.1                    | 9.3       |
| 83  | Diethofencarb          | 0.001 | 0.002 | 0.9988         | 371.8  | 112.0                    | 5.1       | 117.3                    | 3.0       | 94.5                    | 6.3       | 99.2                     | 8.2       | 94.6                     | 15.3      | 90.9                    | 10.7      |
| 84  | Difenoconazole         | 0.001 | 0.004 | 0.9976         | >500   | 101.7                    | 4.7       | 92.0                     | 3.9       | 73.7                    | 5.6       | 100.3                    | 6.9       | 97.7                     | 8.5       | 97.7                    | 2.0       |
| 85  | Diflufenican           | 0.001 | 0.002 | 0.9997         | 301.8  | 117.8                    | 3.4       | 101.2                    | 2.2       | 80.8                    | 3.0       | 98.6                     | 4.7       | 95.5                     | 2.9       | 92.4                    | 2.5       |
| 86  | Dimepiperate           | 0.001 | 0.003 | 0.9993         | 122.8  | 113.8                    | 5.0       | 106.9                    | 2.3       | 93.5                    | 2.8       | 93.7                     | 7.3       | 90.1                     | 15.3      | 87.1                    | 10.5      |
| 87  | Dimethachlor           | 0.001 | 0.002 | 0.9988         | 85.1   | 118.4                    | 1.5       | 114.7                    | 2.3       | 112.5                   | 5.1       | 98.2                     | 13.9      | 96.7                     | 12.6      | 87.5                    | 19.1      |
| 88  | Dimethametryn          | 0.001 | 0.002 | 0.9994         | 123.1  | 112.6                    | 5.3       | 108.7                    | 1.5       | 93.0                    | 3.4       | 96.4                     | 2.9       | 94.1                     | 9.6       | 91.0                    | 6.1       |
| 89  | Dimethenamid           | 0.001 | 0.003 | 0.9987         | 80.2   | 111.5                    | 3.7       | 109.8                    | 2.2       | 104.7                   | 4.1       | 92.8                     | 7.9       | 89.9                     | 17.1      | 87.2                    | 15.1      |
| 90  | Dimethipin             | 0.002 | 0.005 | 1.0000         | 92.5   | 79.9                     | 0.7       | 72.3                     | 2.2       | 75.1                    | 0.7       | 118.0                    | 31.6      | 105.1                    | 34.7      | 106.4                   | 31.5      |
| 91  | Dimethomorph (E)       | 0.001 | 0.004 | 0.9995         | >500   | 117.1                    | 3.9       | 104.3                    | 1.0       | 74.8                    | 3.5       | 103.4                    | 6.3       | 99.3                     | 8.4       | 101.8                   | 8.3       |
|     | Dimethomorph (Z)       | 0.001 | 0.004 | 0.9999         | >500   | 117.1                    | 4.2       | 91.5                     | 0.8       | 77.4                    | 2.8       | 102.4                    | 5.4       | 98.8                     | 7.9       | 102.6                   | 7.1       |
| 92  | Dimethylvinphos (E)    | 0.001 | 0.004 | 0.9988         | 331.6  | 107.9                    | 7.3       | 117.0                    | 5.7       | 110.7                   | 5.0       | 90.5                     | 10.7      | 88.1                     | 11.4      | 83.1                    | 10.1      |
|     | Dimethylvinphos (Z)    | 0.001 | 0.004 | 0.9990         | 416.1  | 111.1                    | 8.2       | 101.7                    | 5.0       | 85.6                    | 3.2       | 91.7                     | 10.2      | 86.9                     | 10.3      | 83.5                    | 10.3      |
| 93  | Diniconazole           | 0.001 | 0.003 | 0.9996         | >500   | 116.8                    | 2.2       | 105.6                    | 1.5       | 75.8                    | 5.0       | 102.9                    | 2.2       | 98.4                     | 6.1       | 96.9                    | 6.0       |
| 94  | Dinitramine            | 0.002 | 0.005 | 0.9977         | 165.8  | 107.7                    | 2.5       | 116.4                    | 1.1       | 102.3                   | 3.4       | 100.3                    | 9.7       | 92.5                     | 15.4      | 90.7                    | 9.8       |
| 95  | Dioxathion             | 0.001 | 0.002 | 0.9991         | 59.7   | 116.2                    | 2.0       | 91.0                     | 7.4       | 83.5                    | 2.8       | 85.8                     | 23.1      | 93.1                     | 10.2      | 91.2                    | 9.1       |
| 96  | Diphenamid             | 0.001 | 0.003 | 0.9994         | 79.4   | 115.5                    | 2.8       | 114.5                    | 2.0       | 98.0                    | 3.9       | 95.3                     | 3.6       | 92.7                     | 11.4      | 90.1                    | 7.6       |
| 97  | Diphenylamine          | 0.001 | 0.003 | 0.9994         | 153.3  | 107.3                    | 5.2       | 103.1                    | 3.5       | 106.8                   | 4.6       | 89.7                     | 11.4      | 88.8                     | 15.7      | 89.8                    | 7.3       |
| 98  | Dithiopyr              | 0.001 | 0.002 | 0.9983         | 71.6   | 112.3                    | 4.7       | 108.4                    | 2.9       | 99.2                    | 3.3       | 96.4                     | 2.3       | 92.6                     | 7.1       | 88.4                    | 6.0       |
| 99  | Edifenphos             | 0.002 | 0.006 | 0.9997         | >500   | 108.0                    | 5.0       | 86.0                     | 3.2       | 71.8                    | 2.8       | 96.7                     | 3.5       | 93.5                     | 7.2       | 90.9                    | 14.2      |
| 100 | Endosulfan, $\alpha$ - | 0.001 | 0.002 | 0.9993         | 30.4   | 113.4                    | 0.4       | 101.1                    | 3.2       | 95.2                    | 3.2       | 89.7                     | 8.3       | 90.2                     | 14.4      | 88.5                    | 9.8       |
|     | Endosulfan, $\beta$ -  | 0.001 | 0.003 | 0.9996         | 44.4   | 109.1                    | 1.7       | 102.1                    | 5.8       | 93.7                    | 1.2       | 91.7                     | 19.0      | 94.8                     | 16.2      | 94.4                    | 6.8       |

| No. | Analyte              | LOD   | LOQ   | R <sup>2</sup> | ME.(%) | Repeatability (n=5)      |           |                          |           |                         |           | Reproducibility (n=11)   |           |                          |           |                         |           |
|-----|----------------------|-------|-------|----------------|--------|--------------------------|-----------|--------------------------|-----------|-------------------------|-----------|--------------------------|-----------|--------------------------|-----------|-------------------------|-----------|
|     |                      |       |       |                |        | 0.01 mg kg <sup>-1</sup> |           | 0.02 mg kg <sup>-1</sup> |           | 0.1 mg kg <sup>-1</sup> |           | 0.01 mg kg <sup>-1</sup> |           | 0.02 mg kg <sup>-1</sup> |           | 0.1 mg kg <sup>-1</sup> |           |
|     |                      |       |       |                |        | Rec.<br>(%)              | CV<br>(%) | Rec.<br>(%)              | CV<br>(%) | Rec.<br>(%)             | CV<br>(%) | Rec.<br>(%)              | CV<br>(%) | Rec.<br>(%)              | CV<br>(%) | Rec.<br>(%)             | CV<br>(%) |
|     | Endosulfan, sulfate- | 0.001 | 0.002 | 0.9996         | 92.9   | 114.3                    | 2.8       | 107.7                    | 4.4       | 91.4                    | 2.8       | 96.2                     | 4.1       | 90.4                     | 14.2      | 98.2                    | 12.9      |
| 101 | Endrin               | 0.001 | 0.002 | 0.9997         | 74.9   | 114.2                    | 2.2       | 105.7                    | 4.3       | 95.0                    | 2.5       | 96.5                     | 15.2      | 93.3                     | 19.0      | 90.1                    | 12.1      |
|     | δ-keto-Endrin        | 0.001 | 0.003 | 0.9966         | 52.1   | 111.7                    | 2.5       | 101.5                    | 5.3       | 89.7                    | 1.4       | 100.1                    | 3.0       | 93.9                     | 9.6       | 95.2                    | 9.1       |
| 102 | EPN                  | 0.002 | 0.005 | 0.9989         | 311.8  | 113.5                    | 3.8       | 99.4                     | 3.1       | 72.3                    | 3.5       | 93.7                     | 12.5      | 102.0                    | 17.1      | 105.8                   | 6.4       |
| 103 | Epoxiconazole        | 0.001 | 0.003 | 0.9996         | 185.5  | 113.1                    | 1.6       | 104.0                    | 2.3       | 84.6                    | 2.4       | 101.4                    | 12.3      | 99.0                     | 15.9      | 96.7                    | 10.6      |
| 104 | EPTC                 | 0.001 | 0.003 | 0.9966         | 50.6   | 102.6                    | 14.4      | 91.3                     | 9.8       | 113.8                   | 8.3       | 100.0                    | 4.5       | 93.8                     | 11.8      | 88.5                    | 14.7      |
| 105 | Etaconazole-1        | 0.001 | 0.003 | 0.9997         | 136.2  | 115.9                    | 2.8       | 110.7                    | 2.2       | 90.6                    | 3.6       | 103.5                    | 7.4       | 100.3                    | 15.2      | 96.8                    | 7.4       |
|     | Etaconazole-2        | 0.001 | 0.002 | 0.9999         | 100.4  | 114.1                    | 2.7       | 114.7                    | 1.0       | 95.1                    | 3.9       | 99.4                     | 1.6       | 93.6                     | 15.0      | 93.5                    | 6.4       |
| 106 | Ethalfuralin         | 0.001 | 0.004 | 0.9971         | 146.6  | 106.8                    | 6.4       | 111.9                    | 1.9       | 113.0                   | 5.5       | 100.7                    | 2.3       | 94.4                     | 11.4      | 91.2                    | 9.4       |
| 107 | Ethion               | 0.001 | 0.003 | 0.9994         | 198.5  | 114.4                    | 3.8       | 99.4                     | 3.1       | 76.5                    | 4.0       | 98.9                     | 10.0      | 94.6                     | 18.0      | 93.3                    | 4.7       |
| 108 | Ethofumesate         | 0.002 | 0.006 | 0.9992         | 95.3   | 114.1                    | 2.0       | 113.1                    | 2.6       | 98.5                    | 3.3       | 93.1                     | 9.7       | 88.9                     | 14.2      | 86.7                    | 12.6      |
| 109 | Ethoprophos          | 0.001 | 0.002 | 0.9985         | 227.7  | 106.0                    | 5.3       | 112.1                    | 2.0       | 112.4                   | 8.5       | 88.1                     | 11.0      | 89.1                     | 11.5      | 91.1                    | 7.0       |
| 110 | Ethychlozate         | 0.001 | 0.002 | 0.9998         | 406.2  | 110.4                    | 5.9       | 112.0                    | 2.4       | 84.7                    | 6.1       | 93.3                     | 11.5      | 97.9                     | 12.8      | 88.0                    | 6.7       |
| 111 | Etoxazole            | 0.001 | 0.002 | 0.9996         | 218.4  | 104.8                    | 3.4       | 98.3                     | 2.3       | 82.4                    | 2.4       | 96.2                     | 6.5       | 91.9                     | 11.5      | 93.1                    | 3.5       |
| 112 | Etridiazole          | 0.002 | 0.007 | 0.9960         | 85.7   | 100.8                    | 5.6       | 90.5                     | 4.0       | 91.3                    | 8.0       | 97.2                     | 6.6       | 97.4                     | 16.2      | 94.8                    | 21.1      |
| 113 | Fenamidone           | 0.001 | 0.002 | 0.9996         | 159.3  | 106.3                    | 1.0       | 108.6                    | 1.5       | 88.3                    | 2.3       | 99.7                     | 3.3       | 95.2                     | 8.7       | 95.6                    | 4.5       |
| 114 | Fenarimol            | 0.001 | 0.003 | 0.9996         | 297.8  | 112.1                    | 2.4       | 103.7                    | 1.7       | 86.9                    | 2.7       | 98.5                     | 4.9       | 97.9                     | 4.2       | 96.9                    | 4.3       |
| 115 | Fenbuconazole        | 0.001 | 0.003 | 0.9997         | 451.8  | 109.1                    | 1.7       | 98.4                     | 1.5       | 83.8                    | 2.1       | 96.0                     | 6.4       | 90.8                     | 15.7      | 91.5                    | 5.0       |
| 116 | Fenchlorphos         | 0.001 | 0.002 | 0.9977         | 125.3  | 103.6                    | 6.7       | 101.3                    | 3.5       | 94.4                    | 4.0       | 88.4                     | 12.6      | 92.6                     | 10.1      | 93.0                    | 2.8       |
| 117 | Fenclorim            | 0.001 | 0.002 | 0.9958         | 108.8  | 97.4                     | 9.4       | 95.3                     | 5.3       | 93.0                    | 5.4       | 94.5                     | 9.6       | 94.7                     | 7.3       | 91.4                    | 2.1       |
| 118 | Fenfuram             | 0.001 | 0.002 | 0.9993         | 151.5  | 113.3                    | 3.5       | 116.7                    | 2.1       | 103.5                   | 4.1       | 92.0                     | 3.1       | 89.1                     | 11.0      | 88.0                    | 8.5       |
| 119 | Fenitrothion         | 0.002 | 0.005 | 0.9985         | 345.4  | 109.8                    | 5.0       | 106.5                    | 2.9       | 86.0                    | 4.6       | 94.9                     | 14.4      | 91.0                     | 20.3      | 88.7                    | 14.5      |
| 120 | Fenobucarb           | 0.002 | 0.006 | 0.9987         | 236.5  | 108.7                    | 6.3       | 117.5                    | 5.2       | 104.5                   | 3.6       | 95.7                     | 22.4      | 97.6                     | 11.4      | 101.7                   | 13.3      |

| No. | Analyte            | LOD   | LOQ   | R <sup>2</sup> | ME.(%) | Repeatability (n=5)      |           |                          |           |                         |           | Reproducibility (n=11)   |           |                          |           |                         |           |
|-----|--------------------|-------|-------|----------------|--------|--------------------------|-----------|--------------------------|-----------|-------------------------|-----------|--------------------------|-----------|--------------------------|-----------|-------------------------|-----------|
|     |                    |       |       |                |        | 0.01 mg kg <sup>-1</sup> |           | 0.02 mg kg <sup>-1</sup> |           | 0.1 mg kg <sup>-1</sup> |           | 0.01 mg kg <sup>-1</sup> |           | 0.02 mg kg <sup>-1</sup> |           | 0.1 mg kg <sup>-1</sup> |           |
|     |                    |       |       |                |        | Rec.<br>(%)              | CV<br>(%) | Rec.<br>(%)              | CV<br>(%) | Rec.<br>(%)             | CV<br>(%) | Rec.<br>(%)              | CV<br>(%) | Rec.<br>(%)              | CV<br>(%) | Rec.<br>(%)             | CV<br>(%) |
| 121 | Fenothiocarb       | 0.001 | 0.002 | 0.9998         | 216.7  | 116.3                    | 3.9       | 97.6                     | 2.9       | 82.6                    | 2.3       | 93.6                     | 4.5       | 93.0                     | 11.4      | 89.2                    | 9.1       |
| 122 | Fenoxanil          | 0.001 | 0.003 | 0.9998         | >500   | 62.6                     | 7.6       | 109.6                    | 2.6       | 118.2                   | 3.7       | 101.0                    | 7.4       | 99.9                     | 13.7      | 87.0                    | 6.2       |
| 123 | Fenpropathrin      | 0.001 | 0.003 | 0.9992         | 175.3  | 116.9                    | 2.5       | 101.3                    | 2.6       | 88.1                    | 2.1       | 99.7                     | 12.0      | 95.8                     | 14.4      | 94.7                    | 4.3       |
| 124 | Fenpropimorph      | 0.001 | 0.002 | 0.9984         | 125.4  | 112.8                    | 4.5       | 113.0                    | 1.4       | 101.6                   | 2.1       | 94.0                     | 6.2       | 91.0                     | 12.8      | 92.0                    | 10.0      |
| 125 | Fenpyrazamine      | 0.002 | 0.006 | 0.9984         | >500   | 92.6                     | 4.3       | 74.9                     | 2.4       | 100.1                   | 4.4       | 92.1                     | 6.3       | 88.1                     | 18.0      | 98.7                    | 16.6      |
| 126 | Fenson             | 0.001 | 0.002 | 0.9996         | 60.2   | 113.4                    | 3.1       | 112.4                    | 1.9       | 98.5                    | 2.8       | 96.2                     | 9.6       | 92.6                     | 17.0      | 89.1                    | 13.1      |
| 127 | Fenthion           | 0.001 | 0.003 | 0.9989         | 133.0  | 113.6                    | 5.4       | 106.4                    | 2.6       | 91.1                    | 4.2       | 90.8                     | 14.5      | 94.6                     | 13.7      | 94.4                    | 3.2       |
| 128 | Fenvalerate-1      | 0.002 | 0.006 | 0.9996         | >500   | 109.8                    | 3.6       | 118.5                    | 2.4       | 101.9                   | 3.5       | 107.1                    | 14.1      | 102.5                    | 17.9      | 106.0                   | 6.8       |
|     | Fenvalerate-2      | 0.002 | 0.006 | 0.9995         | >500   | 120.9                    | 3.5       | 109.3                    | 3.5       | 96.7                    | 4.9       | 107.6                    | 11.6      | 99.0                     | 14.0      | 105.6                   | 4.9       |
| 129 | Fipronil           | 0.001 | 0.003 | 0.9996         | 356.9  | 117.4                    | 7.0       | 117.8                    | 2.8       | 90.6                    | 6.5       | 102.5                    | 4.0       | 98.0                     | 8.5       | 97.7                    | 5.2       |
| 130 | Flamprop-isopropyl | 0.001 | 0.003 | 0.9998         | 99.9   | 118.0                    | 3.8       | 115.6                    | 3.1       | 92.8                    | 2.9       | 100.0                    | 0.2       | 99.3                     | 8.1       | 96.7                    | 4.0       |
| 131 | Fluacrypyrim       | 0.001 | 0.003 | 0.9996         | 200.4  | 111.0                    | 1.4       | 104.1                    | 2.5       | 82.3                    | 3.1       | 99.3                     | 4.2       | 98.2                     | 9.3       | 93.9                    | 4.0       |
| 132 | Fluazifop-butyl    | 0.001 | 0.002 | 0.9995         | 201.2  | 115.6                    | 1.8       | 105.2                    | 2.7       | 80.9                    | 4.0       | 97.3                     | 6.0       | 95.3                     | 13.5      | 90.1                    | 7.6       |
| 133 | Fluchloralin       | 0.002 | 0.005 | 0.9963         | 137.1  | 108.8                    | 7.9       | 119.3                    | 0.6       | 111.9                   | 5.2       | 108.7                    | 6.4       | 99.2                     | 12.0      | 93.9                    | 9.6       |
| 134 | Flucythrinate-1    | 0.002 | 0.005 | 0.9995         | >500   | 116.6                    | 2.0       | 110.2                    | 2.0       | 92.1                    | 3.4       | 99.1                     | 18.5      | 99.6                     | 16.9      | 107.5                   | 11.3      |
|     | Flucythrinate-2    | 0.002 | 0.006 | 0.9993         | >500   | 116.9                    | 1.0       | 105.2                    | 3.9       | 117.4                   | 3.0       | 100.3                    | 17.0      | 104.9                    | 15.7      | 107.7                   | 9.7       |
| 135 | Fluensulfone       | 0.001 | 0.003 | 0.9985         | 182.4  | 97.0                     | 5.6       | 99.1                     | 2.0       | 103.5                   | 5.4       | 90.7                     | 16.4      | 90.4                     | 15.4      | 93.7                    | 5.3       |
| 136 | Flufenpyr-ethyl    | 0.001 | 0.002 | 0.9993         | 254.4  | 113.0                    | 4.5       | 110.7                    | 2.3       | 82.7                    | 4.7       | 108.9                    | 5.9       | 104.3                    | 11.0      | 103.2                   | 3.3       |
| 137 | Flumetralin        | 0.001 | 0.004 | 0.9984         | 157.7  | 114.1                    | 6.9       | 113.5                    | 1.8       | 91.9                    | 4.2       | 106.0                    | 8.0       | 102.7                    | 11.4      | 103.0                   | 3.9       |
| 138 | Flumioxazin        | 0.001 | 0.004 | 0.9991         | >500   | 111.7                    | 2.4       | 73.6                     | 1.0       | 85.4                    | 5.2       | 107.0                    | 11.8      | 99.8                     | 20.9      | 104.7                   | 1.4       |
| 139 | Fluopyram          | 0.001 | 0.002 | 0.9998         | 227.0  | 117.3                    | 5.7       | 114.4                    | 1.6       | 92.4                    | 3.9       | 98.8                     | 2.0       | 96.6                     | 7.3       | 92.5                    | 5.8       |
| 140 | Fluorochloridone   | 0.001 | 0.002 | 0.9999         | 129.7  | 109.8                    | 3.1       | 90.4                     | 3.9       | 80.6                    | 0.8       | 97.5                     | 5.4       | 91.2                     | 12.6      | 87.1                    | 2.7       |
| 141 | Fluquinconazole    | 0.001 | 0.003 | 0.9976         | 232.1  | 108.9                    | 4.8       | 118.4                    | 1.7       | 100.3                   | 3.7       | 99.5                     | 3.6       | 99.0                     | 9.4       | 97.7                    | 6.5       |

| No. | Analyte            | LOD   | LOQ   | R <sup>2</sup> | ME.(%) | Repeatability (n=5)      |           |                          |           |                         |           | Reproducibility (n=11)   |           |                          |           |                         |           |
|-----|--------------------|-------|-------|----------------|--------|--------------------------|-----------|--------------------------|-----------|-------------------------|-----------|--------------------------|-----------|--------------------------|-----------|-------------------------|-----------|
|     |                    |       |       |                |        | 0.01 mg kg <sup>-1</sup> |           | 0.02 mg kg <sup>-1</sup> |           | 0.1 mg kg <sup>-1</sup> |           | 0.01 mg kg <sup>-1</sup> |           | 0.02 mg kg <sup>-1</sup> |           | 0.1 mg kg <sup>-1</sup> |           |
|     |                    |       |       |                |        | Rec.<br>(%)              | CV<br>(%) | Rec.<br>(%)              | CV<br>(%) | Rec.<br>(%)             | CV<br>(%) | Rec.<br>(%)              | CV<br>(%) | Rec.<br>(%)              | CV<br>(%) | Rec.<br>(%)             | CV<br>(%) |
| 142 | Flusilazole        | 0.001 | 0.002 | 0.9995         | 137.5  | 117.9                    | 2.7       | 117.2                    | 2.4       | 94.4                    | 3.9       | 98.5                     | 2.9       | 94.2                     | 10.2      | 92.3                    | 5.7       |
| 143 | Flutianil          | 0.001 | 0.003 | 0.9996         | 365.1  | 116.1                    | 4.7       | 97.1                     | 0.9       | 81.6                    | 2.5       | 102.3                    | 4.7       | 97.1                     | 10.6      | 97.9                    | 6.5       |
| 144 | Fluvalinate-1      | 0.003 | 0.008 | 0.9994         | >500   | 105.0                    | 8.2       | 94.6                     | 1.6       | 81.7                    | 3.3       | 116.4                    | 10.7      | 109.9                    | 8.4       | 122.5                   | 21.4      |
|     | Fluvalinate-2      | 0.003 | 0.008 | 0.9992         | >500   | 108.3                    | 7.7       | 94.6                     | 3.1       | 78.8                    | 7.0       | 117.1                    | 10.4      | 108.1                    | 6.5       | 121.3                   | 22.4      |
| 145 | Fluxapyroxad       | 0.001 | 0.003 | 0.9997         | 496.5  | 110.0                    | 2.3       | 100.1                    | 1.2       | 80.1                    | 3.5       | 100.0                    | 2.6       | 95.5                     | 8.3       | 94.1                    | 3.6       |
| 146 | Fonofos            | 0.001 | 0.002 | 0.9977         | 92.1   | 109.2                    | 5.4       | 105.4                    | 2.2       | 101.1                   | 4.3       | 92.9                     | 7.1       | 88.0                     | 16.8      | 92.0                    | 4.2       |
| 147 | Formothion         | 0.002 | 0.005 | 1.0000         | 263.4  | 82.3                     | 9.4       | 78.4                     | 5.4       | 76.7                    | 1.9       | 80.9                     | 9.6       | 92.7                     | 25.6      | 91.9                    | 17.0      |
| 148 | Fthalide           | 0.001 | 0.002 | 0.9994         | 78.7   | 105.2                    | 14.1      | 97.9                     | 2.1       | 92.3                    | 3.7       | 101.2                    | 12.9      | 94.8                     | 21.8      | 90.6                    | 16.5      |
| 149 | Halfenprox         | 0.001 | 0.004 | 0.9991         | 303.5  | 116.2                    | 3.3       | 92.2                     | 2.4       | 79.3                    | 1.9       | 102.9                    | 11.8      | 97.6                     | 17.1      | 100.8                   | 3.6       |
| 150 | Heptachlor         | 0.002 | 0.005 | 0.9961         | 73.0   | 109.2                    | 5.8       | 97.0                     | 3.2       | 92.2                    | 5.3       | 95.8                     | 11.1      | 91.9                     | 10.2      | 86.7                    | 9.8       |
|     | Heptachlor epoxide | 0.001 | 0.003 | 0.9996         | 40.9   | 110.1                    | 6.4       | 102.8                    | 4.9       | 98.8                    | 2.5       | 96.0                     | 9.3       | 95.7                     | 12.9      | 91.0                    | 7.8       |
| 151 | Heptenophos        | 0.001 | 0.003 | 0.9991         | 249.7  | 100.9                    | 6.3       | 105.7                    | 3.3       | 115.8                   | 7.9       | 94.1                     | 23.2      | 94.4                     | 17.1      | 99.0                    | 7.8       |
| 152 | Hexythiazox        | 0.001 | 0.002 | 0.9998         | 269.5  | 115.6                    | 5.5       | 100.1                    | 4.2       | 79.2                    | 3.9       | 98.0                     | 5.7       | 96.1                     | 8.3       | 91.1                    | 7.8       |
| 153 | Indanofan          | 0.001 | 0.004 | 0.9994         | 290.4  | 105.5                    | 2.8       | 97.9                     | 2.5       | 81.8                    | 2.1       | 102.3                    | 6.1       | 96.1                     | 11.6      | 95.2                    | 5.4       |
| 154 | Indoxacarb         | 0.001 | 0.002 | 0.9998         | 357.5  | 115.8                    | 6.1       | 106.1                    | 3.5       | 104.4                   | 2.1       | 94.5                     | 19.2      | 92.8                     | 15.7      | 101.2                   | 10.8      |
| 155 | Ipconazole         | 0.001 | 0.003 | 0.9995         | 473.0  | 111.3                    | 1.6       | 102.3                    | 1.9       | 85.6                    | 2.5       | 98.2                     | 2.3       | 97.1                     | 5.9       | 96.4                    | 3.8       |
| 156 | Iprobenfos         | 0.001 | 0.004 | 0.9988         | 388.1  | 99.2                     | 3.0       | 108.9                    | 2.2       | 96.5                    | 5.4       | 95.9                     | 8.8       | 90.1                     | 17.2      | 86.6                    | 15.3      |
| 157 | Iprodione          | 0.002 | 0.007 | 0.9998         | >500   | 92.6                     | 5.5       | 71.3                     | 3.5       | 63.6                    | 1.8       | 103.7                    | 17.3      | 96.9                     | 21.8      | 105.8                   | 17.0      |
| 158 | Isazofos           | 0.001 | 0.002 | 0.9978         | 91.8   | 116.2                    | 1.0       | 109.1                    | 1.2       | 103.7                   | 3.9       | 88.0                     | 11.1      | 91.4                     | 11.1      | 93.5                    | 3.5       |
| 159 | Isofenphos         | 0.001 | 0.003 | 0.9992         | 109.3  | 114.2                    | 4.9       | 109.4                    | 2.2       | 94.5                    | 3.5       | 97.3                     | 4.6       | 94.4                     | 10.2      | 91.7                    | 5.2       |
| 160 | Isofenphos-methyl  | 0.001 | 0.002 | 0.9992         | 114.6  | 111.1                    | 3.9       | 112.6                    | 2.8       | 94.6                    | 3.8       | 97.6                     | 6.9       | 93.6                     | 13.6      | 91.4                    | 6.0       |
| 161 | Isoproc carb       | 0.002 | 0.005 | 0.9985         | 250.0  | 101.0                    | 8.0       | 117.8                    | 8.2       | 102.3                   | 2.7       | 86.2                     | 18.2      | 99.4                     | 17.5      | 99.2                    | 15.2      |
| 162 | Isopropalin        | 0.001 | 0.004 | 0.9974         | 136.4  | 110.9                    | 3.8       | 116.8                    | 3.3       | 97.1                    | 3.8       | 101.8                    | 4.8       | 96.3                     | 10.3      | 97.8                    | 3.5       |

| No. | Analyte                 | LOD   | LOQ   | R <sup>2</sup> | ME.(%) | Repeatability (n=5)      |           |                          |           |                         |           | Reproducibility (n=11)   |           |                          |           |                         |           |
|-----|-------------------------|-------|-------|----------------|--------|--------------------------|-----------|--------------------------|-----------|-------------------------|-----------|--------------------------|-----------|--------------------------|-----------|-------------------------|-----------|
|     |                         |       |       |                |        | 0.01 mg kg <sup>-1</sup> |           | 0.02 mg kg <sup>-1</sup> |           | 0.1 mg kg <sup>-1</sup> |           | 0.01 mg kg <sup>-1</sup> |           | 0.02 mg kg <sup>-1</sup> |           | 0.1 mg kg <sup>-1</sup> |           |
|     |                         |       |       |                |        | Rec.<br>(%)              | CV<br>(%) | Rec.<br>(%)              | CV<br>(%) | Rec.<br>(%)             | CV<br>(%) | Rec.<br>(%)              | CV<br>(%) | Rec.<br>(%)              | CV<br>(%) | Rec.<br>(%)             | CV<br>(%) |
| 163 | Isoprothiolane          | 0.003 | 0.008 | 0.9998         | 130.3  | 115.1                    | 1.6       | 112.3                    | 3.0       | 111.9                   | 2.7       | 96.9                     | 6.7       | 92.4                     | 12.5      | 90.3                    | 8.8       |
| 164 | Isopyrazam              | 0.001 | 0.003 | 0.9996         | >500   | 118.1                    | 1.0       | 106.9                    | 2.7       | 91.3                    | 2.1       | 100.3                    | 5.1       | 98.9                     | 6.3       | 99.8                    | 7.5       |
| 165 | Isotianil               | 0.001 | 0.004 | 0.9994         | >500   | 114.6                    | 4.9       | 99.5                     | 1.9       | 72.9                    | 3.6       | 106.2                    | 10.5      | 100.6                    | 12.5      | 96.0                    | 7.2       |
| 166 | Isoxadifen-ethyl        | 0.001 | 0.002 | 0.9994         | 145.2  | 117.5                    | 4.2       | 102.9                    | 3.1       | 81.4                    | 3.0       | 95.5                     | 10.7      | 92.0                     | 16.9      | 93.7                    | 5.4       |
| 167 | Kresoxim-methyl         | 0.001 | 0.002 | 0.9997         | 89.2   | 116.1                    | 3.6       | 117.4                    | 3.1       | 102.3                   | 2.0       | 94.5                     | 6.0       | 91.8                     | 13.7      | 91.0                    | 6.7       |
| 168 | Leptophos               | 0.001 | 0.003 | 0.9995         | 233.4  | 110.8                    | 4.6       | 94.7                     | 4.4       | 84.0                    | 1.4       | 98.6                     | 15.2      | 98.0                     | 16.8      | 96.1                    | 5.5       |
| 169 | Mefenpyr-diethyl        | 0.001 | 0.003 | 0.9995         | 197.8  | 112.2                    | 1.5       | 101.3                    | 2.0       | 81.0                    | 2.7       | 101.3                    | 1.9       | 96.9                     | 6.6       | 93.6                    | 4.2       |
| 170 | Mepanipyrin             | 0.001 | 0.004 | 1.0000         | 202.1  | 98.6                     | 3.5       | 95.5                     | 2.0       | 81.8                    | 3.4       | 98.4                     | 6.1       | 95.6                     | 13.8      | 90.5                    | 10.3      |
| 171 | Mepronil                | 0.001 | 0.002 | 0.9998         | 454.7  | 117.4                    | 2.7       | 104.4                    | 2.3       | 82.7                    | 3.7       | 98.3                     | 2.7       | 95.6                     | 10.2      | 92.3                    | 6.3       |
| 172 | Metalaxyl               | 0.001 | 0.002 | 0.9992         | 90.0   | 114.3                    | 4.1       | 110.6                    | 2.9       | 97.3                    | 4.1       | 90.6                     | 1.3       | 89.0                     | 10.4      | 85.7                    | 10.5      |
| 173 | Methidathion            | 0.001 | 0.003 | 0.9993         | 307.0  | 86.5                     | 6.7       | 82.6                     | 7.8       | 87.4                    | 2.1       | 98.4                     | 19.1      | 91.8                     | 26.5      | 88.7                    | 19.1      |
| 174 | Methoprotryn            | 0.001 | 0.002 | 0.9998         | 190.1  | 115.6                    | 3.5       | 110.3                    | 2.8       | 82.1                    | 4.4       | 99.5                     | 5.9       | 95.7                     | 12.9      | 93.4                    | 8.0       |
| 175 | Methoxychlor            | 0.002 | 0.005 | 0.9961         | 108.2  | 117.4                    | 3.7       | 78.4                     | 6.3       | 85.2                    | 1.1       | 93.4                     | 12.9      | 92.2                     | 15.8      | 90.5                    | 14.7      |
| 176 | Methyl trithion         | 0.001 | 0.003 | 0.9994         | 268.3  | 113.8                    | 5.3       | 94.6                     | 5.0       | 73.5                    | 3.8       | 95.4                     | 21.3      | 101.9                    | 26.2      | 95.2                    | 16.6      |
| 177 | Metolachlor             | 0.001 | 0.003 | 0.9997         | 109.7  | 97.4                     | 2.0       | 115.8                    | 2.7       | 103.2                   | 3.6       | 95.3                     | 7.9       | 91.7                     | 16.2      | 90.0                    | 10.9      |
| 178 | Metribuzin              | 0.001 | 0.002 | 0.9992         | 117.2  | 116.6                    | 4.4       | 106.7                    | 2.7       | 94.9                    | 4.7       | 91.9                     | 3.7       | 90.5                     | 12.0      | 87.3                    | 13.1      |
| 179 | MGK-264                 | 0.001 | 0.002 | 0.9994         | 92.6   | 112.3                    | 3.8       | 107.0                    | 1.7       | 95.1                    | 3.4       | 98.7                     | 5.1       | 94.8                     | 10.9      | 89.4                    | 8.8       |
| 180 | Molinate                | 0.001 | 0.003 | 0.9979         | 78.2   | 107.2                    | 3.8       | 99.8                     | 3.6       | 105.9                   | 7.0       | 96.3                     | 7.6       | 93.6                     | 11.7      | 85.5                    | 19.0      |
| 181 | Monolinuron             | 0.001 | 0.004 | 0.9989         | 214.3  | 111.3                    | 5.5       | 111.1                    | 6.8       | 94.8                    | 7.7       | 82.4                     | 16.2      | 77.5                     | 25.7      | 82.7                    | 14.0      |
| 182 | Myclobutanil            | 0.001 | 0.002 | 0.9998         | 135.2  | 116.1                    | 3.5       | 116.6                    | 2.8       | 93.8                    | 3.1       | 98.2                     | 2.1       | 96.2                     | 8.5       | 93.5                    | 4.9       |
| 183 | Nitrothal-isopropyl     | 0.001 | 0.004 | 0.9971         | 208.3  | 113.5                    | 6.0       | 107.0                    | 2.5       | 101.7                   | 4.7       | 108.8                    | 9.7       | 100.3                    | 11.5      | 103.0                   | 2.1       |
| 184 | Nonachlor- <i>cis</i>   | 0.001 | 0.002 | 0.9997         | 51.9   | 115.6                    | 3.3       | 104.9                    | 3.8       | 96.6                    | 1.9       | 87.3                     | 27.0      | 92.8                     | 14.3      | 90.6                    | 7.9       |
|     | Nonachlor- <i>trans</i> | 0.001 | 0.002 | 0.9998         | 43.7   | 111.6                    | 3.9       | 98.8                     | 0.6       | 94.3                    | 2.9       | 88.2                     | 25.0      | 93.9                     | 15.6      | 92.5                    | 7.8       |

| No. | Analyte                 | LOD   | LOQ   | R <sup>2</sup> | ME.(%) | Repeatability (n=5)      |           |                          |           |                         |           | Reproducibility (n=11)   |           |                          |           |                         |           |
|-----|-------------------------|-------|-------|----------------|--------|--------------------------|-----------|--------------------------|-----------|-------------------------|-----------|--------------------------|-----------|--------------------------|-----------|-------------------------|-----------|
|     |                         |       |       |                |        | 0.01 mg kg <sup>-1</sup> |           | 0.02 mg kg <sup>-1</sup> |           | 0.1 mg kg <sup>-1</sup> |           | 0.01 mg kg <sup>-1</sup> |           | 0.02 mg kg <sup>-1</sup> |           | 0.1 mg kg <sup>-1</sup> |           |
|     |                         |       |       |                |        | Rec.<br>(%)              | CV<br>(%) | Rec.<br>(%)              | CV<br>(%) | Rec.<br>(%)             | CV<br>(%) | Rec.<br>(%)              | CV<br>(%) | Rec.<br>(%)              | CV<br>(%) | Rec.<br>(%)             | CV<br>(%) |
| 185 | Nuarimol                | 0.001 | 0.002 | 0.9999         | 242.0  | 113.5                    | 1.4       | 104.5                    | 2.0       | 87.1                    | 3.2       | 96.1                     | 5.1       | 95.2                     | 2.8       | 92.1                    | 2.9       |
| 186 | Ortho-phenyl phenol     | 0.001 | 0.003 | 0.9987         | 358.6  | 98.7                     | 8.0       | 97.5                     | 1.9       | 100.8                   | 6.6       | 91.1                     | 11.1      | 82.1                     | 24.6      | 76.1                    | 32.7      |
| 187 | Oxadiazon               | 0.001 | 0.002 | 0.9996         | 105.5  | 117.0                    | 2.4       | 117.0                    | 2.9       | 105.8                   | 2.9       | 97.5                     | 5.7       | 96.4                     | 11.5      | 91.4                    | 6.6       |
| 188 | Oxadixyl                | 0.001 | 0.002 | 0.9998         | 112.0  | 119.4                    | 3.8       | 110.5                    | 3.1       | 114.8                   | 2.7       | 102.3                    | 13.7      | 99.3                     | 18.3      | 97.7                    | 12.7      |
| 189 | Oxyfluorfen             | 0.001 | 0.004 | 0.9989         | 272.7  | 114.8                    | 5.1       | 110.5                    | 2.2       | 83.3                    | 3.9       | 103.0                    | 11.5      | 96.8                     | 15.7      | 99.6                    | 1.2       |
| 190 | Paclobutrazol           | 0.001 | 0.002 | 0.9994         | >500   | 111.6                    | 5.0       | 105.2                    | 2.0       | 80.8                    | 5.9       | 98.4                     | 3.1       | 96.8                     | 6.7       | 93.7                    | 3.8       |
| 191 | Parathion               | 0.001 | 0.004 | 0.9983         | 249.0  | 114.1                    | 4.4       | 109.3                    | 3.5       | 103.0                   | 4.7       | 104.0                    | 9.3       | 93.2                     | 17.8      | 94.8                    | 7.6       |
| 192 | Parathion-methyl        | 0.002 | 0.005 | 0.9984         | 246.8  | 107.6                    | 7.1       | 105.9                    | 3.7       | 84.9                    | 5.3       | 98.0                     | 10.1      | 91.4                     | 20.2      | 94.3                    | 5.5       |
| 193 | Penconazole             | 0.001 | 0.002 | 0.9996         | 104.2  | 112.7                    | 5.4       | 110.9                    | 2.4       | 96.0                    | 3.8       | 97.5                     | 2.0       | 94.4                     | 9.2       | 90.9                    | 6.7       |
| 194 | Pendimethalin           | 0.001 | 0.003 | 0.9978         | 201.0  | 110.8                    | 6.8       | 119.7                    | 2.9       | 95.8                    | 4.3       | 104.3                    | 7.5       | 93.5                     | 13.0      | 96.9                    | 0.6       |
| 195 | Penflufen               | 0.001 | 0.002 | 0.9997         | 249.4  | 116.8                    | 2.9       | 101.8                    | 2.8       | 80.8                    | 3.6       | 97.9                     | 3.3       | 95.6                     | 9.9       | 93.0                    | 4.4       |
| 196 | Pentachlorobenzonitrile | 0.001 | 0.003 | 0.9989         | 81.3   | 102.9                    | 8.3       | 95.4                     | 2.6       | 97.7                    | 3.0       | 90.9                     | 13.6      | 93.3                     | 10.9      | 93.7                    | 3.7       |
| 197 | Penthiopyrad            | 0.001 | 0.002 | 0.9997         | 405.5  | 110.9                    | 2.8       | 103.1                    | 2.2       | 83.4                    | 3.7       | 102.7                    | 2.2       | 99.1                     | 6.5       | 96.8                    | 3.0       |
| 198 | Pentoxazone             | 0.001 | 0.002 | 0.9997         | 192.8  | 116.6                    | 3.3       | 102.5                    | 2.6       | 88.8                    | 1.8       | 100.1                    | 2.1       | 97.3                     | 7.2       | 92.7                    | 3.7       |
| 199 | Permethrin-cis          | 0.001 | 0.004 | 0.9998         | 417.8  | 113.8                    | 4.3       | 113.7                    | 5.4       | 105.5                   | 2.6       | 106.9                    | 11.7      | 96.1                     | 9.7       | 91.4                    | 3.2       |
|     | Permethrin-trans        | 0.001 | 0.002 | 0.9995         | 369.7  | 97.0                     | 5.1       | 93.3                     | 9.3       | 85.3                    | 1.5       | 108.9                    | 5.8       | 97.8                     | 7.6       | 94.7                    | 3.3       |
| 200 | Perthane                | 0.001 | 0.002 | 0.9995         | 93.8   | 115.7                    | 3.5       | 103.9                    | 4.2       | 86.9                    | 2.7       | 96.9                     | 8.5       | 94.4                     | 15.5      | 91.1                    | 8.8       |
| 201 | Phenthoate              | 0.002 | 0.005 | 0.9991         | 144.7  | 111.4                    | 7.4       | 106.6                    | 2.8       | 86.4                    | 4.6       | 99.4                     | 11.7      | 92.9                     | 20.8      | 89.7                    | 12.6      |
| 202 | Phosphamidon (E)        | 0.001 | 0.004 | 0.9987         | >500   | 106.7                    | 10.3      | 103.2                    | 15.2      | 82.4                    | 5.8       | 85.8                     | 10.9      | 79.7                     | 12.3      | 88.0                    | 13.2      |
|     | Phosphamidon (Z)        | 0.002 | 0.007 | 0.9990         | 416.5  | 110.6                    | 10.3      | 89.5                     | 9.1       | 85.0                    | 7.6       | 90.8                     | 13.7      | 81.8                     | 13.4      | 85.7                    | 10.2      |
| 203 | Phosalone               | 0.001 | 0.004 | 0.9991         | >500   | 113.5                    | 3.8       | 95.8                     | 5.0       | 79.0                    | 2.5       | 89.6                     | 11.1      | 98.8                     | 21.1      | 98.4                    | 10.0      |
| 204 | Phosmet                 | 0.001 | 0.004 | 0.9992         | 236.8  | 106.7                    | 9.9       | 87.3                     | 3.8       | 74.4                    | 2.6       | 98.7                     | 19.8      | 79.4                     | 11.3      | 100.8                   | 16.7      |
| 205 | Picoxystrobin           | 0.001 | 0.003 | 0.9999         | 148.3  | 114.3                    | 3.9       | 113.7                    | 2.2       | 86.2                    | 2.4       | 98.0                     | 4.1       | 95.8                     | 11.3      | 91.6                    | 7.1       |

| No. | Analyte               | LOD   | LOQ   | R <sup>2</sup> | ME.(%) | Repeatability (n=5)      |           |                          |           |                         |           | Reproducibility (n=11)   |           |                          |           |                         |           |
|-----|-----------------------|-------|-------|----------------|--------|--------------------------|-----------|--------------------------|-----------|-------------------------|-----------|--------------------------|-----------|--------------------------|-----------|-------------------------|-----------|
|     |                       |       |       |                |        | 0.01 mg kg <sup>-1</sup> |           | 0.02 mg kg <sup>-1</sup> |           | 0.1 mg kg <sup>-1</sup> |           | 0.01 mg kg <sup>-1</sup> |           | 0.02 mg kg <sup>-1</sup> |           | 0.1 mg kg <sup>-1</sup> |           |
|     |                       |       |       |                |        | Rec.<br>(%)              | CV<br>(%) | Rec.<br>(%)              | CV<br>(%) | Rec.<br>(%)             | CV<br>(%) | Rec.<br>(%)              | CV<br>(%) | Rec.<br>(%)              | CV<br>(%) | Rec.<br>(%)             | CV<br>(%) |
| 206 | Piperonyl butoxide    | 0.001 | 0.002 | 0.9996         | 364.4  | 108.3                    | 1.2       | 102.1                    | 2.5       | 80.7                    | 3.3       | 98.8                     | 9.2       | 94.1                     | 13.4      | 91.9                    | 6.6       |
| 207 | Pirimicarb            | 0.001 | 0.002 | 0.9989         | 132.2  | 110.2                    | 5.1       | 104.8                    | 2.8       | 98.7                    | 5.3       | 90.6                     | 10.5      | 89.3                     | 9.9       | 92.3                    | 1.0       |
| 208 | Pirimiphos-ethyl      | 0.001 | 0.002 | 0.9982         | 115.8  | 111.1                    | 4.6       | 112.4                    | 1.8       | 95.0                    | 4.1       | 94.5                     | 8.2       | 93.5                     | 14.7      | 91.0                    | 7.0       |
| 209 | Pirimiphos-methyl     | 0.001 | 0.002 | 0.9990         | 154.3  | 108.2                    | 3.6       | 106.3                    | 2.2       | 97.8                    | 3.9       | 90.4                     | 11.7      | 89.6                     | 11.1      | 86.2                    | 13.2      |
| 210 | Pretilachlor          | 0.001 | 0.004 | 0.9998         | 162.7  | 97.2                     | 1.5       | 108.6                    | 4.8       | 100.9                   | 3.2       | 98.1                     | 9.7       | 98.3                     | 16.0      | 98.1                    | 11.2      |
| 211 | Prochloraz            | 0.001 | 0.003 | 0.9982         | >500   | 97.1                     | 5.6       | 82.6                     | 1.2       | 97.7                    | 4.2       | 93.1                     | 26.6      | 88.0                     | 39.5      | 92.9                    | 18.7      |
|     | 2,4,6-trichlorophenol | 0.001 | 0.002 | 0.9985         | 233.7  | 80.7                     | 12.8      | 95.7                     | 5.3       | 94.0                    | 5.1       | 86.9                     | 10.0      | 83.5                     | 23.0      | 78.1                    | 25.5      |
| 212 | Procymidone           | 0.001 | 0.002 | 0.9995         | 72.4   | 115.8                    | 4.1       | 104.1                    | 3.1       | 92.3                    | 3.7       | 94.2                     | 8.3       | 94.5                     | 12.1      | 89.1                    | 8.7       |
| 213 | Prodiamine            | 0.001 | 0.003 | 0.9981         | 201.0  | 113.5                    | 4.4       | 119.0                    | 2.5       | 103.1                   | 4.7       | 98.8                     | 2.4       | 95.8                     | 11.8      | 95.3                    | 1.6       |
| 214 | Profenofos            | 0.001 | 0.003 | 0.9995         | >500   | 116.1                    | 3.5       | 105.1                    | 3.0       | 90.0                    | 5.9       | 91.8                     | 7.4       | 88.9                     | 13.8      | 86.0                    | 7.6       |
| 215 | Profluralin           | 0.001 | 0.004 | 0.9971         | 118.3  | 108.9                    | 2.5       | 115.3                    | 4.2       | 105.5                   | 4.8       | 101.7                    | 2.7       | 97.7                     | 9.9       | 95.5                    | 6.4       |
| 216 | Prohydrojasmon        | 0.001 | 0.004 | 0.9984         | 144.8  | 107.4                    | 5.4       | 113.7                    | 3.0       | 101.6                   | 3.4       | 95.1                     | 10.3      | 90.2                     | 16.7      | 92.0                    | 3.4       |
| 217 | Prometon              | 0.001 | 0.002 | 0.9990         | 168.0  | 112.3                    | 4.1       | 108.7                    | 2.3       | 101.1                   | 4.8       | 92.4                     | 8.9       | 89.4                     | 18.4      | 92.7                    | 3.9       |
| 218 | Prometryn             | 0.001 | 0.002 | 0.9992         | 106.9  | 106.9                    | 5.9       | 104.7                    | 2.4       | 95.8                    | 3.7       | 91.2                     | 3.3       | 91.3                     | 10.0      | 86.8                    | 10.6      |
| 219 | Propachlor            | 0.001 | 0.003 | 0.9989         | 131.6  | 102.3                    | 4.0       | 110.6                    | 2.5       | 115.0                   | 2.5       | 88.1                     | 20.9      | 95.1                     | 13.4      | 97.2                    | 7.3       |
| 220 | Propanil              | 0.001 | 0.003 | 0.9995         | 181.1  | 113.0                    | 5.2       | 112.2                    | 4.8       | 97.3                    | 4.4       | 94.6                     | 7.0       | 90.7                     | 10.2      | 89.8                    | 4.3       |
| 221 | Propazine             | 0.001 | 0.002 | 0.9987         | 104.7  | 110.5                    | 3.8       | 102.0                    | 1.9       | 96.6                    | 4.5       | 91.1                     | 13.0      | 90.1                     | 11.3      | 90.3                    | 3.3       |
| 222 | Propetamphos          | 0.001 | 0.003 | 0.9979         | 154.9  | 108.6                    | 6.0       | 107.9                    | 2.6       | 98.9                    | 5.9       | 90.8                     | 11.0      | 97.5                     | 0.7       | 91.9                    | 2.2       |
| 223 | Propham               | 0.001 | 0.003 | 0.9994         | 187.5  | 94.6                     | 8.0       | 103.2                    | 10.7      | 108.8                   | 7.3       | 83.9                     | 12.3      | 87.2                     | 11.7      | 90.6                    | 5.3       |
| 224 | Propiconazole-1       | 0.001 | 0.002 | 0.9996         | 168.8  | 111.6                    | 2.4       | 104.5                    | 3.2       | 86.0                    | 3.1       | 93.9                     | 4.2       | 94.8                     | 5.9       | 93.4                    | 4.0       |
|     | Propiconazole-2       | 0.001 | 0.002 | 0.9999         | 176.9  | 116.7                    | 5.3       | 105.5                    | 2.4       | 88.0                    | 2.4       | 97.6                     | 2.1       | 97.1                     | 7.2       | 92.9                    | 4.8       |
| 225 | Propisochlor          | 0.001 | 0.002 | 0.9983         | 89.9   | 112.5                    | 1.7       | 117.3                    | 3.5       | 108.0                   | 3.3       | 103.4                    | 8.9       | 95.7                     | 11.0      | 88.5                    | 11.2      |
| 226 | Propyzamide           | 0.001 | 0.002 | 0.9990         | 137.1  | 96.9                     | 2.2       | 111.1                    | 1.4       | 99.8                    | 4.1       | 90.4                     | 8.7       | 91.6                     | 14.3      | 93.1                    | 3.2       |

| No. | Analyte                | LOD   | LOQ   | R <sup>2</sup> | ME.(%) | Repeatability (n=5)      |           |                          |           |                         |           | Reproducibility (n=11)   |           |                          |           |                         |           |
|-----|------------------------|-------|-------|----------------|--------|--------------------------|-----------|--------------------------|-----------|-------------------------|-----------|--------------------------|-----------|--------------------------|-----------|-------------------------|-----------|
|     |                        |       |       |                |        | 0.01 mg kg <sup>-1</sup> |           | 0.02 mg kg <sup>-1</sup> |           | 0.1 mg kg <sup>-1</sup> |           | 0.01 mg kg <sup>-1</sup> |           | 0.02 mg kg <sup>-1</sup> |           | 0.1 mg kg <sup>-1</sup> |           |
|     |                        |       |       |                |        | Rec.<br>(%)              | CV<br>(%) | Rec.<br>(%)              | CV<br>(%) | Rec.<br>(%)             | CV<br>(%) | Rec.<br>(%)              | CV<br>(%) | Rec.<br>(%)              | CV<br>(%) | Rec.<br>(%)             | CV<br>(%) |
| 227 | Prothiofos             | 0.001 | 0.002 | 0.9996         | 167.3  | 110.5                    | 7.8       | 110.8                    | 3.7       | 110.0                   | 2.3       | 92.7                     | 7.7       | 88.0                     | 13.6      | 85.5                    | 8.7       |
| 228 | Pyracarbolid           | 0.002 | 0.007 | 0.9999         | 222.9  | 114.7                    | 2.1       | 111.4                    | 4.8       | 100.2                   | 5.1       | 87.9                     | 17.2      | 87.8                     | 13.9      | 88.4                    | 8.6       |
| 229 | Pyraclofos             | 0.002 | 0.005 | 0.9995         | >500   | 110.9                    | 4.5       | 103.9                    | 3.7       | 94.5                    | 3.4       | 82.3                     | 6.6       | 78.0                     | 9.3       | 94.5                    | 24.0      |
| 230 | Pyraflufen-ethyl       | 0.001 | 0.002 | 0.9998         | 216.9  | 110.9                    | 1.0       | 100.6                    | 2.5       | 77.4                    | 3.6       | 98.0                     | 4.3       | 94.6                     | 9.3       | 90.6                    | 4.3       |
| 231 | Pyrazophos             | 0.001 | 0.003 | 0.9986         | 416.8  | 114.0                    | 4.3       | 90.4                     | 1.1       | 71.6                    | 3.4       | 101.0                    | 18.2      | 95.0                     | 23.7      | 96.0                    | 7.9       |
| 232 | Pyridalyl              | 0.001 | 0.004 | 0.9995         | >500   | 109.9                    | 3.3       | 94.1                     | 0.6       | 77.2                    | 2.3       | 102.3                    | 3.8       | 96.9                     | 9.4       | 96.8                    | 4.6       |
| 233 | PyrifenoX              | 0.001 | 0.002 | 0.9995         | 127.0  | 109.4                    | 4.3       | 101.6                    | 1.5       | 84.9                    | 4.4       | 100.5                    | 2.3       | 93.0                     | 11.0      | 91.1                    | 8.6       |
| 234 | Pyrifthalid            | 0.001 | 0.002 | 0.9994         | 380.1  | 110.0                    | 2.4       | 98.1                     | 2.5       | 79.4                    | 3.0       | 96.3                     | 13.3      | 91.2                     | 18.9      | 90.7                    | 9.3       |
| 235 | Pyrimethanil           | 0.001 | 0.002 | 0.9990         | 125.4  | 108.5                    | 3.3       | 105.6                    | 2.0       | 99.9                    | 4.7       | 91.5                     | 10.2      | 88.0                     | 15.7      | 91.6                    | 3.7       |
| 236 | Pyriminobac-methyl (E) | 0.001 | 0.003 | 0.9997         | 195.8  | 109.2                    | 2.5       | 101.0                    | 2.2       | 79.0                    | 3.8       | 97.1                     | 8.0       | 94.6                     | 13.4      | 93.6                    | 5.4       |
|     | Pyriminobac-methyl (Z) | 0.001 | 0.002 | 0.9994         | 121.6  | 111.7                    | 2.1       | 107.0                    | 2.6       | 88.0                    | 3.2       | 97.1                     | 6.0       | 94.9                     | 13.6      | 93.3                    | 6.0       |
| 237 | Quinalphos             | 0.003 | 0.009 | 0.9996         | 137.0  | 96.5                     | 4.5       | 109.7                    | 3.4       | 90.7                    | 4.4       | 96.8                     | 8.7       | 90.5                     | 17.1      | 88.1                    | 12.0      |
| 238 | Quinoxifen             | 0.001 | 0.002 | 0.9998         | 85.9   | 115.0                    | 3.2       | 101.6                    | 2.8       | 84.7                    | 2.3       | 94.7                     | 3.6       | 93.0                     | 9.1       | 88.6                    | 6.0       |
| 239 | Quintozene             | 0.002 | 0.005 | 0.9988         | 104.2  | 100.8                    | 7.6       | 119.4                    | 7.7       | 116.5                   | 5.6       | 99.9                     | 16.7      | 94.8                     | 17.1      | 93.1                    | 9.4       |
| 240 | Quizalofop-ethyl       | 0.001 | 0.003 | 0.9994         | 461.7  | 106.9                    | 2.5       | 94.6                     | 0.8       | 78.5                    | 2.2       | 98.7                     | 1.4       | 99.5                     | 0.4       | 92.3                    | 0.5       |
| 241 | Silafluofen            | 0.001 | 0.002 | 0.9993         | 282.6  | 116.8                    | 2.2       | 92.3                     | 1.9       | 80.8                    | 1.9       | 97.9                     | 6.6       | 94.2                     | 10.4      | 95.5                    | 3.1       |
| 242 | Simeconazole           | 0.001 | 0.003 | 0.9994         | 198.4  | 114.6                    | 3.4       | 119.9                    | 1.9       | 105.4                   | 4.0       | 94.8                     | 1.6       | 93.2                     | 10.1      | 90.0                    | 9.2       |
| 243 | Simetryn               | 0.001 | 0.002 | 0.9993         | 129.0  | 110.1                    | 1.5       | 111.5                    | 2.1       | 97.2                    | 4.2       | 90.4                     | 3.0       | 90.0                     | 11.7      | 87.0                    | 14.5      |
| 244 | Spiromesifen           | 0.001 | 0.003 | 0.9994         | 203.2  | 110.0                    | 4.1       | 88.9                     | 7.6       | 75.3                    | 3.2       | 104.6                    | 11.4      | 103.5                    | 13.4      | 101.8                   | 11.6      |
| 245 | Spiroxamine-1          | 0.002 | 0.006 | 0.9974         | 181.5  | 103.1                    | 15.2      | 91.6                     | 4.1       | 97.7                    | 6.0       | 93.9                     | 4.4       | 93.7                     | 9.0       | 92.7                    | 14.3      |
|     | Spiroxamine-2          | 0.001 | 0.002 | 0.9946         | 149.4  | 114.3                    | 9.9       | 107.3                    | 6.6       | 97.5                    | 3.0       | 98.4                     | 11.0      | 95.8                     | 11.4      | 93.9                    | 15.9      |
| 246 | Sulfotep               | 0.001 | 0.002 | 0.9983         | 112.2  | 112.0                    | 5.1       | 111.0                    | 1.5       | 108.6                   | 4.5       | 92.4                     | 9.2       | 89.6                     | 18.2      | 85.5                    | 15.9      |
| 247 | Tebuconazole           | 0.001 | 0.003 | 0.9997         | 406.9  | 113.9                    | 2.7       | 105.4                    | 2.0       | 82.8                    | 3.2       | 97.9                     | 0.9       | 95.2                     | 4.7       | 93.9                    | 2.0       |

| No. | Analyte           | LOD   | LOQ   | R <sup>2</sup> | ME.(%) | Repeatability (n=5)      |           |                          |           |                         |           | Reproducibility (n=11)   |           |                          |           |                         |           |
|-----|-------------------|-------|-------|----------------|--------|--------------------------|-----------|--------------------------|-----------|-------------------------|-----------|--------------------------|-----------|--------------------------|-----------|-------------------------|-----------|
|     |                   |       |       |                |        | 0.01 mg kg <sup>-1</sup> |           | 0.02 mg kg <sup>-1</sup> |           | 0.1 mg kg <sup>-1</sup> |           | 0.01 mg kg <sup>-1</sup> |           | 0.02 mg kg <sup>-1</sup> |           | 0.1 mg kg <sup>-1</sup> |           |
|     |                   |       |       |                |        | Rec.<br>(%)              | CV<br>(%) | Rec.<br>(%)              | CV<br>(%) | Rec.<br>(%)             | CV<br>(%) | Rec.<br>(%)              | CV<br>(%) | Rec.<br>(%)              | CV<br>(%) | Rec.<br>(%)             | CV<br>(%) |
| 248 | Tebufenpyrad      | 0.001 | 0.002 | 0.9995         | 217.1  | 117.8                    | 3.5       | 98.5                     | 2.2       | 82.8                    | 2.7       | 98.4                     | 4.6       | 97.2                     | 8.2       | 92.2                    | 3.8       |
| 249 | Tebupirimfos      | 0.001 | 0.003 | 0.9991         | 106.8  | 111.9                    | 5.4       | 104.0                    | 2.8       | 102.0                   | 3.2       | 93.4                     | 5.4       | 90.1                     | 12.2      | 86.2                    | 12.0      |
| 250 | Tecnazene         | 0.001 | 0.004 | 0.9978         | 98.8   | 97.0                     | 4.8       | 105.3                    | 3.7       | 107.1                   | 4.6       | 99.8                     | 5.3       | 93.5                     | 15.1      | 97.2                    | 3.9       |
| 251 | Tefluthrin        | 0.001 | 0.002 | 0.9981         | 71.0   | 110.1                    | 5.1       | 103.9                    | 4.9       | 105.3                   | 3.6       | 96.4                     | 2.8       | 95.6                     | 8.7       | 87.8                    | 11.6      |
| 252 | Terbacil          | 0.001 | 0.003 | 0.9995         | 387.5  | 112.4                    | 5.1       | 114.5                    | 1.8       | 94.9                    | 4.7       | 94.0                     | 15.1      | 86.5                     | 18.6      | 89.9                    | 10.8      |
| 253 | Terbumeton        | 0.001 | 0.002 | 0.9989         | 132.8  | 108.4                    | 5.5       | 107.8                    | 2.1       | 99.3                    | 4.6       | 89.8                     | 7.9       | 87.8                     | 17.2      | 91.9                    | 3.3       |
| 254 | Terbutryn         | 0.003 | 0.009 | 0.9993         | 127.6  | 113.7                    | 4.6       | 110.3                    | 2.9       | 97.2                    | 3.9       | 95.0                     | 3.4       | 92.0                     | 9.9       | 87.6                    | 9.0       |
| 255 | Tetrachlorvinphos | 0.002 | 0.005 | 0.9992         | 421.5  | 108.6                    | 8.0       | 114.8                    | 4.8       | 78.3                    | 2.0       | 92.7                     | 8.0       | 87.6                     | 15.1      | 87.2                    | 0.4       |
| 256 | Tetraconazole     | 0.001 | 0.003 | 0.9995         | 119.8  | 116.8                    | 0.9       | 112.1                    | 1.7       | 96.8                    | 3.4       | 97.5                     | 2.6       | 96.1                     | 11.1      | 91.9                    | 4.6       |
| 257 | Tetradifon        | 0.001 | 0.002 | 0.9998         | 102.7  | 117.4                    | 4.0       | 105.7                    | 2.2       | 93.7                    | 1.1       | 96.3                     | 6.0       | 97.6                     | 13.0      | 90.9                    | 8.8       |
| 258 | Tetramethrin-1    | 0.001 | 0.003 | 0.9997         | >500   | 115.5                    | 6.3       | 77.7                     | 6.3       | 70.0                    | 3.7       | 102.3                    | 8.2       | 100.3                    | 13.9      | 97.2                    | 6.2       |
|     | Tetramethrin-2    | 0.001 | 0.004 | 0.9997         | 399.9  | 114.3                    | 3.7       | 106.9                    | 2.9       | 73.4                    | 3.6       | 117.9                    | 13.1      | 127.7                    | 20.9      | 133.6                   | 29.4      |
| 259 | Thifluzamide      | 0.001 | 0.002 | 0.9997         | 427.9  | 116.8                    | 3.3       | 110.3                    | 2.5       | 80.8                    | 4.5       | 100.2                    | 3.1       | 97.4                     | 8.8       | 95.6                    | 5.2       |
| 260 | Thiometon         | 0.001 | 0.004 | 0.9995         | 152.0  | 109.7                    | 0.9       | 103.7                    | 3.6       | 102.2                   | 6.5       | 86.6                     | 10.5      | 88.8                     | 11.5      | 92.4                    | 3.1       |
| 261 | Thionazin         | 0.001 | 0.003 | 0.9983         | 116.4  | 111.7                    | 0.7       | 102.3                    | 1.8       | 106.8                   | 5.9       | 88.3                     | 10.1      | 88.1                     | 8.8       | 91.3                    | 3.6       |
| 262 | Tolclofos-methyl  | 0.001 | 0.002 | 0.9986         | 93.1   | 112.9                    | 4.1       | 106.1                    | 2.8       | 99.4                    | 3.5       | 90.1                     | 11.4      | 93.2                     | 10.0      | 92.9                    | 3.9       |
| 263 | Triadimefon       | 0.001 | 0.002 | 0.9994         | 110.5  | 115.6                    | 2.7       | 112.6                    | 2.1       | 97.8                    | 4.2       | 97.8                     | 2.3       | 95.3                     | 12.3      | 94.3                    | 8.9       |
| 264 | Triadimenol       | 0.001 | 0.003 | 0.9998         | 267.3  | 113.7                    | 3.9       | 110.2                    | 1.1       | 94.5                    | 4.2       | 99.9                     | 5.2       | 93.6                     | 7.8       | 96.5                    | 3.8       |
| 265 | Tri-allate        | 0.001 | 0.003 | 0.9989         | 90.3   | 104.8                    | 6.3       | 105.8                    | 3.4       | 104.1                   | 2.9       | 94.2                     | 3.2       | 90.5                     | 11.5      | 84.8                    | 13.0      |
| 266 | Triazophos        | 0.001 | 0.003 | 0.9994         | 374.3  | 114.1                    | 5.5       | 100.7                    | 3.7       | 82.0                    | 3.3       | 100.7                    | 21.1      | 93.5                     | 24.7      | 93.1                    | 16.1      |
| 267 | Tridiphane        | 0.003 | 0.008 | 0.9988         | 70.4   | 107.1                    | 6.0       | 96.2                     | 4.3       | 86.0                    | 4.9       | 90.8                     | 6.1       | 86.9                     | 16.2      | 87.3                    | 17.7      |
| 268 | Trifloxystrobin   | 0.001 | 0.002 | 0.9996         | 158.5  | 116.9                    | 2.2       | 103.5                    | 2.6       | 82.3                    | 2.9       | 98.0                     | 5.8       | 96.5                     | 10.6      | 96.1                    | 1.7       |
| 269 | Triflumizole      | 0.001 | 0.003 | 0.9997         | 142.4  | 111.5                    | 4.1       | 104.5                    | 1.2       | 88.0                    | 3.4       | 96.7                     | 3.3       | 92.2                     | 10.0      | 90.4                    | 5.9       |

| No. | Analyte     | LOD   | LOQ   | R <sup>2</sup> | ME.(%) | Repeatability (n=5)      |           |                          |           |                         |           | Reproducibility (n=11)   |           |                          |           |                         |           |
|-----|-------------|-------|-------|----------------|--------|--------------------------|-----------|--------------------------|-----------|-------------------------|-----------|--------------------------|-----------|--------------------------|-----------|-------------------------|-----------|
|     |             |       |       |                |        | 0.01 mg kg <sup>-1</sup> |           | 0.02 mg kg <sup>-1</sup> |           | 0.1 mg kg <sup>-1</sup> |           | 0.01 mg kg <sup>-1</sup> |           | 0.02 mg kg <sup>-1</sup> |           | 0.1 mg kg <sup>-1</sup> |           |
|     |             |       |       |                |        | Rec.<br>(%)              | CV<br>(%) | Rec.<br>(%)              | CV<br>(%) | Rec.<br>(%)             | CV<br>(%) | Rec.<br>(%)              | CV<br>(%) | Rec.<br>(%)              | CV<br>(%) | Rec.<br>(%)             | CV<br>(%) |
| 270 | Trifluralin | 0.001 | 0.004 | 0.9980         | 133.4  | 107.8                    | 7.4       | 111.6                    | 3.8       | 111.4                   | 5.7       | 101.7                    | 1.8       | 95.2                     | 8.3       | 92.8                    | 7.3       |
| 271 | Vinclozolin | 0.001 | 0.002 | 0.9999         | 73.6   | 109.4                    | 4.8       | 111.3                    | 2.7       | 103.3                   | 3.7       | 93.9                     | 6.8       | 89.5                     | 15.8      | 92.8                    | 5.0       |
| 272 | Zoxamide    | 0.002 | 0.005 | 0.9993         | >500   | 104.3                    | 5.3       | 106.5                    | 5.0       | 72.1                    | 1.4       | 98.8                     | 4.4       | 94.7                     | 2.0       | 87.8                    | 6.5       |

Table S6. Method validation parameter of 272 pesticides in green pepper.

| No. | Analyte           | LOD   | LOQ   | R <sup>2</sup> | ME.(%) | Repeatability (n=5)      |           |                          |           |                         |           | Reproducibility (n=11)   |           |                          |           |                         |           |
|-----|-------------------|-------|-------|----------------|--------|--------------------------|-----------|--------------------------|-----------|-------------------------|-----------|--------------------------|-----------|--------------------------|-----------|-------------------------|-----------|
|     |                   |       |       |                |        | 0.01 mg kg <sup>-1</sup> |           | 0.02 mg kg <sup>-1</sup> |           | 0.1 mg kg <sup>-1</sup> |           | 0.01 mg kg <sup>-1</sup> |           | 0.02 mg kg <sup>-1</sup> |           | 0.1 mg kg <sup>-1</sup> |           |
|     |                   |       |       |                |        | Rec.<br>(%)              | CV<br>(%) | Rec.<br>(%)              | CV<br>(%) | Rec.<br>(%)             | CV<br>(%) | Rec.<br>(%)              | CV<br>(%) | Rec.<br>(%)              | CV<br>(%) | Rec.<br>(%)             | CV<br>(%) |
| 1   | 2,6-DIPN          | 0.003 | 0.008 | 0.9974         | 95.7   | 122.7                    | 10.8      | 166.2                    | 12.1      | 96.4                    | 8.4       | 142.7                    | 6.9       | 108.7                    | 4.9       | 91.9                    | 5.1       |
| 2   | Acetochlor        | 0.001 | 0.004 | 0.9995         | 79.6   | 101.6                    | 3.0       | 111.1                    | 2.5       | 105.8                   | 5.0       | 96.8                     | 3.1       | 98.2                     | 5.7       | 96.2                    | 1.8       |
|     | EMA               | 0.003 | 0.008 | 0.9977         | 38.5   | 56.1                     | 25.3      | 105.8                    | 9.8       | 89.3                    | 18.1      | 91.7                     | 25.1      | 91.3                     | 22.5      | 87.2                    | 8.6       |
|     | HEMA              | 0.002 | 0.005 | 0.9995         | 454.9  | 35.2                     | 9.7       | 81.1                     | 10.3      | 64.1                    | 6.3       | 37.6                     | 46.5      | 47.2                     | 60.1      | 47.2                    | 60.8      |
| 3   | Acrinathrin       | 0.001 | 0.004 | 0.9992         | >500   | 450.8                    | 7.7       | 96.2                     | 4.3       | 89.9                    | 1.5       | 60.3                     | 92.0      | 83.9                     | 21.8      | 93.7                    | 12.0      |
| 4   | Alachlor          | 0.001 | 0.003 | 0.9992         | 70.4   | 99.4                     | 3.1       | 111.7                    | 1.7       | 105.4                   | 4.3       | 93.9                     | 6.6       | 95.5                     | 1.4       | 93.5                    | 5.0       |
| 5   | Aldrin            | 0.001 | 0.003 | 0.9981         | 54.1   | 84.8                     | 3.1       | 101.6                    | 1.7       | 101.8                   | 5.5       | 90.4                     | 0.2       | 89.7                     | 5.5       | 88.9                    | 9.0       |
|     | Dieldrin          | 0.001 | 0.004 | 0.9999         | 32.6   | 90.2                     | 2.3       | 116.7                    | 2.4       | 107.6                   | 3.3       | 88.4                     | 12.2      | 92.7                     | 7.5       | 91.0                    | 5.4       |
| 6   | Allidochlor       | 0.002 | 0.007 | 0.9983         | 73.4   | 104.1                    | 5.3       | 118.1                    | 2.3       | 97.6                    | 13.5      | 96.4                     | 6.7       | 98.6                     | 7.3       | 100.1                   | 7.6       |
| 7   | Ametryn           | 0.001 | 0.002 | 0.9993         | 110.0  | 88.2                     | 2.9       | 104.0                    | 2.9       | 100.2                   | 3.1       | 94.5                     | 6.8       | 92.9                     | 4.3       | 91.6                    | 3.1       |
| 8   | Anilofos          | 0.001 | 0.004 | 0.9994         | >500   | 103.2                    | 8.7       | 93.4                     | 4.6       | 83.9                    | 2.1       | 84.5                     | 10.1      | 87.4                     | 8.3       | 83.1                    | 4.9       |
| 9   | Aramite           | 0.001 | 0.004 | 0.9999         | 112.4  | 114.6                    | 2.9       | 111.2                    | 3.8       | 108.0                   | 1.1       | 91.7                     | 11.3      | 95.3                     | 0.6       | 94.3                    | 2.1       |
| 10  | Aspon             | 0.001 | 0.004 | 0.9995         | 107.5  | 104.4                    | 3.1       | 116.2                    | 1.9       | 110.0                   | 3.8       | 92.3                     | 6.9       | 93.9                     | 5.0       | 92.5                    | 3.9       |
| 11  | Atrazine          | 0.001 | 0.004 | 0.9986         | 112.1  | 95.7                     | 2.5       | 111.3                    | 1.4       | 104.8                   | 5.4       | 93.9                     | 7.4       | 91.1                     | 3.8       | 92.5                    | 4.3       |
| 12  | Azaconazole       | 0.001 | 0.003 | 1.0000         | 61.1   | 101.0                    | 3.2       | 112.8                    | 4.1       | 108.8                   | 1.8       | 93.4                     | 7.0       | 94.7                     | 3.7       | 93.4                    | 3.8       |
| 13  | Benfluralin       | 0.001 | 0.003 | 0.9990         | 52.5   | 99.9                     | 2.9       | 108.0                    | 4.1       | 102.7                   | 9.1       | 102.4                    | 5.5       | 96.0                     | 3.6       | 99.4                    | 3.2       |
| 14  | Benfuresate       | 0.001 | 0.002 | 0.9995         | 47.3   | 90.1                     | 2.4       | 114.8                    | 0.3       | 108.3                   | 3.8       | 92.7                     | 8.3       | 94.6                     | 3.7       | 93.8                    | 4.2       |
| 15  | Benodanil         | 0.001 | 0.003 | 0.9998         | 182.9  | 116.0                    | 4.2       | 111.1                    | 5.3       | 106.4                   | 1.7       | 90.6                     | 11.6      | 93.1                     | 3.2       | 92.4                    | 3.6       |
| 16  | Benzoylprop-ethyl | 0.002 | 0.005 | 0.9999         | 91.6   | 91.4                     | 2.5       | 112.5                    | 5.0       | 105.8                   | 1.9       | 104.7                    | 4.2       | 99.2                     | 4.6       | 92.1                    | 4.1       |
| 17  | BHC, $\alpha$ -   | 0.002 | 0.005 | 0.9997         | 48.8   | 118.5                    | 2.8       | 119.9                    | 4.2       | 104.4                   | 6.8       | 95.4                     | 16.1      | 93.9                     | 12.5      | 88.3                    | 9.3       |
|     | BHC, $\beta$ -    | 0.001 | 0.002 | 0.9992         | 36.1   | 90.0                     | 6.0       | 115.5                    | 1.4       | 106.3                   | 3.9       | 92.6                     | 7.7       | 88.2                     | 2.0       | 92.4                    | 19.2      |

| No. | Analyte               | LOD   | LOQ   | R <sup>2</sup> | ME.(%) | Repeatability (n=5)      |           |                          |           |                         |           | Reproducibility (n=11)   |           |                          |           |                         |           |
|-----|-----------------------|-------|-------|----------------|--------|--------------------------|-----------|--------------------------|-----------|-------------------------|-----------|--------------------------|-----------|--------------------------|-----------|-------------------------|-----------|
|     |                       |       |       |                |        | 0.01 mg kg <sup>-1</sup> |           | 0.02 mg kg <sup>-1</sup> |           | 0.1 mg kg <sup>-1</sup> |           | 0.01 mg kg <sup>-1</sup> |           | 0.02 mg kg <sup>-1</sup> |           | 0.1 mg kg <sup>-1</sup> |           |
|     |                       |       |       |                |        | Rec.<br>(%)              | CV<br>(%) | Rec.<br>(%)              | CV<br>(%) | Rec.<br>(%)             | CV<br>(%) | Rec.<br>(%)              | CV<br>(%) | Rec.<br>(%)              | CV<br>(%) | Rec.<br>(%)             | CV<br>(%) |
|     | BHC, $\delta$ -       | 0.001 | 0.004 | 0.9999         | 38.3   | 119.8                    | 3.6       | 106.0                    | 4.1       | 95.0                    | 3.7       | 84.0                     | 8.7       | 89.2                     | 7.7       | 85.7                    | 5.8       |
| 18  | BHC, $\gamma$ -       | 0.002 | 0.005 | 0.9995         | 36.1   | 115.0                    | 8.6       | 115.1                    | 1.8       | 101.7                   | 9.4       | 95.2                     | 22.2      | 89.5                     | 10.9      | 92.7                    | 22.6      |
| 19  | Bifentox              | 0.001 | 0.003 | 0.9994         | 207.4  | 183.9                    | 11.4      | 108.4                    | 4.7       | 102.4                   | 0.7       | 105.6                    | 5.6       | 102.0                    | 5.8       | 94.4                    | 7.0       |
| 20  | Bifenthrin            | 0.001 | 0.004 | 1.0000         | 145.5  | 89.3                     | 2.1       | 108.3                    | 5.3       | 102.5                   | 1.7       | 92.1                     | 6.5       | 93.7                     | 6.4       | 91.6                    | 5.6       |
| 21  | Boscalid              | 0.001 | 0.004 | 0.9998         | 322.1  | 106.0                    | 4.1       | 107.8                    | 5.8       | 104.0                   | 0.9       | 90.1                     | 8.4       | 91.5                     | 3.6       | 90.6                    | 0.7       |
| 22  | Bromobutide           | 0.001 | 0.003 | 0.9985         | 54.5   | 85.9                     | 4.3       | 107.0                    | 4.0       | 105.1                   | 4.9       | 89.0                     | 2.4       | 92.0                     | 5.2       | 95.1                    | 9.5       |
| 23  | Bromophos-methyl      | 0.001 | 0.003 | 0.9998         | 92.5   | 114.6                    | 4.0       | 109.2                    | 3.6       | 105.6                   | 2.2       | 86.0                     | 9.0       | 89.5                     | 1.3       | 86.9                    | 3.9       |
| 24  | Bromophos-ethyl       | 0.001 | 0.004 | 0.9995         | 93.7   | 100.2                    | 3.1       | 108.7                    | 1.5       | 104.5                   | 2.8       | 89.7                     | 5.9       | 95.2                     | 0.3       | 90.2                    | 5.1       |
| 25  | Bromopropylate        | 0.001 | 0.004 | 0.9999         | 264.3  | 107.3                    | 2.8       | 109.5                    | 4.5       | 103.1                   | 1.5       | 92.7                     | 7.6       | 94.1                     | 2.1       | 91.5                    | 4.5       |
| 26  | Bupirimate            | 0.001 | 0.003 | 0.9998         | 94.6   | 105.4                    | 3.4       | 110.9                    | 4.3       | 106.5                   | 1.7       | 95.1                     | 8.6       | 93.6                     | 5.6       | 91.7                    | 5.4       |
| 27  | Buprofezin            | 0.001 | 0.004 | 0.9998         | 61.3   | 101.2                    | 3.1       | 111.3                    | 4.2       | 106.7                   | 1.7       | 94.6                     | 10.5      | 98.9                     | 2.3       | 91.5                    | 5.3       |
| 28  | Butachlor             | 0.002 | 0.007 | 0.9997         | 102.1  | 109.2                    | 1.2       | 110.3                    | 1.7       | 103.9                   | 2.8       | 90.1                     | 2.5       | 93.8                     | 2.5       | 89.3                    | 5.2       |
| 29  | Butafenacil           | 0.001 | 0.004 | 0.9990         | 444.0  | 103.0                    | 3.9       | 106.1                    | 7.6       | 103.4                   | 1.7       | 90.8                     | 4.9       | 90.4                     | 5.0       | 92.6                    | 1.1       |
| 30  | Butralin              | 0.001 | 0.003 | 0.9985         | 80.8   | 119.9                    | 8.0       | 110.4                    | 2.2       | 103.7                   | 3.3       | 97.1                     | 3.7       | 92.1                     | 5.2       | 97.8                    | 3.0       |
| 31  | Butylate              | 0.002 | 0.006 | 0.9982         | 94.6   | 90.7                     | 4.3       | 98.7                     | 3.9       | 96.7                    | 15.0      | 95.1                     | 4.2       | 92.7                     | 3.5       | 94.6                    | 10.7      |
| 32  | Cadusafos             | 0.002 | 0.005 | 0.9986         | 170.1  | 90.8                     | 2.4       | 111.5                    | 6.5       | 108.4                   | 7.9       | 94.7                     | 6.2       | 94.1                     | 5.5       | 94.2                    | 6.7       |
| 33  | Carbophenothion       | 0.001 | 0.004 | 0.9998         | 173.0  | 101.3                    | 4.2       | 104.6                    | 6.4       | 99.9                    | 1.5       | 89.9                     | 12.8      | 90.8                     | 1.4       | 91.0                    | 1.7       |
| 34  | Carboxin              | 0.003 | 0.009 | 0.9997         | 37.1   | 75.1                     | 20.1      | 104.4                    | 3.0       | 87.8                    | 1.9       | 76.9                     | 10.6      | 78.4                     | 7.5       | 84.8                    | 1.2       |
| 35  | Carfentrazone-ethyl   | 0.001 | 0.003 | 0.9998         | 136.1  | 124.2                    | 7.4       | 107.4                    | 4.3       | 103.9                   | 1.5       | 45.1                     | 139.7     | 94.6                     | 16.7      | 76.3                    | 2.9       |
| 36  | Chinomethionat        | 0.001 | 0.004 | 0.9999         | 86.5   | 299.9                    | 7.0       | 96.1                     | 2.3       | 87.3                    | 0.7       | 75.3                     | 23.9      | 74.5                     | 32.0      | 79.8                    | 11.4      |
| 37  | Chlorbenside          | 0.001 | 0.003 | 1.0000         | 91.9   | 83.5                     | 2.6       | 111.7                    | 2.7       | 105.4                   | 2.1       | 86.6                     | 6.0       | 90.4                     | 3.1       | 88.3                    | 3.1       |
| 38  | Chlorbufam            | 0.002 | 0.005 | 0.9998         | 199.6  | 116.4                    | 8.9       | 108.3                    | 1.6       | 101.7                   | 3.2       | 92.0                     | 19.8      | 87.0                     | 13.4      | 83.3                    | 7.6       |
| 39  | Chlordane- <i>cis</i> | 0.001 | 0.003 | 0.9999         | 46.0   | 86.8                     | 4.0       | 113.9                    | 2.1       | 108.8                   | 3.2       | 95.2                     | 4.2       | 95.5                     | 4.4       | 90.9                    | 6.9       |

| No. | Analyte                 | LOD   | LOQ   | R <sup>2</sup> | ME.(%) | Repeatability (n=5)      |           |                          |           |                         |           | Reproducibility (n=11)   |           |                          |           |                         |           |
|-----|-------------------------|-------|-------|----------------|--------|--------------------------|-----------|--------------------------|-----------|-------------------------|-----------|--------------------------|-----------|--------------------------|-----------|-------------------------|-----------|
|     |                         |       |       |                |        | 0.01 mg kg <sup>-1</sup> |           | 0.02 mg kg <sup>-1</sup> |           | 0.1 mg kg <sup>-1</sup> |           | 0.01 mg kg <sup>-1</sup> |           | 0.02 mg kg <sup>-1</sup> |           | 0.1 mg kg <sup>-1</sup> |           |
|     |                         |       |       |                |        | Rec.<br>(%)              | CV<br>(%) | Rec.<br>(%)              | CV<br>(%) | Rec.<br>(%)             | CV<br>(%) | Rec.<br>(%)              | CV<br>(%) | Rec.<br>(%)              | CV<br>(%) | Rec.<br>(%)             | CV<br>(%) |
|     | Chlordane- <i>trans</i> | 0.001 | 0.003 | 0.9999         | 41.7   | 89.9                     | 3.5       | 113.8                    | 2.7       | 106.6                   | 3.1       | 95.7                     | 7.9       | 95.4                     | 7.3       | 90.9                    | 7.0       |
| 40  | Chlorethoxyfos          | 0.001 | 0.004 | 0.9978         | 55.2   | 87.0                     | 9.0       | 113.7                    | 1.3       | 99.9                    | 12.9      | 92.6                     | 6.2       | 103.9                    | 5.4       | 102.3                   | 6.7       |
| 41  | Chlorfenapyr            | 0.001 | 0.003 | 1.0000         | 90.0   | 102.8                    | 5.7       | 114.7                    | 5.6       | 108.1                   | 1.4       | 89.1                     | 5.6       | 92.3                     | 10.6      | 94.3                    | 5.1       |
| 42  | Chlorfenson             | 0.001 | 0.003 | 0.9999         | 71.2   | 108.7                    | 2.8       | 116.6                    | 4.0       | 110.2                   | 2.4       | 91.9                     | 7.0       | 94.8                     | 3.3       | 90.4                    | 3.1       |
| 43  | Chlorflurenol-methyl    | 0.001 | 0.004 | 0.9999         | 205.0  | 115.7                    | 10.9      | 108.6                    | 3.2       | 104.7                   | 1.7       | 90.3                     | 7.0       | 92.1                     | 2.9       | 92.3                    | 3.5       |
| 44  | Chlornitrofen           | 0.001 | 0.003 | 0.9996         | 120.3  | 114.3                    | 4.2       | 110.6                    | 3.2       | 105.7                   | 1.8       | 97.0                     | 3.7       | 93.9                     | 8.4       | 92.9                    | 2.6       |
| 45  | Chlorobenzilate         | 0.001 | 0.004 | 0.9999         | 104.4  | 102.3                    | 2.3       | 109.3                    | 3.7       | 108.4                   | 1.8       | 91.9                     | 7.6       | 94.7                     | 5.0       | 92.0                    | 5.3       |
| 46  | Chloropropylate         | 0.002 | 0.005 | 0.9998         | 101.8  | 102.3                    | 2.3       | 109.9                    | 4.2       | 108.4                   | 2.2       | 94.0                     | 7.2       | 96.7                     | 1.3       | 93.7                    | 2.0       |
| 47  | Chloroneb               | 0.001 | 0.004 | 0.9985         | 74.2   | 91.4                     | 2.3       | 104.7                    | 6.0       | 105.0                   | 12.4      | 92.5                     | 16.1      | 93.7                     | 14.0      | 96.1                    | 10.8      |
| 48  | Chlorothalonil          | 0.003 | 0.009 | 0.9984         | 221.3  | 333.4                    | 23.5      | 80.1                     | 10.4      | 58.3                    | 3.5       | 63.0                     | 40.9      | 66.8                     | 52.7      | 91.3                    | 29.1      |
| 49  | Chlorpropham            | 0.002 | 0.005 | 0.9987         | 133.4  | 94.3                     | 3.5       | 113.2                    | 3.5       | 104.9                   | 10.2      | 88.0                     | 10.5      | 89.3                     | 4.6       | 92.9                    | 8.3       |
| 50  | Chlorpyrifos            | 0.001 | 0.004 | 0.9990         | 79.8   | 107.8                    | 3.6       | 115.8                    | 2.3       | 108.9                   | 3.8       | 90.1                     | 4.6       | 92.6                     | 2.0       | 91.2                    | 3.3       |
| 51  | Chlorpyrifos-methyl     | 0.002 | 0.005 | 0.9979         | 96.1   | 115.5                    | 4.0       | 107.8                    | 1.9       | 101.1                   | 4.9       | 87.6                     | 6.2       | 91.3                     | 1.7       | 88.8                    | 2.0       |
| 52  | Chlorthal-dimethyl      | 0.001 | 0.003 | 0.9991         | 50.5   | 94.7                     | 3.0       | 117.3                    | 1.9       | 109.2                   | 4.0       | 92.5                     | 7.8       | 90.3                     | 11.9      | 90.2                    | 8.0       |
| 53  | Chlorthion              | 0.001 | 0.004 | 0.9988         | 341.9  | 114.1                    | 2.6       | 103.2                    | 1.7       | 95.9                    | 3.9       | 83.6                     | 10.0      | 89.1                     | 15.6      | 87.7                    | 7.6       |
| 54  | Chlorthiophos           | 0.001 | 0.004 | 1.0000         | 108.0  | 98.3                     | 3.7       | 112.1                    | 3.9       | 106.2                   | 1.4       | 92.2                     | 10.3      | 94.1                     | 1.0       | 91.0                    | 3.7       |
| 55  | Chlozolate              | 0.001 | 0.003 | 0.9996         | 50.1   | 116.0                    | 7.6       | 108.8                    | 2.1       | 104.8                   | 2.1       | 88.4                     | 8.0       | 91.2                     | 1.5       | 89.7                    | 1.7       |
| 56  | Cinmethylin             | 0.001 | 0.003 | 0.9970         | 41.1   | 88.5                     | 3.8       | 110.2                    | 7.7       | 99.5                    | 4.9       | 96.9                     | 11.0      | 98.9                     | 13.3      | 94.9                    | 3.9       |
| 57  | Clomazone               | 0.001 | 0.004 | 0.9999         | 67.6   | 89.9                     | 3.7       | 115.5                    | 1.6       | 107.7                   | 6.6       | 98.3                     | 10.3      | 98.6                     | 4.0       | 97.1                    | 6.7       |
| 58  | Coumaphos               | 0.002 | 0.005 | 0.9993         | >500   | 103.4                    | 8.6       | 98.0                     | 4.9       | 91.4                    | 0.4       | 80.5                     | 21.9      | 81.5                     | 14.0      | 90.3                    | 1.8       |
| 59  | Cyanophos               | 0.001 | 0.004 | 0.9992         | 137.4  | 107.0                    | 4.2       | 111.8                    | 2.0       | 104.4                   | 4.9       | 88.1                     | 10.8      | 90.0                     | 1.1       | 89.3                    | 2.4       |
| 60  | Cyflufenamid            | 0.001 | 0.003 | 0.9999         | 144.7  | 113.2                    | 3.2       | 113.1                    | 4.0       | 108.8                   | 1.3       | 94.9                     | 5.5       | 95.6                     | 4.8       | 93.1                    | 5.9       |
| 61  | Cyfluthrin              | 0.001 | 0.004 | 0.9997         | 421.1  | 368.3                    | 6.4       | 106.1                    | 4.7       | 101.5                   | 3.4       | 90.1                     | 10.5      | 88.5                     | 6.1       | 91.2                    | 6.5       |

| No. | Analyte                  | LOD   | LOQ   | R <sup>2</sup> | ME.(%) | Repeatability (n=5)      |           |                          |           |                         |           | Reproducibility (n=11)   |           |                          |           |                         |           |
|-----|--------------------------|-------|-------|----------------|--------|--------------------------|-----------|--------------------------|-----------|-------------------------|-----------|--------------------------|-----------|--------------------------|-----------|-------------------------|-----------|
|     |                          |       |       |                |        | 0.01 mg kg <sup>-1</sup> |           | 0.02 mg kg <sup>-1</sup> |           | 0.1 mg kg <sup>-1</sup> |           | 0.01 mg kg <sup>-1</sup> |           | 0.02 mg kg <sup>-1</sup> |           | 0.1 mg kg <sup>-1</sup> |           |
|     |                          |       |       |                |        | Rec.<br>(%)              | CV<br>(%) | Rec.<br>(%)              | CV<br>(%) | Rec.<br>(%)             | CV<br>(%) | Rec.<br>(%)              | CV<br>(%) | Rec.<br>(%)              | CV<br>(%) | Rec.<br>(%)             | CV<br>(%) |
| 62  | Cyhalofop-butyl          | 0.001 | 0.004 | 0.9997         | 296.0  | 94.6                     | 3.3       | 103.8                    | 7.8       | 95.5                    | 1.7       | 92.5                     | 11.1      | 95.4                     | 2.2       | 93.2                    | 1.0       |
| 63  | Cyhalothrin, $\gamma$ -  | 0.001 | 0.004 | 0.9998         | 323.5  | 202.7                    | 5.7       | 95.6                     | 5.8       | 95.0                    | 0.9       | 64.9                     | 85.9      | 89.2                     | 23.2      | 97.6                    | 4.9       |
|     | Cyhalothrin, $\lambda$ - | 0.002 | 0.005 | 0.9995         | 429.8  | 314.2                    | 5.1       | 80.5                     | 9.2       | 105.2                   | 1.3       | 57.4                     | 86.5      | 83.6                     | 19.0      | 91.5                    | 2.7       |
| 64  | Cypermethrin             | 0.001 | 0.004 | 0.9997         | 346.2  | 365.4                    | 5.9       | 97.8                     | 4.7       | 96.2                    | 1.1       | 91.6                     | 10.5      | 90.4                     | 9.3       | 90.6                    | 6.2       |
| 65  | Cyprazine                | 0.001 | 0.004 | 0.9992         | 77.2   | 99.7                     | 2.8       | 108.8                    | 1.8       | 104.8                   | 3.6       | 89.1                     | 8.5       | 89.7                     | 5.0       | 91.3                    | 1.8       |
| 66  | Cyprodinil               | 0.001 | 0.004 | 0.9998         | 79.3   | 93.4                     | 2.8       | 108.9                    | 3.0       | 103.9                   | 2.3       | 91.4                     | 6.3       | 92.1                     | 2.9       | 89.1                    | 4.8       |
| 67  | DDD, $p,p'$ -            | 0.001 | 0.003 | 1.0000         | 51.5   | 108.7                    | 4.3       | 108.2                    | 3.8       | 102.7                   | 2.2       | 93.5                     | 12.4      | 95.2                     | 9.6       | 92.2                    | 9.1       |
|     | DDE, $p,p'$ -            | 0.001 | 0.003 | 1.0000         | 46.8   | 78.9                     | 2.4       | 108.0                    | 4.3       | 103.4                   | 2.8       | 88.3                     | 6.1       | 90.9                     | 7.9       | 86.9                    | 7.0       |
|     | DDT, $o,p'$ -            | 0.001 | 0.003 | 0.9997         | 3.3    | 117.9                    | 15.9      | 102.3                    | 5.9       | 100.8                   | 2.3       | 94.8                     | 33.3      | 76.8                     | 14.5      | 68.5                    | 18.0      |
|     | DDT, $p,p'$ -            | 0.001 | 0.003 | 0.9992         | 17.5   | 134.8                    | 12.9      | 98.3                     | 9.3       | 95.3                    | 3.2       | 92.1                     | 54.3      | 77.3                     | 22.0      | 56.7                    | 26.2      |
| 68  | Deltamethrin             | 0.001 | 0.002 | 0.9996         | >500   | 99.8                     | 3.5       | 86.8                     | 3.3       | 90.7                    | 1.3       | 101.9                    | 8.5       | 96.0                     | 5.8       | 99.7                    | 6.9       |
| 69  | Desmetryn                | 0.001 | 0.004 | 0.9992         | 90.8   | 88.0                     | 3.1       | 108.6                    | 0.7       | 103.7                   | 3.9       | 95.8                     | 5.9       | 97.8                     | 7.6       | 96.1                    | 3.4       |
| 70  | Dialifor                 | 0.001 | 0.003 | 0.9993         | 266.8  | 116.9                    | 8.7       | 102.6                    | 4.4       | 95.8                    | 0.5       | 85.1                     | 19.0      | 87.4                     | 12.6      | 86.9                    | 8.0       |
| 71  | Di-Allate                | 0.002 | 0.005 | 0.9986         | 76.8   | 86.4                     | 3.3       | 116.1                    | 2.9       | 100.4                   | 9.3       | 93.0                     | 8.8       | 95.4                     | 5.4       | 94.6                    | 8.8       |
| 72  | Diazinon                 | 0.003 | 0.008 | 0.9985         | 50.2   | 91.1                     | 2.3       | 110.5                    | 2.0       | 107.3                   | 6.7       | 94.5                     | 6.1       | 93.2                     | 5.6       | 94.9                    | 6.9       |
| 73  | Dichlobenil              | 0.002 | 0.006 | 0.9984         | 48.8   | 89.6                     | 2.4       | 105.8                    | 9.6       | 103.1                   | 14.7      | 94.2                     | 5.8       | 98.0                     | 7.8       | 97.9                    | 10.1      |
| 74  | Dichlofenthion           | 0.001 | 0.004 | 0.9961         | 72.9   | 88.2                     | 2.1       | 110.4                    | 2.2       | 104.4                   | 6.9       | 92.3                     | 5.7       | 94.4                     | 4.3       | 92.1                    | 6.6       |
| 75  | Dichlofluanid            | 0.002 | 0.006 | 0.9546         | 227.5  | 55.2                     | 8.5       | 471.3                    | 2.2       | 26.4                    | 18.3      | 120.1                    | 68.2      | 118.9                    | 38.8      | 124.5                   | 52.8      |
| 76  | Dichlormid               | 0.002 | 0.006 | 0.9997         | 38.2   | 98.4                     | 6.7       | 118.2                    | 1.6       | 100.2                   | 13.7      | 100.5                    | 9.1       | 105.6                    | 11.3      | 104.2                   | 9.5       |
| 77  | Diclobutrazol            | 0.002 | 0.005 | 0.9996         | 394.1  | 116.0                    | 3.5       | 109.0                    | 4.7       | 105.4                   | 1.1       | 91.2                     | 11.1      | 93.6                     | 4.1       | 92.6                    | 5.7       |
| 78  | Diclofop-methyl          | 0.001 | 0.003 | 0.9998         | 133.8  | 100.4                    | 3.4       | 103.8                    | 5.2       | 99.2                    | 1.9       | 92.2                     | 8.4       | 94.3                     | 2.6       | 90.9                    | 4.2       |
| 79  | Dicloran                 | 0.001 | 0.004 | 0.9994         | 125.6  | 113.6                    | 8.4       | 115.1                    | 2.7       | 106.4                   | 4.7       | 97.7                     | 4.0       | 96.4                     | 5.5       | 95.0                    | 4.1       |
| 80  | Dicofol                  | 0.001 | 0.003 | 0.9999         | 51.2   | 62.8                     | 7.4       | 115.1                    | 2.7       | 110.4                   | 2.1       | 86.0                     | 16.6      | 85.8                     | 13.5      | 94.8                    | 9.5       |

| No. | Analyte                | LOD   | LOQ   | R <sup>2</sup> | ME.(%) | Repeatability (n=5)      |           |                          |           |                         |           | Reproducibility (n=11)   |           |                          |           |                         |           |
|-----|------------------------|-------|-------|----------------|--------|--------------------------|-----------|--------------------------|-----------|-------------------------|-----------|--------------------------|-----------|--------------------------|-----------|-------------------------|-----------|
|     |                        |       |       |                |        | 0.01 mg kg <sup>-1</sup> |           | 0.02 mg kg <sup>-1</sup> |           | 0.1 mg kg <sup>-1</sup> |           | 0.01 mg kg <sup>-1</sup> |           | 0.02 mg kg <sup>-1</sup> |           | 0.1 mg kg <sup>-1</sup> |           |
|     |                        |       |       |                |        | Rec.<br>(%)              | CV<br>(%) | Rec.<br>(%)              | CV<br>(%) | Rec.<br>(%)             | CV<br>(%) | Rec.<br>(%)              | CV<br>(%) | Rec.<br>(%)              | CV<br>(%) | Rec.<br>(%)             | CV<br>(%) |
| 81  | Dicrotophos            | 0.002 | 0.007 | 0.9984         | >500   | 105.3                    | 13.2      | 92.9                     | 4.8       | 85.3                    | 5.5       | 103.6                    | 20.2      | 88.1                     | 18.4      | 87.2                    | 18.1      |
| 82  | Diethatyl-ethyl        | 0.001 | 0.003 | 0.9999         | 107.2  | 115.1                    | 3.1       | 116.0                    | 3.8       | 110.3                   | 2.3       | 98.2                     | 9.3       | 99.9                     | 4.4       | 94.8                    | 3.2       |
| 83  | Diethofencarb          | 0.002 | 0.005 | 0.9993         | 285.2  | 118.4                    | 8.8       | 112.2                    | 3.0       | 107.2                   | 2.5       | 80.7                     | 16.5      | 88.8                     | 6.0       | 92.0                    | 3.8       |
| 84  | Difenoconazole         | 0.001 | 0.002 | 0.9996         | 404.9  | 96.7                     | 3.5       | 104.3                    | 5.4       | 101.3                   | 0.5       | 91.5                     | 10.0      | 92.0                     | 7.1       | 93.1                    | 7.0       |
| 85  | Diflufenican           | 0.001 | 0.004 | 0.9999         | 254.8  | 98.6                     | 3.2       | 107.3                    | 4.8       | 101.4                   | 1.1       | 88.1                     | 11.7      | 91.6                     | 4.1       | 89.3                    | 8.0       |
| 86  | Dimepiperate           | 0.001 | 0.004 | 0.9995         | 92.4   | 101.3                    | 3.1       | 109.6                    | 3.0       | 104.3                   | 2.8       | 95.1                     | 7.7       | 95.9                     | 7.1       | 91.8                    | 4.3       |
| 87  | Dimethachlor           | 0.003 | 0.009 | 0.9986         | 63.4   | 100.2                    | 2.7       | 110.6                    | 1.5       | 105.5                   | 4.4       | 88.6                     | 2.0       | 92.1                     | 4.3       | 94.0                    | 4.9       |
| 88  | Dimethametryn          | 0.001 | 0.003 | 0.9995         | 85.0   | 101.8                    | 1.9       | 108.2                    | 3.1       | 103.8                   | 2.2       | 92.1                     | 6.7       | 91.6                     | 3.6       | 89.9                    | 4.5       |
| 89  | Dimethenamid           | 0.001 | 0.004 | 0.9973         | 61.6   | 97.3                     | 2.9       | 110.2                    | 1.4       | 105.1                   | 5.6       | 92.7                     | 6.7       | 93.4                     | 3.8       | 92.6                    | 6.2       |
| 90  | Dimethipin             | 0.002 | 0.005 | 0.9999         | 92.2   | 335.6                    | 14.7      | 111.1                    | 3.4       | 97.3                    | 3.3       | 83.1                     | 14.4      | 86.4                     | 1.5       | 85.9                    | 7.4       |
| 91  | Dimethomorph (E)       | 0.002 | 0.005 | 0.9988         | >500   | 95.7                     | 4.8       | 96.6                     | 6.3       | 100.1                   | 0.8       | 91.0                     | 7.4       | 92.2                     | 3.5       | 88.7                    | 8.1       |
|     | Dimethomorph (Z)       | 0.002 | 0.005 | 0.9998         | >500   | 82.4                     | 6.4       | 104.2                    | 7.3       | 104.8                   | 0.9       | 90.5                     | 13.5      | 93.1                     | 4.7       | 89.8                    | 9.1       |
| 92  | Dimethylvinphos (E)    | 0.002 | 0.005 | 0.9992         | 262.7  | 106.8                    | 12.4      | 98.5                     | 3.1       | 90.0                    | 2.1       | 80.0                     | 11.5      | 86.7                     | 9.8       | 82.8                    | 16.2      |
|     | Dimethylvinphos (Z)    | 0.001 | 0.004 | 0.9997         | 351.3  | 116.1                    | 11.7      | 103.1                    | 2.4       | 91.2                    | 1.5       | 79.1                     | 9.2       | 85.6                     | 13.9      | 82.2                    | 17.1      |
| 93  | Diniconazole           | 0.002 | 0.005 | 0.9994         | 425.4  | 111.4                    | 2.9       | 108.0                    | 4.6       | 103.2                   | 2.1       | 93.2                     | 11.0      | 93.5                     | 1.4       | 92.5                    | 5.0       |
| 94  | Dinitramine            | 0.001 | 0.004 | 0.9958         | 109.6  | 103.2                    | 4.9       | 106.7                    | 2.6       | 102.2                   | 6.5       | 97.0                     | 5.4       | 92.5                     | 4.4       | 97.5                    | 3.7       |
| 95  | Dioxathion             | 0.002 | 0.006 | 0.9999         | 66.7   | 90.5                     | 4.3       | 113.3                    | 1.3       | 108.6                   | 0.8       | 87.4                     | 11.2      | 92.1                     | 4.3       | 90.5                    | 4.6       |
| 96  | Diphenamid             | 0.001 | 0.003 | 0.9998         | 55.5   | 99.8                     | 2.3       | 114.9                    | 1.7       | 108.1                   | 2.6       | 90.7                     | 3.6       | 93.1                     | 3.1       | 92.6                    | 3.8       |
| 97  | Diphenylamine          | 0.002 | 0.006 | 0.9966         | 107.4  | 90.3                     | 2.5       | 117.2                    | 1.5       | 103.2                   | 8.9       | 93.0                     | 3.8       | 91.9                     | 4.6       | 90.6                    | 6.0       |
| 98  | Dithiopyr              | 0.001 | 0.003 | 0.9982         | 59.8   | 89.1                     | 1.9       | 111.9                    | 1.0       | 106.5                   | 4.4       | 96.5                     | 4.6       | 95.2                     | 5.0       | 92.8                    | 7.7       |
| 99  | Edifenphos             | 0.002 | 0.005 | 0.9998         | >500   | 196.0                    | 10.6      | 88.7                     | 6.1       | 76.0                    | 2.5       | 68.7                     | 32.9      | 85.0                     | 27.5      | 67.2                    | 18.6      |
| 100 | Endosulfan, $\alpha$ - | 0.001 | 0.003 | 0.9998         | 36.8   | 93.9                     | 3.8       | 113.9                    | 3.3       | 109.0                   | 3.2       | 89.2                     | 11.2      | 94.6                     | 6.1       | 89.2                    | 7.1       |
|     | Endosulfan, $\beta$ -  | 0.001 | 0.003 | 1.0000         | 27.4   | 110.3                    | 6.7       | 112.3                    | 2.9       | 108.4                   | 2.8       | 96.5                     | 10.1      | 97.7                     | 8.2       | 92.0                    | 7.7       |

| No. | Analyte              | LOD   | LOQ   | R <sup>2</sup> | ME.(%) | Repeatability (n=5)      |           |                          |           |                         |           | Reproducibility (n=11)   |           |                          |           |                         |           |
|-----|----------------------|-------|-------|----------------|--------|--------------------------|-----------|--------------------------|-----------|-------------------------|-----------|--------------------------|-----------|--------------------------|-----------|-------------------------|-----------|
|     |                      |       |       |                |        | 0.01 mg kg <sup>-1</sup> |           | 0.02 mg kg <sup>-1</sup> |           | 0.1 mg kg <sup>-1</sup> |           | 0.01 mg kg <sup>-1</sup> |           | 0.02 mg kg <sup>-1</sup> |           | 0.1 mg kg <sup>-1</sup> |           |
|     |                      |       |       |                |        | Rec.<br>(%)              | CV<br>(%) | Rec.<br>(%)              | CV<br>(%) | Rec.<br>(%)             | CV<br>(%) | Rec.<br>(%)              | CV<br>(%) | Rec.<br>(%)              | CV<br>(%) | Rec.<br>(%)             | CV<br>(%) |
|     | Endosulfan, sulfate- | 0.001 | 0.003 | 1.0000         | 63.9   | 91.4                     | 2.7       | 106.6                    | 5.4       | 100.6                   | 2.2       | 75.0                     | 8.9       | 83.6                     | 9.4       | 89.1                    | 11.3      |
| 101 | Endrin               | 0.001 | 0.003 | 0.9999         | 57.7   | 90.9                     | 4.3       | 112.9                    | 2.4       | 107.9                   | 2.7       | 95.0                     | 13.4      | 97.3                     | 13.5      | 90.9                    | 12.1      |
|     | δ-keto-Endrin        | 0.001 | 0.004 | 0.9993         | 23.1   | 60.3                     | 17.5      | 112.2                    | 5.9       | 107.6                   | 2.2       | 88.9                     | 21.4      | 86.2                     | 15.2      | 90.4                    | 9.7       |
| 102 | EPN                  | 0.001 | 0.004 | 0.9995         | 259.7  | 119.8                    | 5.3       | 111.3                    | 3.6       | 101.0                   | 1.6       | 93.9                     | 3.3       | 92.1                     | 10.6      | 95.2                    | 3.8       |
| 103 | Epoxiconazole        | 0.001 | 0.003 | 0.9999         | 165.0  | 99.5                     | 5.0       | 112.3                    | 5.0       | 104.8                   | 1.3       | 95.5                     | 9.4       | 94.7                     | 8.1       | 92.5                    | 8.2       |
| 104 | EPTC                 | 0.003 | 0.009 | 0.9991         | 35.2   | 85.8                     | 4.5       | 110.6                    | 4.8       | 99.0                    | 14.7      | 97.8                     | 4.7       | 103.0                    | 5.4       | 101.6                   | 3.6       |
| 105 | Etaconazole-1        | 0.001 | 0.003 | 1.0000         | 88.8   | 98.3                     | 1.0       | 114.4                    | 5.1       | 111.7                   | 1.6       | 93.2                     | 9.1       | 100.1                    | 9.0       | 97.6                    | 3.7       |
|     | Etaconazole-2        | 0.001 | 0.003 | 0.9998         | 63.3   | 97.6                     | 4.0       | 109.2                    | 9.9       | 115.9                   | 2.0       | 95.9                     | 0.8       | 97.0                     | 2.4       | 96.1                    | 0.3       |
| 106 | Ethalfuralin         | 0.001 | 0.004 | 0.9996         | 67.1   | 99.4                     | 2.8       | 111.2                    | 3.1       | 99.7                    | 11.2      | 98.7                     | 3.6       | 94.3                     | 3.0       | 97.5                    | 5.6       |
| 107 | Ethion               | 0.001 | 0.003 | 0.9996         | 137.9  | 109.3                    | 3.7       | 109.4                    | 4.2       | 105.4                   | 1.4       | 90.4                     | 11.6      | 94.0                     | 2.1       | 94.6                    | 0.7       |
| 108 | Ethofumesate         | 0.001 | 0.003 | 0.9993         | 66.5   | 90.1                     | 2.4       | 109.0                    | 2.2       | 105.2                   | 2.7       | 95.8                     | 7.8       | 92.8                     | 5.0       | 91.7                    | 3.8       |
| 109 | Ethoprophos          | 0.002 | 0.005 | 0.9955         | 172.0  | 98.3                     | 3.8       | 117.9                    | 3.1       | 102.6                   | 6.1       | 94.9                     | 6.2       | 91.5                     | 6.3       | 95.9                    | 6.6       |
| 110 | Ethychlozate         | 0.001 | 0.004 | 0.9995         | 257.0  | 117.9                    | 8.7       | 92.6                     | 3.1       | 90.9                    | 1.3       | 80.7                     | 18.7      | 83.0                     | 10.3      | 91.8                    | 8.3       |
| 111 | Etoxazole            | 0.001 | 0.004 | 0.9998         | 165.0  | 78.0                     | 1.7       | 109.4                    | 4.2       | 102.9                   | 1.0       | 94.5                     | 3.8       | 92.0                     | 3.7       | 90.5                    | 6.0       |
| 112 | Etridiazole          | 0.002 | 0.005 | 0.9937         | 48.4   | 99.1                     | 15.1      | 103.3                    | 6.3       | 86.9                    | 14.6      | 87.2                     | 19.9      | 82.6                     | 11.1      | 87.2                    | 14.0      |
| 113 | Fenamidone           | 0.001 | 0.003 | 0.9998         | 123.6  | 86.7                     | 2.7       | 111.7                    | 4.0       | 105.4                   | 1.4       | 92.3                     | 7.0       | 92.3                     | 3.4       | 92.3                    | 3.5       |
| 114 | Fenarimol            | 0.001 | 0.004 | 0.9998         | 212.6  | 92.8                     | 2.8       | 108.6                    | 5.2       | 102.9                   | 1.5       | 99.4                     | 13.6      | 97.1                     | 6.1       | 92.9                    | 0.3       |
| 115 | Fenbuconazole        | 0.001 | 0.004 | 0.9998         | 308.4  | 90.2                     | 4.3       | 110.6                    | 5.7       | 105.2                   | 1.2       | 90.3                     | 10.0      | 95.0                     | 3.8       | 91.9                    | 3.7       |
| 116 | Fenchlorphos         | 0.002 | 0.005 | 0.9996         | 79.7   | 99.5                     | 3.0       | 108.5                    | 1.3       | 101.6                   | 3.9       | 88.7                     | 9.5       | 91.2                     | 2.5       | 88.8                    | 3.0       |
| 117 | Fencloirim           | 0.001 | 0.004 | 0.9953         | 106.1  | 94.3                     | 3.1       | 111.6                    | 2.3       | 98.6                    | 10.5      | 91.6                     | 4.6       | 91.7                     | 7.3       | 89.5                    | 7.9       |
| 118 | Fenfuram             | 0.002 | 0.006 | 0.9996         | -10.9  | 94.9                     | 10.4      | 96.7                     | 2.7       | 74.6                    | 4.2       | 73.6                     | 18.5      | 83.0                     | 19.6      | 85.8                    | 20.2      |
| 119 | Fenitrothion         | 0.002 | 0.005 | 0.9989         | 209.6  | 119.3                    | 3.5       | 104.4                    | 3.2       | 99.9                    | 3.2       | 86.0                     | 6.8       | 87.7                     | 3.3       | 86.5                    | 8.6       |
| 120 | Fenobucarb           | 0.002 | 0.007 | 0.9998         | 143.0  | 118.8                    | 3.3       | 115.7                    | 2.1       | 100.5                   | 10.0      | 90.9                     | 5.8       | 92.0                     | 4.0       | 90.9                    | 6.1       |

| No. | Analyte            | LOD   | LOQ   | R <sup>2</sup> | ME.(%) | Repeatability (n=5)      |           |                          |           |                         |           | Reproducibility (n=11)   |           |                          |           |                         |           |
|-----|--------------------|-------|-------|----------------|--------|--------------------------|-----------|--------------------------|-----------|-------------------------|-----------|--------------------------|-----------|--------------------------|-----------|-------------------------|-----------|
|     |                    |       |       |                |        | 0.01 mg kg <sup>-1</sup> |           | 0.02 mg kg <sup>-1</sup> |           | 0.1 mg kg <sup>-1</sup> |           | 0.01 mg kg <sup>-1</sup> |           | 0.02 mg kg <sup>-1</sup> |           | 0.1 mg kg <sup>-1</sup> |           |
|     |                    |       |       |                |        | Rec.<br>(%)              | CV<br>(%) | Rec.<br>(%)              | CV<br>(%) | Rec.<br>(%)             | CV<br>(%) | Rec.<br>(%)              | CV<br>(%) | Rec.<br>(%)              | CV<br>(%) | Rec.<br>(%)             | CV<br>(%) |
| 121 | Fenothiocarb       | 0.001 | 0.003 | 0.9999         | 171.4  | 95.4                     | 3.0       | 115.0                    | 3.8       | 109.7                   | 1.9       | 92.2                     | 6.8       | 94.9                     | 2.5       | 92.6                    | 1.1       |
| 122 | Fenoxanil          | 0.001 | 0.004 | 0.9999         | 443.8  | 119.2                    | 4.5       | 111.0                    | 4.9       | 105.1                   | 1.5       | 89.7                     | 11.1      | 93.8                     | 1.4       | 88.9                    | 2.6       |
| 123 | Fenpropathrin      | 0.001 | 0.003 | 0.9998         | 133.9  | 113.1                    | 9.6       | 110.1                    | 5.5       | 102.8                   | 1.8       | 96.6                     | 6.1       | 93.9                     | 0.9       | 94.2                    | 2.0       |
| 124 | Fenpropimorph      | 0.001 | 0.003 | 0.9975         | 80.5   | 94.7                     | 2.9       | 108.3                    | 2.1       | 104.0                   | 3.2       | 93.8                     | 1.1       | 93.4                     | 2.0       | 92.0                    | 1.0       |
| 125 | Fenpyrazamine      | 0.001 | 0.004 | 0.9993         | >500   | 118.2                    | 10.2      | 100.5                    | 5.3       | 89.7                    | 0.8       | 83.8                     | 11.1      | 85.2                     | 5.4       | 85.3                    | 4.2       |
| 126 | Fenson             | 0.001 | 0.003 | 0.9998         | 40.6   | 105.7                    | 3.3       | 114.8                    | 2.7       | 108.6                   | 2.8       | 93.7                     | 5.8       | 93.7                     | 3.5       | 92.1                    | 3.5       |
| 127 | Fenthion           | 0.002 | 0.007 | 0.9992         | 99.7   | 102.2                    | 4.1       | 112.1                    | 1.8       | 105.6                   | 2.7       | 89.2                     | 5.9       | 88.9                     | 4.7       | 88.6                    | 2.6       |
| 128 | Fenvalerate-1      | 0.001 | 0.004 | 0.9998         | 347.6  | 144.8                    | 13.6      | 96.7                     | 4.4       | 96.0                    | 0.5       | 93.3                     | 6.6       | 91.4                     | 12.7      | 95.6                    | 7.0       |
|     | Fenvalerate-2      | 0.001 | 0.004 | 0.9997         | >500   | 138.1                    | 11.8      | 102.5                    | 6.8       | 100.0                   | 0.2       | 93.1                     | 5.9       | 91.9                     | 12.8      | 96.9                    | 4.9       |
| 129 | Fipronil           | 0.001 | 0.003 | 0.9993         | 225.6  | 119.5                    | 8.8       | 106.1                    | 4.8       | 103.8                   | 2.5       | 94.1                     | 3.7       | 92.7                     | 1.8       | 92.4                    | 3.2       |
| 130 | Flamprop-isopropyl | 0.002 | 0.005 | 1.0000         | 68.4   | 97.3                     | 2.3       | 110.9                    | 4.5       | 107.3                   | 1.6       | 99.7                     | 8.1       | 100.7                    | 4.6       | 96.6                    | 2.8       |
| 131 | Fluacrypyrim       | 0.001 | 0.004 | 0.9999         | 152.8  | 101.3                    | 3.4       | 109.2                    | 4.7       | 105.9                   | 1.4       | 94.5                     | 9.2       | 96.6                     | 1.4       | 93.7                    | 4.7       |
| 132 | Fluazifop-butyl    | 0.001 | 0.003 | 0.9996         | 146.8  | 102.2                    | 2.7       | 111.4                    | 4.1       | 107.8                   | 1.5       | 94.7                     | 5.0       | 95.9                     | 4.3       | 93.4                    | 5.3       |
| 133 | Fluchloralin       | 0.001 | 0.003 | 0.9991         | 59.0   | 119.5                    | 3.9       | 111.7                    | 2.4       | 104.3                   | 7.0       | 100.3                    | 5.3       | 96.0                     | 2.7       | 98.3                    | 5.3       |
| 134 | Flucythrinate-1    | 0.001 | 0.004 | 0.9993         | 426.4  | 116.2                    | 3.2       | 104.2                    | 5.4       | 101.5                   | 0.7       | 96.0                     | 11.9      | 93.6                     | 16.8      | 95.8                    | 6.0       |
|     | Flucythrinate-2    | 0.001 | 0.004 | 0.9993         | 461.4  | 116.9                    | 3.9       | 103.1                    | 4.8       | 100.3                   | 0.6       | 95.6                     | 11.9      | 92.6                     | 14.9      | 95.5                    | 5.1       |
| 135 | Fluensulfone       | 0.003 | 0.008 | 0.9994         | 117.3  | 103.5                    | 2.0       | 117.4                    | 2.8       | 106.2                   | 9.6       | 95.5                     | 6.0       | 92.4                     | 5.2       | 92.6                    | 9.2       |
| 136 | Flufenpyr-ethyl    | 0.001 | 0.004 | 0.9991         | 171.1  | 118.4                    | 6.3       | 107.0                    | 3.6       | 103.2                   | 1.4       | 94.2                     | 13.3      | 97.3                     | 5.1       | 96.7                    | 3.8       |
| 137 | Flumetralin        | 0.001 | 0.003 | 0.9983         | 98.3   | 117.4                    | 5.4       | 111.6                    | 2.3       | 107.1                   | 3.1       | 102.2                    | 4.2       | 98.5                     | 6.0       | 94.7                    | 2.4       |
| 138 | Flumioxazin        | 0.001 | 0.004 | 0.9992         | 465.1  | 119.1                    | 8.8       | 100.3                    | 6.4       | 100.9                   | 0.5       | 87.7                     | 14.9      | 83.2                     | 15.0      | 91.0                    | 10.8      |
| 139 | Fluopyram          | 0.001 | 0.004 | 0.9996         | 163.7  | 115.0                    | 3.4       | 108.7                    | 3.8       | 105.3                   | 1.4       | 91.7                     | 7.9       | 95.6                     | 1.1       | 92.4                    | 5.0       |
| 140 | Fluorochloridone   | 0.001 | 0.004 | 0.9999         | 81.3   | 119.1                    | 8.2       | 109.2                    | 6.0       | 103.9                   | 1.5       | 100.6                    | 15.2      | 98.4                     | 15.1      | 94.3                    | 13.2      |
| 141 | Fluquinconazole    | 0.001 | 0.003 | 0.9994         | 167.4  | 115.5                    | 8.4       | 109.0                    | 3.3       | 103.5                   | 1.9       | 91.5                     | 5.8       | 92.8                     | 0.3       | 90.2                    | 3.2       |

| No. | Analyte            | LOD   | LOQ   | R <sup>2</sup> | ME.(%) | Repeatability (n=5)      |           |                          |           |                         |           | Reproducibility (n=11)   |           |                          |           |                         |           |
|-----|--------------------|-------|-------|----------------|--------|--------------------------|-----------|--------------------------|-----------|-------------------------|-----------|--------------------------|-----------|--------------------------|-----------|-------------------------|-----------|
|     |                    |       |       |                |        | 0.01 mg kg <sup>-1</sup> |           | 0.02 mg kg <sup>-1</sup> |           | 0.1 mg kg <sup>-1</sup> |           | 0.01 mg kg <sup>-1</sup> |           | 0.02 mg kg <sup>-1</sup> |           | 0.1 mg kg <sup>-1</sup> |           |
|     |                    |       |       |                |        | Rec.<br>(%)              | CV<br>(%) | Rec.<br>(%)              | CV<br>(%) | Rec.<br>(%)             | CV<br>(%) | Rec.<br>(%)              | CV<br>(%) | Rec.<br>(%)              | CV<br>(%) | Rec.<br>(%)             | CV<br>(%) |
| 142 | Flusilazole        | 0.001 | 0.003 | 0.9999         | 91.8   | 102.7                    | 3.6       | 111.0                    | 4.2       | 107.7                   | 1.8       | 92.7                     | 8.0       | 93.8                     | 3.7       | 91.8                    | 5.5       |
| 143 | Flutianil          | 0.001 | 0.004 | 0.9993         | 227.7  | 98.9                     | 3.7       | 108.8                    | 5.5       | 104.6                   | 1.5       | 95.9                     | 2.4       | 96.6                     | 2.8       | 92.3                    | 3.0       |
| 144 | Fluvalinate-1      | 0.001 | 0.004 | 1.0000         | >500   | 162.7                    | 14.2      | 88.3                     | 3.9       | 88.1                    | 3.4       | 83.3                     | 9.4       | 83.1                     | 10.3      | 86.7                    | 5.1       |
|     | Fluvalinate-2      | 0.001 | 0.004 | 0.9995         | >500   | 168.1                    | 13.7      | 88.1                     | 3.7       | 87.0                    | 4.1       | 85.6                     | 7.5       | 82.6                     | 9.4       | 86.9                    | 2.6       |
| 145 | Fluxapyroxad       | 0.001 | 0.003 | 0.9999         | 430.4  | 112.9                    | 3.5       | 111.7                    | 5.2       | 100.3                   | 1.1       | 93.3                     | 7.9       | 92.9                     | 2.7       | 92.0                    | 4.5       |
| 146 | Fonofos            | 0.001 | 0.004 | 0.9992         | 51.9   | 89.3                     | 1.6       | 116.9                    | 1.9       | 105.2                   | 9.1       | 94.2                     | 6.6       | 94.2                     | 4.8       | 93.1                    | 6.5       |
| 147 | Formothion         | 0.002 | 0.006 | 0.9995         | 347.8  | 117.2                    | 7.2       | 101.0                    | 1.2       | 90.7                    | 3.0       | 81.1                     | 15.5      | 85.0                     | 7.2       | 79.9                    | 14.2      |
| 148 | Fthalide           | 0.001 | 0.003 | 0.9999         | 51.1   | 117.0                    | 6.5       | 112.9                    | 0.7       | 106.7                   | 2.2       | 91.7                     | 5.9       | 93.5                     | 3.2       | 90.5                    | 3.2       |
| 149 | Halfenprox         | 0.001 | 0.003 | 0.9991         | 199.0  | 96.4                     | 5.4       | 102.7                    | 6.1       | 103.3                   | 1.2       | 96.1                     | 9.0       | 91.5                     | 14.9      | 96.4                    | 3.3       |
| 150 | Heptachlor         | 0.001 | 0.004 | 0.9994         | 49.8   | 95.3                     | 8.0       | 102.9                    | 4.8       | 96.7                    | 7.9       | 93.4                     | 11.9      | 95.7                     | 13.6      | 84.4                    | 5.6       |
|     | Heptachlor epoxide | 0.001 | 0.004 | 0.9998         | 19.7   | 92.9                     | 3.1       | 113.9                    | 1.2       | 111.5                   | 5.2       | 98.9                     | 3.4       | 96.3                     | 3.1       | 93.9                    | 6.1       |
| 151 | Heptenophos        | 0.002 | 0.006 | 0.9994         | 166.9  | 115.0                    | 9.7       | 115.1                    | 2.8       | 98.0                    | 11.3      | 90.9                     | 5.0       | 92.1                     | 2.0       | 90.5                    | 2.8       |
| 152 | Hexythiazox        | 0.002 | 0.005 | 0.9995         | 278.4  | 109.2                    | 5.4       | 99.0                     | 6.6       | 116.2                   | 1.9       | 82.5                     | 23.2      | 97.6                     | 1.2       | 98.8                    | 3.9       |
| 153 | Indanofan          | 0.001 | 0.004 | 0.9999         | 245.6  | 88.7                     | 7.3       | 111.1                    | 4.9       | 103.8                   | 1.1       | 89.7                     | 7.0       | 96.3                     | 2.4       | 91.4                    | 7.6       |
| 154 | Indoxacarb         | 0.001 | 0.003 | 0.9998         | 264.2  | 118.5                    | 8.1       | 110.2                    | 3.8       | 103.1                   | 1.7       | 88.0                     | 10.3      | 87.6                     | 8.4       | 86.2                    | 12.6      |
| 155 | Ipconazole         | 0.002 | 0.005 | 0.9996         | 337.2  | 93.0                     | 2.7       | 110.1                    | 4.9       | 103.9                   | 1.3       | 97.3                     | 13.9      | 96.3                     | 10.8      | 93.1                    | 2.4       |
| 156 | Iprobenfos         | 0.002 | 0.005 | 0.9987         | 249.7  | 103.8                    | 2.5       | 101.9                    | 6.9       | 101.0                   | 5.5       | 92.3                     | 6.7       | 92.7                     | 2.7       | 93.8                    | 5.8       |
| 157 | Iprodione          | 0.001 | 0.004 | 0.9998         | >500   | 114.1                    | 7.4       | 91.8                     | 10.9      | 78.0                    | 1.6       | 78.2                     | 11.2      | 85.1                     | 10.4      | 76.4                    | 8.2       |
| 158 | Isazofos           | 0.001 | 0.004 | 0.9994         | 47.5   | 96.1                     | 2.1       | 111.3                    | 2.3       | 105.8                   | 6.2       | 96.1                     | 5.5       | 95.2                     | 3.2       | 94.0                    | 3.6       |
| 159 | Isofenphos         | 0.001 | 0.004 | 0.9993         | 76.1   | 107.0                    | 2.6       | 110.2                    | 3.3       | 106.1                   | 2.1       | 95.4                     | 5.0       | 95.6                     | 2.6       | 92.3                    | 4.5       |
| 160 | Isofenphos-methyl  | 0.001 | 0.003 | 0.9991         | 79.5   | 109.7                    | 2.9       | 111.0                    | 1.7       | 106.8                   | 2.8       | 95.6                     | 4.6       | 95.3                     | 2.3       | 92.4                    | 4.5       |
| 161 | Isoproc carb       | 0.003 | 0.008 | 0.9996         | 151.8  | 116.6                    | 5.2       | 115.7                    | 1.2       | 99.3                    | 11.7      | 89.4                     | 9.2       | 89.5                     | 5.2       | 89.9                    | 2.6       |
| 162 | Isopropalin        | 0.001 | 0.003 | 0.9992         | 70.3   | 112.6                    | 3.0       | 109.9                    | 2.2       | 104.2                   | 3.4       | 94.9                     | 4.7       | 92.3                     | 3.0       | 95.9                    | 2.9       |

| No. | Analyte                 | LOD   | LOQ   | R <sup>2</sup> | ME.(%) | Repeatability (n=5)      |           |                          |           |                         |           | Reproducibility (n=11)   |           |                          |           |                         |           |
|-----|-------------------------|-------|-------|----------------|--------|--------------------------|-----------|--------------------------|-----------|-------------------------|-----------|--------------------------|-----------|--------------------------|-----------|-------------------------|-----------|
|     |                         |       |       |                |        | 0.01 mg kg <sup>-1</sup> |           | 0.02 mg kg <sup>-1</sup> |           | 0.1 mg kg <sup>-1</sup> |           | 0.01 mg kg <sup>-1</sup> |           | 0.02 mg kg <sup>-1</sup> |           | 0.1 mg kg <sup>-1</sup> |           |
|     |                         |       |       |                |        | Rec.<br>(%)              | CV<br>(%) | Rec.<br>(%)              | CV<br>(%) | Rec.<br>(%)             | CV<br>(%) | Rec.<br>(%)              | CV<br>(%) | Rec.<br>(%)              | CV<br>(%) | Rec.<br>(%)             | CV<br>(%) |
| 163 | Isoprothiolane          | 0.001 | 0.003 | 1.0000         | 89.4   | 101.9                    | 2.5       | 115.9                    | 4.0       | 109.9                   | 1.8       | 92.6                     | 6.1       | 96.0                     | 0.6       | 92.3                    | 3.5       |
| 164 | Isopyrazam              | 0.001 | 0.004 | 0.9994         | 418.4  | 101.8                    | 3.9       | 106.1                    | 5.4       | 100.3                   | 0.7       | 94.1                     | 7.0       | 93.8                     | 1.0       | 93.6                    | 1.5       |
| 165 | Isotianil               | 0.001 | 0.004 | 0.9997         | >500   | 119.4                    | 8.9       | 113.6                    | 4.6       | 102.8                   | 1.3       | 90.1                     | 12.9      | 90.9                     | 2.1       | 91.8                    | 3.5       |
| 166 | Isoxadifen-ethyl        | 0.001 | 0.003 | 0.9999         | 108.0  | 115.7                    | 8.7       | 108.3                    | 4.4       | 104.9                   | 1.5       | 93.3                     | 5.7       | 91.5                     | 3.0       | 92.5                    | 5.1       |
| 167 | Kresoxim-methyl         | 0.001 | 0.003 | 1.0000         | 55.5   | 109.3                    | 2.8       | 114.9                    | 4.4       | 109.5                   | 1.9       | 94.4                     | 6.2       | 96.6                     | 3.4       | 92.1                    | 5.3       |
| 168 | Leptophos               | 0.001 | 0.004 | 0.9998         | 183.9  | 114.9                    | 6.0       | 102.0                    | 4.9       | 95.9                    | 1.7       | 88.5                     | 15.9      | 91.3                     | 9.2       | 83.7                    | 6.2       |
| 169 | Mefenpyr-diethyl        | 0.001 | 0.003 | 0.9999         | 164.4  | 101.1                    | 2.7       | 105.5                    | 5.1       | 101.7                   | 1.6       | 91.0                     | 8.6       | 91.8                     | 6.4       | 91.6                    | 5.9       |
| 170 | Mepanipyrin             | 0.001 | 0.004 | 1.0000         | 159.0  | 94.1                     | 3.4       | 115.2                    | 4.5       | 110.5                   | 1.9       | 92.1                     | 8.8       | 93.2                     | 4.9       | 90.7                    | 3.0       |
| 171 | Mepronil                | 0.001 | 0.004 | 0.9999         | 293.6  | 97.7                     | 4.0       | 107.9                    | 5.8       | 104.3                   | 0.9       | 86.0                     | 6.8       | 90.7                     | 5.3       | 91.9                    | 4.9       |
| 172 | Metalaxyl               | 0.001 | 0.004 | 0.9996         | 63.7   | 90.2                     | 2.8       | 107.6                    | 2.7       | 103.2                   | 3.9       | 91.5                     | 7.8       | 91.3                     | 5.3       | 92.5                    | 5.3       |
| 173 | Methidathion            | 0.001 | 0.004 | 0.9999         | 290.7  | 107.2                    | 7.6       | 105.0                    | 2.6       | 96.0                    | 1.2       | 84.4                     | 6.4       | 85.4                     | 5.7       | 79.2                    | 6.0       |
| 174 | Methoprotryn            | 0.001 | 0.003 | 0.9998         | 125.4  | 109.7                    | 3.2       | 109.2                    | 4.4       | 106.1                   | 1.3       | 95.5                     | 11.8      | 99.0                     | 7.0       | 94.5                    | 1.0       |
| 175 | Methoxychlor            | 0.001 | 0.004 | 0.9992         | 93.8   | 97.5                     | 19.1      | 104.6                    | 7.1       | 102.0                   | 2.7       | 87.2                     | 28.1      | 76.9                     | 11.5      | 84.8                    | 13.6      |
| 176 | Methyl trithion         | 0.001 | 0.004 | 0.9994         | 210.3  | 107.5                    | 6.5       | 106.3                    | 2.5       | 100.1                   | 1.4       | 77.0                     | 14.6      | 90.1                     | 7.3       | 87.3                    | 7.5       |
| 177 | Metolachlor             | 0.001 | 0.004 | 0.9998         | 83.8   | 98.0                     | 3.0       | 116.4                    | 1.7       | 110.9                   | 3.9       | 91.1                     | 7.8       | 92.0                     | 5.7       | 91.7                    | 5.5       |
| 178 | Metribuzin              | 0.001 | 0.004 | 0.9994         | 78.4   | 97.5                     | 1.8       | 108.4                    | 2.1       | 105.5                   | 2.6       | 96.0                     | 3.4       | 94.5                     | 1.1       | 88.0                    | 11.9      |
| 179 | MGK-264                 | 0.001 | 0.003 | 0.9997         | 63.2   | 97.0                     | 2.1       | 109.9                    | 2.5       | 105.4                   | 2.5       | 98.4                     | 8.0       | 99.0                     | 7.0       | 95.5                    | 3.8       |
| 180 | Molinate                | 0.002 | 0.006 | 0.9999         | 40.7   | 92.6                     | 2.5       | 115.7                    | 3.7       | 102.4                   | 12.2      | 60.6                     | 86.9      | 113.2                    | 32.0      | 124.2                   | 42.4      |
| 181 | Monolinuron             | 0.002 | 0.006 | 0.9994         | 167.5  | 102.3                    | 6.1       | 114.0                    | 1.8       | 100.6                   | 6.1       | 85.3                     | 17.4      | 98.0                     | 9.5       | 95.4                    | 10.5      |
| 182 | Myclobutanil            | 0.001 | 0.003 | 1.0000         | 93.3   | 101.9                    | 3.2       | 113.3                    | 4.1       | 108.4                   | 1.3       | 92.5                     | 9.3       | 93.8                     | 4.5       | 92.6                    | 4.8       |
| 183 | Nitrothal-isopropyl     | 0.001 | 0.003 | 0.9979         | 135.8  | 119.7                    | 4.1       | 110.7                    | 1.3       | 104.7                   | 3.4       | 102.5                    | 7.0       | 92.6                     | 6.9       | 96.2                    | 5.1       |
| 184 | Nonachlor- <i>cis</i>   | 0.001 | 0.003 | 1.0000         | 27.9   | 96.0                     | 5.5       | 110.2                    | 2.3       | 107.0                   | 2.3       | 89.1                     | 18.2      | 90.5                     | 14.4      | 91.4                    | 5.1       |
|     | Nonachlor- <i>trans</i> | 0.001 | 0.004 | 1.0000         | 38.5   | 88.8                     | 2.4       | 112.8                    | 3.3       | 107.8                   | 2.8       | 96.6                     | 9.0       | 94.3                     | 7.9       | 90.6                    | 8.5       |

| No. | Analyte                 | LOD   | LOQ   | R <sup>2</sup> | ME.(%) | Repeatability (n=5)      |           |                          |           |                         |           | Reproducibility (n=11)   |           |                          |           |                         |           |
|-----|-------------------------|-------|-------|----------------|--------|--------------------------|-----------|--------------------------|-----------|-------------------------|-----------|--------------------------|-----------|--------------------------|-----------|-------------------------|-----------|
|     |                         |       |       |                |        | 0.01 mg kg <sup>-1</sup> |           | 0.02 mg kg <sup>-1</sup> |           | 0.1 mg kg <sup>-1</sup> |           | 0.01 mg kg <sup>-1</sup> |           | 0.02 mg kg <sup>-1</sup> |           | 0.1 mg kg <sup>-1</sup> |           |
|     |                         |       |       |                |        | Rec.<br>(%)              | CV<br>(%) | Rec.<br>(%)              | CV<br>(%) | Rec.<br>(%)             | CV<br>(%) | Rec.<br>(%)              | CV<br>(%) | Rec.<br>(%)              | CV<br>(%) | Rec.<br>(%)             | CV<br>(%) |
| 185 | Nuarimol                | 0.001 | 0.003 | 0.9997         | 206.5  | 91.0                     | 2.8       | 105.6                    | 5.7       | 100.1                   | 1.9       | 90.5                     | 17.5      | 90.2                     | 7.2       | 89.9                    | 4.8       |
| 186 | Ortho-phenyl phenol     | 0.002 | 0.006 | 0.9998         | 218.6  | 102.1                    | 3.3       | 119.1                    | 5.7       | 102.9                   | 8.2       | 97.8                     | 23.4      | 93.4                     | 11.5      | 94.0                    | 9.3       |
| 187 | Oxadiazon               | 0.001 | 0.003 | 1.0000         | 72.9   | 102.3                    | 2.6       | 112.8                    | 3.2       | 108.1                   | 1.7       | 94.0                     | 4.9       | 97.0                     | 3.2       | 92.6                    | 4.7       |
| 188 | Oxadixyl                | 0.001 | 0.004 | 0.9998         | 70.4   | 107.3                    | 4.1       | 110.9                    | 4.3       | 106.0                   | 1.5       | 94.7                     | 4.6       | 95.1                     | 4.6       | 93.4                    | 5.3       |
| 189 | Oxyfluorfen             | 0.001 | 0.004 | 0.9993         | 168.3  | 119.6                    | 7.0       | 108.9                    | 3.5       | 106.8                   | 1.5       | 94.0                     | 3.2       | 96.5                     | 9.7       | 100.5                   | 2.3       |
| 190 | Paclobutrazol           | 0.002 | 0.005 | 0.9997         | 374.4  | 109.3                    | 3.6       | 106.5                    | 5.1       | 101.4                   | 2.0       | 92.1                     | 11.2      | 93.1                     | 3.4       | 91.2                    | 5.0       |
| 191 | Parathion               | 0.001 | 0.004 | 0.9994         | 138.8  | 119.3                    | 4.6       | 111.4                    | 1.7       | 105.2                   | 3.1       | 92.5                     | 4.6       | 90.5                     | 6.0       | 95.0                    | 4.3       |
| 192 | Parathion-methyl        | 0.001 | 0.004 | 0.9991         | 164.2  | 119.7                    | 7.3       | 105.8                    | 1.7       | 99.4                    | 4.1       | 89.6                     | 9.8       | 89.8                     | 10.0      | 90.3                    | 3.3       |
| 193 | Penconazole             | 0.001 | 0.003 | 0.9999         | 62.7   | 99.1                     | 2.4       | 109.3                    | 2.7       | 105.3                   | 1.8       | 93.5                     | 7.2       | 93.4                     | 2.8       | 90.9                    | 4.3       |
| 194 | Pendimethalin           | 0.001 | 0.003 | 0.9991         | 101.7  | 119.9                    | 4.4       | 108.3                    | 2.8       | 103.5                   | 2.8       | 96.0                     | 4.8       | 91.9                     | 4.8       | 94.1                    | 3.8       |
| 195 | Penflufen               | 0.001 | 0.004 | 1.0000         | 197.9  | 102.9                    | 3.6       | 108.6                    | 5.0       | 105.2                   | 1.0       | 89.2                     | 11.0      | 93.3                     | 2.3       | 92.1                    | 4.7       |
| 196 | Pentachlorobenzonitrile | 0.001 | 0.003 | 0.9996         | 58.3   | 108.0                    | 3.4       | 115.7                    | 1.6       | 108.8                   | 7.3       | 90.3                     | 4.8       | 92.1                     | 4.4       | 91.0                    | 8.7       |
| 197 | Penthiopyrad            | 0.001 | 0.004 | 0.9995         | 245.3  | 109.3                    | 3.2       | 108.5                    | 4.6       | 105.0                   | 1.0       | 91.4                     | 8.4       | 94.9                     | 2.0       | 93.8                    | 4.6       |
| 198 | Pentoxazone             | 0.001 | 0.003 | 0.9999         | 141.6  | 112.2                    | 2.8       | 107.0                    | 5.0       | 102.6                   | 1.5       | 92.8                     | 6.4       | 94.6                     | 1.6       | 91.6                    | 3.8       |
| 199 | Permethrin-cis          | 0.003 | 0.008 | 0.9999         | 298.9  | 98.4                     | 8.2       | 111.6                    | 8.5       | 106.7                   | 1.3       | 101.9                    | 12.4      | 97.4                     | 8.7       | 91.2                    | 5.0       |
|     | Permethrin-trans        | 0.001 | 0.003 | 0.9994         | 237.1  | 85.1                     | 7.3       | 104.8                    | 5.3       | 102.3                   | 1.3       | 93.9                     | 7.3       | 95.4                     | 1.8       | 91.2                    | 3.6       |
| 200 | Perthane                | 0.001 | 0.003 | 0.9999         | 66.9   | 94.8                     | 2.9       | 111.8                    | 3.8       | 106.8                   | 2.4       | 93.9                     | 4.3       | 96.3                     | 3.9       | 92.5                    | 5.4       |
| 201 | Phenthoate              | 0.001 | 0.003 | 0.9992         | 106.9  | 118.9                    | 3.1       | 109.8                    | 2.5       | 104.1                   | 2.0       | 88.5                     | 8.6       | 91.1                     | 0.9       | 90.5                    | 1.9       |
| 202 | Phosphamidon (E)        | 0.003 | 0.009 | 0.9998         | >500   | 103.3                    | 28.0      | 99.4                     | 4.7       | 89.6                    | 0.5       | 87.0                     | 7.0       | 89.0                     | 18.5      | 87.9                    | 7.5       |
|     | Phosphamidon (Z)        | 0.001 | 0.004 | 0.9993         | 433.4  | 112.3                    | 14.2      | 90.6                     | 8.0       | 74.0                    | 2.2       | 88.4                     | 7.1       | 87.7                     | 16.2      | 82.8                    | 5.7       |
| 203 | Phosalone               | 0.001 | 0.004 | 0.9996         | 432.7  | 116.6                    | 9.3       | 91.1                     | 4.7       | 83.7                    | 4.8       | 81.1                     | 24.3      | 85.1                     | 12.9      | 83.5                    | 11.3      |
| 204 | Phosmet                 | 0.001 | 0.004 | 0.9998         | >500   | 105.2                    | 8.1       | 92.5                     | 3.7       | 83.2                    | 3.3       | 80.5                     | 16.1      | 86.5                     | 10.4      | 89.1                    | 13.7      |
| 205 | Picoxystrobin           | 0.001 | 0.003 | 0.9999         | 133.0  | 96.5                     | 3.4       | 118.5                    | 3.5       | 111.5                   | 2.2       | 91.7                     | 6.0       | 95.5                     | 3.5       | 92.6                    | 5.0       |

| No. | Analyte               | LOD   | LOQ   | R <sup>2</sup> | ME.(%) | Repeatability (n=5)      |           |                          |           |                         |           | Reproducibility (n=11)   |           |                          |           |                         |           |
|-----|-----------------------|-------|-------|----------------|--------|--------------------------|-----------|--------------------------|-----------|-------------------------|-----------|--------------------------|-----------|--------------------------|-----------|-------------------------|-----------|
|     |                       |       |       |                |        | 0.01 mg kg <sup>-1</sup> |           | 0.02 mg kg <sup>-1</sup> |           | 0.1 mg kg <sup>-1</sup> |           | 0.01 mg kg <sup>-1</sup> |           | 0.02 mg kg <sup>-1</sup> |           | 0.1 mg kg <sup>-1</sup> |           |
|     |                       |       |       |                |        | Rec.<br>(%)              | CV<br>(%) | Rec.<br>(%)              | CV<br>(%) | Rec.<br>(%)             | CV<br>(%) | Rec.<br>(%)              | CV<br>(%) | Rec.<br>(%)              | CV<br>(%) | Rec.<br>(%)             | CV<br>(%) |
| 206 | Piperonyl butoxide    | 0.001 | 0.003 | 0.9999         | 292.3  | 112.1                    | 3.3       | 108.4                    | 4.7       | 102.0                   | 1.3       | 96.6                     | 2.7       | 96.6                     | 3.2       | 94.3                    | 5.2       |
| 207 | Pirimicarb            | 0.001 | 0.004 | 0.9998         | 88.1   | 90.6                     | 3.0       | 112.3                    | 1.2       | 105.5                   | 5.1       | 94.0                     | 3.8       | 94.5                     | 1.8       | 92.7                    | 4.4       |
| 208 | Pirimiphos-ethyl      | 0.001 | 0.003 | 0.9985         | 83.1   | 105.3                    | 4.0       | 107.9                    | 1.3       | 105.5                   | 3.4       | 94.4                     | 4.4       | 95.9                     | 2.1       | 93.9                    | 3.3       |
| 209 | Pirimiphos-methyl     | 0.001 | 0.003 | 0.9990         | 97.1   | 95.1                     | 2.0       | 107.2                    | 3.0       | 103.8                   | 3.5       | 97.3                     | 8.2       | 93.0                     | 3.4       | 90.0                    | 3.9       |
| 210 | Pretilachlor          | 0.001 | 0.003 | 1.0000         | 116.9  | 111.5                    | 3.9       | 113.6                    | 3.8       | 107.1                   | 1.8       | 97.5                     | 12.4      | 97.8                     | 2.1       | 93.2                    | 3.3       |
| 211 | Prochloraz            | 0.002 | 0.005 | 0.9994         | >500   | 108.5                    | 5.0       | 106.7                    | 5.4       | 100.5                   | 0.4       | 78.2                     | 12.0      | 85.0                     | 3.8       | 91.8                    | 12.4      |
|     | 2,4,6-trichlorophenol | 0.003 | 0.009 | 0.9981         | 123.8  | 164.3                    | 6.1       | 106.1                    | 6.0       | 93.3                    | 10.0      | 75.7                     | 3.2       | 77.8                     | 2.7       | 103.9                   | 42.1      |
| 212 | Procymidone           | 0.003 | 0.009 | 0.9999         | 51.4   | 94.6                     | 2.7       | 117.2                    | 3.5       | 107.2                   | 2.6       | 88.8                     | 3.4       | 90.7                     | 2.0       | 91.9                    | 8.7       |
| 213 | Prodiamine            | 0.001 | 0.003 | 0.9992         | 88.6   | 108.7                    | 1.7       | 109.3                    | 3.1       | 105.3                   | 4.4       | 95.0                     | 6.6       | 94.8                     | 4.6       | 93.9                    | 1.9       |
| 214 | Profenofos            | 0.002 | 0.005 | 0.9999         | 379.1  | 118.4                    | 11.2      | 104.7                    | 3.5       | 96.5                    | 1.8       | 82.5                     | 15.0      | 88.0                     | 8.9       | 83.6                    | 8.4       |
| 215 | Profluralin           | 0.001 | 0.004 | 0.9992         | 57.8   | 101.7                    | 2.3       | 110.9                    | 1.9       | 104.8                   | 8.0       | 102.0                    | 7.0       | 97.7                     | 7.8       | 98.9                    | 2.8       |
| 216 | Prohydrojasmon        | 0.002 | 0.006 | 0.9982         | 115.9  | 86.1                     | 2.3       | 98.8                     | 3.8       | 100.3                   | 6.4       | 89.8                     | 5.7       | 90.8                     | 4.4       | 91.3                    | 7.2       |
| 217 | Prometon              | 0.001 | 0.003 | 0.9996         | 107.2  | 91.1                     | 3.0       | 111.5                    | 1.1       | 103.0                   | 5.9       | 95.7                     | 5.0       | 98.2                     | 8.8       | 98.7                    | 3.6       |
| 218 | Prometryn             | 0.001 | 0.003 | 0.9992         | 82.1   | 87.1                     | 1.6       | 108.0                    | 2.3       | 101.8                   | 3.5       | 90.2                     | 7.4       | 90.3                     | 4.0       | 90.2                    | 5.9       |
| 219 | Propachlor            | 0.002 | 0.005 | 0.9997         | 73.6   | 105.5                    | 4.0       | 116.8                    | 2.4       | 103.8                   | 10.3      | 93.3                     | 3.8       | 93.8                     | 3.9       | 92.9                    | 6.6       |
| 220 | Propanil              | 0.001 | 0.004 | 0.9993         | 135.9  | 96.4                     | 3.5       | 104.8                    | 7.9       | 102.7                   | 3.3       | 98.4                     | 10.9      | 96.6                     | 11.0      | 95.4                    | 3.4       |
| 221 | Propazine             | 0.001 | 0.004 | 0.9998         | 72.0   | 94.6                     | 1.7       | 112.0                    | 0.6       | 104.8                   | 5.4       | 94.8                     | 7.2       | 93.8                     | 3.3       | 91.4                    | 5.7       |
| 222 | Propetamphos          | 0.001 | 0.004 | 0.9996         | 91.9   | 99.2                     | 3.2       | 109.0                    | 3.6       | 104.7                   | 6.5       | 91.0                     | 12.0      | 92.4                     | 5.3       | 91.6                    | 6.0       |
| 223 | Propham               | 0.002 | 0.006 | 0.9998         | 114.0  | 89.3                     | 4.1       | 114.8                    | 1.9       | 100.2                   | 12.3      | 91.5                     | 4.6       | 97.1                     | 9.5       | 95.3                    | 9.5       |
| 224 | Propiconazole-1       | 0.001 | 0.004 | 0.9998         | 130.9  | 97.6                     | 2.3       | 110.9                    | 3.2       | 105.1                   | 0.1       | 92.7                     | 11.1      | 92.7                     | 1.7       | 91.8                    | 3.7       |
|     | Propiconazole-2       | 0.002 | 0.005 | 0.9998         | 149.3  | 93.1                     | 2.8       | 110.1                    | 5.4       | 103.9                   | 2.5       | 94.5                     | 8.9       | 94.7                     | 0.2       | 92.9                    | 2.7       |
| 225 | Propisochlor          | 0.001 | 0.003 | 0.9981         | 65.9   | 100.8                    | 3.3       | 108.1                    | 2.4       | 103.6                   | 4.8       | 91.4                     | 5.3       | 93.9                     | 0.2       | 91.0                    | 7.8       |
| 226 | Propyzamide           | 0.001 | 0.004 | 0.9983         | 103.6  | 95.6                     | 2.6       | 113.4                    | 2.0       | 106.5                   | 4.1       | 91.4                     | 7.3       | 93.0                     | 1.9       | 92.4                    | 6.1       |

| No. | Analyte                | LOD   | LOQ   | R <sup>2</sup> | ME.(%) | Repeatability (n=5)      |           |                          |           |                         |           | Reproducibility (n=11)   |           |                          |           |                         |           |
|-----|------------------------|-------|-------|----------------|--------|--------------------------|-----------|--------------------------|-----------|-------------------------|-----------|--------------------------|-----------|--------------------------|-----------|-------------------------|-----------|
|     |                        |       |       |                |        | 0.01 mg kg <sup>-1</sup> |           | 0.02 mg kg <sup>-1</sup> |           | 0.1 mg kg <sup>-1</sup> |           | 0.01 mg kg <sup>-1</sup> |           | 0.02 mg kg <sup>-1</sup> |           | 0.1 mg kg <sup>-1</sup> |           |
|     |                        |       |       |                |        | Rec.<br>(%)              | CV<br>(%) | Rec.<br>(%)              | CV<br>(%) | Rec.<br>(%)             | CV<br>(%) | Rec.<br>(%)              | CV<br>(%) | Rec.<br>(%)              | CV<br>(%) | Rec.<br>(%)             | CV<br>(%) |
| 227 | Prothiofos             | 0.001 | 0.004 | 0.9999         | 119.1  | 96.3                     | 2.8       | 112.8                    | 3.5       | 107.6                   | 2.2       | 88.4                     | 8.1       | 92.1                     | 5.9       | 89.3                    | 6.5       |
| 228 | Pyracarbolid           | 0.002 | 0.005 | 0.9995         | 158.2  | 105.1                    | 3.1       | 112.5                    | 4.6       | 107.2                   | 1.9       | 103.1                    | 14.1      | 99.8                     | 8.9       | 94.4                    | 2.4       |
| 229 | Pyraclufos             | 0.002 | 0.006 | 0.9997         | >500   | 98.7                     | 8.2       | 92.7                     | 5.9       | 80.8                    | 3.1       | 78.1                     | 9.7       | 86.9                     | 4.3       | 87.3                    | 11.5      |
| 230 | Pyraflufen-ethyl       | 0.001 | 0.004 | 1.0000         | 176.8  | 104.3                    | 3.5       | 107.3                    | 5.0       | 103.0                   | 1.3       | 91.5                     | 9.2       | 93.4                     | 3.7       | 92.1                    | 5.0       |
| 231 | Pyrazophos             | 0.001 | 0.004 | 0.9991         | 332.1  | 113.4                    | 7.8       | 102.1                    | 4.3       | 96.5                    | 0.6       | 86.1                     | 15.7      | 88.0                     | 7.5       | 88.0                    | 7.0       |
| 232 | Pyridalyl              | 0.001 | 0.003 | 0.9994         | 303.2  | 87.1                     | 3.7       | 100.0                    | 7.2       | 99.7                    | 0.8       | 91.6                     | 3.1       | 90.2                     | 5.3       | 90.5                    | 3.2       |
| 233 | Pyrifenox              | 0.001 | 0.004 | 0.9998         | 100.4  | 91.1                     | 2.7       | 108.8                    | 2.3       | 103.2                   | 1.5       | 91.1                     | 10.2      | 91.3                     | 3.5       | 89.5                    | 7.3       |
| 234 | Pyriftalid             | 0.001 | 0.004 | 0.9994         | 278.4  | 104.4                    | 4.2       | 105.5                    | 4.7       | 102.1                   | 1.5       | 92.4                     | 11.0      | 94.3                     | 5.8       | 91.2                    | 1.8       |
| 235 | Pyrimethanil           | 0.001 | 0.004 | 1.0000         | 80.1   | 90.4                     | 2.2       | 111.0                    | 0.9       | 103.7                   | 5.4       | 91.2                     | 9.5       | 91.7                     | 4.2       | 91.1                    | 7.6       |
| 236 | Pyriminobac-methyl (E) | 0.001 | 0.004 | 1.0000         | 167.4  | 103.7                    | 3.6       | 114.4                    | 4.6       | 107.7                   | 2.0       | 93.4                     | 7.9       | 93.7                     | 1.1       | 94.2                    | 3.8       |
|     | Pyriminobac-methyl (Z) | 0.001 | 0.003 | 0.9997         | 84.4   | 101.3                    | 2.4       | 110.9                    | 4.4       | 108.1                   | 1.7       | 91.9                     | 7.1       | 94.7                     | 2.5       | 93.4                    | 4.9       |
| 237 | Quinalphos             | 0.001 | 0.004 | 0.9997         | 92.8   | 110.1                    | 3.3       | 110.2                    | 3.7       | 104.4                   | 1.5       | 92.4                     | 10.4      | 97.6                     | 9.4       | 90.0                    | 0.4       |
| 238 | Quinoxifen             | 0.001 | 0.003 | 1.0000         | 63.8   | 87.6                     | 2.7       | 108.6                    | 4.9       | 103.8                   | 2.1       | 87.9                     | 9.7       | 90.5                     | 4.3       | 87.9                    | 4.2       |
| 239 | Quintozene             | 0.001 | 0.004 | 0.9987         | 60.5   | 119.8                    | 6.7       | 106.0                    | 3.7       | 100.8                   | 9.0       | 94.5                     | 12.0      | 92.2                     | 10.1      | 89.5                    | 7.7       |
| 240 | Quizalofop-ethyl       | 0.001 | 0.003 | 0.9982         | 303.7  | 101.0                    | 4.3       | 104.9                    | 5.9       | 103.1                   | 0.8       | 88.1                     | 11.1      | 94.2                     | 0.5       | 92.7                    | 0.7       |
| 241 | Silafluofen            | 0.001 | 0.003 | 0.9989         | 185.9  | 87.5                     | 3.1       | 101.0                    | 5.3       | 100.8                   | 1.1       | 93.7                     | 3.5       | 93.2                     | 4.1       | 90.5                    | 4.2       |
| 242 | Simeconazole           | 0.001 | 0.004 | 0.9986         | 138.7  | 95.8                     | 2.6       | 106.6                    | 3.2       | 103.8                   | 4.4       | 92.3                     | 8.0       | 92.5                     | 3.0       | 92.8                    | 5.8       |
| 243 | Simetryn               | 0.001 | 0.004 | 0.9994         | 95.0   | 91.5                     | 2.4       | 108.4                    | 2.0       | 102.8                   | 3.1       | 93.5                     | 2.3       | 91.8                     | 1.5       | 92.2                    | 1.9       |
| 244 | Spiromesifen           | 0.001 | 0.004 | 0.9999         | 207.9  | 104.6                    | 9.8       | 106.3                    | 5.1       | 99.3                    | 0.9       | 81.1                     | 15.6      | 87.9                     | 4.2       | 86.7                    | 4.9       |
| 245 | Spiroxamine-1          | 0.002 | 0.005 | 0.9983         | 139.5  | 85.0                     | 5.7       | 94.2                     | 6.0       | 84.7                    | 5.9       | 95.6                     | 6.0       | 92.9                     | 2.6       | 98.2                    | 6.4       |
|     | Spiroxamine-2          | 0.002 | 0.005 | 0.9987         | 94.8   | 86.8                     | 3.8       | 95.9                     | 2.9       | 87.2                    | 4.7       | 94.3                     | 9.7       | 95.6                     | 9.5       | 102.8                   | 10.5      |
| 246 | Sulfotep               | 0.001 | 0.004 | 0.9996         | 54.3   | 94.4                     | 2.9       | 111.4                    | 2.5       | 103.2                   | 8.1       | 94.4                     | 5.1       | 96.6                     | 3.6       | 94.6                    | 5.1       |
| 247 | Tebuconazole           | 0.002 | 0.005 | 0.9999         | 356.6  | 99.9                     | 3.1       | 108.1                    | 4.7       | 100.1                   | 1.4       | 86.6                     | 9.3       | 90.6                     | 1.6       | 92.0                    | 4.4       |

| No. | Analyte           | LOD   | LOQ   | R <sup>2</sup> | ME.(%) | Repeatability (n=5)      |           |                          |           |                         |           | Reproducibility (n=11)   |           |                          |           |                         |           |
|-----|-------------------|-------|-------|----------------|--------|--------------------------|-----------|--------------------------|-----------|-------------------------|-----------|--------------------------|-----------|--------------------------|-----------|-------------------------|-----------|
|     |                   |       |       |                |        | 0.01 mg kg <sup>-1</sup> |           | 0.02 mg kg <sup>-1</sup> |           | 0.1 mg kg <sup>-1</sup> |           | 0.01 mg kg <sup>-1</sup> |           | 0.02 mg kg <sup>-1</sup> |           | 0.1 mg kg <sup>-1</sup> |           |
|     |                   |       |       |                |        | Rec.<br>(%)              | CV<br>(%) | Rec.<br>(%)              | CV<br>(%) | Rec.<br>(%)             | CV<br>(%) | Rec.<br>(%)              | CV<br>(%) | Rec.<br>(%)              | CV<br>(%) | Rec.<br>(%)             | CV<br>(%) |
| 248 | Tebufenpyrad      | 0.001 | 0.003 | 0.9997         | 166.9  | 89.9                     | 3.0       | 107.3                    | 5.5       | 102.2                   | 1.2       | 93.5                     | 6.1       | 94.0                     | 0.6       | 92.2                    | 2.1       |
| 249 | Tebupirimfos      | 0.001 | 0.004 | 0.9997         | 74.4   | 91.6                     | 2.2       | 113.3                    | 2.9       | 106.1                   | 5.7       | 96.4                     | 3.3       | 95.5                     | 2.8       | 94.2                    | 6.2       |
| 250 | Tecnazene         | 0.002 | 0.005 | 0.9997         | 60.2   | 113.4                    | 4.9       | 113.3                    | 3.8       | 95.1                    | 11.5      | 94.8                     | 7.0       | 93.5                     | 7.0       | 93.9                    | 9.3       |
| 251 | Tefluthrin        | 0.001 | 0.004 | 0.9997         | 33.5   | 89.1                     | 1.9       | 109.0                    | 2.1       | 108.0                   | 6.1       | 96.8                     | 5.2       | 96.7                     | 4.5       | 95.2                    | 6.8       |
| 252 | Terbacil          | 0.002 | 0.005 | 0.9991         | 272.4  | 109.6                    | 3.7       | 104.3                    | 3.7       | 98.2                    | 3.4       | 94.6                     | 8.5       | 92.7                     | 6.1       | 91.8                    | 3.6       |
| 253 | Terbumeton        | 0.001 | 0.004 | 0.9984         | 100.0  | 92.8                     | 4.1       | 111.2                    | 0.9       | 103.9                   | 5.7       | 97.2                     | 8.3       | 94.0                     | 2.2       | 94.6                    | 1.3       |
| 254 | Terbutryn         | 0.001 | 0.004 | 0.9989         | 85.9   | 89.8                     | 2.9       | 108.4                    | 2.1       | 102.6                   | 2.9       | 93.1                     | 5.6       | 91.2                     | 5.1       | 89.2                    | 4.9       |
| 255 | Tetrachlorvinphos | 0.001 | 0.004 | 0.9999         | 394.5  | 93.4                     | 9.6       | 93.4                     | 3.9       | 83.4                    | 0.6       | 83.0                     | 6.0       | 85.8                     | 16.5      | 79.8                    | 7.0       |
| 256 | Tetraconazole     | 0.001 | 0.004 | 0.9999         | 84.2   | 99.9                     | 3.4       | 115.0                    | 2.8       | 108.8                   | 2.0       | 95.1                     | 6.1       | 94.3                     | 2.4       | 92.7                    | 5.0       |
| 257 | Tetradifon        | 0.001 | 0.003 | 0.9999         | 68.3   | 100.1                    | 2.8       | 110.2                    | 4.8       | 105.8                   | 2.3       | 89.7                     | 8.0       | 91.4                     | 4.6       | 89.5                    | 4.2       |
| 258 | Tetramethrin-1    | 0.001 | 0.004 | 1.0000         | 468.5  | 118.8                    | 12.9      | 110.3                    | 6.3       | 97.4                    | 1.1       | 151.4                    | 70.4      | 92.8                     | 1.3       | 92.3                    | 0.3       |
|     | Tetramethrin-2    | 0.003 | 0.008 | 0.9999         | 330.0  | 89.3                     | 15.2      | 112.5                    | 5.3       | 104.2                   | 1.2       | 84.4                     | 40.3      | 70.4                     | 6.5       | 78.2                    | 1.7       |
| 259 | Thifluzamide      | 0.001 | 0.004 | 0.9999         | 293.5  | 115.4                    | 9.3       | 111.9                    | 4.5       | 108.2                   | 1.7       | 91.1                     | 10.4      | 95.0                     | 3.2       | 93.5                    | 5.4       |
| 260 | Thiometon         | 0.002 | 0.005 | 0.9995         | 80.9   | 83.8                     | 5.1       | 113.2                    | 2.1       | 96.2                    | 2.1       | 81.0                     | 20.8      | 85.0                     | 13.2      | 90.3                    | 13.7      |
| 261 | Thionazin         | 0.003 | 0.009 | 0.9995         | 66.0   | 90.4                     | 3.8       | 117.4                    | 2.9       | 103.6                   | 10.1      | 94.3                     | 5.2       | 93.2                     | 4.8       | 93.2                    | 7.8       |
| 262 | Tolclofos-methyl  | 0.001 | 0.004 | 0.9981         | 71.8   | 92.9                     | 3.1       | 114.7                    | 1.8       | 108.3                   | 4.9       | 92.0                     | 5.3       | 94.2                     | 2.9       | 90.7                    | 6.9       |
| 263 | Triadimefon       | 0.001 | 0.004 | 0.9996         | 78.5   | 102.4                    | 3.0       | 114.9                    | 3.0       | 109.0                   | 2.8       | 94.6                     | 3.8       | 93.2                     | 1.7       | 92.9                    | 4.8       |
| 264 | Triadimenol       | 0.002 | 0.006 | 0.9997         | 180.9  | 93.0                     | 3.0       | 106.7                    | 4.9       | 101.1                   | 2.5       | 90.4                     | 10.9      | 91.5                     | 3.3       | 95.9                    | 1.6       |
| 265 | Tri-allate        | 0.001 | 0.003 | 0.9995         | 59.8   | 88.8                     | 1.3       | 113.0                    | 2.0       | 108.6                   | 6.1       | 91.8                     | 7.7       | 92.9                     | 5.2       | 92.3                    | 7.1       |
| 266 | Triazophos        | 0.001 | 0.004 | 0.9996         | 273.1  | 114.0                    | 8.8       | 105.8                    | 4.2       | 99.6                    | 1.4       | 83.8                     | 20.9      | 90.0                     | 4.1       | 88.7                    | 5.1       |
| 267 | Tridiphane        | 0.001 | 0.004 | 0.9977         | 59.6   | 104.0                    | 10.7      | 106.0                    | 2.7       | 102.4                   | 5.0       | 93.6                     | 13.5      | 88.0                     | 12.0      | 95.5                    | 11.8      |
| 268 | Trifloxystrobin   | 0.001 | 0.003 | 0.9999         | 119.6  | 110.2                    | 1.8       | 110.2                    | 4.4       | 105.7                   | 1.4       | 94.8                     | 7.4       | 95.8                     | 1.7       | 94.9                    | 2.8       |
| 269 | Triflumizole      | 0.001 | 0.004 | 0.9997         | 94.9   | 98.0                     | 3.5       | 104.2                    | 1.5       | 99.7                    | 3.2       | 90.6                     | 2.7       | 90.8                     | 1.7       | 90.2                    | 1.3       |

| No. | Analyte     | LOD   | LOQ   | R <sup>2</sup> | ME.(%) | Repeatability (n=5)      |           |                          |           |                         |           | Reproducibility (n=11)   |           |                          |           |                         |           |
|-----|-------------|-------|-------|----------------|--------|--------------------------|-----------|--------------------------|-----------|-------------------------|-----------|--------------------------|-----------|--------------------------|-----------|-------------------------|-----------|
|     |             |       |       |                |        | 0.01 mg kg <sup>-1</sup> |           | 0.02 mg kg <sup>-1</sup> |           | 0.1 mg kg <sup>-1</sup> |           | 0.01 mg kg <sup>-1</sup> |           | 0.02 mg kg <sup>-1</sup> |           | 0.1 mg kg <sup>-1</sup> |           |
|     |             |       |       |                |        | Rec.<br>(%)              | CV<br>(%) | Rec.<br>(%)              | CV<br>(%) | Rec.<br>(%)             | CV<br>(%) | Rec.<br>(%)              | CV<br>(%) | Rec.<br>(%)              | CV<br>(%) | Rec.<br>(%)             | CV<br>(%) |
| 270 | Trifluralin | 0.001 | 0.004 | 0.9995         | 60.6   | 100.0                    | 1.8       | 111.2                    | 3.5       | 104.1                   | 9.3       | 98.3                     | 4.3       | 97.5                     | 3.8       | 99.7                    | 6.1       |
| 271 | Vinclozolin | 0.001 | 0.003 | 0.9990         | 56.0   | 103.0                    | 2.9       | 115.0                    | 2.6       | 107.4                   | 3.5       | 91.2                     | 8.0       | 93.2                     | 4.4       | 93.3                    | 10.2      |
| 272 | Zoxamide    | 0.002 | 0.005 | 0.9998         | >500   | 98.6                     | 11.8      | 86.9                     | 14.1      | 79.6                    | 11.9      | 97.9                     | 9.2       | 97.7                     | 12.7      | 83.8                    | 15.8      |
